# Supplementary material for: Pre-transplant Transcriptional Signature in Peripheral Blood Mononuclear Cells of Acute Renal Allograft Rejection
Source: Front Med (Lausanne). 2022 Jan 7;8:799051. doi: 10.3389/fmed.2021.799051 (PMC8777044; doi:10.3389/fmed.2021.799051)
Supplement: Supplementary file 1 [file Table_1.XLSX]

## Sheet: Recipient_DEGs_limma
	ensembl_gene_id	logFC	AveExpr	t	P.Value	adj.P.Val	B	change	external_gene_name	description
10410	ENSG00000169429	8.31337	5.25462	4.76359	1.97e-05	0.0051433	2.73538	UP	CXCL8	C-X-C motif chemokine ligand 8 [Source:HGNC Symbol;Acc:HGNC:6025]
2	ENSG00000000419	0.323613	4.27121	1.66273	0.103245	0.280805	-5.16196	NOT	DPM1	dolichyl-phosphate mannosyltransferase subunit 1, catalytic [Source:HGNC Symbol;Acc:HGNC:3005]
3	ENSG00000000457	-0.13933	3.95093	-1.1362	0.261824	0.475402	-5.83792	NOT	SCYL3	SCY1 like pseudokinase 3 [Source:HGNC Symbol;Acc:HGNC:19285]
4	ENSG00000000460	-0.152032	3.43406	-0.926815	0.358916	0.571956	-5.98885	NOT	C1orf112	chromosome 1 open reading frame 112 [Source:HGNC Symbol;Acc:HGNC:25565]
5	ENSG00000000938	-0.0793137	9.85499	-0.523813	0.602952	0.769927	-6.42705	NOT	FGR	FGR proto-oncogene, Src family tyrosine kinase [Source:HGNC Symbol;Acc:HGNC:3697]
6	ENSG00000000971	-0.351713	2.0964	-1.33813	0.187507	0.392398	-5.37334	NOT	CFH	complement factor H [Source:HGNC Symbol;Acc:HGNC:4883]
7	ENSG00000001036	-0.434586	2.35597	-2.17803	0.0346287	0.159982	-4.05065	NOT	FUCA2	alpha-L-fucosidase 2 [Source:HGNC Symbol;Acc:HGNC:4008]
8	ENSG00000001084	-0.264112	4.38852	-1.67037	0.101716	0.278658	-5.16347	NOT	GCLC	glutamate-cysteine ligase catalytic subunit [Source:HGNC Symbol;Acc:HGNC:4311]
9	ENSG00000001167	0.0958701	4.2536	0.691675	0.492658	0.686448	-6.26488	NOT	NFYA	nuclear transcription factor Y subunit alpha [Source:HGNC Symbol;Acc:HGNC:7804]
10	ENSG00000001460	0.0785332	0.21464	0.330667	0.742415	0.863494	-5.94877	NOT	STPG1	sperm tail PG-rich repeat containing 1 [Source:HGNC Symbol;Acc:HGNC:28070]
11	ENSG00000001461	-0.378516	5.21536	-2.1614	0.0359662	0.162509	-4.34474	NOT	NIPAL3	NIPA like domain containing 3 [Source:HGNC Symbol;Acc:HGNC:25233]
12	ENSG00000001497	-0.287021	5.40893	-2.28306	0.0271507	0.142254	-4.10824	NOT	LAS1L	LAS1 like ribosome biogenesis factor [Source:HGNC Symbol;Acc:HGNC:25726]
13	ENSG00000001561	-0.090741	3.81076	-0.461011	0.646988	0.801037	-6.35138	NOT	ENPP4	ectonucleotide pyrophosphatase/phosphodiesterase 4 [Source:HGNC Symbol;Acc:HGNC:3359]
20040	ENSG00000278996	7.77918	2.44796	6.49337	5.52e-08	8.8e-05	8.05514	UP	FP671120.5	novel transcript
15	ENSG00000001626	0.333701	-2.75997	0.812344	0.420827	0.626733	-5.48557	NOT	CFTR	CF transmembrane conductance regulator [Source:HGNC Symbol;Acc:HGNC:1884]
16	ENSG00000001629	-0.139306	5.4498	-0.785273	0.436366	0.640259	-6.27427	NOT	ANKIB1	ankyrin repeat and IBR domain containing 1 [Source:HGNC Symbol;Acc:HGNC:22215]
17	ENSG00000002016	-0.104804	4.05843	-0.83884	0.405947	0.614691	-6.13557	NOT	RAD52	RAD52 homolog, DNA repair protein [Source:HGNC Symbol;Acc:HGNC:9824]
18	ENSG00000002330	0.27705	1.44243	1.0044	0.320503	0.534481	-5.65689	NOT	BAD	BCL2 associated agonist of cell death [Source:HGNC Symbol;Acc:HGNC:936]
19	ENSG00000002549	-0.280712	4.89993	-1.50076	0.14033	0.333518	-5.45449	NOT	LAP3	leucine aminopeptidase 3 [Source:HGNC Symbol;Acc:HGNC:18449]
20	ENSG00000002587	0.1242	0.0285125	0.441688	0.660808	0.809869	-5.88824	NOT	HS3ST1	heparan sulfate-glucosamine 3-sulfotransferase 1 [Source:HGNC Symbol;Acc:HGNC:5194]
3543	ENSG00000112715	7.77613	3.39635	8.0632	2.59e-10	2.68e-06	12.9748	UP	VEGFA	vascular endothelial growth factor A [Source:HGNC Symbol;Acc:HGNC:12680]
22	ENSG00000002745	-0.555801	-0.123	-1.94339	0.058174	0.207028	-4.24127	NOT	WNT16	Wnt family member 16 [Source:HGNC Symbol;Acc:HGNC:16267]
23	ENSG00000002746	0.707374	-2.39177	1.48892	0.143411	0.337364	-4.80052	NOT	HECW1	HECT, C2 and WW domain containing E3 ubiquitin protein ligase 1 [Source:HGNC Symbol;Acc:HGNC:22195]
24	ENSG00000002834	0.376087	6.25489	2.07452	0.0437194	0.179005	-4.53691	NOT	LASP1	LIM and SH3 protein 1 [Source:HGNC Symbol;Acc:HGNC:6513]
25	ENSG00000002919	-0.0713532	5.32513	-0.596307	0.553927	0.732762	-6.39912	NOT	SNX11	sorting nexin 11 [Source:HGNC Symbol;Acc:HGNC:14975]
26	ENSG00000002933	-0.0385409	4.63607	-0.0736567	0.941607	0.972972	-6.53402	NOT	TMEM176A	transmembrane protein 176A [Source:HGNC Symbol;Acc:HGNC:24930]
27	ENSG00000003056	-0.476642	6.2938	-2.34491	0.0234547	0.132729	-3.99623	NOT	M6PR	mannose-6-phosphate receptor, cation dependent [Source:HGNC Symbol;Acc:HGNC:6752]
28	ENSG00000003096	0.598968	-0.783606	2.05054	0.0461011	0.184117	-4.00506	NOT	KLHL13	kelch like family member 13 [Source:HGNC Symbol;Acc:HGNC:22931]
29	ENSG00000003147	-0.137414	2.36984	-0.589761	0.55827	0.736142	-6.10023	NOT	ICA1	islet cell autoantigen 1 [Source:HGNC Symbol;Acc:HGNC:5343]
30	ENSG00000003249	-0.250677	0.717796	-0.685254	0.496662	0.689557	-5.83546	NOT	DBNDD1	dysbindin domain containing 1 [Source:HGNC Symbol;Acc:HGNC:28455]
31	ENSG00000003393	-0.0402292	4.06645	-0.28119	0.779841	0.885155	-6.44518	NOT	ALS2	alsin Rho guanine nucleotide exchange factor ALS2 [Source:HGNC Symbol;Acc:HGNC:443]
32	ENSG00000003400	-0.208475	6.05603	-1.77457	0.0826638	0.249339	-5.06922	NOT	CASP10	caspase 10 [Source:HGNC Symbol;Acc:HGNC:1500]
33	ENSG00000003402	-0.236239	8.64805	-1.45221	0.153308	0.350567	-5.5505	NOT	CFLAR	CASP8 and FADD like apoptosis regulator [Source:HGNC Symbol;Acc:HGNC:1876]
34	ENSG00000003436	0.442572	-3.47998	1.23938	0.221564	0.431711	-5.06152	NOT	TFPI	tissue factor pathway inhibitor [Source:HGNC Symbol;Acc:HGNC:11760]
35	ENSG00000003509	0.147838	3.96407	1.11393	0.271161	0.48561	-5.86156	NOT	NDUFAF7	NADH:ubiquinone oxidoreductase complex assembly factor 7 [Source:HGNC Symbol;Acc:HGNC:28816]
36	ENSG00000003756	-0.199847	6.89398	-1.86069	0.0692611	0.227021	-4.92669	NOT	RBM5	RNA binding motif protein 5 [Source:HGNC Symbol;Acc:HGNC:9902]
37	ENSG00000003987	-0.141767	2.62829	-1.19474	0.238385	0.450408	-5.61129	NOT	MTMR7	myotubularin related protein 7 [Source:HGNC Symbol;Acc:HGNC:7454]
8661	ENSG00000159399	7.15594	4.74292	7.94164	3.9e-10	2.7e-06	12.8279	UP	HK2	hexokinase 2 [Source:HGNC Symbol;Acc:HGNC:4923]
39	ENSG00000004139	-0.31811	2.03563	-1.42669	0.1605	0.359012	-5.2504	NOT	SARM1	sterile alpha and TIR motif containing 1 [Source:HGNC Symbol;Acc:HGNC:17074]
40	ENSG00000004142	-0.317109	5.27246	-2.24724	0.0295214	0.148262	-4.17621	NOT	POLDIP2	DNA polymerase delta interacting protein 2 [Source:HGNC Symbol;Acc:HGNC:23781]
41	ENSG00000004399	-0.666811	7.01164	-4.3801	6.91e-05	0.0108026	1.40317	NOT	PLXND1	plexin D1 [Source:HGNC Symbol;Acc:HGNC:9107]
7565	ENSG00000147872	6.79316	4.4907	7.19703	4.92e-09	2.26e-05	10.4749	UP	PLIN2	perilipin 2 [Source:HGNC Symbol;Acc:HGNC:248]
43	ENSG00000004468	-0.293275	4.46318	-1.55874	0.125992	0.314588	-5.33985	NOT	CD38	CD38 molecule [Source:HGNC Symbol;Acc:HGNC:1667]
44	ENSG00000004487	-0.416661	1.13299	-1.31122	0.196365	0.403399	-5.29293	NOT	KDM1A	lysine demethylase 1A [Source:HGNC Symbol;Acc:HGNC:29079]
45	ENSG00000004534	-0.28411	7.33165	-2.31562	0.0251447	0.136602	-4.05724	NOT	RBM6	RNA binding motif protein 6 [Source:HGNC Symbol;Acc:HGNC:9903]
46	ENSG00000004660	0.89244	4.96886	3.43102	0.0012902	0.0421696	-1.32138	NOT	CAMKK1	calcium/calmodulin dependent protein kinase kinase 1 [Source:HGNC Symbol;Acc:HGNC:1469]
47	ENSG00000004700	-0.083115	4.75757	-0.388626	0.699366	0.836591	-6.47023	NOT	RECQL	RecQ like helicase [Source:HGNC Symbol;Acc:HGNC:9948]
48	ENSG00000004766	-0.144331	4.4789	-0.813417	0.420218	0.626316	-6.19579	NOT	VPS50	VPS50 subunit of EARP/GARPII complex [Source:HGNC Symbol;Acc:HGNC:25956]
49	ENSG00000004777	-0.198416	3.11913	-1.20335	0.23507	0.446577	-5.66483	NOT	ARHGAP33	Rho GTPase activating protein 33 [Source:HGNC Symbol;Acc:HGNC:23085]
50	ENSG00000004779	-0.385621	4.4816	-2.47837	0.0169739	0.114497	-3.64657	NOT	NDUFAB1	NADH:ubiquinone oxidoreductase subunit AB1 [Source:HGNC Symbol;Acc:HGNC:7694]
51	ENSG00000004799	-0.136202	3.49614	-0.286792	0.775574	0.883046	-6.37868	NOT	PDK4	pyruvate dehydrogenase kinase 4 [Source:HGNC Symbol;Acc:HGNC:8812]
52	ENSG00000004809	-0.604932	1.31806	-2.15181	0.0367579	0.164514	-3.99237	NOT	SLC22A16	solute carrier family 22 member 16 [Source:HGNC Symbol;Acc:HGNC:20302]
53	ENSG00000004838	-0.0146009	-2.86036	-0.0454356	0.963959	0.982981	-5.78548	NOT	ZMYND10	zinc finger MYND-type containing 10 [Source:HGNC Symbol;Acc:HGNC:19412]
54	ENSG00000004846	-0.0289776	-2.68606	-0.0781765	0.938031	0.971408	-5.7923	NOT	ABCB5	ATP binding cassette subfamily B member 5 [Source:HGNC Symbol;Acc:HGNC:46]
5756	ENSG00000134070	6.77384	2.40287	8.08971	2.37e-10	2.68e-06	12.979	UP	IRAK2	interleukin 1 receptor associated kinase 2 [Source:HGNC Symbol;Acc:HGNC:6113]
56	ENSG00000004866	0.0127172	2.77691	0.0794787	0.937001	0.970883	-6.32126	NOT	ST7	suppression of tumorigenicity 7 [Source:HGNC Symbol;Acc:HGNC:11351]
57	ENSG00000004897	0.0960779	5.73759	0.922618	0.361076	0.574021	-6.16695	NOT	CDC27	cell division cycle 27 [Source:HGNC Symbol;Acc:HGNC:1728]
58	ENSG00000004939	1.65801	3.73077	1.52087	0.135217	0.326699	-5.29943	NOT	SLC4A1	solute carrier family 4 member 1 (Diego blood group) [Source:HGNC Symbol;Acc:HGNC:11027]
59	ENSG00000004961	0.210555	3.48324	1.67499	0.100801	0.277648	-5.06102	NOT	HCCS	holocytochrome c synthase [Source:HGNC Symbol;Acc:HGNC:4837]
60	ENSG00000004975	-0.222248	4.84456	-1.97397	0.054478	0.200219	-4.68091	NOT	DVL2	dishevelled segment polarity protein 2 [Source:HGNC Symbol;Acc:HGNC:3086]
61	ENSG00000005001	0.399116	-0.581424	0.950854	0.346705	0.559535	-5.49636	NOT	PRSS22	serine protease 22 [Source:HGNC Symbol;Acc:HGNC:14368]
62	ENSG00000005007	-0.230245	7.17262	-1.99066	0.0525488	0.196591	-4.69381	NOT	UPF1	UPF1 RNA helicase and ATPase [Source:HGNC Symbol;Acc:HGNC:9962]
63	ENSG00000005020	-0.0475694	6.15508	-0.235406	0.814951	0.906317	-6.56943	NOT	SKAP2	src kinase associated phosphoprotein 2 [Source:HGNC Symbol;Acc:HGNC:15687]
64	ENSG00000005022	-0.43034	7.00884	-2.88296	0.0059974	0.0738871	-2.7753	NOT	SLC25A5	solute carrier family 25 member 5 [Source:HGNC Symbol;Acc:HGNC:10991]
65	ENSG00000005059	-0.208842	6.75974	-1.63707	0.108518	0.28822	-5.29403	NOT	MCUB	mitochondrial calcium uniporter dominant negative subunit beta [Source:HGNC Symbol;Acc:HGNC:26076]
66	ENSG00000005075	0.139483	5.05846	0.683423	0.497808	0.690559	-6.33083	NOT	POLR2J	RNA polymerase II subunit J [Source:HGNC Symbol;Acc:HGNC:9197]
67	ENSG00000005100	-0.516109	1.74305	-1.3592	0.180787	0.384115	-5.30483	NOT	DHX33	DEAH-box helicase 33 [Source:HGNC Symbol;Acc:HGNC:16718]
68	ENSG00000005102	-0.522505	-0.142099	-2.11285	0.0401352	0.17154	-3.94005	NOT	MEOX1	mesenchyme homeobox 1 [Source:HGNC Symbol;Acc:HGNC:7013]
69	ENSG00000005108	-0.325359	-0.848685	-0.8544	0.397362	0.607327	-5.56255	NOT	THSD7A	thrombospondin type 1 domain containing 7A [Source:HGNC Symbol;Acc:HGNC:22207]
70	ENSG00000005156	0.197592	4.75203	1.85902	0.0695026	0.227434	-4.87778	NOT	LIG3	DNA ligase 3 [Source:HGNC Symbol;Acc:HGNC:6600]
71	ENSG00000005175	0.14262	4.74956	1.23842	0.221917	0.432078	-5.78928	NOT	RPAP3	RNA polymerase II associated protein 3 [Source:HGNC Symbol;Acc:HGNC:26151]
72	ENSG00000005187	0.0217739	0.32093	0.0811859	0.93565	0.970447	-6.01067	NOT	ACSM3	acyl-CoA synthetase medium chain family member 3 [Source:HGNC Symbol;Acc:HGNC:10522]
73	ENSG00000005194	-0.31069	5.00516	-2.23167	0.0306081	0.150907	-4.19582	NOT	CIAPIN1	cytokine induced apoptosis inhibitor 1 [Source:HGNC Symbol;Acc:HGNC:28050]
74	ENSG00000005206	-0.406625	6.31353	-2.20746	0.0323685	0.155048	-4.27778	NOT	SPPL2B	signal peptide peptidase like 2B [Source:HGNC Symbol;Acc:HGNC:30627]
75	ENSG00000005238	0.0739359	6.21074	0.38451	0.702393	0.83819	-6.52383	NOT	FAM214B	family with sequence similarity 214 member B [Source:HGNC Symbol;Acc:HGNC:25666]
76	ENSG00000005243	-0.584782	0.88903	-2.25011	0.029325	0.14796	-3.76284	NOT	COPZ2	COPI coat complex subunit zeta 2 [Source:HGNC Symbol;Acc:HGNC:19356]
77	ENSG00000005249	-0.0315049	4.84283	-0.107977	0.914489	0.960322	-6.54554	NOT	PRKAR2B	protein kinase cAMP-dependent type II regulatory subunit beta [Source:HGNC Symbol;Acc:HGNC:9392]
78	ENSG00000005302	-0.256466	6.86253	-2.0054	0.0508929	0.193247	-4.6677	NOT	MSL3	MSL complex subunit 3 [Source:HGNC Symbol;Acc:HGNC:7370]
79	ENSG00000005339	-0.0487442	8.2968	-0.404753	0.687557	0.828057	-6.50662	NOT	CREBBP	CREB binding protein [Source:HGNC Symbol;Acc:HGNC:2348]
80	ENSG00000005379	-0.529297	6.38157	-2.91558	0.00549466	0.0708968	-2.69476	NOT	TSPOAP1	TSPO associated protein 1 [Source:HGNC Symbol;Acc:HGNC:16831]
81	ENSG00000005381	-0.154206	3.59207	-0.21534	0.830465	0.914521	-6.40928	NOT	MPO	myeloperoxidase [Source:HGNC Symbol;Acc:HGNC:7218]
82	ENSG00000005436	-0.0795904	2.67098	-0.403032	0.688814	0.829041	-6.23135	NOT	GCFC2	GC-rich sequence DNA-binding factor 2 [Source:HGNC Symbol;Acc:HGNC:1317]
83	ENSG00000005448	-0.178937	3.34405	-0.928369	0.358118	0.571426	-5.9764	NOT	WDR54	WD repeat domain 54 [Source:HGNC Symbol;Acc:HGNC:25770]
84	ENSG00000005469	-0.413605	3.25039	-2.13991	0.0377621	0.166464	-4.22532	NOT	CROT	carnitine O-octanoyltransferase [Source:HGNC Symbol;Acc:HGNC:2366]
85	ENSG00000005471	-0.154636	1.6098	-0.559202	0.578768	0.750702	-6.01865	NOT	ABCB4	ATP binding cassette subfamily B member 4 [Source:HGNC Symbol;Acc:HGNC:45]
86	ENSG00000005483	0.812332	7.14769	3.17831	0.00266432	0.0543942	-2.03129	NOT	KMT2E	lysine methyltransferase 2E [Source:HGNC Symbol;Acc:HGNC:18541]
87	ENSG00000005486	0.0187956	6.06813	0.105238	0.91665	0.961362	-6.59061	NOT	RHBDD2	rhomboid domain containing 2 [Source:HGNC Symbol;Acc:HGNC:23082]
88	ENSG00000005513	-0.791484	0.254074	-2.48842	0.0165587	0.113405	-3.23225	NOT	SOX8	SRY-box transcription factor 8 [Source:HGNC Symbol;Acc:HGNC:11203]
89	ENSG00000005700	-0.206599	5.3186	-1.35954	0.18068	0.384085	-5.66841	NOT	IBTK	inhibitor of Bruton tyrosine kinase [Source:HGNC Symbol;Acc:HGNC:17853]
90	ENSG00000005801	-0.358992	4.3381	-2.83044	0.00689794	0.0788848	-2.82983	NOT	ZNF195	zinc finger protein 195 [Source:HGNC Symbol;Acc:HGNC:12986]
91	ENSG00000005810	0.596198	5.29271	1.97239	0.0546641	0.200558	-4.70292	NOT	MYCBP2	MYC binding protein 2 [Source:HGNC Symbol;Acc:HGNC:23386]
92	ENSG00000005844	-0.621551	9.15718	-3.03108	0.00401296	0.0631934	-2.38845	NOT	ITGAL	integrin subunit alpha L [Source:HGNC Symbol;Acc:HGNC:6148]
93	ENSG00000005882	-0.641957	2.86696	-3.08049	0.00350149	0.0594761	-2.08426	NOT	PDK2	pyruvate dehydrogenase kinase 2 [Source:HGNC Symbol;Acc:HGNC:8810]
94	ENSG00000005884	-0.570025	1.79476	-2.72176	0.00917257	0.0876321	-2.84429	NOT	ITGA3	integrin subunit alpha 3 [Source:HGNC Symbol;Acc:HGNC:6139]
95	ENSG00000005889	0.335805	5.75915	2.41455	0.0198378	0.122564	-3.84189	NOT	ZFX	zinc finger protein X-linked [Source:HGNC Symbol;Acc:HGNC:12869]
96	ENSG00000005893	0.109701	6.83486	0.805796	0.424554	0.629796	-6.27673	NOT	LAMP2	lysosomal associated membrane protein 2 [Source:HGNC Symbol;Acc:HGNC:6501]
97	ENSG00000005961	-0.0156958	6.26837	-0.0476123	0.962234	0.982347	-6.59722	NOT	ITGA2B	integrin subunit alpha 2b [Source:HGNC Symbol;Acc:HGNC:6138]
98	ENSG00000006007	-0.191726	5.28782	-1.70934	0.0942058	0.267892	-5.15644	NOT	GDE1	glycerophosphodiester phosphodiesterase 1 [Source:HGNC Symbol;Acc:HGNC:29644]
99	ENSG00000006016	-0.0279469	-0.295365	-0.120222	0.904837	0.955806	-5.94361	NOT	CRLF1	cytokine receptor like factor 1 [Source:HGNC Symbol;Acc:HGNC:2364]
100	ENSG00000006025	-0.434561	5.88157	-1.63975	0.107958	0.287479	-5.28248	NOT	OSBPL7	oxysterol binding protein like 7 [Source:HGNC Symbol;Acc:HGNC:16387]
101	ENSG00000006062	0.0141335	5.43797	0.106205	0.915887	0.96106	-6.57526	NOT	MAP3K14	mitogen-activated protein kinase kinase kinase 14 [Source:HGNC Symbol;Acc:HGNC:6853]
102	ENSG00000006071	0.329695	-3.02969	0.941441	0.351454	0.56432	-5.37067	NOT	ABCC8	ATP binding cassette subfamily C member 8 [Source:HGNC Symbol;Acc:HGNC:59]
103	ENSG00000006116	0.321529	-2.46907	0.746697	0.45909	0.659361	-5.54648	NOT	CACNG3	calcium voltage-gated channel auxiliary subunit gamma 3 [Source:HGNC Symbol;Acc:HGNC:1407]
104	ENSG00000006118	0.854327	1.28303	2.26797	0.028128	0.144956	-3.75012	NOT	TMEM132A	transmembrane protein 132A [Source:HGNC Symbol;Acc:HGNC:31092]
105	ENSG00000006125	0.313188	5.80173	1.77204	0.0830874	0.250216	-5.06895	NOT	AP2B1	adaptor related protein complex 2 subunit beta 1 [Source:HGNC Symbol;Acc:HGNC:563]
106	ENSG00000006194	-0.136366	5.33799	-1.52512	0.134156	0.325141	-5.44053	NOT	ZNF263	zinc finger protein 263 [Source:HGNC Symbol;Acc:HGNC:13056]
107	ENSG00000006282	-0.291054	5.4902	-1.84494	0.0715643	0.23081	-4.93777	NOT	SPATA20	spermatogenesis associated 20 [Source:HGNC Symbol;Acc:HGNC:26125]
108	ENSG00000006283	-0.300533	-3.23495	-0.692851	0.491927	0.685844	-5.54979	NOT	CACNA1G	calcium voltage-gated channel subunit alpha1 G [Source:HGNC Symbol;Acc:HGNC:1394]
109	ENSG00000006327	0.291982	2.53007	0.704377	0.48479	0.68038	-6.04357	NOT	TNFRSF12A	TNF receptor superfamily member 12A [Source:HGNC Symbol;Acc:HGNC:18152]
110	ENSG00000006432	0.267459	2.91424	1.35556	0.181933	0.385364	-5.4481	NOT	MAP3K9	mitogen-activated protein kinase kinase kinase 9 [Source:HGNC Symbol;Acc:HGNC:6861]
111	ENSG00000006451	0.328101	5.02221	2.99094	0.00447933	0.0659238	-2.47709	NOT	RALA	RAS like proto-oncogene A [Source:HGNC Symbol;Acc:HGNC:9839]
112	ENSG00000006453	0.637821	0.269585	2.00273	0.0511894	0.193743	-4.15919	NOT	BAIAP2L1	BAR/IMD domain containing adaptor protein 2 like 1 [Source:HGNC Symbol;Acc:HGNC:21649]
113	ENSG00000006459	0.230343	7.08313	1.60048	0.116419	0.300202	-5.34984	NOT	KDM7A	lysine demethylase 7A [Source:HGNC Symbol;Acc:HGNC:22224]
114	ENSG00000006468	-0.263181	-2.64682	-0.724512	0.472463	0.6696	-5.55584	NOT	ETV1	ETS variant transcription factor 1 [Source:HGNC Symbol;Acc:HGNC:3490]
115	ENSG00000006530	0.0567347	4.11062	0.281048	0.779949	0.885155	-6.44934	NOT	AGK	acylglycerol kinase [Source:HGNC Symbol;Acc:HGNC:21869]
116	ENSG00000006534	-0.228976	4.99976	-1.57088	0.123144	0.309908	-5.35767	NOT	ALDH3B1	aldehyde dehydrogenase 3 family member B1 [Source:HGNC Symbol;Acc:HGNC:410]
117	ENSG00000006555	-0.340359	3.44766	-1.74141	0.0883741	0.258986	-4.95531	NOT	TTC22	tetratricopeptide repeat domain 22 [Source:HGNC Symbol;Acc:HGNC:26067]
118	ENSG00000006576	-0.0942617	5.96142	-0.634447	0.528968	0.714322	-6.39342	NOT	PHTF2	putative homeodomain transcription factor 2 [Source:HGNC Symbol;Acc:HGNC:13411]
119	ENSG00000006606	0.526873	-3.47693	1.57474	0.12225	0.308721	-4.64652	NOT	CCL26	C-C motif chemokine ligand 26 [Source:HGNC Symbol;Acc:HGNC:10625]
120	ENSG00000006607	-0.0184652	5.06662	-0.144769	0.885533	0.945295	-6.554	NOT	FARP2	FERM, ARH/RhoGEF and pleckstrin domain protein 2 [Source:HGNC Symbol;Acc:HGNC:16460]
121	ENSG00000006625	-0.186055	1.75314	-0.889614	0.378356	0.589863	-5.8054	NOT	GGCT	gamma-glutamylcyclotransferase [Source:HGNC Symbol;Acc:HGNC:21705]
122	ENSG00000006634	0.487213	4.82487	2.08933	0.0423023	0.175926	-4.46147	NOT	DBF4	DBF4 zinc finger [Source:HGNC Symbol;Acc:HGNC:17364]
123	ENSG00000006638	-0.288373	1.15636	-1.02655	0.310063	0.523943	-5.60817	NOT	TBXA2R	thromboxane A2 receptor [Source:HGNC Symbol;Acc:HGNC:11608]
5113	ENSG00000128512	6.56074	2.90699	6.57324	4.19e-08	7.9e-05	8.38052	UP	DOCK4	dedicator of cytokinesis 4 [Source:HGNC Symbol;Acc:HGNC:19192]
125	ENSG00000006695	-0.293337	3.73502	-1.90598	0.0629848	0.215766	-4.70875	NOT	COX10	cytochrome c oxidase assembly factor heme A:farnesyltransferase COX10 [Source:HGNC Symbol;Acc:HGNC:2260]
126	ENSG00000006704	0.0758269	-0.312938	0.231896	0.817659	0.90801	-5.92181	NOT	GTF2IRD1	GTF2I repeat domain containing 1 [Source:HGNC Symbol;Acc:HGNC:4661]
127	ENSG00000006712	0.300862	5.71231	1.47671	0.146645	0.341819	-5.52105	NOT	PAF1	PAF1 homolog, Paf1/RNA polymerase II complex component [Source:HGNC Symbol;Acc:HGNC:25459]
128	ENSG00000006715	0.122831	5.37288	0.798562	0.428696	0.632723	-6.26086	NOT	VPS41	VPS41 subunit of HOPS complex [Source:HGNC Symbol;Acc:HGNC:12713]
129	ENSG00000006740	-0.209614	-0.0950466	-0.676727	0.502007	0.69383	-5.75375	NOT	ARHGAP44	Rho GTPase activating protein 44 [Source:HGNC Symbol;Acc:HGNC:29096]
130	ENSG00000006744	-0.425744	5.78924	-3.34008	0.00168006	0.0462281	-1.59724	NOT	ELAC2	elaC ribonuclease Z 2 [Source:HGNC Symbol;Acc:HGNC:14198]
131	ENSG00000006747	0.124856	-1.34088	0.353322	0.72548	0.851992	-5.80971	NOT	SCIN	scinderin [Source:HGNC Symbol;Acc:HGNC:21695]
132	ENSG00000006756	-0.442773	4.00718	-2.07138	0.0440249	0.179689	-4.43498	NOT	ARSD	arylsulfatase D [Source:HGNC Symbol;Acc:HGNC:717]
133	ENSG00000006757	-0.36559	1.77412	-2.16045	0.0360441	0.162618	-4.0209	NOT	PNPLA4	patatin like phospholipase domain containing 4 [Source:HGNC Symbol;Acc:HGNC:24887]
134	ENSG00000006831	0.130212	5.95916	1.03524	0.30603	0.520251	-6.0632	NOT	ADIPOR2	adiponectin receptor 2 [Source:HGNC Symbol;Acc:HGNC:24041]
135	ENSG00000007001	0.249073	0.556365	0.750747	0.456673	0.657726	-5.7662	NOT	UPP2	uridine phosphorylase 2 [Source:HGNC Symbol;Acc:HGNC:23061]
136	ENSG00000007038	-0.323845	2.27089	-1.02854	0.309134	0.523099	-5.7449	NOT	PRSS21	serine protease 21 [Source:HGNC Symbol;Acc:HGNC:9485]
137	ENSG00000007047	0.0332352	5.98067	0.277844	0.782392	0.886765	-6.55615	NOT	MARK4	microtubule affinity regulating kinase 4 [Source:HGNC Symbol;Acc:HGNC:13538]
138	ENSG00000007062	0.503839	-1.31741	1.58706	0.119429	0.30463	-4.71586	NOT	PROM1	prominin 1 [Source:HGNC Symbol;Acc:HGNC:9454]
139	ENSG00000007080	-0.290963	5.21957	-1.51073	0.137775	0.329941	-5.45627	NOT	CCDC124	coiled-coil domain containing 124 [Source:HGNC Symbol;Acc:HGNC:25171]
140	ENSG00000007129	-0.0655596	5.44721	-0.450439	0.654534	0.805706	-6.47976	NOT	CEACAM21	CEA cell adhesion molecule 21 [Source:HGNC Symbol;Acc:HGNC:28834]
141	ENSG00000007168	0.24381	7.23923	2.43475	0.0188875	0.119984	-3.80634	NOT	PAFAH1B1	platelet activating factor acetylhydrolase 1b regulatory subunit 1 [Source:HGNC Symbol;Acc:HGNC:8574]
142	ENSG00000007171	0.0238614	-2.02851	0.0655393	0.948032	0.97567	-5.82757	NOT	NOS2	nitric oxide synthase 2 [Source:HGNC Symbol;Acc:HGNC:7873]
143	ENSG00000007174	0.028405	-0.430805	0.0691315	0.945188	0.97451	-5.93453	NOT	DNAH9	dynein axonemal heavy chain 9 [Source:HGNC Symbol;Acc:HGNC:2953]
144	ENSG00000007202	-0.362098	6.27521	-1.86536	0.0685908	0.225538	-4.91681	NOT	KIAA0100	KIAA0100 [Source:HGNC Symbol;Acc:HGNC:28960]
145	ENSG00000007237	-0.222617	7.73532	-1.53985	0.130527	0.320652	-5.43548	NOT	GAS7	growth arrest specific 7 [Source:HGNC Symbol;Acc:HGNC:4169]
146	ENSG00000007264	-0.36647	6.25666	-1.40514	0.166775	0.36726	-5.6283	NOT	MATK	megakaryocyte-associated tyrosine kinase [Source:HGNC Symbol;Acc:HGNC:6906]
147	ENSG00000007312	0.0637439	-2.06639	0.227039	0.821411	0.909683	-5.80337	NOT	CD79B	CD79b molecule [Source:HGNC Symbol;Acc:HGNC:1699]
148	ENSG00000007314	-0.0524329	-0.697413	-0.162664	0.871504	0.937669	-5.90271	NOT	SCN4A	sodium voltage-gated channel alpha subunit 4 [Source:HGNC Symbol;Acc:HGNC:10591]
149	ENSG00000007341	0.226857	3.99972	1.53314	0.13217	0.322623	-5.33199	NOT	ST7L	suppression of tumorigenicity 7 like [Source:HGNC Symbol;Acc:HGNC:18441]
20527	ENSG00000285639	6.11116	1.52603	7.06039	7.85e-09	2.71e-05	9.77862	UP	AL133259.1	novel transcript
151	ENSG00000007372	0.141922	-2.89505	0.626995	0.533798	0.718237	-5.60275	NOT	PAX6	paired box 6 [Source:HGNC Symbol;Acc:HGNC:8620]
152	ENSG00000007376	-0.582294	4.4841	-2.68048	0.0102048	0.0913707	-3.19252	NOT	RPUSD1	RNA pseudouridine synthase domain containing 1 [Source:HGNC Symbol;Acc:HGNC:14173]
153	ENSG00000007384	0.227364	-1.05892	0.849125	0.40026	0.609553	-5.5482	NOT	RHBDF1	rhomboid 5 homolog 1 [Source:HGNC Symbol;Acc:HGNC:20561]
154	ENSG00000007392	-0.147131	7.0107	-1.32454	0.191943	0.397927	-5.73602	NOT	LUC7L	LUC7 like [Source:HGNC Symbol;Acc:HGNC:6723]
155	ENSG00000007402	0.039186	3.17278	0.151284	0.880421	0.94197	-6.36571	NOT	CACNA2D2	calcium voltage-gated channel auxiliary subunit alpha2delta 2 [Source:HGNC Symbol;Acc:HGNC:1400]
156	ENSG00000007516	-0.250356	4.84009	-0.766385	0.447408	0.649833	-6.25906	NOT	BAIAP3	BAI1 associated protein 3 [Source:HGNC Symbol;Acc:HGNC:948]
157	ENSG00000007520	-0.506134	4.8328	-2.36236	0.0224968	0.130405	-3.91711	NOT	TSR3	TSR3 ribosome maturation factor [Source:HGNC Symbol;Acc:HGNC:14175]
158	ENSG00000007541	-0.295487	4.81191	-1.69401	0.0971042	0.272112	-5.15679	NOT	PIGQ	phosphatidylinositol glycan anchor biosynthesis class Q [Source:HGNC Symbol;Acc:HGNC:14135]
159	ENSG00000007545	0.543168	2.36631	2.02883	0.048355	0.189059	-4.3224	NOT	CRAMP1	cramped chromatin regulator homolog 1 [Source:HGNC Symbol;Acc:HGNC:14122]
160	ENSG00000007866	-0.0580678	-2.13326	-0.183801	0.854987	0.928601	-5.80843	NOT	TEAD3	TEA domain transcription factor 3 [Source:HGNC Symbol;Acc:HGNC:11716]
161	ENSG00000007923	-0.325894	4.76119	-2.40703	0.0202026	0.123857	-3.81895	NOT	DNAJC11	DnaJ heat shock protein family (Hsp40) member C11 [Source:HGNC Symbol;Acc:HGNC:25570]
162	ENSG00000007944	0.323724	7.0269	1.37298	0.17649	0.379381	-5.67337	NOT	MYLIP	myosin regulatory light chain interacting protein [Source:HGNC Symbol;Acc:HGNC:21155]
163	ENSG00000007952	-0.399595	-2.4494	-1.31222	0.19603	0.40291	-5.02294	NOT	NOX1	NADPH oxidase 1 [Source:HGNC Symbol;Acc:HGNC:7889]
164	ENSG00000007968	0.00208595	3.8968	0.0101942	0.991911	0.995948	-6.46609	NOT	E2F2	E2F transcription factor 2 [Source:HGNC Symbol;Acc:HGNC:3114]
165	ENSG00000008018	-0.206864	6.83277	-1.95824	0.0563538	0.203976	-4.75404	NOT	PSMB1	proteasome 20S subunit beta 1 [Source:HGNC Symbol;Acc:HGNC:9537]
2087	ENSG00000100644	5.96582	2.97633	7.1672	5.45e-09	2.26e-05	10.2769	UP	HIF1A	hypoxia inducible factor 1 subunit alpha [Source:HGNC Symbol;Acc:HGNC:4910]
12940	ENSG00000188536	5.81166	7.91269	2.87664	0.0060998	0.0744863	-2.75521	UP	HBA2	hemoglobin subunit alpha 2 [Source:HGNC Symbol;Acc:HGNC:4824]
168	ENSG00000008086	0.399698	3.42968	1.92801	0.0601122	0.210769	-4.62942	NOT	CDKL5	cyclin dependent kinase like 5 [Source:HGNC Symbol;Acc:HGNC:11411]
7609	ENSG00000148344	5.80766	1.17653	5.55348	1.39e-06	0.00110645	5.115	UP	PTGES	prostaglandin E synthase [Source:HGNC Symbol;Acc:HGNC:9599]
170	ENSG00000008128	-0.229811	1.51068	-0.750527	0.456804	0.657785	-5.88542	NOT	CDK11A	cyclin dependent kinase 11A [Source:HGNC Symbol;Acc:HGNC:1730]
171	ENSG00000008130	0.0439048	8.09544	0.261156	0.795152	0.894475	-6.55691	NOT	NADK	NAD kinase [Source:HGNC Symbol;Acc:HGNC:29831]
172	ENSG00000008226	0.250484	2.17051	1.2041	0.234783	0.446387	-5.53751	NOT	DLEC1	DLEC1 cilia and flagella associated protein [Source:HGNC Symbol;Acc:HGNC:2899]
173	ENSG00000008256	0.0998162	4.68665	0.714412	0.478624	0.674835	-6.28597	NOT	CYTH3	cytohesin 3 [Source:HGNC Symbol;Acc:HGNC:9504]
174	ENSG00000008277	0.182263	2.23621	1.01396	0.315966	0.530072	-5.74893	NOT	ADAM22	ADAM metallopeptidase domain 22 [Source:HGNC Symbol;Acc:HGNC:201]
175	ENSG00000008282	0.113957	4.87547	0.994801	0.325097	0.538374	-6.06276	NOT	SYPL1	synaptophysin like 1 [Source:HGNC Symbol;Acc:HGNC:11507]
176	ENSG00000008283	-0.398018	4.64826	-2.50291	0.0159762	0.111714	-3.60423	NOT	CYB561	cytochrome b561 [Source:HGNC Symbol;Acc:HGNC:2571]
7666	ENSG00000148926	5.66748	3.82873	5.64227	1.03e-06	0.000885527	5.49437	UP	ADM	adrenomedullin [Source:HGNC Symbol;Acc:HGNC:259]
178	ENSG00000008300	-0.0706249	2.89218	-0.37266	0.711133	0.843171	-6.27228	NOT	CELSR3	cadherin EGF LAG seven-pass G-type receptor 3 [Source:HGNC Symbol;Acc:HGNC:3230]
179	ENSG00000008311	-0.264915	1.96459	-1.28545	0.205143	0.413479	-5.42199	NOT	AASS	aminoadipate-semialdehyde synthase [Source:HGNC Symbol;Acc:HGNC:17366]
180	ENSG00000008323	0.558673	2.57951	1.6576	0.104282	0.282438	-4.97393	NOT	PLEKHG6	pleckstrin homology and RhoGEF domain containing G6 [Source:HGNC Symbol;Acc:HGNC:25562]
181	ENSG00000008382	-0.338356	3.27142	-2.03873	0.0473153	0.186505	-4.41831	NOT	MPND	MPN domain containing [Source:HGNC Symbol;Acc:HGNC:25934]
182	ENSG00000008394	0.0142098	3.25609	0.0682689	0.945871	0.974613	-6.38555	NOT	MGST1	microsomal glutathione S-transferase 1 [Source:HGNC Symbol;Acc:HGNC:7061]
10220	ENSG00000168298	5.56615	1.45357	4.51733	4.43e-05	0.00835384	2.0014	UP	H1-4	H1.4 linker histone, cluster member [Source:HGNC Symbol;Acc:HGNC:4718]
184	ENSG00000008438	0.799978	2.09909	0.957183	0.343537	0.556458	-5.77791	NOT	PGLYRP1	peptidoglycan recognition protein 1 [Source:HGNC Symbol;Acc:HGNC:8904]
185	ENSG00000008441	-0.165983	3.72931	-0.801162	0.427204	0.631666	-6.13053	NOT	NFIX	nuclear factor I X [Source:HGNC Symbol;Acc:HGNC:7788]
186	ENSG00000008513	-0.0965633	7.39489	-0.800516	0.427575	0.631924	-6.27813	NOT	ST3GAL1	ST3 beta-galactoside alpha-2,3-sialyltransferase 1 [Source:HGNC Symbol;Acc:HGNC:10862]
187	ENSG00000008516	1.30979	5.37711	1.7079	0.0944745	0.268092	-5.15161	NOT	MMP25	matrix metallopeptidase 25 [Source:HGNC Symbol;Acc:HGNC:14246]
188	ENSG00000008517	-0.7128	7.16893	-2.40556	0.0202746	0.124048	-3.86788	NOT	IL32	interleukin 32 [Source:HGNC Symbol;Acc:HGNC:16830]
189	ENSG00000008710	-0.548925	6.01678	-2.98304	0.00457692	0.0662774	-2.52443	NOT	PKD1	polycystin 1, transient receptor potential channel interacting [Source:HGNC Symbol;Acc:HGNC:9008]
190	ENSG00000008735	-0.696397	-0.478726	-2.16823	0.0354114	0.161451	-3.81731	NOT	MAPK8IP2	mitogen-activated protein kinase 8 interacting protein 2 [Source:HGNC Symbol;Acc:HGNC:6883]
191	ENSG00000008838	-0.433121	5.94598	-3.2169	0.0023892	0.0518958	-1.92591	NOT	MED24	mediator complex subunit 24 [Source:HGNC Symbol;Acc:HGNC:22963]
192	ENSG00000008853	-0.432811	1.36594	-1.75648	0.0857391	0.254321	-4.68809	NOT	RHOBTB2	Rho related BTB domain containing 2 [Source:HGNC Symbol;Acc:HGNC:18756]
193	ENSG00000008869	-0.393125	6.09528	-2.42277	0.019446	0.121699	-3.82948	NOT	HEATR5B	HEAT repeat containing 5B [Source:HGNC Symbol;Acc:HGNC:29273]
194	ENSG00000008952	0.311614	6.33307	2.54861	0.0142592	0.106288	-3.55667	NOT	SEC62	SEC62 homolog, preprotein translocation factor [Source:HGNC Symbol;Acc:HGNC:11846]
195	ENSG00000008988	-0.287983	9.57671	-1.54307	0.129744	0.319393	-5.40633	NOT	RPS20	ribosomal protein S20 [Source:HGNC Symbol;Acc:HGNC:10405]
196	ENSG00000009307	-0.0725833	8.87131	-0.569879	0.571565	0.745842	-6.41859	NOT	CSDE1	cold shock domain containing E1 [Source:HGNC Symbol;Acc:HGNC:29905]
197	ENSG00000009335	-0.395927	6.38922	-2.91365	0.0055233	0.0711335	-2.69994	NOT	UBE3C	ubiquitin protein ligase E3C [Source:HGNC Symbol;Acc:HGNC:16803]
198	ENSG00000009413	0.129543	5.66136	0.89069	0.377784	0.589713	-6.19347	NOT	REV3L	REV3 like, DNA directed polymerase zeta catalytic subunit [Source:HGNC Symbol;Acc:HGNC:9968]
199	ENSG00000009694	-0.0880403	2.1477	-0.380109	0.705634	0.839871	-6.16982	NOT	TENM1	teneurin transmembrane protein 1 [Source:HGNC Symbol;Acc:HGNC:8117]
200	ENSG00000009724	0.491536	-1.51211	1.34399	0.185618	0.38985	-5.02496	NOT	MASP2	mannan binding lectin serine peptidase 2 [Source:HGNC Symbol;Acc:HGNC:6902]
201	ENSG00000009780	0.1492	4.13874	1.67143	0.101506	0.278309	-5.13754	NOT	FAM76A	family with sequence similarity 76 member A [Source:HGNC Symbol;Acc:HGNC:28530]
202	ENSG00000009790	-0.301397	7.70847	-1.56529	0.124448	0.311866	-5.39799	NOT	TRAF3IP3	TRAF3 interacting protein 3 [Source:HGNC Symbol;Acc:HGNC:30766]
203	ENSG00000009830	-0.124875	3.30962	-1.15686	0.253369	0.46657	-5.74057	NOT	POMT2	protein O-mannosyltransferase 2 [Source:HGNC Symbol;Acc:HGNC:19743]
204	ENSG00000009844	0.180499	4.88639	1.89289	0.0647477	0.218982	-4.8274	NOT	VTA1	vesicle trafficking 1 [Source:HGNC Symbol;Acc:HGNC:20954]
14523	ENSG00000214193	5.54688	1.46149	6.53953	4.71e-08	8.13e-05	8.18255	UP	SH3D21	SH3 domain containing 21 [Source:HGNC Symbol;Acc:HGNC:26236]
206	ENSG00000009954	-0.0724025	6.13331	-0.715571	0.477914	0.674098	-6.34151	NOT	BAZ1B	bromodomain adjacent to zinc finger domain 1B [Source:HGNC Symbol;Acc:HGNC:961]
207	ENSG00000010017	0.548798	5.26035	2.64982	0.0110394	0.0948415	-3.30351	NOT	RANBP9	RAN binding protein 9 [Source:HGNC Symbol;Acc:HGNC:13727]
208	ENSG00000010030	0.360663	2.23436	0.958854	0.342703	0.555499	-5.79802	NOT	ETV7	ETS variant transcription factor 7 [Source:HGNC Symbol;Acc:HGNC:18160]
209	ENSG00000010072	0.371745	3.36242	1.83928	0.0724087	0.232737	-4.77634	NOT	SPRTN	SprT-like N-terminal domain [Source:HGNC Symbol;Acc:HGNC:25356]
210	ENSG00000010165	-0.297312	3.23582	-1.1861	0.241745	0.454247	-5.69972	NOT	EEF1AKNMT	eEF1A lysine and N-terminal methyltransferase [Source:HGNC Symbol;Acc:HGNC:24248]
211	ENSG00000010219	-0.426208	-0.1496	-1.6766	0.100483	0.277482	-4.66705	NOT	DYRK4	dual specificity tyrosine phosphorylation regulated kinase 4 [Source:HGNC Symbol;Acc:HGNC:3095]
212	ENSG00000010244	-0.147287	7.76368	-1.3361	0.188164	0.393257	-5.71619	NOT	ZNF207	zinc finger protein 207 [Source:HGNC Symbol;Acc:HGNC:12998]
213	ENSG00000010256	-0.439985	6.45871	-2.65521	0.0108884	0.0944456	-3.31494	NOT	UQCRC1	ubiquinol-cytochrome c reductase core protein 1 [Source:HGNC Symbol;Acc:HGNC:12585]
214	ENSG00000010270	0.240763	4.97648	2.10374	0.0409631	0.173217	-4.44483	NOT	STARD3NL	STARD3 N-terminal like [Source:HGNC Symbol;Acc:HGNC:19169]
215	ENSG00000010278	0.0697478	4.82801	0.347406	0.729889	0.854919	-6.48972	NOT	CD9	CD9 molecule [Source:HGNC Symbol;Acc:HGNC:1709]
216	ENSG00000010292	-0.452235	5.36878	-2.4579	0.0178489	0.116551	-3.73748	NOT	NCAPD2	non-SMC condensin I complex subunit D2 [Source:HGNC Symbol;Acc:HGNC:24305]
217	ENSG00000010295	-0.573394	6.49867	-2.86567	0.00628111	0.0756288	-2.81702	NOT	IFFO1	intermediate filament family orphan 1 [Source:HGNC Symbol;Acc:HGNC:24970]
218	ENSG00000010310	-0.371237	3.57354	-1.12009	0.268558	0.482972	-5.81442	NOT	GIPR	gastric inhibitory polypeptide receptor [Source:HGNC Symbol;Acc:HGNC:4271]
219	ENSG00000010318	-0.400257	3.97904	-3.66442	0.000645564	0.0320803	-0.623171	NOT	PHF7	PHD finger protein 7 [Source:HGNC Symbol;Acc:HGNC:18458]
20192	ENSG00000280441	5.41672	0.838583	5.69877	8.46e-07	0.000796477	5.54488	UP	FP236383.3	novel transcript
221	ENSG00000010322	-0.458171	7.56741	-3.20681	0.00245846	0.0523213	-1.95402	NOT	NISCH	nischarin [Source:HGNC Symbol;Acc:HGNC:18006]
222	ENSG00000010327	-0.608713	7.73144	-2.92702	0.00532773	0.0699763	-2.66301	NOT	STAB1	stabilin 1 [Source:HGNC Symbol;Acc:HGNC:18628]
223	ENSG00000010361	0.0836725	3.86909	0.413327	0.68131	0.824174	-6.37718	NOT	FUZ	fuzzy planar cell polarity protein [Source:HGNC Symbol;Acc:HGNC:26219]
224	ENSG00000010379	-0.288217	-0.774203	-1.11239	0.271818	0.486153	-5.33283	NOT	SLC6A13	solute carrier family 6 member 13 [Source:HGNC Symbol;Acc:HGNC:11046]
225	ENSG00000010438	0.332737	-1.14505	1.14025	0.260153	0.473674	-5.27536	NOT	PRSS3	serine protease 3 [Source:HGNC Symbol;Acc:HGNC:9486]
226	ENSG00000010539	0.199479	1.59926	0.781156	0.438759	0.642269	-5.86895	NOT	ZNF200	zinc finger protein 200 [Source:HGNC Symbol;Acc:HGNC:12993]
227	ENSG00000010610	-0.853028	7.70937	-3.30254	0.00187164	0.0485636	-1.69987	NOT	CD4	CD4 molecule [Source:HGNC Symbol;Acc:HGNC:1678]
228	ENSG00000010626	0.105693	3.32883	1.05686	0.296159	0.511062	-5.84804	NOT	LRRC23	leucine rich repeat containing 23 [Source:HGNC Symbol;Acc:HGNC:19138]
229	ENSG00000010671	-0.353253	6.26431	-1.91446	0.061866	0.213807	-4.83055	NOT	BTK	Bruton tyrosine kinase [Source:HGNC Symbol;Acc:HGNC:1133]
230	ENSG00000010704	-0.575795	2.52872	-2.47025	0.0173163	0.115046	-3.47353	NOT	HFE	homeostatic iron regulator [Source:HGNC Symbol;Acc:HGNC:4886]
231	ENSG00000010803	0.254998	3.80367	1.13088	0.264036	0.477847	-5.82441	NOT	SCMH1	Scm polycomb group protein homolog 1 [Source:HGNC Symbol;Acc:HGNC:19003]
232	ENSG00000010810	-0.145097	8.55196	-0.569277	0.57197	0.746229	-6.42329	NOT	FYN	FYN proto-oncogene, Src family tyrosine kinase [Source:HGNC Symbol;Acc:HGNC:4037]
233	ENSG00000010818	0.78026	5.88358	2.88755	0.0059242	0.0732903	-2.75716	NOT	HIVEP2	HIVEP zinc finger 2 [Source:HGNC Symbol;Acc:HGNC:4921]
234	ENSG00000010932	-0.025357	-3.0125	-0.0966389	0.923438	0.964554	-5.77483	NOT	FMO1	flavin containing dimethylaniline monoxygenase 1 [Source:HGNC Symbol;Acc:HGNC:3769]
235	ENSG00000011007	-0.188877	4.87933	-2.04656	0.0465074	0.185012	-4.54898	NOT	ELOA	elongin A [Source:HGNC Symbol;Acc:HGNC:11620]
236	ENSG00000011009	-0.222281	5.86097	-1.31828	0.194012	0.400401	-5.73723	NOT	LYPLA2	lysophospholipase 2 [Source:HGNC Symbol;Acc:HGNC:6738]
237	ENSG00000011021	-0.0766054	5.8404	-0.602861	0.549596	0.730188	-6.41064	NOT	CLCN6	chloride voltage-gated channel 6 [Source:HGNC Symbol;Acc:HGNC:2024]
238	ENSG00000011028	-0.206926	2.19962	-0.928001	0.358307	0.571535	-5.82951	NOT	MRC2	mannose receptor C type 2 [Source:HGNC Symbol;Acc:HGNC:16875]
239	ENSG00000011052	-0.608922	-1.94086	-1.70406	0.0951947	0.26919	-4.52267	NOT	NME1-NME2	NME1-NME2 readthrough [Source:HGNC Symbol;Acc:HGNC:33531]
240	ENSG00000011083	-0.0214764	-3.01423	-0.0543938	0.95686	0.979943	-5.77776	NOT	SLC6A7	solute carrier family 6 member 7 [Source:HGNC Symbol;Acc:HGNC:11054]
241	ENSG00000011105	-0.0223343	2.21959	-0.0790964	0.937303	0.971043	-6.2468	NOT	TSPAN9	tetraspanin 9 [Source:HGNC Symbol;Acc:HGNC:21640]
242	ENSG00000011114	0.134674	5.36995	1.41525	0.163807	0.363543	-5.59594	NOT	BTBD7	BTB domain containing 7 [Source:HGNC Symbol;Acc:HGNC:18269]
243	ENSG00000011132	0.00686732	5.2974	0.0426005	0.966207	0.984431	-6.57453	NOT	APBA3	amyloid beta precursor protein binding family A member 3 [Source:HGNC Symbol;Acc:HGNC:580]
244	ENSG00000011143	-0.48161	2.12317	-2.11064	0.0403343	0.171694	-4.15412	NOT	MKS1	MKS transition zone complex subunit 1 [Source:HGNC Symbol;Acc:HGNC:7121]
245	ENSG00000011198	0.44039	6.08158	1.9793	0.0538555	0.198859	-4.71212	NOT	ABHD5	abhydrolase domain containing 5 [Source:HGNC Symbol;Acc:HGNC:21396]
246	ENSG00000011201	0.24381	-1.83982	0.799018	0.428434	0.632597	-5.54204	NOT	ANOS1	anosmin 1 [Source:HGNC Symbol;Acc:HGNC:6211]
247	ENSG00000011243	-0.306063	6.45526	-2.70474	0.00958587	0.0891929	-3.20054	NOT	AKAP8L	A-kinase anchoring protein 8 like [Source:HGNC Symbol;Acc:HGNC:29857]
248	ENSG00000011258	-0.0220547	5.41326	-0.196019	0.845469	0.922677	-6.56077	NOT	MBTD1	mbt domain containing 1 [Source:HGNC Symbol;Acc:HGNC:19866]
249	ENSG00000011260	0.00363733	5.59867	0.0474242	0.962383	0.982389	-6.58503	NOT	UTP18	UTP18 small subunit processome component [Source:HGNC Symbol;Acc:HGNC:24274]
250	ENSG00000011275	-0.147281	7.14318	-1.31748	0.194276	0.400815	-5.74446	NOT	RNF216	ring finger protein 216 [Source:HGNC Symbol;Acc:HGNC:21698]
251	ENSG00000011295	0.08883	5.7052	0.899792	0.372971	0.58501	-6.18664	NOT	TTC19	tetratricopeptide repeat domain 19 [Source:HGNC Symbol;Acc:HGNC:26006]
252	ENSG00000011304	-0.513125	7.87194	-3.07126	0.00359216	0.0600633	-2.30109	NOT	PTBP1	polypyrimidine tract binding protein 1 [Source:HGNC Symbol;Acc:HGNC:9583]
253	ENSG00000011332	0.0818036	-0.835375	0.314998	0.754204	0.870093	-5.85602	NOT	DPF1	double PHD fingers 1 [Source:HGNC Symbol;Acc:HGNC:20225]
254	ENSG00000011376	0.139484	3.89187	0.911775	0.366696	0.579022	-6.05321	NOT	LARS2	leucyl-tRNA synthetase 2, mitochondrial [Source:HGNC Symbol;Acc:HGNC:17095]
255	ENSG00000011405	0.477713	5.62497	2.40837	0.0201371	0.123675	-3.85135	NOT	PIK3C2A	phosphatidylinositol-4-phosphate 3-kinase catalytic subunit type 2 alpha [Source:HGNC Symbol;Acc:HGNC:8971]
15305	ENSG00000227591	5.26646	2.03983	5.16765	5.13e-06	0.00252664	3.96975	UP	HSD11B1-AS1	HSD11B1 antisense RNA 1 [Source:HGNC Symbol;Acc:HGNC:54053]
13265	ENSG00000196878	5.24347	1.40036	5.37442	2.55e-06	0.00164152	4.58233	UP	LAMB3	laminin subunit beta 3 [Source:HGNC Symbol;Acc:HGNC:6490]
258	ENSG00000011451	-0.403998	5.46527	-3.28498	0.00196823	0.0489804	-1.7369	NOT	WIZ	WIZ zinc finger [Source:HGNC Symbol;Acc:HGNC:30917]
259	ENSG00000011454	0.0754401	5.56557	0.666128	0.508695	0.698878	-6.3637	NOT	RABGAP1	RAB GTPase activating protein 1 [Source:HGNC Symbol;Acc:HGNC:17155]
260	ENSG00000011465	0.64497	-2.25689	1.43593	0.157865	0.356232	-4.87539	NOT	DCN	decorin [Source:HGNC Symbol;Acc:HGNC:2705]
261	ENSG00000011478	-0.0141266	3.50662	-0.0844674	0.933056	0.96921	-6.41606	NOT	QPCTL	glutaminyl-peptide cyclotransferase like [Source:HGNC Symbol;Acc:HGNC:25952]
262	ENSG00000011485	-0.519932	5.1961	-3.18095	0.0026446	0.0540447	-2.00073	NOT	PPP5C	protein phosphatase 5 catalytic subunit [Source:HGNC Symbol;Acc:HGNC:9322]
263	ENSG00000011523	0.383705	3.26098	1.9177	0.0614431	0.213144	-4.62897	NOT	CEP68	centrosomal protein 68 [Source:HGNC Symbol;Acc:HGNC:29076]
264	ENSG00000011566	0.293353	4.41458	1.26582	0.212023	0.420945	-5.72889	NOT	MAP4K3	mitogen-activated protein kinase kinase kinase kinase 3 [Source:HGNC Symbol;Acc:HGNC:6865]
265	ENSG00000011590	-0.245419	1.82209	-1.09938	0.27739	0.491722	-5.61456	NOT	ZBTB32	zinc finger and BTB domain containing 32 [Source:HGNC Symbol;Acc:HGNC:16763]
266	ENSG00000011600	-0.226277	8.77193	-1.09255	0.280346	0.494411	-5.99137	NOT	TYROBP	transmembrane immune signaling adaptor TYROBP [Source:HGNC Symbol;Acc:HGNC:12449]
267	ENSG00000011638	-0.0703862	3.04081	-0.587327	0.559889	0.73748	-6.19011	NOT	TMEM159	transmembrane protein 159 [Source:HGNC Symbol;Acc:HGNC:30136]
268	ENSG00000011677	0.239716	-3.27575	0.511413	0.611536	0.776296	-5.64553	NOT	GABRA3	gamma-aminobutyric acid type A receptor subunit alpha3 [Source:HGNC Symbol;Acc:HGNC:4077]
269	ENSG00000012048	-0.0838818	2.23701	-0.37462	0.709685	0.842273	-6.18361	NOT	BRCA1	BRCA1 DNA repair associated [Source:HGNC Symbol;Acc:HGNC:1100]
270	ENSG00000012061	0.169442	5.39841	1.21349	0.231207	0.442471	-5.85282	NOT	ERCC1	ERCC excision repair 1, endonuclease non-catalytic subunit [Source:HGNC Symbol;Acc:HGNC:3433]
271	ENSG00000012124	-0.182155	5.76636	-0.62549	0.534776	0.718793	-6.39506	NOT	CD22	CD22 molecule [Source:HGNC Symbol;Acc:HGNC:1643]
272	ENSG00000012171	0.876499	1.27192	1.7831	0.0812463	0.247186	-4.62056	NOT	SEMA3B	semaphorin 3B [Source:HGNC Symbol;Acc:HGNC:10724]
273	ENSG00000012174	-0.206468	2.62464	-1.03696	0.305238	0.519719	-5.78111	NOT	MBTPS2	membrane bound transcription factor peptidase, site 2 [Source:HGNC Symbol;Acc:HGNC:15455]
274	ENSG00000012211	-0.0490358	3.02057	-0.320777	0.749849	0.867387	-6.30628	NOT	PRICKLE3	prickle planar cell polarity protein 3 [Source:HGNC Symbol;Acc:HGNC:6645]
275	ENSG00000012223	1.45793	5.57685	1.04975	0.299381	0.514238	-6.02922	NOT	LTF	lactotransferrin [Source:HGNC Symbol;Acc:HGNC:6720]
276	ENSG00000012232	-0.229812	5.56271	-1.3145	0.195268	0.401862	-5.7348	NOT	EXTL3	exostosin like glycosyltransferase 3 [Source:HGNC Symbol;Acc:HGNC:3518]
277	ENSG00000012504	0.629115	-3.58745	1.5518	0.127642	0.31661	-4.674	NOT	NR1H4	nuclear receptor subfamily 1 group H member 4 [Source:HGNC Symbol;Acc:HGNC:7967]
278	ENSG00000012660	0.603612	7.63104	3.83873	0.00038001	0.0250639	-0.21082	NOT	ELOVL5	ELOVL fatty acid elongase 5 [Source:HGNC Symbol;Acc:HGNC:21308]
279	ENSG00000012779	-0.28586	8.24356	-1.5442	0.129472	0.319206	-5.42384	NOT	ALOX5	arachidonate 5-lipoxygenase [Source:HGNC Symbol;Acc:HGNC:435]
280	ENSG00000012817	-0.529945	4.92326	-0.554129	0.582206	0.753128	-6.40215	NOT	KDM5D	lysine demethylase 5D [Source:HGNC Symbol;Acc:HGNC:11115]
281	ENSG00000012822	-0.357046	7.06682	-2.52245	0.01522	0.109739	-3.61473	NOT	CALCOCO1	calcium binding and coiled-coil domain 1 [Source:HGNC Symbol;Acc:HGNC:29306]
282	ENSG00000012963	-0.273904	3.86305	-1.88706	0.0655452	0.220565	-4.7552	NOT	UBR7	ubiquitin protein ligase E3 component n-recognin 7 [Source:HGNC Symbol;Acc:HGNC:20344]
283	ENSG00000012983	0.164435	5.43066	1.15106	0.255724	0.469116	-5.92583	NOT	MAP4K5	mitogen-activated protein kinase kinase kinase kinase 5 [Source:HGNC Symbol;Acc:HGNC:6867]
284	ENSG00000013016	-0.308622	3.416	-1.598	0.11697	0.301099	-5.17578	NOT	EHD3	EH domain containing 3 [Source:HGNC Symbol;Acc:HGNC:3244]
285	ENSG00000013275	0.232762	5.9206	1.49076	0.14293	0.336892	-5.50575	NOT	PSMC4	proteasome 26S subunit, ATPase 4 [Source:HGNC Symbol;Acc:HGNC:9551]
286	ENSG00000013288	-0.417888	6.39399	-3.18717	0.00259859	0.0537752	-2.00767	NOT	MAN2B2	mannosidase alpha class 2B member 2 [Source:HGNC Symbol;Acc:HGNC:29623]
287	ENSG00000013306	-0.278155	7.42095	-0.584367	0.561861	0.738622	-6.42622	NOT	SLC25A39	solute carrier family 25 member 39 [Source:HGNC Symbol;Acc:HGNC:24279]
288	ENSG00000013364	-0.569663	8.14371	-2.62242	0.0118378	0.0982202	-3.38196	NOT	MVP	major vault protein [Source:HGNC Symbol;Acc:HGNC:7531]
289	ENSG00000013374	0.197633	6.48885	2.13113	0.0385182	0.16828	-4.42984	NOT	NUB1	negative regulator of ubiquitin like proteins 1 [Source:HGNC Symbol;Acc:HGNC:17623]
290	ENSG00000013375	-0.0353144	2.70841	-0.155759	0.876912	0.939915	-6.3041	NOT	PGM3	phosphoglucomutase 3 [Source:HGNC Symbol;Acc:HGNC:8907]
291	ENSG00000013392	-0.776549	1.46883	-3.51851	0.000997674	0.0383875	-0.839093	NOT	RWDD2A	RWD domain containing 2A [Source:HGNC Symbol;Acc:HGNC:21385]
292	ENSG00000013441	0.295155	8.75293	1.77551	0.0825068	0.249141	-5.05581	NOT	CLK1	CDC like kinase 1 [Source:HGNC Symbol;Acc:HGNC:2068]
293	ENSG00000013503	-0.0456471	2.21175	-0.227473	0.821075	0.909419	-6.2232	NOT	POLR3B	RNA polymerase III subunit B [Source:HGNC Symbol;Acc:HGNC:30348]
294	ENSG00000013523	-0.392739	4.17259	-2.39584	0.0207565	0.125491	-3.79951	NOT	ANGEL1	angel homolog 1 [Source:HGNC Symbol;Acc:HGNC:19961]
295	ENSG00000013561	-0.211452	2.74794	-1.34114	0.186534	0.391034	-5.45055	NOT	RNF14	ring finger protein 14 [Source:HGNC Symbol;Acc:HGNC:10058]
296	ENSG00000013563	-0.278236	2.18685	-1.64856	0.106131	0.28473	-4.95	NOT	DNASE1L1	deoxyribonuclease 1 like 1 [Source:HGNC Symbol;Acc:HGNC:2957]
297	ENSG00000013573	0.193266	3.68811	0.774357	0.442727	0.64557	-6.14368	NOT	DDX11	DEAD/H-box helicase 11 [Source:HGNC Symbol;Acc:HGNC:2736]
298	ENSG00000013583	-0.0182846	3.37429	-0.134821	0.893349	0.94974	-6.3942	NOT	HEBP1	heme binding protein 1 [Source:HGNC Symbol;Acc:HGNC:17176]
8783	ENSG00000160460	5.17266	0.552878	6.88394	1.44e-08	3.73e-05	9.14706	UP	SPTBN4	spectrin beta, non-erythrocytic 4 [Source:HGNC Symbol;Acc:HGNC:14896]
300	ENSG00000013619	-0.0427551	1.19366	-0.15633	0.876465	0.939873	-6.10368	NOT	MAMLD1	mastermind like domain containing 1 [Source:HGNC Symbol;Acc:HGNC:2568]
301	ENSG00000013725	-0.365794	8.09178	-1.52367	0.134516	0.325674	-5.45538	NOT	CD6	CD6 molecule [Source:HGNC Symbol;Acc:HGNC:1691]
302	ENSG00000013810	-0.301106	7.02337	-1.8014	0.0782722	0.241966	-5.02746	NOT	TACC3	transforming acidic coiled-coil containing protein 3 [Source:HGNC Symbol;Acc:HGNC:11524]
303	ENSG00000014123	0.0373058	5.10127	0.199468	0.842786	0.921417	-6.54634	NOT	UFL1	UFM1 specific ligase 1 [Source:HGNC Symbol;Acc:HGNC:23039]
304	ENSG00000014164	0.0193923	6.38682	0.178727	0.858946	0.930963	-6.58324	NOT	ZC3H3	zinc finger CCCH-type containing 3 [Source:HGNC Symbol;Acc:HGNC:28972]
305	ENSG00000014216	-0.590267	7.21361	-3.24343	0.00221595	0.0504603	-1.85971	NOT	CAPN1	calpain 1 [Source:HGNC Symbol;Acc:HGNC:1476]
306	ENSG00000014257	0.167415	3.42753	0.656582	0.514759	0.703944	-6.19491	NOT	ACP3	acid phosphatase 3 [Source:HGNC Symbol;Acc:HGNC:125]
307	ENSG00000014824	-0.12338	5.2388	-1.01086	0.31743	0.531195	-6.06659	NOT	SLC30A9	solute carrier family 30 member 9 [Source:HGNC Symbol;Acc:HGNC:1329]
308	ENSG00000014914	-0.276894	4.27267	-1.45457	0.152658	0.350155	-5.47299	NOT	MTMR11	myotubularin related protein 11 [Source:HGNC Symbol;Acc:HGNC:24307]
309	ENSG00000015133	-0.464892	8.11842	-2.54661	0.0143307	0.106493	-3.55332	NOT	CCDC88C	coiled-coil domain containing 88C [Source:HGNC Symbol;Acc:HGNC:19967]
310	ENSG00000015153	0.54317	5.46822	2.78902	0.00769497	0.0817719	-2.98564	NOT	YAF2	YY1 associated factor 2 [Source:HGNC Symbol;Acc:HGNC:17363]
311	ENSG00000015171	-0.342824	5.40698	-1.9709	0.0548397	0.200953	-4.71211	NOT	ZMYND11	zinc finger MYND-type containing 11 [Source:HGNC Symbol;Acc:HGNC:16966]
312	ENSG00000015285	-0.351656	8.03431	-1.83571	0.072945	0.233392	-4.96176	NOT	WAS	WASP actin nucleation promoting factor [Source:HGNC Symbol;Acc:HGNC:12731]
313	ENSG00000015475	0.6823	7.38078	2.87278	0.00616297	0.0747356	-2.79933	NOT	BID	BH3 interacting domain death agonist [Source:HGNC Symbol;Acc:HGNC:1050]
314	ENSG00000015520	0.779423	-1.90211	2.02681	0.0485697	0.189363	-3.99878	NOT	NPC1L1	NPC1 like intracellular cholesterol transporter 1 [Source:HGNC Symbol;Acc:HGNC:7898]
315	ENSG00000015532	-0.37159	4.96983	-2.54474	0.0143977	0.106859	-3.53022	NOT	XYLT2	xylosyltransferase 2 [Source:HGNC Symbol;Acc:HGNC:15517]
4241	ENSG00000119508	4.84487	2.11082	5.72532	7.72e-07	0.000762006	5.70894	UP	NR4A3	nuclear receptor subfamily 4 group A member 3 [Source:HGNC Symbol;Acc:HGNC:7982]
317	ENSG00000015592	0.429826	-2.83781	1.4879	0.143681	0.337683	-4.78521	NOT	STMN4	stathmin 4 [Source:HGNC Symbol;Acc:HGNC:16078]
318	ENSG00000015676	-0.356008	5.87561	-2.78714	0.00773299	0.0818991	-3.00063	NOT	NUDCD3	NudC domain containing 3 [Source:HGNC Symbol;Acc:HGNC:22208]
319	ENSG00000016391	-0.60691	-0.120285	-2.06122	0.0450272	0.181749	-4.03571	NOT	CHDH	choline dehydrogenase [Source:HGNC Symbol;Acc:HGNC:24288]
320	ENSG00000016864	-0.429548	4.12909	-2.24756	0.0294998	0.148262	-4.10235	NOT	GLT8D1	glycosyltransferase 8 domain containing 1 [Source:HGNC Symbol;Acc:HGNC:24870]
321	ENSG00000017260	-0.0118626	5.77961	-0.092336	0.926837	0.965946	-6.58661	NOT	ATP2C1	ATPase secretory pathway Ca2+ transporting 1 [Source:HGNC Symbol;Acc:HGNC:13211]
322	ENSG00000017483	-0.296012	4.12937	-1.09628	0.27873	0.49303	-5.89983	NOT	SLC38A5	solute carrier family 38 member 5 [Source:HGNC Symbol;Acc:HGNC:18070]
323	ENSG00000017797	-0.223991	5.77389	-1.3283	0.190709	0.39635	-5.72267	NOT	RALBP1	ralA binding protein 1 [Source:HGNC Symbol;Acc:HGNC:9841]
324	ENSG00000018189	-0.147053	5.94512	-1.12075	0.268279	0.482744	-5.97273	NOT	RUFY3	RUN and FYVE domain containing 3 [Source:HGNC Symbol;Acc:HGNC:30285]
325	ENSG00000018236	0.873229	-2.70012	1.69801	0.0963405	0.270988	-4.49616	NOT	CNTN1	contactin 1 [Source:HGNC Symbol;Acc:HGNC:2171]
326	ENSG00000018280	-0.118539	9.27501	-0.504415	0.616405	0.779468	-6.4472	NOT	SLC11A1	solute carrier family 11 member 1 [Source:HGNC Symbol;Acc:HGNC:10907]
327	ENSG00000018408	0.0392404	1.00231	0.178292	0.859285	0.931199	-6.07615	NOT	WWTR1	WW domain containing transcription regulator 1 [Source:HGNC Symbol;Acc:HGNC:24042]
328	ENSG00000018510	-0.0222011	5.22386	-0.165738	0.869098	0.936175	-6.5585	NOT	AGPS	alkylglycerone phosphate synthase [Source:HGNC Symbol;Acc:HGNC:327]
329	ENSG00000018610	0.172778	4.35116	1.14131	0.259715	0.473272	-5.86945	NOT	CXorf56	chromosome X open reading frame 56 [Source:HGNC Symbol;Acc:HGNC:26239]
330	ENSG00000018625	0.150257	-3.2114	0.450201	0.654705	0.805774	-5.6758	NOT	ATP1A2	ATPase Na+/K+ transporting subunit alpha 2 [Source:HGNC Symbol;Acc:HGNC:800]
331	ENSG00000018699	-0.15516	4.05948	-1.21445	0.230844	0.44212	-5.76008	NOT	TTC27	tetratricopeptide repeat domain 27 [Source:HGNC Symbol;Acc:HGNC:25986]
332	ENSG00000018869	-0.257663	0.0259412	-0.927061	0.35879	0.57192	-5.57759	NOT	ZNF582	zinc finger protein 582 [Source:HGNC Symbol;Acc:HGNC:26421]
333	ENSG00000019102	-0.129519	3.79452	-0.51574	0.608534	0.774237	-6.32322	NOT	VSIG2	V-set and immunoglobulin domain containing 2 [Source:HGNC Symbol;Acc:HGNC:17149]
334	ENSG00000019144	-0.212121	0.348077	-0.834054	0.408611	0.61687	-5.68682	NOT	PHLDB1	pleckstrin homology like domain family B member 1 [Source:HGNC Symbol;Acc:HGNC:23697]
335	ENSG00000019169	0.00715736	3.51557	0.0194864	0.984538	0.992688	-6.42094	NOT	MARCO	macrophage receptor with collagenous structure [Source:HGNC Symbol;Acc:HGNC:6895]
336	ENSG00000019186	-0.592556	-2.93733	-1.39556	0.169625	0.370542	-4.90316	NOT	CYP24A1	cytochrome P450 family 24 subfamily A member 1 [Source:HGNC Symbol;Acc:HGNC:2602]
337	ENSG00000019485	-0.181382	2.41436	-1.01224	0.31678	0.530793	-5.77806	NOT	PRDM11	PR/SET domain 11 [Source:HGNC Symbol;Acc:HGNC:13996]
338	ENSG00000019582	-0.676383	11.4027	-3.004	0.00432234	0.0649511	-2.41926	NOT	CD74	CD74 molecule [Source:HGNC Symbol;Acc:HGNC:1697]
339	ENSG00000019991	-0.305547	2.60991	-1.02226	0.312065	0.525952	-5.79432	NOT	HGF	hepatocyte growth factor [Source:HGNC Symbol;Acc:HGNC:4893]
340	ENSG00000019995	0.670844	4.25013	3.19816	0.00251928	0.0529995	-1.89735	NOT	ZRANB1	zinc finger RANBP2-type containing 1 [Source:HGNC Symbol;Acc:HGNC:18224]
341	ENSG00000020129	-0.54611	3.70438	-2.5913	0.0128089	0.101696	-3.33014	NOT	NCDN	neurochondrin [Source:HGNC Symbol;Acc:HGNC:17597]
342	ENSG00000020181	-0.375731	2.43176	-1.54514	0.129244	0.319023	-5.13445	NOT	ADGRA2	adhesion G protein-coupled receptor A2 [Source:HGNC Symbol;Acc:HGNC:17849]
343	ENSG00000020256	-0.299633	3.324	-1.90155	0.0635766	0.217014	-4.67107	NOT	ZFP64	ZFP64 zinc finger protein [Source:HGNC Symbol;Acc:HGNC:15940]
344	ENSG00000020426	0.356333	2.87201	1.3215	0.192946	0.398992	-5.48463	NOT	MNAT1	MNAT1 component of CDK activating kinase [Source:HGNC Symbol;Acc:HGNC:7181]
345	ENSG00000020577	-0.126943	4.17285	-0.695005	0.490589	0.684769	-6.25608	NOT	SAMD4A	sterile alpha motif domain containing 4A [Source:HGNC Symbol;Acc:HGNC:23023]
346	ENSG00000020633	-0.254021	9.01476	-1.14015	0.260192	0.473693	-5.93592	NOT	RUNX3	RUNX family transcription factor 3 [Source:HGNC Symbol;Acc:HGNC:10473]
347	ENSG00000020922	-0.0852781	5.54998	-0.72827	0.470182	0.668162	-6.32031	NOT	MRE11	MRE11 homolog, double strand break repair nuclease [Source:HGNC Symbol;Acc:HGNC:7230]
348	ENSG00000021300	-0.472119	3.47943	-1.95589	0.0566377	0.204245	-4.59308	NOT	PLEKHB1	pleckstrin homology domain containing B1 [Source:HGNC Symbol;Acc:HGNC:19079]
349	ENSG00000021355	-0.0425354	7.82373	-0.322232	0.748753	0.866894	-6.54178	NOT	SERPINB1	serpin family B member 1 [Source:HGNC Symbol;Acc:HGNC:3311]
350	ENSG00000021461	-0.454161	-1.61786	-1.38216	0.173674	0.376096	-4.97763	NOT	CYP3A43	cytochrome P450 family 3 subfamily A member 43 [Source:HGNC Symbol;Acc:HGNC:17450]
351	ENSG00000021488	-0.573617	-1.19014	-1.90675	0.0628836	0.215562	-4.23715	NOT	SLC7A9	solute carrier family 7 member 9 [Source:HGNC Symbol;Acc:HGNC:11067]
352	ENSG00000021574	0.160247	4.90943	1.30833	0.197336	0.404496	-5.71352	NOT	SPAST	spastin [Source:HGNC Symbol;Acc:HGNC:11233]
353	ENSG00000021645	-0.0655896	-0.890582	-0.100131	0.920681	0.963656	-5.89424	NOT	NRXN3	neurexin 3 [Source:HGNC Symbol;Acc:HGNC:8010]
354	ENSG00000021762	-0.420813	6.71502	-2.50014	0.0160862	0.111896	-3.66452	NOT	OSBPL5	oxysterol binding protein like 5 [Source:HGNC Symbol;Acc:HGNC:16392]
355	ENSG00000021776	-0.0597483	5.71613	-0.482412	0.631828	0.791324	-6.47296	NOT	AQR	aquarius intron-binding spliceosomal factor [Source:HGNC Symbol;Acc:HGNC:29513]
356	ENSG00000021826	-0.155778	-1.65009	-0.446493	0.65736	0.807372	-5.75832	NOT	CPS1	carbamoyl-phosphate synthase 1 [Source:HGNC Symbol;Acc:HGNC:2323]
357	ENSG00000022267	-0.137161	3.70625	-0.714487	0.478578	0.674816	-6.19232	NOT	FHL1	four and a half LIM domains 1 [Source:HGNC Symbol;Acc:HGNC:3702]
358	ENSG00000022277	0.456271	5.17449	2.57423	0.0133715	0.103082	-3.47204	NOT	RTF2	replication termination factor 2 [Source:HGNC Symbol;Acc:HGNC:15890]
359	ENSG00000022556	-0.385459	3.16886	-1.70839	0.094382	0.268083	-4.97609	NOT	NLRP2	NLR family pyrin domain containing 2 [Source:HGNC Symbol;Acc:HGNC:22948]
16097	ENSG00000234261	4.74404	1.5211	6.70086	2.7e-08	6.22e-05	8.70556	UP	AL138720.1	novel transcript
361	ENSG00000022840	-0.0136097	8.05883	-0.0689831	0.945306	0.97451	-6.58903	NOT	RNF10	ring finger protein 10 [Source:HGNC Symbol;Acc:HGNC:10055]
362	ENSG00000022976	-0.0842925	4.80057	-0.804071	0.42554	0.630423	-6.22724	NOT	ZNF839	zinc finger protein 839 [Source:HGNC Symbol;Acc:HGNC:20345]
363	ENSG00000023041	-0.115312	5.6151	-1.44778	0.154537	0.352134	-5.55942	NOT	ZDHHC6	zinc finger DHHC-type palmitoyltransferase 6 [Source:HGNC Symbol;Acc:HGNC:19160]
364	ENSG00000023171	-0.276847	4.79632	-2.16307	0.0358294	0.162179	-4.32066	NOT	GRAMD1B	GRAM domain containing 1B [Source:HGNC Symbol;Acc:HGNC:29214]
365	ENSG00000023191	-0.535324	7.67942	-3.1927	0.00255841	0.0532313	-1.98994	NOT	RNH1	ribonuclease/angiogenin inhibitor 1 [Source:HGNC Symbol;Acc:HGNC:10074]
366	ENSG00000023228	-0.282415	5.18713	-2.6808	0.0101964	0.0913544	-3.2314	NOT	NDUFS1	NADH:ubiquinone oxidoreductase core subunit S1 [Source:HGNC Symbol;Acc:HGNC:7707]
367	ENSG00000023287	0.985976	6.76885	3.98371	0.000242704	0.020612	0.209909	NOT	RB1CC1	RB1 inducible coiled-coil 1 [Source:HGNC Symbol;Acc:HGNC:15574]
368	ENSG00000023318	0.17872	6.52896	1.69649	0.0966295	0.271357	-5.20062	NOT	ERP44	endoplasmic reticulum protein 44 [Source:HGNC Symbol;Acc:HGNC:18311]
369	ENSG00000023330	0.33277	5.51297	2.12436	0.0391095	0.169874	-4.4273	NOT	ALAS1	5'-aminolevulinate synthase 1 [Source:HGNC Symbol;Acc:HGNC:396]
370	ENSG00000023445	0.0164797	6.81853	0.0886392	0.929758	0.967239	-6.59615	NOT	BIRC3	baculoviral IAP repeat containing 3 [Source:HGNC Symbol;Acc:HGNC:591]
371	ENSG00000023516	-0.1733	5.18888	-0.789611	0.433853	0.638018	-6.26032	NOT	AKAP11	A-kinase anchoring protein 11 [Source:HGNC Symbol;Acc:HGNC:369]
372	ENSG00000023572	-0.0995099	2.96481	-0.582964	0.562797	0.73943	-6.18304	NOT	GLRX2	glutaredoxin 2 [Source:HGNC Symbol;Acc:HGNC:16065]
10567	ENSG00000170448	4.71082	1.31241	6.96076	1.11e-08	3.27e-05	9.48593	UP	NFXL1	nuclear transcription factor, X-box binding like 1 [Source:HGNC Symbol;Acc:HGNC:18726]
374	ENSG00000023697	-0.200109	4.66417	-1.43322	0.158635	0.357066	-5.53395	NOT	DERA	deoxyribose-phosphate aldolase [Source:HGNC Symbol;Acc:HGNC:24269]
375	ENSG00000023734	0.289479	6.54459	1.98755	0.0529035	0.196802	-4.70091	NOT	STRAP	serine/threonine kinase receptor associated protein [Source:HGNC Symbol;Acc:HGNC:30796]
376	ENSG00000023839	0.106958	2.282	0.679372	0.500346	0.692689	-6.03025	NOT	ABCC2	ATP binding cassette subfamily C member 2 [Source:HGNC Symbol;Acc:HGNC:53]
377	ENSG00000023892	-0.371886	8.21104	-2.62957	0.0116247	0.0973281	-3.36534	NOT	DEF6	DEF6 guanine nucleotide exchange factor [Source:HGNC Symbol;Acc:HGNC:2760]
378	ENSG00000023902	-0.468238	7.43052	-2.84361	0.00666098	0.0775498	-2.86875	NOT	PLEKHO1	pleckstrin homology domain containing O1 [Source:HGNC Symbol;Acc:HGNC:24310]
379	ENSG00000023909	0.0369636	3.50275	0.249197	0.80433	0.900408	-6.38801	NOT	GCLM	glutamate-cysteine ligase modifier subunit [Source:HGNC Symbol;Acc:HGNC:4312]
380	ENSG00000024048	-0.14623	7.41704	-1.02404	0.311235	0.524949	-6.07711	NOT	UBR2	ubiquitin protein ligase E3 component n-recognin 2 [Source:HGNC Symbol;Acc:HGNC:21289]
381	ENSG00000024422	0.518344	-1.69869	1.39814	0.168852	0.36979	-4.94914	NOT	EHD2	EH domain containing 2 [Source:HGNC Symbol;Acc:HGNC:3243]
382	ENSG00000024526	-0.614887	-2.73664	-1.641	0.107697	0.287182	-4.58333	NOT	DEPDC1	DEP domain containing 1 [Source:HGNC Symbol;Acc:HGNC:22949]
383	ENSG00000024862	0.37216	5.22749	2.11873	0.0396088	0.170864	-4.42746	NOT	CCDC28A	coiled-coil domain containing 28A [Source:HGNC Symbol;Acc:HGNC:21098]
384	ENSG00000025039	0.962889	4.17706	3.7818	0.000452337	0.0273275	-0.29436	NOT	RRAGD	Ras related GTP binding D [Source:HGNC Symbol;Acc:HGNC:19903]
385	ENSG00000025156	0.138117	4.80493	0.710952	0.480745	0.676858	-6.29651	NOT	HSF2	heat shock transcription factor 2 [Source:HGNC Symbol;Acc:HGNC:5225]
386	ENSG00000025293	0.618665	6.88527	3.87715	0.000337662	0.0236386	-0.10232	NOT	PHF20	PHD finger protein 20 [Source:HGNC Symbol;Acc:HGNC:16098]
387	ENSG00000025423	-0.8343	-1.82459	-2.34429	0.0234895	0.132729	-3.42371	NOT	HSD17B6	hydroxysteroid 17-beta dehydrogenase 6 [Source:HGNC Symbol;Acc:HGNC:23316]
388	ENSG00000025434	-0.569913	2.26843	-2.68268	0.0101472	0.0911446	-2.97805	NOT	NR1H3	nuclear receptor subfamily 1 group H member 3 [Source:HGNC Symbol;Acc:HGNC:7966]
389	ENSG00000025708	-0.797826	8.80639	-2.69547	0.00981829	0.0900013	-3.20582	NOT	TYMP	thymidine phosphorylase [Source:HGNC Symbol;Acc:HGNC:3148]
390	ENSG00000025770	0.209785	6.0948	1.10059	0.276866	0.491243	-5.99691	NOT	NCAPH2	non-SMC condensin II complex subunit H2 [Source:HGNC Symbol;Acc:HGNC:25071]
391	ENSG00000025772	0.480443	0.400327	2.05105	0.0460498	0.184066	-4.08599	NOT	TOMM34	translocase of outer mitochondrial membrane 34 [Source:HGNC Symbol;Acc:HGNC:15746]
392	ENSG00000025796	0.107706	6.35251	1.12254	0.267527	0.481935	-5.97565	NOT	SEC63	SEC63 homolog, protein translocation regulator [Source:HGNC Symbol;Acc:HGNC:21082]
393	ENSG00000025800	0.424774	4.4863	2.74005	0.00874678	0.0855764	-3.05129	NOT	KPNA6	karyopherin subunit alpha 6 [Source:HGNC Symbol;Acc:HGNC:6399]
394	ENSG00000026025	-0.352913	9.63326	-2.28132	0.0272621	0.142514	-4.10107	NOT	VIM	vimentin [Source:HGNC Symbol;Acc:HGNC:12692]
395	ENSG00000026036	-0.332685	0.0538553	-1.29222	0.202809	0.41068	-5.20356	NOT	RTEL1-TNFRSF6B	RTEL1-TNFRSF6B readthrough (NMD candidate) [Source:HGNC Symbol;Acc:HGNC:44095]
396	ENSG00000026103	0.494262	5.30242	2.47056	0.0173028	0.11503	-3.70645	NOT	FAS	Fas cell surface death receptor [Source:HGNC Symbol;Acc:HGNC:11920]
397	ENSG00000026297	-0.0214983	6.52394	-0.128074	0.898655	0.952614	-6.59161	NOT	RNASET2	ribonuclease T2 [Source:HGNC Symbol;Acc:HGNC:21686]
398	ENSG00000026508	-0.115973	9.21742	-0.703618	0.485258	0.680764	-6.32853	NOT	CD44	CD44 molecule (Indian blood group) [Source:HGNC Symbol;Acc:HGNC:1681]
399	ENSG00000026559	0.57376	-1.14119	1.29623	0.201437	0.408926	-5.10156	NOT	KCNG1	potassium voltage-gated channel modifier subfamily G member 1 [Source:HGNC Symbol;Acc:HGNC:6248]
400	ENSG00000026652	-0.339257	5.79418	-2.14211	0.0375745	0.166123	-4.40011	NOT	AGPAT4	1-acylglycerol-3-phosphate O-acyltransferase 4 [Source:HGNC Symbol;Acc:HGNC:20885]
401	ENSG00000026751	-0.0274464	5.82564	-0.122491	0.90305	0.954503	-6.58438	NOT	SLAMF7	SLAM family member 7 [Source:HGNC Symbol;Acc:HGNC:21394]
402	ENSG00000026950	-0.521466	7.83043	-2.32809	0.0244122	0.134755	-4.02723	NOT	BTN3A1	butyrophilin subfamily 3 member A1 [Source:HGNC Symbol;Acc:HGNC:1138]
403	ENSG00000027001	-0.0551869	3.13205	-0.348175	0.729315	0.854592	-6.31233	NOT	MIPEP	mitochondrial intermediate peptidase [Source:HGNC Symbol;Acc:HGNC:7104]
404	ENSG00000027075	0.75499	6.33693	2.56336	0.0137419	0.104546	-3.52279	NOT	PRKCH	protein kinase C eta [Source:HGNC Symbol;Acc:HGNC:9403]
405	ENSG00000027697	0.595644	8.1328	3.50134	0.00104955	0.0390724	-1.16002	NOT	IFNGR1	interferon gamma receptor 1 [Source:HGNC Symbol;Acc:HGNC:5439]
406	ENSG00000027847	-0.318543	4.66081	-2.6787	0.0102516	0.0916455	-3.20919	NOT	B4GALT7	beta-1,4-galactosyltransferase 7 [Source:HGNC Symbol;Acc:HGNC:930]
407	ENSG00000027869	-0.291909	5.83775	-0.650295	0.518774	0.706588	-6.38049	NOT	SH2D2A	SH2 domain containing 2A [Source:HGNC Symbol;Acc:HGNC:10821]
408	ENSG00000028116	-0.00490329	5.10861	-0.0276812	0.978038	0.989721	-6.5663	NOT	VRK2	VRK serine/threonine kinase 2 [Source:HGNC Symbol;Acc:HGNC:12719]
409	ENSG00000028137	-0.0618121	10.0261	-0.382126	0.704148	0.838969	-6.48782	NOT	TNFRSF1B	TNF receptor superfamily member 1B [Source:HGNC Symbol;Acc:HGNC:11917]
410	ENSG00000028203	0.269869	4.68762	1.75549	0.0859098	0.254463	-5.04744	NOT	VEZT	vezatin, adherens junctions transmembrane protein [Source:HGNC Symbol;Acc:HGNC:18258]
411	ENSG00000028277	-0.377166	7.30474	-1.86687	0.0683747	0.225149	-4.91395	NOT	POU2F2	POU class 2 homeobox 2 [Source:HGNC Symbol;Acc:HGNC:9213]
412	ENSG00000028310	-0.250452	6.43711	-1.8787	0.0667044	0.222226	-4.89485	NOT	BRD9	bromodomain containing 9 [Source:HGNC Symbol;Acc:HGNC:25818]
413	ENSG00000028528	-0.222201	7.18995	-1.67066	0.101658	0.278572	-5.24018	NOT	SNX1	sorting nexin 1 [Source:HGNC Symbol;Acc:HGNC:11172]
414	ENSG00000028839	0.157677	4.16068	1.39422	0.170025	0.371209	-5.54251	NOT	TBPL1	TATA-box binding protein like 1 [Source:HGNC Symbol;Acc:HGNC:11589]
415	ENSG00000029153	0.349085	-0.433143	1.02103	0.312644	0.526531	-5.44389	NOT	ARNTL2	aryl hydrocarbon receptor nuclear translocator like 2 [Source:HGNC Symbol;Acc:HGNC:18984]
416	ENSG00000029363	0.248983	7.76789	1.68752	0.098353	0.274194	-5.2099	NOT	BCLAF1	BCL2 associated transcription factor 1 [Source:HGNC Symbol;Acc:HGNC:16863]
417	ENSG00000029364	-0.137821	5.01967	-1.71253	0.0936122	0.267268	-5.13909	NOT	SLC39A9	solute carrier family 39 member 9 [Source:HGNC Symbol;Acc:HGNC:20182]
418	ENSG00000029534	0.181222	3.80753	0.520654	0.605134	0.771477	-6.32015	NOT	ANK1	ankyrin 1 [Source:HGNC Symbol;Acc:HGNC:492]
419	ENSG00000029639	-0.383586	3.21333	-2.45666	0.017903	0.116609	-3.57523	NOT	TFB1M	transcription factor B1, mitochondrial [Source:HGNC Symbol;Acc:HGNC:17037]
420	ENSG00000029725	0.223462	4.82281	1.69939	0.096077	0.270761	-5.14767	NOT	RABEP1	rabaptin, RAB GTPase binding effector protein 1 [Source:HGNC Symbol;Acc:HGNC:17677]
421	ENSG00000029993	-0.0677727	2.20563	-0.301005	0.764783	0.877073	-6.20408	NOT	HMGB3	high mobility group box 3 [Source:HGNC Symbol;Acc:HGNC:5004]
422	ENSG00000030066	-0.146437	5.54567	-1.1098	0.272921	0.487205	-5.97526	NOT	NUP160	nucleoporin 160 [Source:HGNC Symbol;Acc:HGNC:18017]
423	ENSG00000030304	-0.113211	-0.849684	-0.297759	0.767243	0.878145	-5.8614	NOT	MUSK	muscle associated receptor tyrosine kinase [Source:HGNC Symbol;Acc:HGNC:7525]
17007	ENSG00000247095	4.70442	0.241145	5.37476	2.55e-06	0.00164152	4.5289	UP	MIR210HG	MIR210 host gene [Source:HGNC Symbol;Acc:HGNC:39524]
425	ENSG00000030582	-0.900026	9.1338	-3.09642	0.00335012	0.0589313	-2.22246	NOT	GRN	granulin precursor [Source:HGNC Symbol;Acc:HGNC:4601]
426	ENSG00000031003	0.569886	5.05589	2.70052	0.00969105	0.0895705	-3.17707	NOT	FAM13B	family with sequence similarity 13 member B [Source:HGNC Symbol;Acc:HGNC:1335]
427	ENSG00000031081	-0.289249	5.30847	-1.8694	0.0680148	0.224499	-4.8892	NOT	ARHGAP31	Rho GTPase activating protein 31 [Source:HGNC Symbol;Acc:HGNC:29216]
428	ENSG00000031691	-0.270022	0.670527	-0.969581	0.337384	0.550581	-5.60659	NOT	CENPQ	centromere protein Q [Source:HGNC Symbol;Acc:HGNC:21347]
429	ENSG00000031698	-0.14468	6.51676	-1.25359	0.216398	0.426147	-5.82475	NOT	SARS1	seryl-tRNA synthetase 1 [Source:HGNC Symbol;Acc:HGNC:10537]
430	ENSG00000031823	-0.162161	6.76481	-1.83856	0.0725165	0.232867	-4.9651	NOT	RANBP3	RAN binding protein 3 [Source:HGNC Symbol;Acc:HGNC:9850]
431	ENSG00000032219	0.737093	5.62224	2.90108	0.00571311	0.0722313	-2.71847	NOT	ARID4A	AT-rich interaction domain 4A [Source:HGNC Symbol;Acc:HGNC:9885]
432	ENSG00000032389	-0.282374	5.06485	-2.4384	0.0187199	0.119358	-3.76799	NOT	EIPR1	EARP complex and GARP complex interacting protein 1 [Source:HGNC Symbol;Acc:HGNC:12383]
433	ENSG00000032444	-0.174413	7.72903	-1.27601	0.208432	0.417244	-5.79231	NOT	PNPLA6	patatin like phospholipase domain containing 6 [Source:HGNC Symbol;Acc:HGNC:16268]
434	ENSG00000032742	0.117761	4.01884	0.941891	0.351225	0.564106	-6.0398	NOT	IFT88	intraflagellar transport 88 [Source:HGNC Symbol;Acc:HGNC:20606]
435	ENSG00000033011	-0.805414	2.48784	-3.56849	0.000860238	0.0361687	-0.772286	NOT	ALG1	ALG1 chitobiosyldiphosphodolichol beta-mannosyltransferase [Source:HGNC Symbol;Acc:HGNC:18294]
436	ENSG00000033030	0.115699	5.49127	0.96617	0.339069	0.55207	-6.11942	NOT	ZCCHC8	zinc finger CCHC-type containing 8 [Source:HGNC Symbol;Acc:HGNC:25265]
437	ENSG00000033100	-0.270329	6.42048	-2.47062	0.0173002	0.11503	-3.72881	NOT	CHPF2	chondroitin polymerizing factor 2 [Source:HGNC Symbol;Acc:HGNC:29270]
438	ENSG00000033122	0.336584	0.17701	1.05229	0.298225	0.513188	-5.46983	NOT	LRRC7	leucine rich repeat containing 7 [Source:HGNC Symbol;Acc:HGNC:18531]
439	ENSG00000033170	0.0271859	4.40721	0.147972	0.883019	0.943581	-6.50642	NOT	FUT8	fucosyltransferase 8 [Source:HGNC Symbol;Acc:HGNC:4019]
440	ENSG00000033178	0.423321	5.80765	2.23482	0.0303856	0.150275	-4.21641	NOT	UBA6	ubiquitin like modifier activating enzyme 6 [Source:HGNC Symbol;Acc:HGNC:25581]
441	ENSG00000033327	0.882267	7.11971	4.08618	0.000176103	0.0165873	0.513592	NOT	GAB2	GRB2 associated binding protein 2 [Source:HGNC Symbol;Acc:HGNC:14458]
442	ENSG00000033627	0.437627	6.42759	3.2522	0.0021613	0.0499812	-1.83804	NOT	ATP6V0A1	ATPase H+ transporting V0 subunit a1 [Source:HGNC Symbol;Acc:HGNC:865]
443	ENSG00000033800	0.784188	6.34314	3.14073	0.00296067	0.0567014	-2.12752	NOT	PIAS1	protein inhibitor of activated STAT 1 [Source:HGNC Symbol;Acc:HGNC:2752]
444	ENSG00000033867	-0.204869	5.95589	-1.11253	0.271756	0.486125	-5.98177	NOT	SLC4A7	solute carrier family 4 member 7 [Source:HGNC Symbol;Acc:HGNC:11033]
445	ENSG00000034053	-0.535236	6.85905	-2.45756	0.0178636	0.116552	-3.75721	NOT	APBA2	amyloid beta precursor protein binding family A member 2 [Source:HGNC Symbol;Acc:HGNC:579]
446	ENSG00000034152	0.303237	7.86732	1.52142	0.135079	0.326463	-5.46178	NOT	MAP2K3	mitogen-activated protein kinase kinase 3 [Source:HGNC Symbol;Acc:HGNC:6843]
447	ENSG00000034239	0.177258	-2.72023	0.423771	0.67373	0.81931	-5.70918	NOT	EFCAB1	EF-hand calcium binding domain 1 [Source:HGNC Symbol;Acc:HGNC:25678]
448	ENSG00000034533	0.0565514	2.15136	0.311978	0.756484	0.872043	-6.1922	NOT	ASTE1	asteroid homolog 1 [Source:HGNC Symbol;Acc:HGNC:25021]
449	ENSG00000034677	0.705277	5.82651	2.14383	0.0374283	0.165866	-4.39594	NOT	RNF19A	ring finger protein 19A, RBR E3 ubiquitin protein ligase [Source:HGNC Symbol;Acc:HGNC:13432]
450	ENSG00000034693	0.0428867	2.1041	0.138911	0.890134	0.948364	-6.22449	NOT	PEX3	peroxisomal biogenesis factor 3 [Source:HGNC Symbol;Acc:HGNC:8858]
451	ENSG00000035115	-0.190066	4.91299	-1.17985	0.244196	0.456709	-5.8693	NOT	SH3YL1	SH3 and SYLF domain containing 1 [Source:HGNC Symbol;Acc:HGNC:29546]
452	ENSG00000035141	-0.273296	4.76974	-2.24341	0.0297859	0.148855	-4.15923	NOT	FAM136A	family with sequence similarity 136 member A [Source:HGNC Symbol;Acc:HGNC:25911]
453	ENSG00000035403	-0.151983	7.04682	-0.845231	0.402407	0.611475	-6.24363	NOT	VCL	vinculin [Source:HGNC Symbol;Acc:HGNC:12665]
454	ENSG00000035499	-0.445978	-0.234834	-1.60599	0.115199	0.298595	-4.76438	NOT	DEPDC1B	DEP domain containing 1B [Source:HGNC Symbol;Acc:HGNC:24902]
455	ENSG00000035664	0.711772	4.53297	2.07894	0.0432919	0.177937	-4.45801	NOT	DAPK2	death associated protein kinase 2 [Source:HGNC Symbol;Acc:HGNC:2675]
456	ENSG00000035681	0.161139	5.67979	1.27506	0.208764	0.417568	-5.78742	NOT	NSMAF	neutral sphingomyelinase activation associated factor [Source:HGNC Symbol;Acc:HGNC:8017]
457	ENSG00000035687	-0.0110859	5.77245	-0.0554367	0.956033	0.979657	-6.58918	NOT	ADSS2	adenylosuccinate synthase 2 [Source:HGNC Symbol;Acc:HGNC:292]
458	ENSG00000035720	0.253534	3.63473	1.01353	0.316171	0.530158	-5.92743	NOT	STAP1	signal transducing adaptor family member 1 [Source:HGNC Symbol;Acc:HGNC:24133]
459	ENSG00000035862	0.0535414	6.77471	0.410887	0.683085	0.825358	-6.51564	NOT	TIMP2	TIMP metallopeptidase inhibitor 2 [Source:HGNC Symbol;Acc:HGNC:11821]
460	ENSG00000035928	0.212321	5.40069	1.36933	0.177621	0.380359	-5.65832	NOT	RFC1	replication factor C subunit 1 [Source:HGNC Symbol;Acc:HGNC:9969]
461	ENSG00000036054	0.821385	5.7271	3.8844	0.000330195	0.0233792	-0.0714256	NOT	TBC1D23	TBC1 domain family member 23 [Source:HGNC Symbol;Acc:HGNC:25622]
462	ENSG00000036257	0.395522	6.82359	1.94521	0.0579477	0.206499	-4.77798	NOT	CUL3	cullin 3 [Source:HGNC Symbol;Acc:HGNC:2553]
463	ENSG00000036448	-0.709492	4.41294	-0.880705	0.383109	0.595025	-6.13275	NOT	MYOM2	myomesin 2 [Source:HGNC Symbol;Acc:HGNC:7614]
464	ENSG00000036530	-0.480599	-0.206649	-1.91227	0.0621537	0.214123	-4.28706	NOT	CYP46A1	cytochrome P450 family 46 subfamily A member 1 [Source:HGNC Symbol;Acc:HGNC:2641]
465	ENSG00000036549	-0.0858011	4.87341	-0.612121	0.543507	0.725212	-6.36649	NOT	AC118549.1	zinc finger ZZ-type containing 3 [Source:NCBI gene;Acc:26009]
466	ENSG00000036565	-0.868928	-1.41202	-2.35463	0.0229165	0.131405	-3.41778	NOT	SLC18A1	solute carrier family 18 member A1 [Source:HGNC Symbol;Acc:HGNC:10934]
467	ENSG00000036672	0.125614	-1.98404	0.272887	0.786176	0.889219	-5.79665	NOT	USP2	ubiquitin specific peptidase 2 [Source:HGNC Symbol;Acc:HGNC:12618]
468	ENSG00000036828	0.724952	-2.42872	1.81754	0.0757271	0.23841	-4.32474	NOT	CASR	calcium sensing receptor [Source:HGNC Symbol;Acc:HGNC:1514]
469	ENSG00000037042	-0.360134	3.3007	-2.38518	0.0212969	0.1274	-3.73636	NOT	TUBG2	tubulin gamma 2 [Source:HGNC Symbol;Acc:HGNC:12419]
470	ENSG00000037241	-0.0439632	2.74056	-0.296586	0.768133	0.878678	-6.27622	NOT	RPL26L1	ribosomal protein L26 like 1 [Source:HGNC Symbol;Acc:HGNC:17050]
471	ENSG00000037280	-0.633868	2.20345	-1.3361	0.188165	0.393257	-5.3916	NOT	FLT4	fms related receptor tyrosine kinase 4 [Source:HGNC Symbol;Acc:HGNC:3767]
472	ENSG00000037474	-0.29194	6.32803	-2.28172	0.0272365	0.142452	-4.12794	NOT	NSUN2	NOP2/Sun RNA methyltransferase 2 [Source:HGNC Symbol;Acc:HGNC:25994]
473	ENSG00000037637	0.227013	5.39113	2.2983	0.026195	0.139593	-4.07614	NOT	FBXO42	F-box protein 42 [Source:HGNC Symbol;Acc:HGNC:29249]
474	ENSG00000037749	0.165694	3.69055	1.31598	0.194776	0.401447	-5.59406	NOT	MFAP3	microfibril associated protein 3 [Source:HGNC Symbol;Acc:HGNC:7034]
475	ENSG00000037757	-0.606283	4.20471	-3.26873	0.0020618	0.0491087	-1.7158	NOT	MRI1	methylthioribose-1-phosphate isomerase 1 [Source:HGNC Symbol;Acc:HGNC:28469]
476	ENSG00000037897	-0.489694	0.636588	-1.91576	0.0616954	0.213544	-4.35197	NOT	METTL1	methyltransferase like 1 [Source:HGNC Symbol;Acc:HGNC:7030]
477	ENSG00000038002	-0.271674	3.99774	-2.15944	0.0361265	0.162671	-4.26508	NOT	AGA	aspartylglucosaminidase [Source:HGNC Symbol;Acc:HGNC:318]
478	ENSG00000038210	-0.287296	2.75064	-1.10574	0.274653	0.488738	-5.72731	NOT	PI4K2B	phosphatidylinositol 4-kinase type 2 beta [Source:HGNC Symbol;Acc:HGNC:18215]
479	ENSG00000038219	0.250255	6.55507	1.30486	0.198506	0.405786	-5.76168	NOT	BOD1L1	biorientation of chromosomes in cell division 1 like 1 [Source:HGNC Symbol;Acc:HGNC:31792]
480	ENSG00000038274	-0.344604	5.8362	-1.90835	0.0626703	0.215187	-4.83568	NOT	MAT2B	methionine adenosyltransferase 2B [Source:HGNC Symbol;Acc:HGNC:6905]
481	ENSG00000038295	0.538438	-2.40548	1.25245	0.216808	0.426576	-5.08941	NOT	TLL1	tolloid like 1 [Source:HGNC Symbol;Acc:HGNC:11843]
482	ENSG00000038358	-0.160311	6.14867	-1.12504	0.266477	0.48073	-5.97084	NOT	EDC4	enhancer of mRNA decapping 4 [Source:HGNC Symbol;Acc:HGNC:17157]
483	ENSG00000038382	-0.0553225	6.2328	-0.282755	0.778648	0.884457	-6.55795	NOT	TRIO	trio Rho guanine nucleotide exchange factor [Source:HGNC Symbol;Acc:HGNC:12303]
484	ENSG00000038427	-0.265634	7.64641	-1.16625	0.249594	0.46229	-5.92299	NOT	VCAN	versican [Source:HGNC Symbol;Acc:HGNC:2464]
485	ENSG00000038532	-0.0924029	5.91868	-1.14109	0.259806	0.473272	-5.94991	NOT	CLEC16A	C-type lectin domain containing 16A [Source:HGNC Symbol;Acc:HGNC:29013]
486	ENSG00000038945	-0.464305	2.99781	-1.28151	0.206512	0.415127	-5.55799	NOT	MSR1	macrophage scavenger receptor 1 [Source:HGNC Symbol;Acc:HGNC:7376]
487	ENSG00000039068	0.0632661	-0.28532	0.165827	0.869028	0.936175	-5.93705	NOT	CDH1	cadherin 1 [Source:HGNC Symbol;Acc:HGNC:1748]
488	ENSG00000039123	0.239071	4.87888	1.39736	0.169086	0.369794	-5.59542	NOT	MTREX	Mtr4 exosome RNA helicase [Source:HGNC Symbol;Acc:HGNC:18734]
489	ENSG00000039139	0.314406	-3.00674	0.68292	0.498122	0.690718	-5.56301	NOT	DNAH5	dynein axonemal heavy chain 5 [Source:HGNC Symbol;Acc:HGNC:2950]
490	ENSG00000039319	0.587658	5.51698	2.79559	0.007563	0.0814581	-2.97118	NOT	ZFYVE16	zinc finger FYVE-type containing 16 [Source:HGNC Symbol;Acc:HGNC:20756]
491	ENSG00000039523	0.126166	6.89801	0.908604	0.36835	0.580584	-6.18961	NOT	RIPOR1	RHO family interacting cell polarization regulator 1 [Source:HGNC Symbol;Acc:HGNC:25836]
492	ENSG00000039537	-0.146537	-3.36847	-0.41759	0.678212	0.822155	-5.6833	NOT	C6	complement C6 [Source:HGNC Symbol;Acc:HGNC:1339]
493	ENSG00000039560	0.167394	-1.09844	0.440203	0.661875	0.810697	-5.79206	NOT	RAI14	retinoic acid induced 14 [Source:HGNC Symbol;Acc:HGNC:14873]
494	ENSG00000039600	-0.584125	1.12316	-1.89889	0.063934	0.217622	-4.4285	NOT	SOX30	SRY-box transcription factor 30 [Source:HGNC Symbol;Acc:HGNC:30635]
495	ENSG00000039650	-0.214511	6.11168	-1.68017	0.0997825	0.276503	-5.22325	NOT	PNKP	polynucleotide kinase 3'-phosphatase [Source:HGNC Symbol;Acc:HGNC:9154]
496	ENSG00000039987	0.179928	-2.84788	0.517432	0.607363	0.773307	-5.66261	NOT	BEST2	bestrophin 2 [Source:HGNC Symbol;Acc:HGNC:17107]
497	ENSG00000040199	-0.018714	3.5964	-0.129652	0.897414	0.952041	-6.42285	NOT	PHLPP2	PH domain and leucine rich repeat protein phosphatase 2 [Source:HGNC Symbol;Acc:HGNC:29149]
498	ENSG00000040275	-0.28379	2.12675	-1.65877	0.104045	0.282256	-4.92744	NOT	SPDL1	spindle apparatus coiled-coil protein 1 [Source:HGNC Symbol;Acc:HGNC:26010]
499	ENSG00000040341	-0.117714	4.75708	-0.882371	0.382217	0.594037	-6.15926	NOT	STAU2	staufen double-stranded RNA binding protein 2 [Source:HGNC Symbol;Acc:HGNC:11371]
500	ENSG00000040487	0.169063	4.56576	1.01519	0.315387	0.529415	-6.02017	NOT	SLC66A1	solute carrier family 66 member 1 [Source:HGNC Symbol;Acc:HGNC:26001]
501	ENSG00000040531	-0.276371	4.14236	-2.0938	0.0418825	0.175048	-4.40495	NOT	CTNS	cystinosin, lysosomal cystine transporter [Source:HGNC Symbol;Acc:HGNC:2518]
502	ENSG00000040608	-0.748961	0.680741	-2.77451	0.00799364	0.0831131	-2.63618	NOT	RTN4R	reticulon 4 receptor [Source:HGNC Symbol;Acc:HGNC:18601]
503	ENSG00000040633	-0.00800968	3.87097	-0.0448899	0.964392	0.983231	-6.46191	NOT	PHF23	PHD finger protein 23 [Source:HGNC Symbol;Acc:HGNC:28428]
504	ENSG00000040933	-0.332381	7.67535	-1.62256	0.111597	0.293019	-5.31158	NOT	INPP4A	inositol polyphosphate-4-phosphatase type I A [Source:HGNC Symbol;Acc:HGNC:6074]
505	ENSG00000041353	0.160907	1.02969	0.442595	0.660157	0.80931	-5.99944	NOT	RAB27B	RAB27B, member RAS oncogene family [Source:HGNC Symbol;Acc:HGNC:9767]
506	ENSG00000041357	-0.235356	6.34864	-1.7769	0.0822749	0.248709	-5.06811	NOT	PSMA4	proteasome 20S subunit alpha 4 [Source:HGNC Symbol;Acc:HGNC:9533]
507	ENSG00000041515	0.583633	0.516741	1.4353	0.158045	0.356326	-5.05881	NOT	MYO16	myosin XVI [Source:HGNC Symbol;Acc:HGNC:29822]
508	ENSG00000041802	-0.159923	4.58018	-0.582296	0.563243	0.739723	-6.36363	NOT	LSG1	large 60S subunit nuclear export GTPase 1 [Source:HGNC Symbol;Acc:HGNC:25652]
509	ENSG00000041880	-0.51994	3.15345	-3.00711	0.00428565	0.0646521	-2.29401	NOT	PARP3	poly(ADP-ribose) polymerase family member 3 [Source:HGNC Symbol;Acc:HGNC:273]
510	ENSG00000041988	0.0188624	3.7181	0.110503	0.912497	0.959541	-6.43905	NOT	THAP3	THAP domain containing 3 [Source:HGNC Symbol;Acc:HGNC:20855]
511	ENSG00000042062	0.189255	3.12853	1.0099	0.317889	0.531609	-5.86857	NOT	RIPOR3	RIPOR family member 3 [Source:HGNC Symbol;Acc:HGNC:16168]
512	ENSG00000042088	0.471821	4.67807	3.01627	0.0041795	0.0639029	-2.39358	NOT	TDP1	tyrosyl-DNA phosphodiesterase 1 [Source:HGNC Symbol;Acc:HGNC:18884]
513	ENSG00000042286	-0.483517	2.7381	-2.24501	0.0296749	0.148648	-3.96218	NOT	AIFM2	apoptosis inducing factor mitochondria associated 2 [Source:HGNC Symbol;Acc:HGNC:21411]
514	ENSG00000042317	-0.166063	1.68602	-0.971757	0.336313	0.549351	-5.7232	NOT	SPATA7	spermatogenesis associated 7 [Source:HGNC Symbol;Acc:HGNC:20423]
515	ENSG00000042429	-0.57119	-0.0257363	-2.61264	0.0121355	0.0993178	-2.9495	NOT	MED17	mediator complex subunit 17 [Source:HGNC Symbol;Acc:HGNC:2375]
516	ENSG00000042445	-0.391901	4.51015	-2.50168	0.0160247	0.111844	-3.59756	NOT	RETSAT	retinol saturase [Source:HGNC Symbol;Acc:HGNC:25991]
517	ENSG00000042493	-0.394992	6.81106	-1.75606	0.0858118	0.254458	-5.10333	NOT	CAPG	capping actin protein, gelsolin like [Source:HGNC Symbol;Acc:HGNC:1474]
518	ENSG00000042753	-0.401693	5.73253	-1.91404	0.0619216	0.213894	-4.82324	NOT	AP2S1	adaptor related protein complex 2 subunit sigma 1 [Source:HGNC Symbol;Acc:HGNC:565]
519	ENSG00000042781	-0.113945	-1.90381	-0.197755	0.844118	0.922175	-5.8185	NOT	USH2A	usherin [Source:HGNC Symbol;Acc:HGNC:12601]
520	ENSG00000042813	0.420869	-3.18418	0.991942	0.326475	0.539577	-5.31985	NOT	ZPBP	zona pellucida binding protein [Source:HGNC Symbol;Acc:HGNC:15662]
521	ENSG00000042832	0.495698	5.64134	2.22279	0.031244	0.152378	-4.23634	NOT	TG	thyroglobulin [Source:HGNC Symbol;Acc:HGNC:11764]
2799	ENSG00000105835	4.64187	8.84616	3.96013	0.000261175	0.021562	0.158219	UP	NAMPT	nicotinamide phosphoribosyltransferase [Source:HGNC Symbol;Acc:HGNC:30092]
523	ENSG00000043039	0.599112	-3.30357	1.3799	0.174365	0.376766	-4.90418	NOT	BARX2	BARX homeobox 2 [Source:HGNC Symbol;Acc:HGNC:956]
524	ENSG00000043093	0.248198	5.14666	1.90522	0.063087	0.215891	-4.81913	NOT	DCUN1D1	defective in cullin neddylation 1 domain containing 1 [Source:HGNC Symbol;Acc:HGNC:18184]
525	ENSG00000043143	-0.250818	6.5787	-1.5174	0.136089	0.327781	-5.4732	NOT	JADE2	jade family PHD finger 2 [Source:HGNC Symbol;Acc:HGNC:22984]
1353	ENSG00000081041	4.53206	0.690356	4.49941	4.69e-05	0.0085735	1.94194	UP	CXCL2	C-X-C motif chemokine ligand 2 [Source:HGNC Symbol;Acc:HGNC:4603]
527	ENSG00000043514	-0.452774	4.50557	-2.70094	0.00968044	0.0895705	-3.14714	NOT	TRIT1	tRNA isopentenyltransferase 1 [Source:HGNC Symbol;Acc:HGNC:20286]
10094	ENSG00000167680	4.45121	2.88442	4.22466	0.000113616	0.0142688	1.12579	UP	SEMA6B	semaphorin 6B [Source:HGNC Symbol;Acc:HGNC:10739]
529	ENSG00000044090	-0.535327	2.66514	-2.3758	0.0217828	0.128672	-3.68767	NOT	CUL7	cullin 7 [Source:HGNC Symbol;Acc:HGNC:21024]
530	ENSG00000044115	-0.367328	6.64154	-2.34317	0.0235522	0.132838	-4.00162	NOT	CTNNA1	catenin alpha 1 [Source:HGNC Symbol;Acc:HGNC:2509]
531	ENSG00000044446	0.00439431	5.57695	0.0424434	0.966331	0.984431	-6.58461	NOT	PHKA2	phosphorylase kinase regulatory subunit alpha 2 [Source:HGNC Symbol;Acc:HGNC:8926]
532	ENSG00000044459	-0.215237	3.28801	-0.966062	0.339123	0.552114	-5.93467	NOT	CNTLN	centlein [Source:HGNC Symbol;Acc:HGNC:23432]
533	ENSG00000044524	0.603897	-3.13749	1.16795	0.248916	0.461817	-5.1501	NOT	EPHA3	EPH receptor A3 [Source:HGNC Symbol;Acc:HGNC:3387]
534	ENSG00000044574	0.740769	8.90297	3.18727	0.00259785	0.0537752	-1.99363	NOT	HSPA5	heat shock protein family A (Hsp70) member 5 [Source:HGNC Symbol;Acc:HGNC:5238]
535	ENSG00000046604	-0.0974042	-2.79487	-0.276082	0.783736	0.887812	-5.75488	NOT	DSG2	desmoglein 2 [Source:HGNC Symbol;Acc:HGNC:3049]
536	ENSG00000046647	-0.129116	3.84953	-1.28622	0.204875	0.41322	-5.65153	NOT	GEMIN8	gem nuclear organelle associated protein 8 [Source:HGNC Symbol;Acc:HGNC:26044]
537	ENSG00000046651	0.0252662	6.23697	0.205907	0.837783	0.918482	-6.57686	NOT	OFD1	OFD1 centriole and centriolar satellite protein [Source:HGNC Symbol;Acc:HGNC:2567]
538	ENSG00000046653	-0.0637093	2.50921	-0.311214	0.75706	0.872468	-6.24158	NOT	GPM6B	glycoprotein M6B [Source:HGNC Symbol;Acc:HGNC:4461]
539	ENSG00000046889	0.509904	-2.57215	0.939883	0.352244	0.565292	-5.39163	NOT	PREX2	phosphatidylinositol-3,4,5-trisphosphate dependent Rac exchange factor 2 [Source:HGNC Symbol;Acc:HGNC:22950]
540	ENSG00000047056	-0.0392748	6.61948	-0.405815	0.686782	0.827824	-6.51756	NOT	WDR37	WD repeat domain 37 [Source:HGNC Symbol;Acc:HGNC:31406]
541	ENSG00000047188	-0.0145162	6.00101	-0.0893189	0.929221	0.966972	-6.59114	NOT	YTHDC2	YTH domain containing 2 [Source:HGNC Symbol;Acc:HGNC:24721]
542	ENSG00000047230	-0.158782	3.40848	-1.12538	0.266334	0.480705	-5.78778	NOT	CTPS2	CTP synthase 2 [Source:HGNC Symbol;Acc:HGNC:2520]
543	ENSG00000047249	0.378719	5.17426	2.64804	0.0110899	0.0949519	-3.30511	NOT	ATP6V1H	ATPase H+ transporting V1 subunit H [Source:HGNC Symbol;Acc:HGNC:18303]
544	ENSG00000047315	-0.0507838	6.44142	-0.329852	0.743027	0.863619	-6.54495	NOT	POLR2B	RNA polymerase II subunit B [Source:HGNC Symbol;Acc:HGNC:9188]
545	ENSG00000047346	0.862813	4.75294	2.98506	0.00455178	0.0660518	-2.47167	NOT	FAM214A	family with sequence similarity 214 member A [Source:HGNC Symbol;Acc:HGNC:25609]
546	ENSG00000047365	-0.00892627	6.68027	-0.0478224	0.962067	0.982347	-6.59899	NOT	ARAP2	ArfGAP with RhoGAP domain, ankyrin repeat and PH domain 2 [Source:HGNC Symbol;Acc:HGNC:16924]
547	ENSG00000047410	-0.166078	6.86533	-1.2161	0.230223	0.441445	-5.8698	NOT	TPR	translocated promoter region, nuclear basket protein [Source:HGNC Symbol;Acc:HGNC:12017]
548	ENSG00000047457	-0.044476	-0.390461	-0.152308	0.879618	0.941548	-5.93069	NOT	CP	ceruloplasmin [Source:HGNC Symbol;Acc:HGNC:2295]
549	ENSG00000047578	0.153786	5.37163	1.19044	0.240052	0.45242	-5.87876	NOT	KIAA0556	KIAA0556 [Source:HGNC Symbol;Acc:HGNC:29068]
550	ENSG00000047579	0.28495	5.02626	2.15098	0.036827	0.164672	-4.35571	NOT	DTNBP1	dystrobrevin binding protein 1 [Source:HGNC Symbol;Acc:HGNC:17328]
551	ENSG00000047617	-0.123151	-0.9503	-0.305515	0.761368	0.875094	-5.85154	NOT	ANO2	anoctamin 2 [Source:HGNC Symbol;Acc:HGNC:1183]
552	ENSG00000047621	0.0414927	3.59024	0.293116	0.770767	0.880428	-6.38703	NOT	C12orf4	chromosome 12 open reading frame 4 [Source:HGNC Symbol;Acc:HGNC:1184]
553	ENSG00000047634	0.337014	4.4584	1.3753	0.175776	0.378357	-5.59324	NOT	SCML1	Scm polycomb group protein like 1 [Source:HGNC Symbol;Acc:HGNC:10580]
554	ENSG00000047644	-0.261667	6.04386	-1.64034	0.107834	0.2874	-5.28476	NOT	WWC3	WWC family member 3 [Source:HGNC Symbol;Acc:HGNC:29237]
555	ENSG00000047648	0.270716	2.18493	1.14478	0.258292	0.471988	-5.6059	NOT	ARHGAP6	Rho GTPase activating protein 6 [Source:HGNC Symbol;Acc:HGNC:676]
556	ENSG00000047662	0.263816	3.63072	1.67279	0.101237	0.277968	-5.08058	NOT	FAM184B	family with sequence similarity 184 member B [Source:HGNC Symbol;Acc:HGNC:29235]
557	ENSG00000047849	-0.405183	6.69706	-2.75812	0.0083441	0.084414	-3.07554	NOT	MAP4	microtubule associated protein 4 [Source:HGNC Symbol;Acc:HGNC:6862]
558	ENSG00000047932	0.176191	2.79305	0.501079	0.618733	0.781045	-6.20123	NOT	GOPC	golgi associated PDZ and coiled-coil motif containing [Source:HGNC Symbol;Acc:HGNC:17643]
559	ENSG00000048028	-0.22883	5.00354	-1.45824	0.151647	0.348931	-5.52041	NOT	USP28	ubiquitin specific peptidase 28 [Source:HGNC Symbol;Acc:HGNC:12625]
560	ENSG00000048052	-0.157481	5.28266	-0.767076	0.447001	0.649513	-6.28186	NOT	HDAC9	histone deacetylase 9 [Source:HGNC Symbol;Acc:HGNC:14065]
561	ENSG00000048140	-0.543281	5.10116	-2.98592	0.00454113	0.0660518	-2.49323	NOT	TSPAN17	tetraspanin 17 [Source:HGNC Symbol;Acc:HGNC:13594]
562	ENSG00000048342	0.218891	3.64921	0.531599	0.597591	0.765535	-6.29466	NOT	CC2D2A	coiled-coil and C2 domain containing 2A [Source:HGNC Symbol;Acc:HGNC:29253]
563	ENSG00000048392	0.214501	4.67395	1.51664	0.136279	0.328178	-5.41566	NOT	RRM2B	ribonucleotide reductase regulatory TP53 inducible subunit M2B [Source:HGNC Symbol;Acc:HGNC:17296]
564	ENSG00000048405	0.0389553	6.22165	0.287062	0.775369	0.882993	-6.55668	NOT	ZNF800	zinc finger protein 800 [Source:HGNC Symbol;Acc:HGNC:27267]
565	ENSG00000048471	0.272427	5.29408	1.44466	0.155409	0.353016	-5.55212	NOT	SNX29	sorting nexin 29 [Source:HGNC Symbol;Acc:HGNC:30542]
566	ENSG00000048544	-0.0351667	4.24639	-0.338495	0.736548	0.859706	-6.44571	NOT	MRPS10	mitochondrial ribosomal protein S10 [Source:HGNC Symbol;Acc:HGNC:14502]
567	ENSG00000048545	0.736864	-3.34378	1.8455	0.0714816	0.230713	-4.25135	NOT	GUCA1A	guanylate cyclase activator 1A [Source:HGNC Symbol;Acc:HGNC:4678]
568	ENSG00000048649	0.25692	6.3285	1.93464	0.0592702	0.209019	-4.79569	NOT	RSF1	remodeling and spacing factor 1 [Source:HGNC Symbol;Acc:HGNC:18118]
569	ENSG00000048707	0.0152538	6.74409	0.10658	0.915591	0.960847	-6.59447	NOT	VPS13D	vacuolar protein sorting 13 homolog D [Source:HGNC Symbol;Acc:HGNC:23595]
570	ENSG00000048740	0.174734	9.19892	0.879827	0.383579	0.59545	-6.19144	NOT	CELF2	CUGBP Elav-like family member 2 [Source:HGNC Symbol;Acc:HGNC:2550]
571	ENSG00000048828	-0.295262	7.53032	-2.16074	0.0360196	0.162579	-4.36854	NOT	FAM120A	family with sequence similarity 120A [Source:HGNC Symbol;Acc:HGNC:13247]
572	ENSG00000048991	-0.209639	5.19682	-1.592	0.118313	0.30305	-5.33555	NOT	R3HDM1	R3H domain containing 1 [Source:HGNC Symbol;Acc:HGNC:9757]
573	ENSG00000049089	0.165081	4.41481	0.726073	0.471515	0.669274	-6.25518	NOT	COL9A2	collagen type IX alpha 2 chain [Source:HGNC Symbol;Acc:HGNC:2218]
574	ENSG00000049130	-0.012632	-2.84939	-0.0405829	0.967806	0.985009	-5.78629	NOT	KITLG	KIT ligand [Source:HGNC Symbol;Acc:HGNC:6343]
575	ENSG00000049167	-0.258546	2.83403	-1.75696	0.0856561	0.254147	-4.85694	NOT	ERCC8	ERCC excision repair 8, CSA ubiquitin ligase complex subunit [Source:HGNC Symbol;Acc:HGNC:3439]
576	ENSG00000049192	0.27067	1.70995	1.30469	0.198564	0.405854	-5.36123	NOT	ADAMTS6	ADAM metallopeptidase with thrombospondin type 1 motif 6 [Source:HGNC Symbol;Acc:HGNC:222]
577	ENSG00000049239	-0.646655	6.31922	-3.18243	0.00263353	0.0540447	-2.01887	NOT	H6PD	hexose-6-phosphate dehydrogenase/glucose 1-dehydrogenase [Source:HGNC Symbol;Acc:HGNC:4795]
578	ENSG00000049245	-0.160362	6.62429	-1.65557	0.104695	0.282817	-5.26526	NOT	VAMP3	vesicle associated membrane protein 3 [Source:HGNC Symbol;Acc:HGNC:12644]
579	ENSG00000049246	-0.0494789	3.81536	-0.267293	0.790452	0.891609	-6.42146	NOT	PER3	period circadian regulator 3 [Source:HGNC Symbol;Acc:HGNC:8847]
580	ENSG00000049247	-0.232552	3.28507	-0.606142	0.547435	0.72853	-6.2116	NOT	UTS2	urotensin 2 [Source:HGNC Symbol;Acc:HGNC:12636]
581	ENSG00000049249	0.996715	2.01194	2.98716	0.00452573	0.0660518	-2.2242	NOT	TNFRSF9	TNF receptor superfamily member 9 [Source:HGNC Symbol;Acc:HGNC:11924]
582	ENSG00000049283	-0.392907	-2.71382	-1.01131	0.317218	0.531141	-5.32627	NOT	EPN3	epsin 3 [Source:HGNC Symbol;Acc:HGNC:18235]
583	ENSG00000049323	0.457126	2.23553	1.35123	0.183308	0.387168	-5.36484	NOT	LTBP1	latent transforming growth factor beta binding protein 1 [Source:HGNC Symbol;Acc:HGNC:6714]
584	ENSG00000049449	-0.513455	1.39219	-2.00543	0.0508899	0.193247	-4.26917	NOT	RCN1	reticulocalbin 1 [Source:HGNC Symbol;Acc:HGNC:9934]
585	ENSG00000049540	0.669471	-2.58658	1.82977	0.0738449	0.234983	-4.30009	NOT	ELN	elastin [Source:HGNC Symbol;Acc:HGNC:3327]
586	ENSG00000049541	0.0353447	4.26558	0.25699	0.798346	0.896751	-6.47115	NOT	RFC2	replication factor C subunit 2 [Source:HGNC Symbol;Acc:HGNC:9970]
587	ENSG00000049618	0.118918	7.00368	0.6516	0.517939	0.705889	-6.3877	NOT	ARID1B	AT-rich interaction domain 1B [Source:HGNC Symbol;Acc:HGNC:18040]
588	ENSG00000049656	-0.220139	6.59727	-1.79664	0.0790374	0.24343	-5.03609	NOT	CLPTM1L	CLPTM1 like [Source:HGNC Symbol;Acc:HGNC:24308]
589	ENSG00000049759	0.349871	3.25178	1.44511	0.155282	0.352863	-5.36936	NOT	NEDD4L	NEDD4 like E3 ubiquitin protein ligase [Source:HGNC Symbol;Acc:HGNC:7728]
590	ENSG00000049768	-0.264512	2.72655	-1.45394	0.152829	0.350246	-5.29863	NOT	FOXP3	forkhead box P3 [Source:HGNC Symbol;Acc:HGNC:6106]
591	ENSG00000049769	-0.476558	3.49256	-2.52549	0.0151054	0.10937	-3.45523	NOT	PPP1R3F	protein phosphatase 1 regulatory subunit 3F [Source:HGNC Symbol;Acc:HGNC:14944]
592	ENSG00000049860	-0.23937	6.49373	-2.0988	0.0414174	0.17436	-4.49177	NOT	HEXB	hexosaminidase subunit beta [Source:HGNC Symbol;Acc:HGNC:4879]
593	ENSG00000049883	-0.472475	2.6874	-2.11896	0.0395877	0.170864	-4.20183	NOT	PTCD2	pentatricopeptide repeat domain 2 [Source:HGNC Symbol;Acc:HGNC:25734]
594	ENSG00000050030	0.447221	-0.127851	1.35162	0.183184	0.387093	-5.10741	NOT	NEXMIF	neurite extension and migration factor [Source:HGNC Symbol;Acc:HGNC:29433]
595	ENSG00000050165	0.138222	0.220839	0.401172	0.690173	0.830098	-5.92432	NOT	DKK3	dickkopf WNT signaling pathway inhibitor 3 [Source:HGNC Symbol;Acc:HGNC:2893]
596	ENSG00000050327	0.213971	1.46882	0.901085	0.372291	0.584476	-5.75594	NOT	ARHGEF5	Rho guanine nucleotide exchange factor 5 [Source:HGNC Symbol;Acc:HGNC:13209]
597	ENSG00000050344	-0.226044	3.52369	-1.51504	0.136683	0.32854	-5.30953	NOT	NFE2L3	nuclear factor, erythroid 2 like 3 [Source:HGNC Symbol;Acc:HGNC:7783]
598	ENSG00000050393	-0.279767	3.68116	-2.0186	0.0494496	0.190819	-4.50044	NOT	MCUR1	mitochondrial calcium uniporter regulator 1 [Source:HGNC Symbol;Acc:HGNC:21097]
599	ENSG00000050405	-0.287714	1.8464	-1.46065	0.150988	0.348067	-5.18121	NOT	LIMA1	LIM domain and actin binding 1 [Source:HGNC Symbol;Acc:HGNC:24636]
600	ENSG00000050426	-0.378821	6.07285	-2.82151	0.00706289	0.079395	-2.92112	NOT	LETMD1	LETM1 domain containing 1 [Source:HGNC Symbol;Acc:HGNC:24241]
601	ENSG00000050438	-0.288512	3.57768	-1.91008	0.0624415	0.214722	-4.68455	NOT	SLC4A8	solute carrier family 4 member 8 [Source:HGNC Symbol;Acc:HGNC:11034]
602	ENSG00000050555	-0.478282	0.893385	-1.37266	0.176592	0.379457	-5.19041	NOT	LAMC3	laminin subunit gamma 3 [Source:HGNC Symbol;Acc:HGNC:6494]
603	ENSG00000050628	-0.70807	2.38721	-2.75184	0.00848213	0.0848688	-2.83167	NOT	PTGER3	prostaglandin E receptor 3 [Source:HGNC Symbol;Acc:HGNC:9595]
604	ENSG00000050730	-0.0462277	0.558903	-0.149386	0.88191	0.942807	-6.02991	NOT	TNIP3	TNFAIP3 interacting protein 3 [Source:HGNC Symbol;Acc:HGNC:19315]
605	ENSG00000050748	-0.104975	5.2456	-1.07352	0.288703	0.503493	-6.00299	NOT	MAPK9	mitogen-activated protein kinase 9 [Source:HGNC Symbol;Acc:HGNC:6886]
606	ENSG00000050767	0.247234	0.912127	0.959401	0.34243	0.555206	-5.63705	NOT	COL23A1	collagen type XXIII alpha 1 chain [Source:HGNC Symbol;Acc:HGNC:22990]
607	ENSG00000050820	-0.444688	-3.17245	-1.05943	0.294998	0.510007	-5.26169	NOT	BCAR1	BCAR1 scaffold protein, Cas family member [Source:HGNC Symbol;Acc:HGNC:971]
608	ENSG00000051009	0.133269	6.23702	1.22269	0.227745	0.438966	-5.8604	NOT	FAM160A2	family with sequence similarity 160 member A2 [Source:HGNC Symbol;Acc:HGNC:25378]
609	ENSG00000051108	0.0295761	7.31805	0.26745	0.790332	0.891609	-6.56215	NOT	HERPUD1	homocysteine inducible ER protein with ubiquitin like domain 1 [Source:HGNC Symbol;Acc:HGNC:13744]
610	ENSG00000051128	-0.132744	2.89543	-0.749242	0.45757	0.658273	-6.06503	NOT	HOMER3	homer scaffold protein 3 [Source:HGNC Symbol;Acc:HGNC:17514]
611	ENSG00000051180	-0.0970816	1.50057	-0.552721	0.583162	0.754042	-6.00728	NOT	RAD51	RAD51 recombinase [Source:HGNC Symbol;Acc:HGNC:9817]
612	ENSG00000051341	-0.338205	0.368129	-1.33278	0.189244	0.394547	-5.18397	NOT	POLQ	DNA polymerase theta [Source:HGNC Symbol;Acc:HGNC:9186]
613	ENSG00000051382	0.402094	5.28786	2.84371	0.0066592	0.0775498	-2.84909	NOT	PIK3CB	phosphatidylinositol-4,5-bisphosphate 3-kinase catalytic subunit beta [Source:HGNC Symbol;Acc:HGNC:8976]
614	ENSG00000051523	-0.371651	9.92461	-1.96201	0.0558987	0.203038	-4.71233	NOT	CYBA	cytochrome b-245 alpha chain [Source:HGNC Symbol;Acc:HGNC:2577]
615	ENSG00000051596	-0.324676	2.99856	-1.65783	0.104237	0.282352	-5.03483	NOT	THOC3	THO complex 3 [Source:HGNC Symbol;Acc:HGNC:19072]
616	ENSG00000051620	-0.0999778	6.38383	-1.01517	0.315395	0.529415	-6.08793	NOT	HEBP2	heme binding protein 2 [Source:HGNC Symbol;Acc:HGNC:15716]
617	ENSG00000051825	-0.167408	5.32953	-1.08893	0.281922	0.495925	-5.9901	NOT	MPHOSPH9	M-phase phosphoprotein 9 [Source:HGNC Symbol;Acc:HGNC:7215]
618	ENSG00000052126	0.128302	2.40486	0.594638	0.555033	0.73332	-6.09898	NOT	PLEKHA5	pleckstrin homology domain containing A5 [Source:HGNC Symbol;Acc:HGNC:30036]
619	ENSG00000052344	-0.175672	-1.76873	-0.541952	0.590498	0.760522	-5.70789	NOT	PRSS8	serine protease 8 [Source:HGNC Symbol;Acc:HGNC:9491]
620	ENSG00000052723	0.0276815	4.70719	0.249816	0.803855	0.900253	-6.51056	NOT	SIKE1	suppressor of IKBKE 1 [Source:HGNC Symbol;Acc:HGNC:26119]
621	ENSG00000052749	0.362854	7.17759	1.59651	0.117302	0.30158	-5.35548	NOT	RRP12	ribosomal RNA processing 12 homolog [Source:HGNC Symbol;Acc:HGNC:29100]
14610	ENSG00000215244	4.39668	2.11673	6.1086	2.07e-07	0.000286536	6.91995	UP	LINC02649	long intergenic non-protein coding RNA 2649 [Source:HGNC Symbol;Acc:HGNC:54134]
623	ENSG00000052802	0.417133	3.86937	2.0264	0.0486131	0.18946	-4.50006	NOT	MSMO1	methylsterol monooxygenase 1 [Source:HGNC Symbol;Acc:HGNC:10545]
624	ENSG00000052841	-0.220697	6.89812	-1.68451	0.0989353	0.275149	-5.21935	NOT	TTC17	tetratricopeptide repeat domain 17 [Source:HGNC Symbol;Acc:HGNC:25596]
625	ENSG00000052850	0.0419294	-0.985042	0.179258	0.858532	0.930877	-5.87709	NOT	ALX4	ALX homeobox 4 [Source:HGNC Symbol;Acc:HGNC:450]
626	ENSG00000053108	0.829487	0.993994	2.62313	0.0118166	0.0982202	-2.98655	NOT	FSTL4	follistatin like 4 [Source:HGNC Symbol;Acc:HGNC:21389]
627	ENSG00000053254	-0.00856444	7.12455	-0.0677096	0.946314	0.974725	-6.59677	NOT	FOXN3	forkhead box N3 [Source:HGNC Symbol;Acc:HGNC:1928]
628	ENSG00000053328	0.652918	0.180373	2.14582	0.0372601	0.165689	-3.89368	NOT	METTL24	methyltransferase like 24 [Source:HGNC Symbol;Acc:HGNC:21566]
629	ENSG00000053371	-0.535631	4.10366	-2.74829	0.008561	0.0848688	-3.00581	NOT	AKR7A2	aldo-keto reductase family 7 member A2 [Source:HGNC Symbol;Acc:HGNC:389]
630	ENSG00000053372	-0.587821	3.4534	-2.73017	0.00897448	0.0866585	-2.98852	NOT	MRTO4	MRT4 homolog, ribosome maturation factor [Source:HGNC Symbol;Acc:HGNC:18477]
631	ENSG00000053501	-0.0499626	3.72043	-0.263591	0.793286	0.893515	-6.41144	NOT	USE1	unconventional SNARE in the ER 1 [Source:HGNC Symbol;Acc:HGNC:30882]
632	ENSG00000053524	0.461595	2.8277	2.09251	0.0420035	0.175167	-4.25845	NOT	MCF2L2	MCF.2 cell line derived transforming sequence-like 2 [Source:HGNC Symbol;Acc:HGNC:30319]
633	ENSG00000053747	0.619491	-2.15952	1.34838	0.184214	0.388047	-4.98822	NOT	LAMA3	laminin subunit alpha 3 [Source:HGNC Symbol;Acc:HGNC:6483]
634	ENSG00000053770	-0.120037	4.89875	-1.0219	0.312235	0.526105	-6.03801	NOT	AP5M1	adaptor related protein complex 5 subunit mu 1 [Source:HGNC Symbol;Acc:HGNC:20192]
635	ENSG00000053900	-0.22624	5.79936	-1.66312	0.103167	0.280717	-5.2451	NOT	ANAPC4	anaphase promoting complex subunit 4 [Source:HGNC Symbol;Acc:HGNC:19990]
636	ENSG00000053918	-0.0806259	5.58352	-0.582836	0.562883	0.739496	-6.41601	NOT	KCNQ1	potassium voltage-gated channel subfamily Q member 1 [Source:HGNC Symbol;Acc:HGNC:6294]
637	ENSG00000054116	-0.194504	5.16758	-1.54454	0.12939	0.319188	-5.40497	NOT	TRAPPC3	trafficking protein particle complex 3 [Source:HGNC Symbol;Acc:HGNC:19942]
638	ENSG00000054118	0.33004	7.11312	3.40971	0.00137294	0.042537	-1.41677	NOT	THRAP3	thyroid hormone receptor associated protein 3 [Source:HGNC Symbol;Acc:HGNC:22964]
639	ENSG00000054148	-0.295152	4.79568	-1.33055	0.189972	0.395391	-5.67897	NOT	PHPT1	phosphohistidine phosphatase 1 [Source:HGNC Symbol;Acc:HGNC:30033]
640	ENSG00000054179	0.871599	-0.177203	1.45638	0.15216	0.34964	-4.96576	NOT	ENTPD2	ectonucleoside triphosphate diphosphohydrolase 2 [Source:HGNC Symbol;Acc:HGNC:3364]
641	ENSG00000054267	0.744349	7.35505	3.17534	0.00268666	0.054532	-2.03816	NOT	ARID4B	AT-rich interaction domain 4B [Source:HGNC Symbol;Acc:HGNC:15550]
642	ENSG00000054277	-0.480843	1.44031	-1.64021	0.107862	0.2874	-4.87744	NOT	OPN3	opsin 3 [Source:HGNC Symbol;Acc:HGNC:14007]
643	ENSG00000054282	-0.182088	5.14894	-1.48767	0.14374	0.337749	-5.4863	NOT	SDCCAG8	serologically defined colon cancer antigen 8 [Source:HGNC Symbol;Acc:HGNC:10671]
644	ENSG00000054356	-0.512471	-1.09491	-1.41526	0.163804	0.363543	-4.96458	NOT	PTPRN	protein tyrosine phosphatase receptor type N [Source:HGNC Symbol;Acc:HGNC:9676]
645	ENSG00000054392	-0.00392451	2.58513	-0.0188151	0.985071	0.992784	-6.29843	NOT	HHAT	hedgehog acyltransferase [Source:HGNC Symbol;Acc:HGNC:18270]
646	ENSG00000054523	0.47392	5.87636	2.52948	0.0149564	0.108937	-3.59326	NOT	KIF1B	kinesin family member 1B [Source:HGNC Symbol;Acc:HGNC:16636]
13419	ENSG00000197632	4.26849	-0.00654857	5.35843	2.69e-06	0.00164152	4.46691	UP	SERPINB2	serpin family B member 2 [Source:HGNC Symbol;Acc:HGNC:8584]
648	ENSG00000054611	-0.166677	7.30423	-1.49198	0.142609	0.336424	-5.50804	NOT	TBC1D22A	TBC1 domain family member 22A [Source:HGNC Symbol;Acc:HGNC:1309]
649	ENSG00000054654	0.686129	5.71781	1.94889	0.0574942	0.205629	-4.75919	NOT	SYNE2	spectrin repeat containing nuclear envelope protein 2 [Source:HGNC Symbol;Acc:HGNC:17084]
650	ENSG00000054690	-0.158363	-2.29962	-0.523939	0.602866	0.769912	-5.68825	NOT	PLEKHH1	pleckstrin homology, MyTH4 and FERM domain containing H1 [Source:HGNC Symbol;Acc:HGNC:17733]
651	ENSG00000054793	0.583543	2.62822	2.34479	0.0234612	0.132729	-3.73725	NOT	ATP9A	ATPase phospholipid transporting 9A (putative) [Source:HGNC Symbol;Acc:HGNC:13540]
652	ENSG00000054938	-0.478465	-2.00083	-1.42989	0.159583	0.357693	-4.89928	NOT	CHRDL2	chordin like 2 [Source:HGNC Symbol;Acc:HGNC:24168]
653	ENSG00000054965	-0.133751	5.84306	-1.03416	0.306529	0.520518	-6.06207	NOT	FAM168A	family with sequence similarity 168 member A [Source:HGNC Symbol;Acc:HGNC:28999]
654	ENSG00000054967	0.514676	8.90452	1.75305	0.0863325	0.255138	-5.09113	NOT	RELT	RELT TNF receptor [Source:HGNC Symbol;Acc:HGNC:13764]
655	ENSG00000054983	0.314394	5.91441	2.62763	0.0116823	0.0976918	-3.37347	NOT	GALC	galactosylceramidase [Source:HGNC Symbol;Acc:HGNC:4115]
656	ENSG00000055044	0.158023	6.37627	0.840012	0.405297	0.614051	-6.24799	NOT	NOP58	NOP58 ribonucleoprotein [Source:HGNC Symbol;Acc:HGNC:29926]
657	ENSG00000055070	0.700266	2.74315	2.66293	0.0106752	0.0933153	-3.05883	NOT	SZRD1	SUZ RNA binding domain containing 1 [Source:HGNC Symbol;Acc:HGNC:30232]
658	ENSG00000055118	-0.0969981	2.0286	-0.377288	0.707715	0.840988	-6.15572	NOT	KCNH2	potassium voltage-gated channel subfamily H member 2 [Source:HGNC Symbol;Acc:HGNC:6251]
659	ENSG00000055130	-0.289475	6.78045	-2.36331	0.0224454	0.130405	-3.95949	NOT	CUL1	cullin 1 [Source:HGNC Symbol;Acc:HGNC:2551]
660	ENSG00000055147	-0.0555237	3.6602	-0.495267	0.622797	0.784582	-6.3171	NOT	FAM114A2	family with sequence similarity 114 member A2 [Source:HGNC Symbol;Acc:HGNC:1333]
661	ENSG00000055163	0.276015	7.1934	1.81277	0.0764725	0.239411	-5.00817	NOT	CYFIP2	cytoplasmic FMR1 interacting protein 2 [Source:HGNC Symbol;Acc:HGNC:13760]
662	ENSG00000055208	0.363903	7.10062	2.86902	0.00622521	0.0751303	-2.80976	NOT	TAB2	TGF-beta activated kinase 1 (MAP3K7) binding protein 2 [Source:HGNC Symbol;Acc:HGNC:17075]
663	ENSG00000055211	0.358352	4.28196	2.22574	0.0310312	0.152013	-4.15563	NOT	GINM1	glycoprotein integral membrane 1 [Source:HGNC Symbol;Acc:HGNC:21074]
664	ENSG00000055332	0.216344	6.22698	1.40766	0.166031	0.366283	-5.62535	NOT	EIF2AK2	eukaryotic translation initiation factor 2 alpha kinase 2 [Source:HGNC Symbol;Acc:HGNC:9437]
665	ENSG00000055483	0.158072	7.42032	0.640371	0.525145	0.711339	-6.39266	NOT	USP36	ubiquitin specific peptidase 36 [Source:HGNC Symbol;Acc:HGNC:20062]
666	ENSG00000055609	0.790688	7.66628	3.14583	0.00291869	0.0565245	-2.11271	NOT	KMT2C	lysine methyltransferase 2C [Source:HGNC Symbol;Acc:HGNC:13726]
667	ENSG00000055917	0.217249	7.29638	1.50602	0.138979	0.331673	-5.4884	NOT	PUM2	pumilio RNA binding family member 2 [Source:HGNC Symbol;Acc:HGNC:14958]
668	ENSG00000055950	-0.410259	4.2738	-2.34923	0.023214	0.132045	-3.90605	NOT	MRPL43	mitochondrial ribosomal protein L43 [Source:HGNC Symbol;Acc:HGNC:14517]
669	ENSG00000055955	-0.118146	-0.0710424	-0.421981	0.675027	0.820239	-5.88908	NOT	ITIH4	inter-alpha-trypsin inhibitor heavy chain 4 [Source:HGNC Symbol;Acc:HGNC:6169]
670	ENSG00000055957	-0.351681	-0.625262	-1.03439	0.306422	0.520482	-5.42178	NOT	ITIH1	inter-alpha-trypsin inhibitor heavy chain 1 [Source:HGNC Symbol;Acc:HGNC:6166]
671	ENSG00000056050	-0.256762	2.73865	-1.35519	0.182051	0.385573	-5.43155	NOT	HPF1	histone PARylation factor 1 [Source:HGNC Symbol;Acc:HGNC:26051]
672	ENSG00000056097	0.169536	6.45132	1.12414	0.266854	0.481081	-5.97446	NOT	ZFR	zinc finger RNA binding protein [Source:HGNC Symbol;Acc:HGNC:17277]
673	ENSG00000056277	0.0775349	2.96189	0.468596	0.641597	0.797343	-6.2401	NOT	ZNF280C	zinc finger protein 280C [Source:HGNC Symbol;Acc:HGNC:25955]
674	ENSG00000056291	0.0456251	-3.72343	0.112778	0.910703	0.958825	-5.74305	NOT	NPFFR2	neuropeptide FF receptor 2 [Source:HGNC Symbol;Acc:HGNC:4525]
675	ENSG00000056487	-0.0687637	-3.02937	-0.161947	0.872065	0.937971	-5.76636	NOT	PHF21B	PHD finger protein 21B [Source:HGNC Symbol;Acc:HGNC:25161]
676	ENSG00000056558	-0.0702699	6.92612	-0.469606	0.640881	0.796935	-6.48939	NOT	TRAF1	TNF receptor associated factor 1 [Source:HGNC Symbol;Acc:HGNC:12031]
677	ENSG00000056586	0.0024689	6.3498	0.0205956	0.983658	0.992518	-6.59879	NOT	RC3H2	ring finger and CCCH-type domains 2 [Source:HGNC Symbol;Acc:HGNC:21461]
678	ENSG00000056736	-0.247085	1.84424	-1.11843	0.269256	0.48341	-5.5974	NOT	IL17RB	interleukin 17 receptor B [Source:HGNC Symbol;Acc:HGNC:18015]
679	ENSG00000056972	0.184728	-0.0287013	0.536747	0.594059	0.763085	-5.8373	NOT	TRAF3IP2	TRAF3 interacting protein 2 [Source:HGNC Symbol;Acc:HGNC:1343]
680	ENSG00000057019	-0.348779	-0.625012	-1.61358	0.113537	0.295902	-4.72347	NOT	DCBLD2	discoidin, CUB and LCCL domain containing 2 [Source:HGNC Symbol;Acc:HGNC:24627]
681	ENSG00000057252	0.130797	6.3988	1.0827	0.284649	0.498858	-6.01883	NOT	SOAT1	sterol O-acyltransferase 1 [Source:HGNC Symbol;Acc:HGNC:11177]
682	ENSG00000057294	-0.383918	1.56753	-1.56561	0.124372	0.311774	-5.00132	NOT	PKP2	plakophilin 2 [Source:HGNC Symbol;Acc:HGNC:9024]
683	ENSG00000057468	-0.363403	-0.0692604	-1.6986	0.0962282	0.270782	-4.6397	NOT	MSH4	mutS homolog 4 [Source:HGNC Symbol;Acc:HGNC:7327]
684	ENSG00000057593	-0.620476	-3.09892	-1.81684	0.0758362	0.23843	-4.30786	NOT	F7	coagulation factor VII [Source:HGNC Symbol;Acc:HGNC:3544]
685	ENSG00000057608	-0.259522	7.52919	-1.82857	0.074028	0.235202	-4.9786	NOT	GDI2	GDP dissociation inhibitor 2 [Source:HGNC Symbol;Acc:HGNC:4227]
686	ENSG00000057657	0.414825	-2.34376	0.986291	0.32921	0.542395	-5.36233	NOT	PRDM1	PR/SET domain 1 [Source:HGNC Symbol;Acc:HGNC:9346]
687	ENSG00000057663	0.165097	5.28424	1.42934	0.159742	0.357856	-5.57325	NOT	ATG5	autophagy related 5 [Source:HGNC Symbol;Acc:HGNC:589]
14123	ENSG00000206172	4.23756	5.89039	2.87895	0.00606214	0.0743113	-2.7169	UP	HBA1	hemoglobin subunit alpha 1 [Source:HGNC Symbol;Acc:HGNC:4823]
689	ENSG00000057757	0.0802152	5.60047	0.594741	0.554965	0.733303	-6.4095	NOT	PITHD1	PITH domain containing 1 [Source:HGNC Symbol;Acc:HGNC:25022]
690	ENSG00000057935	-0.318042	4.301	-2.74379	0.00866199	0.0851893	-3.03253	NOT	MTA3	metastasis associated 1 family member 3 [Source:HGNC Symbol;Acc:HGNC:23784]
691	ENSG00000058056	-0.090029	2.99139	-0.653136	0.516958	0.705359	-6.14362	NOT	USP13	ubiquitin specific peptidase 13 [Source:HGNC Symbol;Acc:HGNC:12611]
692	ENSG00000058063	0.9818	7.1634	3.87915	0.000335588	0.0235731	-0.0956743	NOT	ATP11B	ATPase phospholipid transporting 11B (putative) [Source:HGNC Symbol;Acc:HGNC:13553]
693	ENSG00000058085	0.363852	-3.17124	1.43219	0.158928	0.357287	-4.8447	NOT	LAMC2	laminin subunit gamma 2 [Source:HGNC Symbol;Acc:HGNC:6493]
1104	ENSG00000073756	4.21336	3.6674	3.92724	0.000289242	0.0226177	0.225821	UP	PTGS2	prostaglandin-endoperoxide synthase 2 [Source:HGNC Symbol;Acc:HGNC:9605]
695	ENSG00000058262	0.0131609	4.07538	0.052622	0.958264	0.980562	-6.48402	NOT	SEC61A1	SEC61 translocon subunit alpha 1 [Source:HGNC Symbol;Acc:HGNC:18276]
696	ENSG00000058272	0.732118	6.0549	2.31148	0.0253921	0.137239	-4.06295	NOT	PPP1R12A	protein phosphatase 1 regulatory subunit 12A [Source:HGNC Symbol;Acc:HGNC:7618]
697	ENSG00000058335	-0.312786	-0.480251	-1.36228	0.179819	0.383211	-5.07173	NOT	RASGRF1	Ras protein specific guanine nucleotide releasing factor 1 [Source:HGNC Symbol;Acc:HGNC:9875]
698	ENSG00000058404	0.183238	-2.4486	0.456844	0.649958	0.802983	-5.70915	NOT	CAMK2B	calcium/calmodulin dependent protein kinase II beta [Source:HGNC Symbol;Acc:HGNC:1461]
699	ENSG00000058453	-0.467895	6.49535	-2.67024	0.0104768	0.0925802	-3.28034	NOT	CROCC	ciliary rootlet coiled-coil, rootletin [Source:HGNC Symbol;Acc:HGNC:21299]
700	ENSG00000058600	-0.0427169	6.71438	-0.185645	0.853548	0.927928	-6.58282	NOT	POLR3E	RNA polymerase III subunit E [Source:HGNC Symbol;Acc:HGNC:30347]
701	ENSG00000058668	-0.490864	6.84523	-2.11454	0.0399833	0.17154	-4.46126	NOT	ATP2B4	ATPase plasma membrane Ca2+ transporting 4 [Source:HGNC Symbol;Acc:HGNC:817]
702	ENSG00000058799	-0.112162	4.60572	-0.811949	0.421051	0.626857	-6.20704	NOT	YIPF1	Yip1 domain family member 1 [Source:HGNC Symbol;Acc:HGNC:25231]
703	ENSG00000058804	-0.115597	3.83686	-0.944989	0.349659	0.562278	-6.01925	NOT	NDC1	NDC1 transmembrane nucleoporin [Source:HGNC Symbol;Acc:HGNC:25525]
704	ENSG00000058866	-0.165714	4.15075	-0.830869	0.410389	0.618227	-6.1517	NOT	DGKG	diacylglycerol kinase gamma [Source:HGNC Symbol;Acc:HGNC:2853]
705	ENSG00000059122	-0.408463	6.13037	-2.08652	0.0425686	0.176421	-4.51222	NOT	FLYWCH1	FLYWCH-type zinc finger 1 [Source:HGNC Symbol;Acc:HGNC:25404]
706	ENSG00000059145	-0.108362	6.48874	-0.886706	0.379903	0.591639	-6.20855	NOT	UNKL	unk like zinc finger [Source:HGNC Symbol;Acc:HGNC:14184]
707	ENSG00000059377	-0.321754	7.82374	-1.83545	0.0729841	0.233392	-4.96429	NOT	TBXAS1	thromboxane A synthase 1 [Source:HGNC Symbol;Acc:HGNC:11609]
708	ENSG00000059378	-0.343713	7.26567	-2.22567	0.0310366	0.152013	-4.24121	NOT	PARP12	poly(ADP-ribose) polymerase family member 12 [Source:HGNC Symbol;Acc:HGNC:21919]
709	ENSG00000059573	-0.429643	3.64492	-1.80911	0.0770481	0.240204	-4.86588	NOT	ALDH18A1	aldehyde dehydrogenase 18 family member A1 [Source:HGNC Symbol;Acc:HGNC:9722]
710	ENSG00000059588	-0.478486	5.82047	-2.50747	0.0157966	0.111574	-3.64067	NOT	TARBP1	TAR (HIV-1) RNA binding protein 1 [Source:HGNC Symbol;Acc:HGNC:11568]
711	ENSG00000059691	-0.464532	3.19225	-2.8314	0.00688041	0.0788584	-2.72437	NOT	GATB	glutamyl-tRNA amidotransferase subunit B [Source:HGNC Symbol;Acc:HGNC:8849]
11694	ENSG00000178803	4.18728	2.55978	5.03551	7.99e-06	0.0033805	3.57942	UP	ADORA2A-AS1	ADORA2A antisense RNA 1 [Source:HGNC Symbol;Acc:HGNC:37122]
713	ENSG00000059758	0.45939	6.27332	2.06015	0.0451336	0.181815	-4.56413	NOT	CDK17	cyclin dependent kinase 17 [Source:HGNC Symbol;Acc:HGNC:8750]
2879	ENSG00000106366	4.11154	-0.259371	6.63266	3.42e-08	7.08e-05	8.29268	UP	SERPINE1	serpin family E member 1 [Source:HGNC Symbol;Acc:HGNC:8583]
715	ENSG00000059915	0.481166	3.41701	1.9866	0.0530118	0.196866	-4.52215	NOT	PSD	pleckstrin and Sec7 domain containing [Source:HGNC Symbol;Acc:HGNC:9507]
716	ENSG00000060069	0.415462	6.47025	3.21336	0.00241328	0.0520917	-1.94028	NOT	CTDP1	CTD phosphatase subunit 1 [Source:HGNC Symbol;Acc:HGNC:2498]
717	ENSG00000060138	-0.289307	7.52281	-0.987241	0.328749	0.541979	-6.11242	NOT	YBX3	Y-box binding protein 3 [Source:HGNC Symbol;Acc:HGNC:2428]
718	ENSG00000060140	-0.350675	0.717882	-1.10192	0.276295	0.490607	-5.4829	NOT	STYK1	serine/threonine/tyrosine kinase 1 [Source:HGNC Symbol;Acc:HGNC:18889]
719	ENSG00000060237	-0.153763	7.77016	-1.02885	0.308993	0.522946	-6.06938	NOT	WNK1	WNK lysine deficient protein kinase 1 [Source:HGNC Symbol;Acc:HGNC:14540]
720	ENSG00000060339	-0.243495	6.94436	-1.74031	0.0885681	0.259334	-5.12923	NOT	CCAR1	cell division cycle and apoptosis regulator 1 [Source:HGNC Symbol;Acc:HGNC:24236]
721	ENSG00000060491	-0.235757	7.74551	-1.6747	0.100858	0.277648	-5.22984	NOT	OGFR	opioid growth factor receptor [Source:HGNC Symbol;Acc:HGNC:15768]
722	ENSG00000060558	0.949288	5.56791	2.95302	0.00496602	0.0680144	-2.58745	NOT	GNA15	G protein subunit alpha 15 [Source:HGNC Symbol;Acc:HGNC:4383]
723	ENSG00000060566	-0.115541	-2.58878	-0.285598	0.776483	0.883334	-5.76268	NOT	CREB3L3	cAMP responsive element binding protein 3 like 3 [Source:HGNC Symbol;Acc:HGNC:18855]
724	ENSG00000060642	0.0358687	2.99205	0.298312	0.766824	0.877825	-6.30866	NOT	PIGV	phosphatidylinositol glycan anchor biosynthesis class V [Source:HGNC Symbol;Acc:HGNC:26031]
725	ENSG00000060656	-0.11123	-0.701903	-0.432328	0.667546	0.815033	-5.82695	NOT	PTPRU	protein tyrosine phosphatase receptor type U [Source:HGNC Symbol;Acc:HGNC:9683]
726	ENSG00000060688	-0.0042871	5.00205	-0.0405261	0.967851	0.985009	-6.56017	NOT	SNRNP40	small nuclear ribonucleoprotein U5 subunit 40 [Source:HGNC Symbol;Acc:HGNC:30857]
727	ENSG00000060709	0.0266735	-1.76066	0.0548735	0.95648	0.97979	-5.84287	NOT	RIMBP2	RIMS binding protein 2 [Source:HGNC Symbol;Acc:HGNC:30339]
728	ENSG00000060718	0.493127	-2.74282	1.13293	0.26318	0.476771	-5.20295	NOT	COL11A1	collagen type XI alpha 1 chain [Source:HGNC Symbol;Acc:HGNC:2186]
729	ENSG00000060749	-0.141117	4.16902	-0.9029	0.371337	0.583828	-6.09211	NOT	QSER1	glutamine and serine rich 1 [Source:HGNC Symbol;Acc:HGNC:26154]
730	ENSG00000060762	0.190022	5.52829	1.37589	0.175595	0.378273	-5.65405	NOT	MPC1	mitochondrial pyruvate carrier 1 [Source:HGNC Symbol;Acc:HGNC:21606]
731	ENSG00000060971	-0.217495	6.28992	-1.58548	0.119789	0.304946	-5.37137	NOT	ACAA1	acetyl-CoA acyltransferase 1 [Source:HGNC Symbol;Acc:HGNC:82]
732	ENSG00000060982	0.0387664	2.36285	0.177252	0.860097	0.931494	-6.25248	NOT	BCAT1	branched chain amino acid transaminase 1 [Source:HGNC Symbol;Acc:HGNC:976]
733	ENSG00000061273	-0.373955	7.27214	-2.48671	0.0166287	0.113546	-3.69252	NOT	HDAC7	histone deacetylase 7 [Source:HGNC Symbol;Acc:HGNC:14067]
734	ENSG00000061337	-0.116696	-0.36874	-0.347376	0.729911	0.854919	-5.88678	NOT	LZTS1	leucine zipper tumor suppressor 1 [Source:HGNC Symbol;Acc:HGNC:13861]
735	ENSG00000061455	0.288275	-3.6867	0.737331	0.464709	0.663705	-5.50047	NOT	PRDM6	PR/SET domain 6 [Source:HGNC Symbol;Acc:HGNC:9350]
736	ENSG00000061656	0.844431	2.30477	1.93797	0.058851	0.208108	-4.47393	NOT	SPAG4	sperm associated antigen 4 [Source:HGNC Symbol;Acc:HGNC:11214]
737	ENSG00000061676	0.190301	2.13248	0.785385	0.436301	0.640209	-5.9342	NOT	NCKAP1	NCK associated protein 1 [Source:HGNC Symbol;Acc:HGNC:7666]
738	ENSG00000061794	-0.220493	4.40664	-2.05077	0.0460786	0.184083	-4.50867	NOT	MRPS35	mitochondrial ribosomal protein S35 [Source:HGNC Symbol;Acc:HGNC:16635]
739	ENSG00000061918	-0.0186005	1.77002	-0.0594636	0.952843	0.978047	-6.18857	NOT	GUCY1B1	guanylate cyclase 1 soluble subunit beta 1 [Source:HGNC Symbol;Acc:HGNC:4687]
740	ENSG00000061936	-0.198194	7.08092	-2.22629	0.0309919	0.152003	-4.24106	NOT	SFSWAP	splicing factor SWAP [Source:HGNC Symbol;Acc:HGNC:10790]
741	ENSG00000061938	-0.577074	8.3497	-3.20507	0.00247056	0.0524772	-1.95174	NOT	TNK2	tyrosine kinase non receptor 2 [Source:HGNC Symbol;Acc:HGNC:19297]
742	ENSG00000061987	0.114424	6.39232	0.723982	0.472785	0.669773	-6.33789	NOT	MON2	MON2 homolog, regulator of endosome-to-Golgi trafficking [Source:HGNC Symbol;Acc:HGNC:29177]
743	ENSG00000062038	0.0141713	-1.22434	0.0379142	0.969922	0.985715	-5.87552	NOT	CDH3	cadherin 3 [Source:HGNC Symbol;Acc:HGNC:1762]
744	ENSG00000062194	0.285817	7.31713	2.64466	0.0111859	0.0951532	-3.33875	NOT	GPBP1	GC-rich promoter binding protein 1 [Source:HGNC Symbol;Acc:HGNC:29520]
16868	ENSG00000244242	4.1096	0.0925153	5.34887	2.78e-06	0.00164712	4.44529	UP	IFITM10	interferon induced transmembrane protein 10 [Source:HGNC Symbol;Acc:HGNC:40022]
746	ENSG00000062370	-0.474933	-2.59672	-1.48666	0.144006	0.338063	-4.80013	NOT	ZNF112	zinc finger protein 112 [Source:HGNC Symbol;Acc:HGNC:12892]
747	ENSG00000062485	-0.219152	6.70623	-1.91228	0.0621521	0.214123	-4.83642	NOT	CS	citrate synthase [Source:HGNC Symbol;Acc:HGNC:2422]
748	ENSG00000062524	-0.414422	4.13565	-1.14765	0.257116	0.470883	-5.84422	NOT	LTK	leukocyte receptor tyrosine kinase [Source:HGNC Symbol;Acc:HGNC:6721]
749	ENSG00000062598	0.524072	2.69246	1.81536	0.0760662	0.238816	-4.73509	NOT	ELMO2	engulfment and cell motility 2 [Source:HGNC Symbol;Acc:HGNC:17233]
750	ENSG00000062650	0.230362	6.39612	2.11402	0.0400296	0.17154	-4.46249	NOT	WAPL	WAPL cohesin release factor [Source:HGNC Symbol;Acc:HGNC:23293]
751	ENSG00000062716	0.254563	8.00267	1.21709	0.229849	0.441112	-5.8614	NOT	VMP1	vacuole membrane protein 1 [Source:HGNC Symbol;Acc:HGNC:29559]
752	ENSG00000062725	-0.0040177	5.12472	-0.0446604	0.964574	0.983366	-6.5665	NOT	APPBP2	amyloid beta precursor protein binding protein 2 [Source:HGNC Symbol;Acc:HGNC:622]
753	ENSG00000062822	-0.270127	4.51451	-2.21828	0.031571	0.15298	-4.19257	NOT	POLD1	DNA polymerase delta 1, catalytic subunit [Source:HGNC Symbol;Acc:HGNC:9175]
754	ENSG00000063046	0.328159	1.63121	1.46889	0.148748	0.344744	-5.13787	NOT	EIF4B	eukaryotic translation initiation factor 4B [Source:HGNC Symbol;Acc:HGNC:3285]
755	ENSG00000063127	-0.402423	3.61067	-2.17162	0.0351389	0.160988	-4.20279	NOT	SLC6A16	solute carrier family 6 member 16 [Source:HGNC Symbol;Acc:HGNC:13622]
756	ENSG00000063176	-0.346615	3.4744	-2.67205	0.0104284	0.0924283	-3.1243	NOT	SPHK2	sphingosine kinase 2 [Source:HGNC Symbol;Acc:HGNC:18859]
757	ENSG00000063177	-0.410572	9.66399	-2.10079	0.0412342	0.173882	-4.45823	NOT	RPL18	ribosomal protein L18 [Source:HGNC Symbol;Acc:HGNC:10310]
758	ENSG00000063241	-0.663484	2.80778	-2.89339	0.00583227	0.0728928	-2.53856	NOT	ISOC2	isochorismatase domain containing 2 [Source:HGNC Symbol;Acc:HGNC:26278]
759	ENSG00000063244	-0.318718	6.00314	-2.66303	0.0106725	0.0933153	-3.29341	NOT	U2AF2	U2 small nuclear RNA auxiliary factor 2 [Source:HGNC Symbol;Acc:HGNC:23156]
760	ENSG00000063245	-0.245567	6.99979	-1.98743	0.0529174	0.196802	-4.70041	NOT	EPN1	epsin 1 [Source:HGNC Symbol;Acc:HGNC:21604]
761	ENSG00000063322	0.0251149	5.81609	0.226388	0.821914	0.909802	-6.56602	NOT	MED29	mediator complex subunit 29 [Source:HGNC Symbol;Acc:HGNC:23074]
762	ENSG00000063587	-0.188196	4.37521	-0.944673	0.349818	0.562413	-6.07364	NOT	ZNF275	zinc finger protein 275 [Source:HGNC Symbol;Acc:HGNC:13069]
763	ENSG00000063601	-0.0089307	6.17924	-0.0678067	0.946237	0.974725	-6.59521	NOT	MTMR1	myotubularin related protein 1 [Source:HGNC Symbol;Acc:HGNC:7449]
764	ENSG00000063660	-0.445583	0.135103	-1.68882	0.0981013	0.273835	-4.67259	NOT	GPC1	glypican 1 [Source:HGNC Symbol;Acc:HGNC:4449]
765	ENSG00000063761	-0.426119	3.85124	-3.16631	0.00275574	0.0553875	-1.95507	NOT	ADCK1	aarF domain containing kinase 1 [Source:HGNC Symbol;Acc:HGNC:19038]
766	ENSG00000063854	-0.383534	5.65661	-1.93204	0.059599	0.209549	-4.78941	NOT	HAGH	hydroxyacylglutathione hydrolase [Source:HGNC Symbol;Acc:HGNC:4805]
767	ENSG00000063978	-0.12633	6.61267	-1.24141	0.22082	0.430875	-5.83975	NOT	RNF4	ring finger protein 4 [Source:HGNC Symbol;Acc:HGNC:10067]
768	ENSG00000064012	-0.0996812	8.18355	-0.803991	0.425586	0.630423	-6.26802	NOT	CASP8	caspase 8 [Source:HGNC Symbol;Acc:HGNC:1509]
769	ENSG00000064042	0.0797757	-0.781015	0.206091	0.83764	0.918439	-5.88656	NOT	LIMCH1	LIM and calponin homology domains 1 [Source:HGNC Symbol;Acc:HGNC:29191]
770	ENSG00000064102	0.284	4.0754	1.79155	0.0798607	0.244912	-4.93567	NOT	INTS13	integrator complex subunit 13 [Source:HGNC Symbol;Acc:HGNC:20174]
771	ENSG00000064115	-0.385846	3.95147	-1.21898	0.229137	0.440211	-5.74425	NOT	TM7SF3	transmembrane 7 superfamily member 3 [Source:HGNC Symbol;Acc:HGNC:23049]
772	ENSG00000064199	-0.100878	-2.85066	-0.299333	0.76605	0.877555	-5.74589	NOT	SPA17	sperm autoantigenic protein 17 [Source:HGNC Symbol;Acc:HGNC:11210]
773	ENSG00000064201	-0.66465	7.2771	-3.1059	0.00326296	0.0584283	-2.2164	NOT	TSPAN32	tetraspanin 32 [Source:HGNC Symbol;Acc:HGNC:13410]
774	ENSG00000064225	0.133471	4.1915	0.666925	0.50819	0.698611	-6.2752	NOT	ST3GAL6	ST3 beta-galactoside alpha-2,3-sialyltransferase 6 [Source:HGNC Symbol;Acc:HGNC:18080]
775	ENSG00000064270	0.347459	0.889122	0.843855	0.403168	0.612218	-5.73262	NOT	ATP2C2	ATPase secretory pathway Ca2+ transporting 2 [Source:HGNC Symbol;Acc:HGNC:29103]
776	ENSG00000064309	-0.407651	-0.820032	-1.77822	0.0820543	0.248368	-4.46322	NOT	CDON	cell adhesion associated, oncogene regulated [Source:HGNC Symbol;Acc:HGNC:17104]
777	ENSG00000064313	0.217632	5.648	1.53275	0.132266	0.322712	-5.43912	NOT	TAF2	TATA-box binding protein associated factor 2 [Source:HGNC Symbol;Acc:HGNC:11536]
778	ENSG00000064393	0.211254	6.9333	1.09341	0.279973	0.494173	-6.00805	NOT	HIPK2	homeodomain interacting protein kinase 2 [Source:HGNC Symbol;Acc:HGNC:14402]
779	ENSG00000064419	-0.0930793	6.17784	-1.02735	0.30969	0.523612	-6.07408	NOT	TNPO3	transportin 3 [Source:HGNC Symbol;Acc:HGNC:17103]
780	ENSG00000064489	-0.316674	2.90415	-1.4781	0.146274	0.341377	-5.28768	NOT	BORCS8-MEF2B	BORCS8-MEF2B readthrough [Source:HGNC Symbol;Acc:HGNC:39979]
781	ENSG00000064490	-0.158744	5.03339	-0.796672	0.429781	0.633603	-6.24706	NOT	RFXANK	regulatory factor X associated ankyrin containing protein [Source:HGNC Symbol;Acc:HGNC:9987]
782	ENSG00000064545	-0.618189	3.78643	-2.90447	0.00566128	0.0720596	-2.60512	NOT	TMEM161A	transmembrane protein 161A [Source:HGNC Symbol;Acc:HGNC:26020]
783	ENSG00000064547	0.0610027	6.53796	0.193655	0.847309	0.92381	-6.58115	NOT	LPAR2	lysophosphatidic acid receptor 2 [Source:HGNC Symbol;Acc:HGNC:3168]
784	ENSG00000064601	-0.24539	7.27939	-1.56313	0.124955	0.312758	-5.40444	NOT	CTSA	cathepsin A [Source:HGNC Symbol;Acc:HGNC:9251]
785	ENSG00000064607	-0.546719	7.65005	-3.66428	0.000645844	0.0320803	-0.70824	NOT	SUGP2	SURP and G-patch domain containing 2 [Source:HGNC Symbol;Acc:HGNC:18641]
786	ENSG00000064651	0.256882	3.20461	1.35299	0.182748	0.386576	-5.4875	NOT	SLC12A2	solute carrier family 12 member 2 [Source:HGNC Symbol;Acc:HGNC:10911]
787	ENSG00000064652	-0.237773	3.27813	-1.55849	0.126049	0.314661	-5.21762	NOT	SNX24	sorting nexin 24 [Source:HGNC Symbol;Acc:HGNC:21533]
788	ENSG00000064655	0.161004	-1.03026	0.361191	0.719629	0.848439	-5.82615	NOT	EYA2	EYA transcriptional coactivator and phosphatase 2 [Source:HGNC Symbol;Acc:HGNC:3520]
789	ENSG00000064666	-0.189319	8.42701	-1.11628	0.270164	0.48437	-5.97045	NOT	CNN2	calponin 2 [Source:HGNC Symbol;Acc:HGNC:2156]
790	ENSG00000064687	-0.454655	8.01828	-2.0086	0.0505396	0.192692	-4.65393	NOT	ABCA7	ATP binding cassette subfamily A member 7 [Source:HGNC Symbol;Acc:HGNC:37]
791	ENSG00000064692	-0.0875868	-2.70644	-0.218983	0.827644	0.913227	-5.77197	NOT	SNCAIP	synuclein alpha interacting protein [Source:HGNC Symbol;Acc:HGNC:11139]
792	ENSG00000064703	0.0411802	4.11009	0.28459	0.777251	0.883799	-6.44837	NOT	DDX20	DEAD-box helicase 20 [Source:HGNC Symbol;Acc:HGNC:2743]
793	ENSG00000064763	0.0266669	4.65013	0.106285	0.915824	0.961042	-6.53179	NOT	FAR2	fatty acyl-CoA reductase 2 [Source:HGNC Symbol;Acc:HGNC:25531]
794	ENSG00000064787	-0.0776485	0.488246	-0.244283	0.808111	0.902342	-6.00415	NOT	BCAS1	breast carcinoma amplified sequence 1 [Source:HGNC Symbol;Acc:HGNC:974]
795	ENSG00000064835	-0.460141	-2.0941	-1.24296	0.220254	0.430243	-5.11898	NOT	POU1F1	POU class 1 homeobox 1 [Source:HGNC Symbol;Acc:HGNC:9210]
796	ENSG00000064886	-0.156619	2.7016	-0.905666	0.369886	0.582254	-5.91404	NOT	CHI3L2	chitinase 3 like 2 [Source:HGNC Symbol;Acc:HGNC:1933]
797	ENSG00000064932	0.0785797	8.21355	0.389781	0.698518	0.835818	-6.51373	NOT	SBNO2	strawberry notch homolog 2 [Source:HGNC Symbol;Acc:HGNC:29158]
798	ENSG00000064933	-0.336862	4.28535	-2.25613	0.0289168	0.14701	-4.09854	NOT	PMS1	PMS1 homolog 1, mismatch repair system component [Source:HGNC Symbol;Acc:HGNC:9121]
799	ENSG00000064961	0.0378619	6.17266	0.21767	0.82866	0.913377	-6.57372	NOT	HMG20B	high mobility group 20B [Source:HGNC Symbol;Acc:HGNC:5002]
800	ENSG00000064995	0.069542	3.61512	0.359003	0.721254	0.84963	-6.36859	NOT	TAF11	TATA-box binding protein associated factor 11 [Source:HGNC Symbol;Acc:HGNC:11544]
801	ENSG00000064999	-0.110264	5.44768	-0.815227	0.419192	0.625539	-6.25052	NOT	ANKS1A	ankyrin repeat and sterile alpha motif domain containing 1A [Source:HGNC Symbol;Acc:HGNC:20961]
802	ENSG00000065000	-0.524427	7.34703	-3.37822	0.00150457	0.0437013	-1.50001	NOT	AP3D1	adaptor related protein complex 3 subunit delta 1 [Source:HGNC Symbol;Acc:HGNC:568]
803	ENSG00000065029	-0.285134	5.78997	-2.23668	0.0302547	0.149927	-4.21264	NOT	ZNF76	zinc finger protein 76 [Source:HGNC Symbol;Acc:HGNC:13149]
804	ENSG00000065054	-0.679921	1.86076	-3.09001	0.00341023	0.0591668	-1.97203	NOT	SLC9A3R2	SLC9A3 regulator 2 [Source:HGNC Symbol;Acc:HGNC:11076]
805	ENSG00000065057	-0.530879	2.44917	-2.21335	0.0319324	0.15392	-3.99255	NOT	NTHL1	nth like DNA glycosylase 1 [Source:HGNC Symbol;Acc:HGNC:8028]
806	ENSG00000065060	0.101376	4.66443	0.628935	0.532538	0.717449	-6.34118	NOT	UHRF1BP1	UHRF1 binding protein 1 [Source:HGNC Symbol;Acc:HGNC:21216]
807	ENSG00000065135	0.251016	6.50175	2.0857	0.0426463	0.17649	-4.51727	NOT	GNAI3	G protein subunit alpha i3 [Source:HGNC Symbol;Acc:HGNC:4387]
808	ENSG00000065150	-0.231268	5.69228	-2.17654	0.0347463	0.160217	-4.33062	NOT	IPO5	importin 5 [Source:HGNC Symbol;Acc:HGNC:6402]
809	ENSG00000065154	0.17874	5.22098	1.16588	0.24974	0.462477	-5.90056	NOT	OAT	ornithine aminotransferase [Source:HGNC Symbol;Acc:HGNC:8091]
810	ENSG00000065183	-0.261632	1.94744	-1.04825	0.300062	0.514682	-5.68324	NOT	WDR3	WD repeat domain 3 [Source:HGNC Symbol;Acc:HGNC:12755]
811	ENSG00000065243	0.238964	6.75894	1.24866	0.21818	0.428218	-5.83137	NOT	PKN2	protein kinase N2 [Source:HGNC Symbol;Acc:HGNC:9406]
812	ENSG00000065268	-0.416301	4.2257	-2.34251	0.0235891	0.132908	-3.91609	NOT	WDR18	WD repeat domain 18 [Source:HGNC Symbol;Acc:HGNC:17956]
813	ENSG00000065308	0.0668561	0.804207	0.196099	0.845406	0.922677	-6.04969	NOT	TRAM2	translocation associated membrane protein 2 [Source:HGNC Symbol;Acc:HGNC:16855]
814	ENSG00000065320	0.388436	0.78214	1.55105	0.127823	0.316684	-4.9289	NOT	NTN1	netrin 1 [Source:HGNC Symbol;Acc:HGNC:8029]
815	ENSG00000065325	0.9926	-2.06111	2.56909	0.0135456	0.103786	-2.96104	NOT	GLP2R	glucagon like peptide 2 receptor [Source:HGNC Symbol;Acc:HGNC:4325]
816	ENSG00000065328	-0.702243	-0.855705	-2.25857	0.0287525	0.146471	-3.62631	NOT	MCM10	minichromosome maintenance 10 replication initiation factor [Source:HGNC Symbol;Acc:HGNC:18043]
817	ENSG00000065357	-0.455964	8.12212	-2.20616	0.0324658	0.155371	-4.27317	NOT	DGKA	diacylglycerol kinase alpha [Source:HGNC Symbol;Acc:HGNC:2849]
818	ENSG00000065361	-0.647414	-2.07256	-2.00726	0.0506871	0.192841	-4.03124	NOT	ERBB3	erb-b2 receptor tyrosine kinase 3 [Source:HGNC Symbol;Acc:HGNC:3431]
819	ENSG00000065413	-0.0724196	8.20928	-0.358734	0.721455	0.849769	-6.52518	NOT	ANKRD44	ankyrin repeat domain 44 [Source:HGNC Symbol;Acc:HGNC:25259]
820	ENSG00000065427	-0.394914	6.62474	-3.00257	0.00433919	0.0650156	-2.48008	NOT	KARS1	lysyl-tRNA synthetase 1 [Source:HGNC Symbol;Acc:HGNC:6215]
821	ENSG00000065457	0.21127	2.96257	1.01423	0.315838	0.529985	-5.84295	NOT	ADAT1	adenosine deaminase tRNA specific 1 [Source:HGNC Symbol;Acc:HGNC:228]
822	ENSG00000065485	-0.461162	2.62958	-3.0557	0.00374991	0.0613789	-2.12348	NOT	PDIA5	protein disulfide isomerase family A member 5 [Source:HGNC Symbol;Acc:HGNC:24811]
823	ENSG00000065491	0.10692	4.52205	0.935788	0.354326	0.567546	-6.0931	NOT	TBC1D22B	TBC1 domain family member 22B [Source:HGNC Symbol;Acc:HGNC:21602]
824	ENSG00000065518	-0.134176	6.06617	-1.23273	0.22401	0.434638	-5.84634	NOT	NDUFB4	NADH:ubiquinone oxidoreductase subunit B4 [Source:HGNC Symbol;Acc:HGNC:7699]
825	ENSG00000065526	-0.133541	7.44164	-1.09661	0.278587	0.492945	-6.00165	NOT	SPEN	spen family transcriptional repressor [Source:HGNC Symbol;Acc:HGNC:17575]
826	ENSG00000065534	0.124477	2.42045	0.451851	0.653524	0.805133	-6.17473	NOT	MYLK	myosin light chain kinase [Source:HGNC Symbol;Acc:HGNC:7590]
827	ENSG00000065548	0.214215	6.37561	1.50867	0.138302	0.330763	-5.48546	NOT	ZC3H15	zinc finger CCCH-type containing 15 [Source:HGNC Symbol;Acc:HGNC:29528]
828	ENSG00000065559	0.556079	5.54879	3.04447	0.00386787	0.062325	-2.36088	NOT	MAP2K4	mitogen-activated protein kinase kinase 4 [Source:HGNC Symbol;Acc:HGNC:6844]
829	ENSG00000065600	-0.188758	3.91583	-1.73505	0.0895066	0.260792	-5.01596	NOT	PACC1	proton activated chloride channel 1 [Source:HGNC Symbol;Acc:HGNC:25593]
830	ENSG00000065609	0.0773247	-3.5378	0.203343	0.839774	0.919835	-5.73666	NOT	SNAP91	synaptosome associated protein 91 [Source:HGNC Symbol;Acc:HGNC:14986]
831	ENSG00000065613	0.181995	6.05814	1.42829	0.160041	0.358411	-5.5953	NOT	SLK	STE20 like kinase [Source:HGNC Symbol;Acc:HGNC:11088]
832	ENSG00000065615	0.529003	6.57134	2.94553	0.00506773	0.0687617	-2.62253	NOT	CYB5R4	cytochrome b5 reductase 4 [Source:HGNC Symbol;Acc:HGNC:20147]
833	ENSG00000065618	0.88863	-0.0822426	1.64612	0.106634	0.285488	-4.70728	NOT	COL17A1	collagen type XVII alpha 1 chain [Source:HGNC Symbol;Acc:HGNC:2194]
834	ENSG00000065621	0.976238	2.40389	2.82434	0.00701035	0.0792539	-2.64797	NOT	GSTO2	glutathione S-transferase omega 2 [Source:HGNC Symbol;Acc:HGNC:23064]
835	ENSG00000065665	0.311818	4.30202	1.74005	0.0886152	0.259399	-5.04135	NOT	SEC61A2	SEC61 translocon subunit alpha 2 [Source:HGNC Symbol;Acc:HGNC:17702]
836	ENSG00000065675	-0.0619259	6.70838	-0.485802	0.629441	0.789592	-6.48199	NOT	PRKCQ	protein kinase C theta [Source:HGNC Symbol;Acc:HGNC:9410]
837	ENSG00000065717	-0.296429	3.61087	-1.26675	0.211696	0.420712	-5.64948	NOT	TLE2	TLE family member 2, transcriptional corepressor [Source:HGNC Symbol;Acc:HGNC:11838]
838	ENSG00000065802	-0.452699	5.00383	-2.36522	0.0223429	0.1302	-3.92027	NOT	ASB1	ankyrin repeat and SOCS box containing 1 [Source:HGNC Symbol;Acc:HGNC:16011]
839	ENSG00000065809	0.283445	7.87899	1.82415	0.0747053	0.236519	-4.98383	NOT	FAM107B	family with sequence similarity 107 member B [Source:HGNC Symbol;Acc:HGNC:23726]
840	ENSG00000065833	0.165125	1.64761	0.773247	0.443378	0.645993	-5.88126	NOT	ME1	malic enzyme 1 [Source:HGNC Symbol;Acc:HGNC:6983]
841	ENSG00000065882	0.00708922	6.99555	0.0595044	0.952811	0.978047	-6.59785	NOT	TBC1D1	TBC1 domain family member 1 [Source:HGNC Symbol;Acc:HGNC:11578]
842	ENSG00000065883	-0.139074	6.82279	-1.11781	0.269518	0.483717	-5.98159	NOT	CDK13	cyclin dependent kinase 13 [Source:HGNC Symbol;Acc:HGNC:1733]
843	ENSG00000065911	-0.101993	3.80625	-0.560893	0.577624	0.749999	-6.30025	NOT	MTHFD2	methylenetetrahydrofolate dehydrogenase (NADP+ dependent) 2, methenyltetrahydrofolate cyclohydrolase [Source:HGNC Symbol;Acc:HGNC:7434]
844	ENSG00000065923	0.362893	4.74821	2.49938	0.0161165	0.111956	-3.61623	NOT	SLC9A7	solute carrier family 9 member A7 [Source:HGNC Symbol;Acc:HGNC:17123]
845	ENSG00000065970	0.0105883	5.37821	0.110851	0.912222	0.959352	-6.57255	NOT	FOXJ2	forkhead box J2 [Source:HGNC Symbol;Acc:HGNC:24818]
846	ENSG00000065978	-0.435075	9.20321	-2.57358	0.0133936	0.103214	-3.47975	NOT	YBX1	Y-box binding protein 1 [Source:HGNC Symbol;Acc:HGNC:8014]
847	ENSG00000065989	0.0711436	5.29638	0.483925	0.630761	0.790435	-6.45823	NOT	PDE4A	phosphodiesterase 4A [Source:HGNC Symbol;Acc:HGNC:8780]
848	ENSG00000066027	-0.0126837	6.92205	-0.124723	0.901293	0.953422	-6.59205	NOT	PPP2R5A	protein phosphatase 2 regulatory subunit B'alpha [Source:HGNC Symbol;Acc:HGNC:9309]
849	ENSG00000066032	-0.354216	-0.288301	-0.675441	0.502816	0.694208	-5.73671	NOT	CTNNA2	catenin alpha 2 [Source:HGNC Symbol;Acc:HGNC:2510]
850	ENSG00000066044	-0.324642	5.63671	-3.14321	0.00294023	0.0566469	-2.11214	NOT	ELAVL1	ELAV like RNA binding protein 1 [Source:HGNC Symbol;Acc:HGNC:3312]
851	ENSG00000066056	-0.0301834	-0.266252	-0.142792	0.887086	0.946514	-5.94389	NOT	TIE1	tyrosine kinase with immunoglobulin like and EGF like domains 1 [Source:HGNC Symbol;Acc:HGNC:11809]
852	ENSG00000066084	0.180591	6.32266	1.35229	0.182971	0.386899	-5.69971	NOT	DIP2B	disco interacting protein 2 homolog B [Source:HGNC Symbol;Acc:HGNC:29284]
853	ENSG00000066117	-0.305558	5.82536	-2.96146	0.00485355	0.0676248	-2.576	NOT	SMARCD1	SWI/SNF related, matrix associated, actin dependent regulator of chromatin, subfamily d, member 1 [Source:HGNC Symbol;Acc:HGNC:11106]
854	ENSG00000066136	-0.12815	6.25023	-1.16732	0.249165	0.46203	-5.92468	NOT	NFYC	nuclear transcription factor Y subunit gamma [Source:HGNC Symbol;Acc:HGNC:7806]
855	ENSG00000066185	-0.391602	-1.48129	-1.51766	0.136023	0.327781	-4.80804	NOT	ZMYND12	zinc finger MYND-type containing 12 [Source:HGNC Symbol;Acc:HGNC:21192]
856	ENSG00000066230	0.215068	-2.6357	0.507803	0.614046	0.778054	-5.67695	NOT	SLC9A3	solute carrier family 9 member A3 [Source:HGNC Symbol;Acc:HGNC:11073]
857	ENSG00000066248	0.0820517	-1.86744	0.255437	0.799538	0.897509	-5.80741	NOT	NGEF	neuronal guanine nucleotide exchange factor [Source:HGNC Symbol;Acc:HGNC:7807]
858	ENSG00000066279	-0.287035	0.324909	-1.03971	0.30397	0.518169	-5.5032	NOT	ASPM	abnormal spindle microtubule assembly [Source:HGNC Symbol;Acc:HGNC:19048]
859	ENSG00000066294	0.563083	-2.30008	1.11946	0.268821	0.483216	-5.23647	NOT	CD84	CD84 molecule [Source:HGNC Symbol;Acc:HGNC:1704]
860	ENSG00000066322	-0.3733	5.7536	-2.16437	0.0357235	0.162075	-4.35556	NOT	ELOVL1	ELOVL fatty acid elongase 1 [Source:HGNC Symbol;Acc:HGNC:14418]
861	ENSG00000066336	0.0989598	10.0378	0.447057	0.656956	0.807153	-6.46106	NOT	SPI1	Spi-1 proto-oncogene [Source:HGNC Symbol;Acc:HGNC:11241]
862	ENSG00000066379	0.124497	3.2147	0.698579	0.488373	0.682911	-6.14006	NOT	ZNRD1	zinc ribbon domain containing 1 [Source:HGNC Symbol;Acc:HGNC:13182]
863	ENSG00000066382	0.129289	-0.695314	0.370267	0.712903	0.844689	-5.84829	NOT	MPPED2	metallophosphoesterase domain containing 2 [Source:HGNC Symbol;Acc:HGNC:1180]
864	ENSG00000066405	-0.0265149	-1.72957	-0.0647804	0.948633	0.975804	-5.84463	NOT	CLDN18	claudin 18 [Source:HGNC Symbol;Acc:HGNC:2039]
865	ENSG00000066422	0.167387	6.00922	1.05428	0.297325	0.512236	-6.04451	NOT	ZBTB11	zinc finger and BTB domain containing 11 [Source:HGNC Symbol;Acc:HGNC:16740]
866	ENSG00000066427	-0.0809714	5.73105	-1.05542	0.296808	0.511685	-6.03792	NOT	ATXN3	ataxin 3 [Source:HGNC Symbol;Acc:HGNC:7106]
867	ENSG00000066455	0.0382285	4.46775	0.409251	0.684277	0.826145	-6.439	NOT	GOLGA5	golgin A5 [Source:HGNC Symbol;Acc:HGNC:4428]
868	ENSG00000066468	0.148513	1.19576	0.462263	0.646097	0.800501	-6.01171	NOT	FGFR2	fibroblast growth factor receptor 2 [Source:HGNC Symbol;Acc:HGNC:3689]
869	ENSG00000066557	0.334655	3.4002	1.23598	0.222814	0.433088	-5.65572	NOT	LRRC40	leucine rich repeat containing 40 [Source:HGNC Symbol;Acc:HGNC:26004]
870	ENSG00000066583	-0.244116	2.84238	-1.77988	0.0817794	0.247911	-4.82057	NOT	ISOC1	isochorismatase domain containing 1 [Source:HGNC Symbol;Acc:HGNC:24254]
871	ENSG00000066629	0.666637	-2.96199	1.38765	0.172008	0.373799	-4.90674	NOT	EML1	EMAP like 1 [Source:HGNC Symbol;Acc:HGNC:3330]
872	ENSG00000066651	-0.0513917	4.1332	-0.411499	0.68264	0.825157	-6.40733	NOT	TRMT11	tRNA methyltransferase 11 homolog [Source:HGNC Symbol;Acc:HGNC:21080]
873	ENSG00000066697	-0.2008	0.686904	-0.877385	0.38489	0.596741	-5.68877	NOT	MSANTD3	Myb/SANT DNA binding domain containing 3 [Source:HGNC Symbol;Acc:HGNC:23370]
874	ENSG00000066735	-0.85686	-1.42281	-2.21603	0.0317355	0.153416	-3.68254	NOT	KIF26A	kinesin family member 26A [Source:HGNC Symbol;Acc:HGNC:20226]
875	ENSG00000066739	0.0334753	5.95494	0.223756	0.82395	0.910801	-6.5693	NOT	ATG2B	autophagy related 2B [Source:HGNC Symbol;Acc:HGNC:20187]
876	ENSG00000066777	0.293622	6.65636	1.96646	0.0553666	0.201879	-4.73959	NOT	ARFGEF1	ADP ribosylation factor guanine nucleotide exchange factor 1 [Source:HGNC Symbol;Acc:HGNC:15772]
877	ENSG00000066827	0.0762488	3.90704	0.552649	0.58321	0.754058	-6.31451	NOT	ZFAT	zinc finger and AT-hook domain containing [Source:HGNC Symbol;Acc:HGNC:19899]
878	ENSG00000066855	-0.0114067	3.60132	-0.0983494	0.922087	0.964161	-6.42651	NOT	MTFR1	mitochondrial fission regulator 1 [Source:HGNC Symbol;Acc:HGNC:29510]
879	ENSG00000066923	0.25766	1.7601	1.25844	0.214654	0.423908	-5.42333	NOT	STAG3	stromal antigen 3 [Source:HGNC Symbol;Acc:HGNC:11356]
880	ENSG00000066926	-0.136269	4.12718	-0.448362	0.656021	0.806402	-6.39151	NOT	FECH	ferrochelatase [Source:HGNC Symbol;Acc:HGNC:3647]
881	ENSG00000066933	0.0993877	4.08002	0.491498	0.625438	0.786477	-6.36488	NOT	MYO9A	myosin IXA [Source:HGNC Symbol;Acc:HGNC:7608]
882	ENSG00000067048	1.24145	4.25992	0.846326	0.401803	0.61096	-6.12805	NOT	DDX3Y	DEAD-box helicase 3 Y-linked [Source:HGNC Symbol;Acc:HGNC:2699]
883	ENSG00000067057	-0.151225	5.9549	-1.02892	0.308961	0.522937	-6.0694	NOT	PFKP	phosphofructokinase, platelet [Source:HGNC Symbol;Acc:HGNC:8878]
884	ENSG00000067064	0.550701	4.26152	2.16385	0.0357664	0.162112	-4.2743	NOT	IDI1	isopentenyl-diphosphate delta isomerase 1 [Source:HGNC Symbol;Acc:HGNC:5387]
885	ENSG00000067066	0.142136	7.55828	1.29271	0.202642	0.410519	-5.77337	NOT	SP100	SP100 nuclear antigen [Source:HGNC Symbol;Acc:HGNC:11206]
886	ENSG00000067082	0.603485	9.28162	2.89865	0.00575052	0.0722393	-2.71729	NOT	KLF6	Kruppel like factor 6 [Source:HGNC Symbol;Acc:HGNC:2235]
887	ENSG00000067113	0.0467557	3.60819	0.279715	0.780965	0.885874	-6.39277	NOT	PLPP1	phospholipid phosphatase 1 [Source:HGNC Symbol;Acc:HGNC:9228]
888	ENSG00000067141	-0.305173	2.89723	-1.46543	0.149685	0.346242	-5.30434	NOT	NEO1	neogenin 1 [Source:HGNC Symbol;Acc:HGNC:7754]
889	ENSG00000067167	-0.10213	7.08705	-0.743212	0.461176	0.660845	-6.3237	NOT	TRAM1	translocation associated membrane protein 1 [Source:HGNC Symbol;Acc:HGNC:20568]
890	ENSG00000067177	0.0923974	-1.80221	0.331972	0.741436	0.8631	-5.79011	NOT	PHKA1	phosphorylase kinase regulatory subunit alpha 1 [Source:HGNC Symbol;Acc:HGNC:8925]
891	ENSG00000067182	-0.0120356	6.62375	-0.0666156	0.94718	0.975132	-6.59785	NOT	TNFRSF1A	TNF receptor superfamily member 1A [Source:HGNC Symbol;Acc:HGNC:11916]
892	ENSG00000067191	-0.306067	3.20161	-1.69141	0.097602	0.273127	-5.00654	NOT	CACNB1	calcium voltage-gated channel auxiliary subunit beta 1 [Source:HGNC Symbol;Acc:HGNC:1401]
893	ENSG00000067208	0.147112	4.72838	0.709892	0.481396	0.677452	-6.29175	NOT	EVI5	ecotropic viral integration site 5 [Source:HGNC Symbol;Acc:HGNC:3501]
894	ENSG00000067221	-0.447925	2.21206	-2.21243	0.0319999	0.15421	-3.96775	NOT	STOML1	stomatin like 1 [Source:HGNC Symbol;Acc:HGNC:14560]
895	ENSG00000067225	-0.336354	9.06541	-2.03062	0.0481657	0.188675	-4.60035	NOT	PKM	pyruvate kinase M1/2 [Source:HGNC Symbol;Acc:HGNC:9021]
896	ENSG00000067248	0.371192	1.66697	1.19	0.240221	0.452559	-5.49048	NOT	DHX29	DExH-box helicase 29 [Source:HGNC Symbol;Acc:HGNC:15815]
897	ENSG00000067334	0.242238	5.84211	1.64688	0.106478	0.285253	-5.27139	NOT	DNTTIP2	deoxynucleotidyltransferase terminal interacting protein 2 [Source:HGNC Symbol;Acc:HGNC:24013]
898	ENSG00000067365	0.0808931	4.68061	0.88676	0.379874	0.591638	-6.14936	NOT	METTL22	methyltransferase like 22 [Source:HGNC Symbol;Acc:HGNC:28368]
12297	ENSG00000183876	4.08185	0.00332386	4.8063	1.71e-05	0.00486751	2.82362	UP	ARSI	arylsulfatase family member I [Source:HGNC Symbol;Acc:HGNC:32521]
900	ENSG00000067445	-0.375111	-0.00134062	-1.65614	0.104579	0.282665	-4.70969	NOT	TRO	trophinin [Source:HGNC Symbol;Acc:HGNC:12326]
901	ENSG00000067533	-0.139379	3.3355	-1.03692	0.305256	0.519719	-5.87136	NOT	RRP15	ribosomal RNA processing 15 homolog [Source:HGNC Symbol;Acc:HGNC:24255]
902	ENSG00000067560	-0.181879	9.27232	-1.87688	0.0669598	0.222648	-4.87488	NOT	RHOA	ras homolog family member A [Source:HGNC Symbol;Acc:HGNC:667]
903	ENSG00000067596	0.0261682	6.20107	0.242814	0.809241	0.902826	-6.56822	NOT	DHX8	DEAH-box helicase 8 [Source:HGNC Symbol;Acc:HGNC:2749]
904	ENSG00000067601	-0.0659935	1.56207	-0.402615	0.689118	0.829188	-6.08412	NOT	PMS2P4	PMS1 homolog 2, mismatch repair system component pseudogene 4 [Source:HGNC Symbol;Acc:HGNC:9129]
905	ENSG00000067606	0.0642402	4.72591	0.367171	0.715195	0.845761	-6.47553	NOT	PRKCZ	protein kinase C zeta [Source:HGNC Symbol;Acc:HGNC:9412]
906	ENSG00000067646	0.853995	0.582708	1.12113	0.268119	0.482624	-5.43543	NOT	ZFY	zinc finger protein Y-linked [Source:HGNC Symbol;Acc:HGNC:12870]
907	ENSG00000067704	-0.438159	5.49085	-2.5993	0.0125526	0.100469	-3.42787	NOT	IARS2	isoleucyl-tRNA synthetase 2, mitochondrial [Source:HGNC Symbol;Acc:HGNC:29685]
908	ENSG00000067715	0.456025	-1.55389	0.919932	0.362463	0.575317	-5.46002	NOT	SYT1	synaptotagmin 1 [Source:HGNC Symbol;Acc:HGNC:11509]
909	ENSG00000067798	0.0532846	-0.628861	0.0953191	0.92448	0.964849	-5.9144	NOT	NAV3	neuron navigator 3 [Source:HGNC Symbol;Acc:HGNC:15998]
910	ENSG00000067829	-0.31815	6.46803	-2.60731	0.0123006	0.0999189	-3.42472	NOT	IDH3G	isocitrate dehydrogenase (NAD(+)) 3 non-catalytic subunit gamma [Source:HGNC Symbol;Acc:HGNC:5386]
911	ENSG00000067836	-0.280781	3.36258	-1.2029	0.235241	0.446637	-5.69586	NOT	ROGDI	rogdi atypical leucine zipper [Source:HGNC Symbol;Acc:HGNC:29478]
912	ENSG00000067840	-0.808478	5.39835	-1.8055	0.0776186	0.240979	-4.99867	NOT	PDZD4	PDZ domain containing 4 [Source:HGNC Symbol;Acc:HGNC:21167]
913	ENSG00000067900	0.323293	7.39954	1.83675	0.0727881	0.233233	-4.96614	NOT	ROCK1	Rho associated coiled-coil containing protein kinase 1 [Source:HGNC Symbol;Acc:HGNC:10251]
914	ENSG00000067955	-0.0821998	5.98189	-0.761314	0.4504	0.652548	-6.30591	NOT	CBFB	core-binding factor subunit beta [Source:HGNC Symbol;Acc:HGNC:1539]
915	ENSG00000067992	0.568408	6.32502	3.8655	0.00034999	0.0238107	-0.134919	NOT	PDK3	pyruvate dehydrogenase kinase 3 [Source:HGNC Symbol;Acc:HGNC:8811]
916	ENSG00000068001	-0.308735	1.98321	-1.26756	0.211408	0.420577	-5.44577	NOT	HYAL2	hyaluronidase 2 [Source:HGNC Symbol;Acc:HGNC:5321]
917	ENSG00000068024	-0.0392738	6.84208	-0.306293	0.76078	0.874709	-6.55297	NOT	HDAC4	histone deacetylase 4 [Source:HGNC Symbol;Acc:HGNC:14063]
918	ENSG00000068028	-0.487191	7.46426	-2.54183	0.0145028	0.107028	-3.5694	NOT	RASSF1	Ras association domain family member 1 [Source:HGNC Symbol;Acc:HGNC:9882]
919	ENSG00000068078	-0.131047	-3.1016	-0.357562	0.722325	0.850081	-5.71658	NOT	FGFR3	fibroblast growth factor receptor 3 [Source:HGNC Symbol;Acc:HGNC:3690]
920	ENSG00000068079	-0.53895	5.17387	-1.85083	0.0706967	0.229118	-4.91462	NOT	IFI35	interferon induced protein 35 [Source:HGNC Symbol;Acc:HGNC:5399]
921	ENSG00000068097	-0.0657281	3.73398	-0.443833	0.659268	0.808651	-6.35007	NOT	HEATR6	HEAT repeat containing 6 [Source:HGNC Symbol;Acc:HGNC:24076]
922	ENSG00000068120	-0.425354	5.65005	-2.2445	0.0297104	0.148735	-4.19326	NOT	COASY	Coenzyme A synthase [Source:HGNC Symbol;Acc:HGNC:29932]
923	ENSG00000068137	0.00546247	0.161689	0.0190703	0.984868	0.992701	-5.99622	NOT	PLEKHH3	pleckstrin homology, MyTH4 and FERM domain containing H3 [Source:HGNC Symbol;Acc:HGNC:26105]
924	ENSG00000068305	0.274307	6.73225	1.39713	0.169156	0.369865	-5.64175	NOT	MEF2A	myocyte enhancer factor 2A [Source:HGNC Symbol;Acc:HGNC:6993]
925	ENSG00000068308	0.149877	7.61348	1.30233	0.199362	0.406645	-5.76087	NOT	OTUD5	OTU deubiquitinase 5 [Source:HGNC Symbol;Acc:HGNC:25402]
926	ENSG00000068323	0.217038	6.99563	1.26587	0.212006	0.420945	-5.80992	NOT	TFE3	transcription factor binding to IGHM enhancer 3 [Source:HGNC Symbol;Acc:HGNC:11752]
927	ENSG00000068354	-0.0945405	5.10021	-0.686378	0.49596	0.689057	-6.33151	NOT	TBC1D25	TBC1 domain family member 25 [Source:HGNC Symbol;Acc:HGNC:8092]
928	ENSG00000068366	0.220302	6.28002	1.50507	0.139221	0.332136	-5.48994	NOT	ACSL4	acyl-CoA synthetase long chain family member 4 [Source:HGNC Symbol;Acc:HGNC:3571]
929	ENSG00000068383	0.847363	6.297	4.31655	8.47e-05	0.0121893	1.20958	NOT	INPP5A	inositol polyphosphate-5-phosphatase A [Source:HGNC Symbol;Acc:HGNC:6076]
930	ENSG00000068394	-0.113051	4.16031	-0.827585	0.412228	0.619673	-6.15526	NOT	GPKOW	G-patch domain and KOW motifs [Source:HGNC Symbol;Acc:HGNC:30677]
931	ENSG00000068400	-0.168734	7.11268	-1.33388	0.188887	0.394171	-5.72359	NOT	GRIPAP1	GRIP1 associated protein 1 [Source:HGNC Symbol;Acc:HGNC:18706]
932	ENSG00000068438	-0.11672	5.41996	-0.801161	0.427205	0.631666	-6.26076	NOT	FTSJ1	FtsJ RNA 2'-O-methyltransferase 1 [Source:HGNC Symbol;Acc:HGNC:13254]
933	ENSG00000068489	-0.257542	0.420963	-0.805636	0.424645	0.629841	-5.71698	NOT	PRR11	proline rich 11 [Source:HGNC Symbol;Acc:HGNC:25619]
934	ENSG00000068615	0.0164711	-1.9305	0.0382249	0.969676	0.985652	-5.83411	NOT	REEP1	receptor accessory protein 1 [Source:HGNC Symbol;Acc:HGNC:25786]
935	ENSG00000068650	-0.133295	7.08929	-0.68336	0.497847	0.690567	-6.366	NOT	ATP11A	ATPase phospholipid transporting 11A [Source:HGNC Symbol;Acc:HGNC:13552]
936	ENSG00000068654	-0.374605	4.75107	-2.88547	0.00595736	0.0736542	-2.72413	NOT	POLR1A	RNA polymerase I subunit A [Source:HGNC Symbol;Acc:HGNC:17264]
937	ENSG00000068697	0.149274	7.04282	1.47652	0.146696	0.3419	-5.53165	NOT	LAPTM4A	lysosomal protein transmembrane 4 alpha [Source:HGNC Symbol;Acc:HGNC:6924]
938	ENSG00000068724	-0.294857	6.10743	-1.74335	0.0880311	0.258317	-5.1212	NOT	TTC7A	tetratricopeptide repeat domain 7A [Source:HGNC Symbol;Acc:HGNC:19750]
939	ENSG00000068745	0.0285151	6.12573	0.259149	0.79669	0.895428	-6.56325	NOT	IP6K2	inositol hexakisphosphate kinase 2 [Source:HGNC Symbol;Acc:HGNC:17313]
940	ENSG00000068781	-0.532658	-1.03021	-1.87269	0.0675489	0.22376	-4.30106	NOT	STON1-GTF2A1L	STON1-GTF2A1L readthrough [Source:HGNC Symbol;Acc:HGNC:30651]
941	ENSG00000068784	0.272157	4.373	1.67222	0.101348	0.278092	-5.15617	NOT	SRBD1	S1 RNA binding domain 1 [Source:HGNC Symbol;Acc:HGNC:25521]
942	ENSG00000068796	0.207026	4.62147	1.11098	0.272416	0.486639	-5.92495	NOT	KIF2A	kinesin family member 2A [Source:HGNC Symbol;Acc:HGNC:6318]
943	ENSG00000068831	-0.562768	9.17515	-2.56634	0.0136394	0.104029	-3.49611	NOT	RASGRP2	RAS guanyl releasing protein 2 [Source:HGNC Symbol;Acc:HGNC:9879]
944	ENSG00000068878	0.497932	7.04739	2.92629	0.0053383	0.0699763	-2.66986	NOT	PSME4	proteasome activator subunit 4 [Source:HGNC Symbol;Acc:HGNC:20635]
945	ENSG00000068903	0.00712004	6.6931	0.0508421	0.959674	0.981316	-6.59886	NOT	SIRT2	sirtuin 2 [Source:HGNC Symbol;Acc:HGNC:10886]
946	ENSG00000068971	0.0881083	5.11272	0.598637	0.552386	0.731988	-6.38782	NOT	PPP2R5B	protein phosphatase 2 regulatory subunit B'beta [Source:HGNC Symbol;Acc:HGNC:9310]
947	ENSG00000068976	0.373508	3.90462	1.36908	0.1777	0.380415	-5.54681	NOT	PYGM	glycogen phosphorylase, muscle associated [Source:HGNC Symbol;Acc:HGNC:9726]
948	ENSG00000069018	0.770832	-3.31247	2.02684	0.0485658	0.189363	-3.95519	NOT	TRPC7	transient receptor potential cation channel subfamily C member 7 [Source:HGNC Symbol;Acc:HGNC:20754]
949	ENSG00000069020	0.0431757	4.04611	0.275917	0.783862	0.887848	-6.44393	NOT	MAST4	microtubule associated serine/threonine kinase family member 4 [Source:HGNC Symbol;Acc:HGNC:19037]
950	ENSG00000069122	0.367599	-3.3157	1.05655	0.296298	0.511062	-5.25528	NOT	ADGRF5	adhesion G protein-coupled receptor F5 [Source:HGNC Symbol;Acc:HGNC:19030]
951	ENSG00000069188	-0.182228	2.79251	-0.676169	0.502358	0.693964	-6.10356	NOT	SDK2	sidekick cell adhesion molecule 2 [Source:HGNC Symbol;Acc:HGNC:19308]
952	ENSG00000069248	0.19394	5.39093	1.53637	0.131377	0.321758	-5.42573	NOT	NUP133	nucleoporin 133 [Source:HGNC Symbol;Acc:HGNC:18016]
953	ENSG00000069275	-0.0348862	6.74689	-0.263612	0.79327	0.893515	-6.56527	NOT	NUCKS1	nuclear casein kinase and cyclin dependent kinase substrate 1 [Source:HGNC Symbol;Acc:HGNC:29923]
954	ENSG00000069329	-0.108893	5.85028	-0.835181	0.407983	0.616322	-6.24521	NOT	VPS35	VPS35 retromer complex component [Source:HGNC Symbol;Acc:HGNC:13487]
955	ENSG00000069345	0.210221	6.34842	1.92387	0.0606433	0.211735	-4.8151	NOT	DNAJA2	DnaJ heat shock protein family (Hsp40) member A2 [Source:HGNC Symbol;Acc:HGNC:14884]
956	ENSG00000069399	0.420905	7.89436	1.50076	0.140331	0.333518	-5.49142	NOT	BCL3	BCL3 transcription coactivator [Source:HGNC Symbol;Acc:HGNC:998]
957	ENSG00000069424	-0.151616	8.76187	-1.20636	0.23392	0.445358	-5.86425	NOT	KCNAB2	potassium voltage-gated channel subfamily A regulatory beta subunit 2 [Source:HGNC Symbol;Acc:HGNC:6229]
958	ENSG00000069493	-0.434825	7.31515	-2.07103	0.0440591	0.179775	-4.54279	NOT	CLEC2D	C-type lectin domain family 2 member D [Source:HGNC Symbol;Acc:HGNC:14351]
959	ENSG00000069509	-0.119763	1.60543	-0.742659	0.461508	0.661047	-5.90157	NOT	FUNDC1	FUN14 domain containing 1 [Source:HGNC Symbol;Acc:HGNC:28746]
960	ENSG00000069535	0.444178	-1.59325	1.24466	0.219632	0.430009	-5.13738	NOT	MAOB	monoamine oxidase B [Source:HGNC Symbol;Acc:HGNC:6834]
961	ENSG00000069667	0.541164	1.59647	1.34081	0.186644	0.391064	-5.29861	NOT	RORA	RAR related orphan receptor A [Source:HGNC Symbol;Acc:HGNC:10258]
962	ENSG00000069696	-0.0883117	1.3509	-0.423504	0.673924	0.819443	-6.04931	NOT	DRD4	dopamine receptor D4 [Source:HGNC Symbol;Acc:HGNC:3025]
963	ENSG00000069702	0.000986816	5.59045	0.00387955	0.996922	0.998761	-6.58591	NOT	TGFBR3	transforming growth factor beta receptor 3 [Source:HGNC Symbol;Acc:HGNC:11774]
964	ENSG00000069764	-0.135252	2.26199	-0.759166	0.451671	0.653461	-5.97471	NOT	PLA2G10	phospholipase A2 group X [Source:HGNC Symbol;Acc:HGNC:9029]
965	ENSG00000069849	-0.643311	6.41582	-1.49343	0.142231	0.335848	-5.50571	NOT	ATP1B3	ATPase Na+/K+ transporting subunit beta 3 [Source:HGNC Symbol;Acc:HGNC:806]
966	ENSG00000069869	0.0493281	2.63833	0.207665	0.836418	0.917739	-6.28408	NOT	NEDD4	NEDD4 E3 ubiquitin protein ligase [Source:HGNC Symbol;Acc:HGNC:7727]
967	ENSG00000069943	0.30068	4.39781	1.4941	0.142057	0.335617	-5.42542	NOT	PIGB	phosphatidylinositol glycan anchor biosynthesis class B [Source:HGNC Symbol;Acc:HGNC:8959]
12342	ENSG00000184260	4.05372	1.41829	4.09362	0.000172026	0.0164576	0.776586	UP	H2AC20	H2A clustered histone 20 [Source:HGNC Symbol;Acc:HGNC:4738]
969	ENSG00000069966	0.381431	4.06979	2.16465	0.0357012	0.162075	-4.25725	NOT	GNB5	G protein subunit beta 5 [Source:HGNC Symbol;Acc:HGNC:4401]
970	ENSG00000069974	-0.118968	6.65796	-0.691138	0.492992	0.686776	-6.36159	NOT	RAB27A	RAB27A, member RAS oncogene family [Source:HGNC Symbol;Acc:HGNC:9766]
971	ENSG00000069998	-0.462253	5.05301	-2.91226	0.00554393	0.0712554	-2.67365	NOT	HDHD5	haloacid dehalogenase like hydrolase domain containing 5 [Source:HGNC Symbol;Acc:HGNC:1843]
972	ENSG00000070010	0.048174	6.46306	0.387162	0.700442	0.837153	-6.52459	NOT	UFD1	ubiquitin recognition factor in ER associated degradation 1 [Source:HGNC Symbol;Acc:HGNC:12520]
973	ENSG00000070018	0.824041	-1.09553	2.23786	0.0301718	0.149789	-3.64772	NOT	LRP6	LDL receptor related protein 6 [Source:HGNC Symbol;Acc:HGNC:6698]
974	ENSG00000070019	-0.329538	2.17431	-1.24681	0.218852	0.429171	-5.49463	NOT	GUCY2C	guanylate cyclase 2C [Source:HGNC Symbol;Acc:HGNC:4688]
975	ENSG00000070031	-0.657113	-0.225237	-2.41959	0.0195969	0.122157	-3.3426	NOT	SCT	secretin [Source:HGNC Symbol;Acc:HGNC:10607]
976	ENSG00000070047	-0.19614	6.36345	-1.91021	0.0624254	0.214702	-4.83915	NOT	PHRF1	PHD and ring finger domains 1 [Source:HGNC Symbol;Acc:HGNC:24351]
977	ENSG00000070061	-0.128316	5.85743	-1.03661	0.305398	0.519781	-6.05987	NOT	ELP1	elongator complex protein 1 [Source:HGNC Symbol;Acc:HGNC:5959]
978	ENSG00000070081	0.00700114	5.36734	0.0474946	0.962327	0.98238	-6.57717	NOT	NUCB2	nucleobindin 2 [Source:HGNC Symbol;Acc:HGNC:8044]
979	ENSG00000070087	-0.108453	0.407392	-0.453809	0.652125	0.804494	-5.92541	NOT	PFN2	profilin 2 [Source:HGNC Symbol;Acc:HGNC:8882]
980	ENSG00000070159	-0.0344831	-1.99671	-0.0821381	0.934897	0.970155	-5.82844	NOT	PTPN3	protein tyrosine phosphatase non-receptor type 3 [Source:HGNC Symbol;Acc:HGNC:9655]
981	ENSG00000070182	0.461942	3.26797	0.99784	0.323638	0.536943	-5.89552	NOT	SPTB	spectrin beta, erythrocytic [Source:HGNC Symbol;Acc:HGNC:11274]
982	ENSG00000070190	0.00817004	6.07341	0.0633405	0.949773	0.976348	-6.59422	NOT	DAPP1	dual adaptor of phosphotyrosine and 3-phosphoinositides 1 [Source:HGNC Symbol;Acc:HGNC:16500]
983	ENSG00000070214	-0.128142	4.78069	-0.959236	0.342513	0.555253	-6.09132	NOT	SLC44A1	solute carrier family 44 member 1 [Source:HGNC Symbol;Acc:HGNC:18798]
984	ENSG00000070269	-0.0457314	3.22196	-0.252639	0.801686	0.898801	-6.35226	NOT	TMEM260	transmembrane protein 260 [Source:HGNC Symbol;Acc:HGNC:20185]
985	ENSG00000070366	0.25692	5.60048	1.99315	0.0522651	0.19599	-4.67745	NOT	SMG6	SMG6 nonsense mediated mRNA decay factor [Source:HGNC Symbol;Acc:HGNC:17809]
986	ENSG00000070367	0.0380438	4.94623	0.264076	0.792915	0.893316	-6.52268	NOT	EXOC5	exocyst complex component 5 [Source:HGNC Symbol;Acc:HGNC:10696]
987	ENSG00000070371	-0.200769	3.08471	-0.667807	0.507632	0.698148	-6.14715	NOT	CLTCL1	clathrin heavy chain like 1 [Source:HGNC Symbol;Acc:HGNC:2093]
988	ENSG00000070388	-0.547308	-1.08367	-1.55175	0.127655	0.31661	-4.78395	NOT	FGF22	fibroblast growth factor 22 [Source:HGNC Symbol;Acc:HGNC:3679]
989	ENSG00000070404	-0.213623	3.08326	-0.964086	0.340102	0.553143	-5.91071	NOT	FSTL3	follistatin like 3 [Source:HGNC Symbol;Acc:HGNC:3973]
990	ENSG00000070413	-0.340268	6.61066	-2.58846	0.0129009	0.101949	-3.46772	NOT	DGCR2	DiGeorge syndrome critical region gene 2 [Source:HGNC Symbol;Acc:HGNC:2845]
991	ENSG00000070423	-0.491683	7.19946	-3.03106	0.00401325	0.0631934	-2.40726	NOT	RNF126	ring finger protein 126 [Source:HGNC Symbol;Acc:HGNC:21151]
992	ENSG00000070444	0.0246266	6.09257	0.175562	0.861418	0.931936	-6.58104	NOT	MNT	MAX network transcriptional repressor [Source:HGNC Symbol;Acc:HGNC:7188]
993	ENSG00000070476	-0.287868	7.13528	-2.16735	0.0354822	0.161455	-4.35792	NOT	ZXDC	ZXD family zinc finger C [Source:HGNC Symbol;Acc:HGNC:28160]
994	ENSG00000070495	0.760887	6.64689	2.78758	0.00772403	0.0818991	-3.00588	NOT	JMJD6	jumonji domain containing 6, arginine demethylase and lysine hydroxylase [Source:HGNC Symbol;Acc:HGNC:19355]
995	ENSG00000070501	0.825275	5.60402	3.51573	0.00100591	0.0384286	-1.11374	NOT	POLB	DNA polymerase beta [Source:HGNC Symbol;Acc:HGNC:9174]
996	ENSG00000070526	-0.271485	-0.337244	-0.915675	0.364668	0.577328	-5.553	NOT	ST6GALNAC1	ST6 N-acetylgalactosaminide alpha-2,6-sialyltransferase 1 [Source:HGNC Symbol;Acc:HGNC:23614]
997	ENSG00000070610	-0.258927	6.2468	-2.03119	0.048105	0.188508	-4.61814	NOT	GBA2	glucosylceramidase beta 2 [Source:HGNC Symbol;Acc:HGNC:18986]
998	ENSG00000070614	0.274489	5.74162	1.43372	0.158494	0.356952	-5.58175	NOT	NDST1	N-deacetylase and N-sulfotransferase 1 [Source:HGNC Symbol;Acc:HGNC:7680]
999	ENSG00000070718	-0.0783451	4.89606	-0.385398	0.701739	0.83793	-6.48052	NOT	AP3M2	adaptor related protein complex 3 subunit mu 2 [Source:HGNC Symbol;Acc:HGNC:570]
4694	ENSG00000124216	4.03411	0.401224	5.39459	2.38e-06	0.00164152	4.60324	UP	SNAI1	snail family transcriptional repressor 1 [Source:HGNC Symbol;Acc:HGNC:11128]
1001	ENSG00000070731	0.625335	2.70169	1.70291	0.0954116	0.269509	-4.91736	NOT	ST6GALNAC2	ST6 N-acetylgalactosaminide alpha-2,6-sialyltransferase 2 [Source:HGNC Symbol;Acc:HGNC:10867]
1002	ENSG00000070756	-0.233799	10.5697	-1.37462	0.175987	0.378573	-5.62268	NOT	PABPC1	poly(A) binding protein cytoplasmic 1 [Source:HGNC Symbol;Acc:HGNC:8554]
1003	ENSG00000070759	0.524289	4.59506	2.68745	0.0100233	0.0908036	-3.18025	NOT	TESK2	testis associated actin remodelling kinase 2 [Source:HGNC Symbol;Acc:HGNC:11732]
8227	ENSG00000154928	3.99068	3.32729	4.10999	0.000163384	0.0162771	0.767129	UP	EPHB1	EPH receptor B1 [Source:HGNC Symbol;Acc:HGNC:3392]
1005	ENSG00000070770	-0.176348	5.61928	-1.70848	0.0943665	0.268083	-5.16879	NOT	CSNK2A2	casein kinase 2 alpha 2 [Source:HGNC Symbol;Acc:HGNC:2459]
1006	ENSG00000070778	-0.897956	-2.08705	-2.47161	0.0172585	0.11503	-3.16413	NOT	PTPN21	protein tyrosine phosphatase non-receptor type 21 [Source:HGNC Symbol;Acc:HGNC:9651]
1007	ENSG00000070785	-0.217751	4.00797	-1.65666	0.104473	0.282586	-5.14989	NOT	EIF2B3	eukaryotic translation initiation factor 2B subunit gamma [Source:HGNC Symbol;Acc:HGNC:3259]
4663	ENSG00000124102	3.98781	1.4002	2.92898	0.0052996	0.0699763	-2.27963	UP	PI3	peptidase inhibitor 3 [Source:HGNC Symbol;Acc:HGNC:8947]
1009	ENSG00000070814	0.0133906	6.50954	0.127522	0.899089	0.952745	-6.59167	NOT	TCOF1	treacle ribosome biogenesis factor 1 [Source:HGNC Symbol;Acc:HGNC:11654]
1010	ENSG00000070831	0.196884	8.80742	2.45636	0.0179164	0.116609	-3.74496	NOT	CDC42	cell division cycle 42 [Source:HGNC Symbol;Acc:HGNC:1736]
1011	ENSG00000070882	-0.271051	5.52911	-1.76163	0.0848544	0.253073	-5.07943	NOT	OSBPL3	oxysterol binding protein like 3 [Source:HGNC Symbol;Acc:HGNC:16370]
1012	ENSG00000070915	-0.650688	-0.366051	-2.1303	0.0385901	0.16835	-3.89369	NOT	SLC12A3	solute carrier family 12 member 3 [Source:HGNC Symbol;Acc:HGNC:10912]
1013	ENSG00000070950	0.17789	3.72645	1.34574	0.185058	0.389086	-5.55986	NOT	RAD18	RAD18 E3 ubiquitin protein ligase [Source:HGNC Symbol;Acc:HGNC:18278]
12143	ENSG00000182885	3.98463	3.86897	4.6231	3.14e-05	0.00661248	2.28241	UP	ADGRG3	adhesion G protein-coupled receptor G3 [Source:HGNC Symbol;Acc:HGNC:13728]
1015	ENSG00000070985	-0.222147	-0.962605	-0.727562	0.470611	0.668495	-5.64721	NOT	TRPM5	transient receptor potential cation channel subfamily M member 5 [Source:HGNC Symbol;Acc:HGNC:14323]
1016	ENSG00000071051	0.206652	5.62698	1.03464	0.306307	0.52047	-6.05623	NOT	NCK2	NCK adaptor protein 2 [Source:HGNC Symbol;Acc:HGNC:7665]
1017	ENSG00000071054	-0.0141113	7.64332	-0.147573	0.883333	0.943864	-6.58457	NOT	MAP4K4	mitogen-activated protein kinase kinase kinase kinase 4 [Source:HGNC Symbol;Acc:HGNC:6866]
1018	ENSG00000071073	-0.244311	7.30362	-1.52953	0.133061	0.323892	-5.45378	NOT	MGAT4A	alpha-1,3-mannosyl-glycoprotein 4-beta-N-acetylglucosaminyltransferase A [Source:HGNC Symbol;Acc:HGNC:7047]
1019	ENSG00000071082	-0.289778	9.49584	-1.51429	0.136872	0.328759	-5.4496	NOT	RPL31	ribosomal protein L31 [Source:HGNC Symbol;Acc:HGNC:10334]
1020	ENSG00000071127	-0.317608	8.72115	-2.72518	0.00909165	0.0871864	-3.13857	NOT	WDR1	WD repeat domain 1 [Source:HGNC Symbol;Acc:HGNC:12754]
1021	ENSG00000071189	0.514528	5.39754	2.52851	0.0149923	0.109025	-3.5825	NOT	SNX13	sorting nexin 13 [Source:HGNC Symbol;Acc:HGNC:21335]
1022	ENSG00000071205	0.21973	4.11161	1.21061	0.2323	0.443184	-5.76705	NOT	ARHGAP10	Rho GTPase activating protein 10 [Source:HGNC Symbol;Acc:HGNC:26099]
1023	ENSG00000071242	0.120333	4.99147	0.808573	0.422971	0.628482	-6.2348	NOT	RPS6KA2	ribosomal protein S6 kinase A2 [Source:HGNC Symbol;Acc:HGNC:10431]
1024	ENSG00000071243	0.348586	5.03867	2.29474	0.0264156	0.140139	-4.0679	NOT	ING3	inhibitor of growth family member 3 [Source:HGNC Symbol;Acc:HGNC:14587]
1025	ENSG00000071246	-0.785736	3.45897	-2.46545	0.0175212	0.115712	-3.58226	NOT	VASH1	vasohibin 1 [Source:HGNC Symbol;Acc:HGNC:19964]
1026	ENSG00000071462	-0.288687	6.11985	-1.47411	0.147343	0.342599	-5.53193	NOT	BUD23	BUD23 rRNA methyltransferase and ribosome maturation factor [Source:HGNC Symbol;Acc:HGNC:16405]
1027	ENSG00000071537	0.101062	6.39237	0.747966	0.458331	0.658859	-6.32039	NOT	SEL1L	SEL1L adaptor subunit of ERAD E3 ubiquitin ligase [Source:HGNC Symbol;Acc:HGNC:10717]
1028	ENSG00000071539	-0.586144	-0.434943	-2.08688	0.0425344	0.17635	-3.96802	NOT	TRIP13	thyroid hormone receptor interactor 13 [Source:HGNC Symbol;Acc:HGNC:12307]
1029	ENSG00000071553	-0.0020438	7.28913	-0.0164313	0.986962	0.993627	-6.59803	NOT	ATP6AP1	ATPase H+ transporting accessory protein 1 [Source:HGNC Symbol;Acc:HGNC:868]
1030	ENSG00000071564	-0.671435	6.48838	-3.32525	0.00175343	0.047249	-1.64306	NOT	TCF3	transcription factor 3 [Source:HGNC Symbol;Acc:HGNC:11633]
1031	ENSG00000071575	-0.601407	5.80201	-3.30313	0.00186851	0.0485636	-1.69541	NOT	TRIB2	tribbles pseudokinase 2 [Source:HGNC Symbol;Acc:HGNC:30809]
1032	ENSG00000071626	-0.451166	7.63755	-2.74141	0.0087158	0.0855194	-3.11102	NOT	DAZAP1	DAZ associated protein 1 [Source:HGNC Symbol;Acc:HGNC:2683]
1033	ENSG00000071655	-0.632375	5.01538	-2.74455	0.00864472	0.085161	-3.07377	NOT	MBD3	methyl-CpG binding domain protein 3 [Source:HGNC Symbol;Acc:HGNC:6918]
1034	ENSG00000071794	-0.174323	3.00452	-1.19816	0.237063	0.448816	-5.65601	NOT	HLTF	helicase like transcription factor [Source:HGNC Symbol;Acc:HGNC:11099]
1035	ENSG00000071859	0.0636528	6.09007	0.34212	0.733837	0.857734	-6.53783	NOT	FAM50A	family with sequence similarity 50 member A [Source:HGNC Symbol;Acc:HGNC:18786]
1036	ENSG00000071889	-0.23221	5.01895	-1.48094	0.145518	0.340226	-5.48934	NOT	FAM3A	FAM3 metabolism regulating signaling molecule A [Source:HGNC Symbol;Acc:HGNC:13749]
1037	ENSG00000071894	-0.863826	6.86803	-3.89256	0.000321982	0.023167	-0.0559039	NOT	CPSF1	cleavage and polyadenylation specific factor 1 [Source:HGNC Symbol;Acc:HGNC:2324]
1038	ENSG00000071909	-0.0272967	-0.170385	-0.0579158	0.954069	0.978449	-5.95988	NOT	MYO3B	myosin IIIB [Source:HGNC Symbol;Acc:HGNC:15576]
1039	ENSG00000071967	-0.520043	4.12787	-2.304	0.025845	0.138782	-3.98716	NOT	CYBRD1	cytochrome b reductase 1 [Source:HGNC Symbol;Acc:HGNC:20797]
1040	ENSG00000071994	-0.301227	5.31656	-2.40518	0.0202933	0.124083	-3.84955	NOT	PDCD2	programmed cell death 2 [Source:HGNC Symbol;Acc:HGNC:8762]
1041	ENSG00000072042	0.232223	2.85266	0.850462	0.399524	0.609104	-5.97721	NOT	RDH11	retinol dehydrogenase 11 [Source:HGNC Symbol;Acc:HGNC:17964]
1042	ENSG00000072062	-0.197165	7.24062	-1.6853	0.0987816	0.274906	-5.21676	NOT	PRKACA	protein kinase cAMP-activated catalytic subunit alpha [Source:HGNC Symbol;Acc:HGNC:9380]
1043	ENSG00000072071	-0.282436	2.43306	-1.92286	0.0607743	0.212121	-4.52931	NOT	ADGRL1	adhesion G protein-coupled receptor L1 [Source:HGNC Symbol;Acc:HGNC:20973]
1044	ENSG00000072110	0.0143467	7.4426	0.0837955	0.933587	0.969568	-6.59362	NOT	ACTN1	actinin alpha 1 [Source:HGNC Symbol;Acc:HGNC:163]
1045	ENSG00000072121	-0.0960332	5.31787	-0.874615	0.386379	0.597861	-6.19616	NOT	ZFYVE26	zinc finger FYVE-type containing 26 [Source:HGNC Symbol;Acc:HGNC:20761]
1046	ENSG00000072133	-0.0866973	-2.397	-0.261571	0.794833	0.894394	-5.77839	NOT	RPS6KA6	ribosomal protein S6 kinase A6 [Source:HGNC Symbol;Acc:HGNC:10435]
1047	ENSG00000072134	0.468775	2.75573	2.41599	0.0197686	0.122346	-3.60436	NOT	EPN2	epsin 2 [Source:HGNC Symbol;Acc:HGNC:18639]
1048	ENSG00000072135	-0.638155	7.60468	-3.08443	0.00346341	0.0594605	-2.26936	NOT	PTPN18	protein tyrosine phosphatase non-receptor type 18 [Source:HGNC Symbol;Acc:HGNC:9649]
1049	ENSG00000072163	-0.638755	1.0383	-1.85634	0.0698919	0.227995	-4.49152	NOT	LIMS2	LIM zinc finger domain containing 2 [Source:HGNC Symbol;Acc:HGNC:16084]
1050	ENSG00000072195	-0.397654	2.4897	-1.24025	0.221246	0.431295	-5.54358	NOT	SPEG	striated muscle enriched protein kinase [Source:HGNC Symbol;Acc:HGNC:16901]
1051	ENSG00000072210	-0.57747	4.93087	-3.22772	0.00231704	0.051403	-1.86729	NOT	ALDH3A2	aldehyde dehydrogenase 3 family member A2 [Source:HGNC Symbol;Acc:HGNC:403]
1052	ENSG00000072274	0.613699	6.42506	2.79136	0.00764758	0.0817715	-2.99629	NOT	TFRC	transferrin receptor [Source:HGNC Symbol;Acc:HGNC:11763]
1053	ENSG00000072310	0.0303113	6.87016	0.228021	0.820652	0.909283	-6.57395	NOT	SREBF1	sterol regulatory element binding transcription factor 1 [Source:HGNC Symbol;Acc:HGNC:11289]
1054	ENSG00000072315	0.274507	0.764425	0.996021	0.324511	0.537789	-5.58637	NOT	TRPC5	transient receptor potential cation channel subfamily C member 5 [Source:HGNC Symbol;Acc:HGNC:12337]
1055	ENSG00000072364	0.659056	6.95511	3.50281	0.001045	0.0390724	-1.16266	NOT	AFF4	AF4/FMR2 family member 4 [Source:HGNC Symbol;Acc:HGNC:17869]
1056	ENSG00000072401	0.774051	6.0906	3.39994	0.00141256	0.0427445	-1.43955	NOT	UBE2D1	ubiquitin conjugating enzyme E2 D1 [Source:HGNC Symbol;Acc:HGNC:12474]
1057	ENSG00000072415	0.589753	2.72938	2.38358	0.0213793	0.127553	-3.66714	NOT	MPP5	membrane palmitoylated protein 5 [Source:HGNC Symbol;Acc:HGNC:18669]
1058	ENSG00000072422	0.263783	1.64466	0.977479	0.333504	0.546619	-5.70843	NOT	RHOBTB1	Rho related BTB domain containing 1 [Source:HGNC Symbol;Acc:HGNC:18738]
1059	ENSG00000072501	-0.294914	6.04563	-1.91475	0.0618279	0.213711	-4.82785	NOT	SMC1A	structural maintenance of chromosomes 1A [Source:HGNC Symbol;Acc:HGNC:11111]
1060	ENSG00000072506	-0.438915	4.72969	-2.37169	0.0219992	0.129361	-3.89166	NOT	HSD17B10	hydroxysteroid 17-beta dehydrogenase 10 [Source:HGNC Symbol;Acc:HGNC:4800]
1061	ENSG00000072518	-0.140808	6.90791	-1.18981	0.240298	0.452637	-5.90048	NOT	MARK2	microtubule affinity regulating kinase 2 [Source:HGNC Symbol;Acc:HGNC:3332]
1062	ENSG00000072571	0.357759	-1.10274	1.32426	0.192036	0.398017	-5.07114	NOT	HMMR	hyaluronan mediated motility receptor [Source:HGNC Symbol;Acc:HGNC:5012]
1063	ENSG00000072609	-0.178283	7.0025	-2.33502	0.0240133	0.133678	-4.01856	NOT	CHFR	checkpoint with forkhead and ring finger domains [Source:HGNC Symbol;Acc:HGNC:20455]
1064	ENSG00000072657	0.721434	-1.67637	1.9741	0.0544628	0.200209	-4.0975	NOT	TRHDE	thyrotropin releasing hormone degrading enzyme [Source:HGNC Symbol;Acc:HGNC:30748]
1065	ENSG00000072682	0.769734	3.39918	2.19722	0.0331393	0.156712	-4.11669	NOT	P4HA2	prolyl 4-hydroxylase subunit alpha 2 [Source:HGNC Symbol;Acc:HGNC:8547]
1066	ENSG00000072694	-0.306229	3.6122	-1.41922	0.162652	0.362139	-5.45355	NOT	FCGR2B	Fc fragment of IgG receptor IIb [Source:HGNC Symbol;Acc:HGNC:3618]
1067	ENSG00000072736	-0.112968	5.98194	-0.902174	0.371718	0.584024	-6.19015	NOT	NFATC3	nuclear factor of activated T cells 3 [Source:HGNC Symbol;Acc:HGNC:7777]
1068	ENSG00000072756	0.296417	3.59762	2.02694	0.048555	0.189363	-4.47133	NOT	TRNT1	tRNA nucleotidyl transferase 1 [Source:HGNC Symbol;Acc:HGNC:17341]
1069	ENSG00000072778	-0.356508	8.1838	-2.30005	0.0260867	0.1393	-4.0822	NOT	ACADVL	acyl-CoA dehydrogenase very long chain [Source:HGNC Symbol;Acc:HGNC:92]
1070	ENSG00000072786	0.210821	9.50219	1.89631	0.0642825	0.218248	-4.83787	NOT	STK10	serine/threonine kinase 10 [Source:HGNC Symbol;Acc:HGNC:11388]
1071	ENSG00000072803	0.308241	5.65405	2.2055	0.0325148	0.155462	-4.27196	NOT	FBXW11	F-box and WD repeat domain containing 11 [Source:HGNC Symbol;Acc:HGNC:13607]
1072	ENSG00000072818	-0.406273	8.33688	-2.04948	0.0462092	0.184285	-4.57443	NOT	ACAP1	ArfGAP with coiled-coil, ankyrin repeat and PH domains 1 [Source:HGNC Symbol;Acc:HGNC:16467]
1073	ENSG00000072832	-0.760792	-0.157573	-2.57557	0.0133268	0.103005	-3.02266	NOT	CRMP1	collapsin response mediator protein 1 [Source:HGNC Symbol;Acc:HGNC:2365]
1074	ENSG00000072840	0.206474	-2.10191	0.615399	0.541359	0.723698	-5.64836	NOT	EVC	EvC ciliary complex subunit 1 [Source:HGNC Symbol;Acc:HGNC:3497]
1075	ENSG00000072849	0.0303854	5.32312	0.273691	0.785561	0.888947	-6.53898	NOT	DERL2	derlin 2 [Source:HGNC Symbol;Acc:HGNC:17943]
1076	ENSG00000072858	-0.111025	5.91861	-0.727207	0.470827	0.668669	-6.32997	NOT	SIDT1	SID1 transmembrane family member 1 [Source:HGNC Symbol;Acc:HGNC:25967]
1077	ENSG00000072864	0.533497	5.94314	2.92015	0.00542741	0.0705476	-2.67952	NOT	NDE1	nudE neurodevelopment protein 1 [Source:HGNC Symbol;Acc:HGNC:17619]
1078	ENSG00000072952	-0.00397786	0.563433	-0.00996737	0.992091	0.995994	-6.04082	NOT	MRVI1	murine retrovirus integration site 1 homolog [Source:HGNC Symbol;Acc:HGNC:7237]
1079	ENSG00000072954	-0.511495	1.70422	-2.81498	0.007186	0.079532	-2.62084	NOT	TMEM38A	transmembrane protein 38A [Source:HGNC Symbol;Acc:HGNC:28462]
1080	ENSG00000072958	-0.384407	6.80449	-2.69799	0.00975459	0.0899976	-3.21658	NOT	AP1M1	adaptor related protein complex 1 subunit mu 1 [Source:HGNC Symbol;Acc:HGNC:13667]
1081	ENSG00000073050	-0.0795236	4.67323	-0.637416	0.52705	0.712708	-6.33716	NOT	XRCC1	X-ray repair cross complementing 1 [Source:HGNC Symbol;Acc:HGNC:12828]
1082	ENSG00000073060	-0.442157	4.01052	-2.46832	0.0173982	0.115356	-3.62994	NOT	SCARB1	scavenger receptor class B member 1 [Source:HGNC Symbol;Acc:HGNC:1664]
1083	ENSG00000073067	-0.375114	-0.527259	-1.29269	0.202648	0.410519	-5.1533	NOT	CYP2W1	cytochrome P450 family 2 subfamily W member 1 [Source:HGNC Symbol;Acc:HGNC:20243]
1084	ENSG00000073111	-0.259447	2.39043	-1.27105	0.210175	0.419015	-5.49277	NOT	MCM2	minichromosome maintenance complex component 2 [Source:HGNC Symbol;Acc:HGNC:6944]
1085	ENSG00000073146	0.286385	-1.69854	0.699045	0.488085	0.682646	-5.61841	NOT	MOV10L1	Mov10 like RISC complex RNA helicase 1 [Source:HGNC Symbol;Acc:HGNC:7201]
5103	ENSG00000128342	3.95945	-0.284823	5.42526	2.15e-06	0.00158905	4.6499	UP	LIF	LIF interleukin 6 family cytokine [Source:HGNC Symbol;Acc:HGNC:6596]
1087	ENSG00000073169	-0.298435	7.2093	-2.33733	0.0238819	0.13355	-4.0127	NOT	SELENOO	selenoprotein O [Source:HGNC Symbol;Acc:HGNC:30395]
1088	ENSG00000073282	-0.631901	-0.120526	-1.89867	0.0639643	0.217647	-4.31724	NOT	TP63	tumor protein p63 [Source:HGNC Symbol;Acc:HGNC:15979]
1089	ENSG00000073331	0.399475	6.28245	1.70982	0.0941161	0.267799	-5.17768	NOT	ALPK1	alpha kinase 1 [Source:HGNC Symbol;Acc:HGNC:20917]
1090	ENSG00000073350	-0.470858	6.29981	-2.43194	0.0190171	0.120217	-3.8114	NOT	LLGL2	LLGL scribble cell polarity complex component 2 [Source:HGNC Symbol;Acc:HGNC:6629]
1091	ENSG00000073417	0.174733	5.80945	1.08373	0.284196	0.498529	-6.01	NOT	PDE8A	phosphodiesterase 8A [Source:HGNC Symbol;Acc:HGNC:8793]
1092	ENSG00000073464	0.385142	1.93569	1.54652	0.12891	0.318579	-5.06454	NOT	CLCN4	chloride voltage-gated channel 4 [Source:HGNC Symbol;Acc:HGNC:2022]
1093	ENSG00000073536	-0.569537	2.45358	-2.91963	0.00543493	0.0705476	-2.44119	NOT	NLE1	notchless homolog 1 [Source:HGNC Symbol;Acc:HGNC:19889]
1094	ENSG00000073584	-0.490802	0.326838	-2.12218	0.0393023	0.170346	-3.958	NOT	SMARCE1	SWI/SNF related, matrix associated, actin dependent regulator of chromatin, subfamily e, member 1 [Source:HGNC Symbol;Acc:HGNC:11109]
1095	ENSG00000073598	-0.916168	-1.1546	-3.00701	0.00428684	0.0646521	-2.01986	NOT	FNDC8	fibronectin type III domain containing 8 [Source:HGNC Symbol;Acc:HGNC:25286]
1096	ENSG00000073605	-0.623251	5.72448	-2.2308	0.0306699	0.151013	-4.22161	NOT	GSDMB	gasdermin B [Source:HGNC Symbol;Acc:HGNC:23690]
1097	ENSG00000073614	0.278501	7.08573	2.42931	0.0191395	0.120501	-3.81877	NOT	KDM5A	lysine demethylase 5A [Source:HGNC Symbol;Acc:HGNC:9886]
1098	ENSG00000073670	-0.482513	-0.0218049	-1.72603	0.0911325	0.263602	-4.60262	NOT	ADAM11	ADAM metallopeptidase domain 11 [Source:HGNC Symbol;Acc:HGNC:189]
1099	ENSG00000073711	0.176735	2.08054	0.957019	0.343618	0.55646	-5.78273	NOT	PPP2R3A	protein phosphatase 2 regulatory subunit B''alpha [Source:HGNC Symbol;Acc:HGNC:9307]
1100	ENSG00000073712	0.0414248	-2.77265	0.117157	0.907252	0.957136	-5.78417	NOT	FERMT2	fermitin family member 2 [Source:HGNC Symbol;Acc:HGNC:15767]
1101	ENSG00000073734	-0.0958348	-2.74728	-0.264938	0.792255	0.892941	-5.75989	NOT	ABCB11	ATP binding cassette subfamily B member 11 [Source:HGNC Symbol;Acc:HGNC:42]
1102	ENSG00000073737	0.103883	2.47156	0.421789	0.675167	0.820334	-6.19435	NOT	DHRS9	dehydrogenase/reductase 9 [Source:HGNC Symbol;Acc:HGNC:16888]
1103	ENSG00000073754	-0.259374	-2.26718	-0.744792	0.460229	0.66022	-5.56099	NOT	CD5L	CD5 molecule like [Source:HGNC Symbol;Acc:HGNC:1690]
4936	ENSG00000126262	3.91317	4.03049	3.36436	0.00156619	0.0447813	-1.36304	UP	FFAR2	free fatty acid receptor 2 [Source:HGNC Symbol;Acc:HGNC:4501]
1105	ENSG00000073792	0.259799	4.17072	1.06059	0.294476	0.509445	-5.93827	NOT	IGF2BP2	insulin like growth factor 2 mRNA binding protein 2 [Source:HGNC Symbol;Acc:HGNC:28867]
1106	ENSG00000073803	0.280102	3.54768	1.79227	0.0797439	0.244699	-4.87749	NOT	MAP3K13	mitogen-activated protein kinase kinase kinase 13 [Source:HGNC Symbol;Acc:HGNC:6852]
1107	ENSG00000073849	-0.400835	6.84631	-1.88109	0.0663712	0.221773	-4.89088	NOT	ST6GAL1	ST6 beta-galactoside alpha-2,6-sialyltransferase 1 [Source:HGNC Symbol;Acc:HGNC:10860]
1108	ENSG00000073861	-0.485625	5.85181	-2.0292	0.0483155	0.188976	-4.61589	NOT	TBX21	T-box transcription factor 21 [Source:HGNC Symbol;Acc:HGNC:11599]
1109	ENSG00000073910	0.382864	6.39471	1.79501	0.0793005	0.243766	-5.03838	NOT	FRY	FRY microtubule binding protein [Source:HGNC Symbol;Acc:HGNC:20367]
1110	ENSG00000073921	0.390559	8.52565	1.99094	0.0525164	0.196505	-4.68199	NOT	PICALM	phosphatidylinositol binding clathrin assembly protein [Source:HGNC Symbol;Acc:HGNC:15514]
1111	ENSG00000073969	-0.0503393	4.92083	-0.512204	0.610987	0.775949	-6.42521	NOT	NSF	N-ethylmaleimide sensitive factor, vesicle fusing ATPase [Source:HGNC Symbol;Acc:HGNC:8016]
10039	ENSG00000167434	3.87418	2.06325	3.78258	0.000451261	0.0273275	-0.113538	UP	CA4	carbonic anhydrase 4 [Source:HGNC Symbol;Acc:HGNC:1375]
1113	ENSG00000074054	0.261558	6.34834	1.74925	0.0869951	0.256504	-5.1142	NOT	CLASP1	cytoplasmic linker associated protein 1 [Source:HGNC Symbol;Acc:HGNC:17088]
1114	ENSG00000074071	-0.52746	4.9427	-2.46274	0.0176382	0.116094	-3.70847	NOT	MRPS34	mitochondrial ribosomal protein S34 [Source:HGNC Symbol;Acc:HGNC:16618]
1115	ENSG00000074181	-0.364324	-0.785186	-1.43343	0.158576	0.356982	-4.95946	NOT	NOTCH3	notch receptor 3 [Source:HGNC Symbol;Acc:HGNC:7883]
1116	ENSG00000074201	-0.288555	5.49897	-2.16952	0.0353074	0.161238	-4.33918	NOT	CLNS1A	chloride nucleotide-sensitive channel 1A [Source:HGNC Symbol;Acc:HGNC:2080]
1117	ENSG00000074211	0.437445	-2.98236	1.15501	0.254121	0.467429	-5.17027	NOT	PPP2R2C	protein phosphatase 2 regulatory subunit Bgamma [Source:HGNC Symbol;Acc:HGNC:9306]
1118	ENSG00000074219	-0.775612	2.17759	-2.1677	0.0354541	0.161455	-4.05269	NOT	TEAD2	TEA domain transcription factor 2 [Source:HGNC Symbol;Acc:HGNC:11715]
1119	ENSG00000074266	0.0941114	4.60839	0.576701	0.566985	0.742156	-6.36816	NOT	EED	embryonic ectoderm development [Source:HGNC Symbol;Acc:HGNC:3188]
1120	ENSG00000074276	0.227546	2.89121	1.03407	0.306571	0.520547	-5.8131	NOT	CDHR2	cadherin related family member 2 [Source:HGNC Symbol;Acc:HGNC:18231]
1121	ENSG00000074319	0.469792	6.05851	3.1983	0.00251829	0.0529995	-1.97624	NOT	TSG101	tumor susceptibility 101 [Source:HGNC Symbol;Acc:HGNC:15971]
1122	ENSG00000074356	-0.00959885	6.11407	-0.1248	0.901232	0.953422	-6.58893	NOT	NCBP3	nuclear cap binding subunit 3 [Source:HGNC Symbol;Acc:HGNC:24612]
1123	ENSG00000074370	-0.269259	8.95629	-1.64492	0.106882	0.285893	-5.26223	NOT	ATP2A3	ATPase sarcoplasmic/endoplasmic reticulum Ca2+ transporting 3 [Source:HGNC Symbol;Acc:HGNC:813]
1124	ENSG00000074410	0.875337	-2.2209	2.133	0.0383561	0.167971	-3.80084	NOT	CA12	carbonic anhydrase 12 [Source:HGNC Symbol;Acc:HGNC:1371]
1125	ENSG00000074416	0.900121	4.467	2.86994	0.00620992	0.075077	-2.73385	NOT	MGLL	monoglyceride lipase [Source:HGNC Symbol;Acc:HGNC:17038]
1126	ENSG00000074527	-0.0328352	0.0695572	-0.101316	0.919745	0.963255	-5.98238	NOT	NTN4	netrin 4 [Source:HGNC Symbol;Acc:HGNC:13658]
1127	ENSG00000074582	-0.416302	3.65386	-1.6573	0.104344	0.282474	-5.11231	NOT	BCS1L	BCS1 homolog, ubiquinol-cytochrome c reductase complex chaperone [Source:HGNC Symbol;Acc:HGNC:1020]
1128	ENSG00000074590	-0.449099	0.292973	-0.946612	0.34884	0.561581	-5.58816	NOT	NUAK1	NUAK family kinase 1 [Source:HGNC Symbol;Acc:HGNC:14311]
1129	ENSG00000074603	-0.151055	5.85156	-1.29428	0.202104	0.409916	-5.76747	NOT	DPP8	dipeptidyl peptidase 8 [Source:HGNC Symbol;Acc:HGNC:16490]
1130	ENSG00000074621	-0.330812	4.08332	-2.95549	0.00493289	0.0678575	-2.50583	NOT	SLC24A1	solute carrier family 24 member 1 [Source:HGNC Symbol;Acc:HGNC:10975]
1131	ENSG00000074657	-0.152685	3.88785	-1.14625	0.257686	0.471336	-5.82013	NOT	ZNF532	zinc finger protein 532 [Source:HGNC Symbol;Acc:HGNC:30940]
1132	ENSG00000074660	0.782846	5.29468	2.02862	0.0483768	0.189086	-4.59779	NOT	SCARF1	scavenger receptor class F member 1 [Source:HGNC Symbol;Acc:HGNC:16820]
1133	ENSG00000074695	-0.168401	5.32624	-1.00955	0.318051	0.531719	-6.07145	NOT	LMAN1	lectin, mannose binding 1 [Source:HGNC Symbol;Acc:HGNC:6631]
1134	ENSG00000074696	-0.156733	3.64744	-1.10892	0.273294	0.487575	-5.8341	NOT	HACD3	3-hydroxyacyl-CoA dehydratase 3 [Source:HGNC Symbol;Acc:HGNC:24175]
1135	ENSG00000074706	0.327238	2.0837	1.14201	0.259426	0.4731	-5.59508	NOT	IPCEF1	interaction protein for cytohesin exchange factors 1 [Source:HGNC Symbol;Acc:HGNC:21204]
1136	ENSG00000074755	-0.200701	7.66296	-1.80596	0.0775455	0.24095	-5.01601	NOT	ZZEF1	zinc finger ZZ-type and EF-hand domain containing 1 [Source:HGNC Symbol;Acc:HGNC:29027]
1137	ENSG00000074800	-0.220373	9.00775	-1.37089	0.177137	0.379904	-5.65561	NOT	ENO1	enolase 1 [Source:HGNC Symbol;Acc:HGNC:3350]
1138	ENSG00000074803	0.997878	3.03051	1.87913	0.0666448	0.222171	-4.65925	NOT	SLC12A1	solute carrier family 12 member 1 [Source:HGNC Symbol;Acc:HGNC:10910]
1139	ENSG00000074842	-0.231307	5.54687	-1.31488	0.195142	0.401722	-5.73382	NOT	MYDGF	myeloid derived growth factor [Source:HGNC Symbol;Acc:HGNC:16948]
1140	ENSG00000074855	-0.638362	5.13803	-4.33321	8.03e-05	0.0119712	1.28024	NOT	ANO8	anoctamin 8 [Source:HGNC Symbol;Acc:HGNC:29329]
1141	ENSG00000074935	0.258918	3.05022	1.36095	0.180236	0.383651	-5.4585	NOT	TUBE1	tubulin epsilon 1 [Source:HGNC Symbol;Acc:HGNC:20775]
1142	ENSG00000074964	-0.673102	5.69313	-3.0421	0.00389323	0.0623701	-2.37016	NOT	ARHGEF10L	Rho guanine nucleotide exchange factor 10 like [Source:HGNC Symbol;Acc:HGNC:25540]
1143	ENSG00000074966	-0.399056	6.50985	-1.52338	0.134589	0.325811	-5.46398	NOT	TXK	TXK tyrosine kinase [Source:HGNC Symbol;Acc:HGNC:12434]
1144	ENSG00000075035	-0.168988	-1.42241	-0.57283	0.569582	0.744051	-5.71136	NOT	WSCD2	WSC domain containing 2 [Source:HGNC Symbol;Acc:HGNC:29117]
1145	ENSG00000075073	0.343217	0.980933	1.35299	0.182746	0.386576	-5.21626	NOT	TACR2	tachykinin receptor 2 [Source:HGNC Symbol;Acc:HGNC:11527]
1146	ENSG00000075089	0.895462	-1.32699	3.22849	0.00231197	0.051349	-1.48599	NOT	ACTR6	actin related protein 6 [Source:HGNC Symbol;Acc:HGNC:24025]
1147	ENSG00000075131	-0.0910613	1.43371	-0.636179	0.527849	0.713276	-5.9505	NOT	TIPIN	TIMELESS interacting protein [Source:HGNC Symbol;Acc:HGNC:30750]
1148	ENSG00000075142	-0.0308379	5.13405	-0.301374	0.764503	0.877014	-6.52254	NOT	SRI	sorcin [Source:HGNC Symbol;Acc:HGNC:11292]
1149	ENSG00000075151	0.49835	6.67768	3.32919	0.00173361	0.0470206	-1.63425	NOT	EIF4G3	eukaryotic translation initiation factor 4 gamma 3 [Source:HGNC Symbol;Acc:HGNC:3298]
1150	ENSG00000075188	-0.0603407	2.51216	-0.554934	0.581659	0.75278	-6.13802	NOT	NUP37	nucleoporin 37 [Source:HGNC Symbol;Acc:HGNC:29929]
1151	ENSG00000075213	0.0744765	-0.404874	0.201115	0.841506	0.920712	-5.91994	NOT	SEMA3A	semaphorin 3A [Source:HGNC Symbol;Acc:HGNC:10723]
1152	ENSG00000075218	-0.201155	0.947929	-0.759409	0.451527	0.653423	-5.81038	NOT	GTSE1	G2 and S-phase expressed 1 [Source:HGNC Symbol;Acc:HGNC:13698]
1153	ENSG00000075223	-0.13037	3.17632	-0.680183	0.499837	0.692308	-6.15007	NOT	SEMA3C	semaphorin 3C [Source:HGNC Symbol;Acc:HGNC:10725]
1154	ENSG00000075234	-0.340616	5.94954	-1.70659	0.0947207	0.268399	-5.1785	NOT	TTC38	tetratricopeptide repeat domain 38 [Source:HGNC Symbol;Acc:HGNC:26082]
1155	ENSG00000075239	-0.272461	3.62648	-2.84912	0.0065641	0.0772848	-2.72378	NOT	ACAT1	acetyl-CoA acetyltransferase 1 [Source:HGNC Symbol;Acc:HGNC:93]
1156	ENSG00000075240	-0.469051	5.65959	-2.93188	0.00525835	0.0698485	-2.64534	NOT	GRAMD4	GRAM domain containing 4 [Source:HGNC Symbol;Acc:HGNC:29113]
1157	ENSG00000075275	-0.15189	3.11349	-0.491192	0.625653	0.786603	-6.25212	NOT	CELSR1	cadherin EGF LAG seven-pass G-type receptor 1 [Source:HGNC Symbol;Acc:HGNC:1850]
1158	ENSG00000075290	-0.0222521	0.534158	-0.113577	0.910073	0.958478	-6.03163	NOT	WNT8B	Wnt family member 8B [Source:HGNC Symbol;Acc:HGNC:12789]
1159	ENSG00000075292	-0.161936	6.88888	-1.5513	0.127761	0.316684	-5.42373	NOT	ZNF638	zinc finger protein 638 [Source:HGNC Symbol;Acc:HGNC:17894]
1160	ENSG00000075303	0.119094	4.12506	0.7765	0.441474	0.644766	-6.19037	NOT	SLC25A40	solute carrier family 25 member 40 [Source:HGNC Symbol;Acc:HGNC:29680]
1161	ENSG00000075336	-0.161744	3.04737	-0.73907	0.463663	0.662622	-6.09336	NOT	TIMM21	translocase of inner mitochondrial membrane 21 [Source:HGNC Symbol;Acc:HGNC:25010]
1162	ENSG00000075340	-0.437211	2.51152	-1.33541	0.18839	0.393411	-5.43003	NOT	ADD2	adducin 2 [Source:HGNC Symbol;Acc:HGNC:244]
1163	ENSG00000075391	-0.0705429	0.671859	-0.245432	0.807226	0.901841	-6.02499	NOT	RASAL2	RAS protein activator like 2 [Source:HGNC Symbol;Acc:HGNC:9874]
1164	ENSG00000075399	-0.370453	5.74042	-1.60419	0.115597	0.299125	-5.33454	NOT	VPS9D1	VPS9 domain containing 1 [Source:HGNC Symbol;Acc:HGNC:13526]
1165	ENSG00000075413	0.0269138	7.26868	0.367562	0.714905	0.845731	-6.53064	NOT	MARK3	microtubule affinity regulating kinase 3 [Source:HGNC Symbol;Acc:HGNC:6897]
1166	ENSG00000075415	-0.16909	8.47657	-1.56912	0.123553	0.310324	-5.38435	NOT	SLC25A3	solute carrier family 25 member 3 [Source:HGNC Symbol;Acc:HGNC:10989]
1907	ENSG00000100024	3.84937	2.17336	5.01836	8.47e-06	0.00343984	3.52349	UP	UPB1	beta-ureidopropionase 1 [Source:HGNC Symbol;Acc:HGNC:16297]
4743	ENSG00000124575	3.83212	0.289233	3.3239	0.0017602	0.04737	-1.27562	UP	H1-3	H1.3 linker histone, cluster member [Source:HGNC Symbol;Acc:HGNC:4717]
1169	ENSG00000075461	0.0835813	-1.8649	0.273788	0.785487	0.888944	-5.8032	NOT	CACNG4	calcium voltage-gated channel auxiliary subunit gamma 4 [Source:HGNC Symbol;Acc:HGNC:1408]
1170	ENSG00000075539	0.0107128	6.31703	0.0686574	0.945563	0.974613	-6.59642	NOT	FRYL	FRY like transcription coactivator [Source:HGNC Symbol;Acc:HGNC:29127]
1171	ENSG00000075568	0.00476075	6.66203	0.0364835	0.971057	0.985901	-6.59947	NOT	TMEM131	transmembrane protein 131 [Source:HGNC Symbol;Acc:HGNC:30366]
1172	ENSG00000075618	-0.0739451	2.98395	-0.368562	0.714165	0.845314	-6.28539	NOT	FSCN1	fascin actin-bundling protein 1 [Source:HGNC Symbol;Acc:HGNC:11148]
1173	ENSG00000075624	-0.50695	11.8956	-2.74041	0.00873867	0.0855764	-3.04857	NOT	ACTB	actin beta [Source:HGNC Symbol;Acc:HGNC:132]
1174	ENSG00000075643	-0.0512342	-1.59536	-0.171408	0.864663	0.933546	-5.84045	NOT	MOCOS	molybdenum cofactor sulfurase [Source:HGNC Symbol;Acc:HGNC:18234]
1175	ENSG00000075651	0.366341	3.69689	1.88283	0.0661296	0.221382	-4.73945	NOT	PLD1	phospholipase D1 [Source:HGNC Symbol;Acc:HGNC:9067]
1176	ENSG00000075702	-0.27899	2.38705	-1.55231	0.12752	0.316434	-5.11785	NOT	WDR62	WD repeat domain 62 [Source:HGNC Symbol;Acc:HGNC:24502]
1177	ENSG00000075711	-0.0279927	5.65735	-0.242282	0.809651	0.903138	-6.55842	NOT	DLG1	discs large MAGUK scaffold protein 1 [Source:HGNC Symbol;Acc:HGNC:2900]
1178	ENSG00000075785	0.215373	7.92785	1.89191	0.0648805	0.219209	-4.86607	NOT	RAB7A	RAB7A, member RAS oncogene family [Source:HGNC Symbol;Acc:HGNC:9788]
1179	ENSG00000075790	-0.0688606	4.3587	-0.735833	0.465611	0.664603	-6.24447	NOT	BCAP29	B cell receptor associated protein 29 [Source:HGNC Symbol;Acc:HGNC:24131]
1180	ENSG00000075826	-0.391212	6.01359	-2.85771	0.00641574	0.0763186	-2.83305	NOT	SEC31B	SEC31 homolog B, COPII coat complex component [Source:HGNC Symbol;Acc:HGNC:23197]
1181	ENSG00000075856	0.169128	4.96394	1.07076	0.289926	0.504893	-5.9911	NOT	SART3	spliceosome associated factor 3, U4/U6 recycling protein [Source:HGNC Symbol;Acc:HGNC:16860]
8997	ENSG00000162551	3.81236	4.1155	3.17334	0.00270184	0.0547288	-1.87201	UP	ALPL	alkaline phosphatase, biomineralization associated [Source:HGNC Symbol;Acc:HGNC:438]
1183	ENSG00000075891	0.60062	-2.47822	1.71457	0.0932336	0.266739	-4.48086	NOT	PAX2	paired box 2 [Source:HGNC Symbol;Acc:HGNC:8616]
1184	ENSG00000075914	0.0351514	3.28835	0.213339	0.832016	0.915395	-6.36913	NOT	EXOSC7	exosome component 7 [Source:HGNC Symbol;Acc:HGNC:28112]
1185	ENSG00000075945	0.180447	4.40397	1.16094	0.251724	0.464821	-5.85217	NOT	KIFAP3	kinesin associated protein 3 [Source:HGNC Symbol;Acc:HGNC:17060]
1186	ENSG00000075975	0.207284	4.78251	2.06649	0.0445052	0.180618	-4.50447	NOT	MKRN2	makorin ring finger protein 2 [Source:HGNC Symbol;Acc:HGNC:7113]
1187	ENSG00000076003	0.0662212	4.81393	0.323411	0.747867	0.866532	-6.49684	NOT	MCM6	minichromosome maintenance complex component 6 [Source:HGNC Symbol;Acc:HGNC:6949]
1188	ENSG00000076043	-0.0345117	3.31151	-0.252052	0.802136	0.899209	-6.36395	NOT	REXO2	RNA exonuclease 2 [Source:HGNC Symbol;Acc:HGNC:17851]
1189	ENSG00000076067	0.135928	3.88585	0.895523	0.375224	0.587309	-6.06708	NOT	RBMS2	RNA binding motif single stranded interacting protein 2 [Source:HGNC Symbol;Acc:HGNC:9909]
1190	ENSG00000076108	0.0170124	8.23346	0.0988638	0.921681	0.964027	-6.58458	NOT	BAZ2A	bromodomain adjacent to zinc finger domain 2A [Source:HGNC Symbol;Acc:HGNC:962]
1191	ENSG00000076201	-0.407567	6.05178	-3.39233	0.00144416	0.0429545	-1.46047	NOT	PTPN23	protein tyrosine phosphatase non-receptor type 23 [Source:HGNC Symbol;Acc:HGNC:14406]
1192	ENSG00000076242	0.121454	4.95218	1.15779	0.252995	0.466295	-5.89607	NOT	MLH1	mutL homolog 1 [Source:HGNC Symbol;Acc:HGNC:7127]
1193	ENSG00000076248	-0.375419	2.88149	-1.66289	0.103214	0.280771	-5.01327	NOT	UNG	uracil DNA glycosylase [Source:HGNC Symbol;Acc:HGNC:12572]
1194	ENSG00000076258	-0.534339	1.11584	-1.9915	0.052453	0.196424	-4.26609	NOT	FMO4	flavin containing dimethylaniline monoxygenase 4 [Source:HGNC Symbol;Acc:HGNC:3772]
1195	ENSG00000076321	0.0535401	4.51057	0.342107	0.733847	0.857734	-6.46778	NOT	KLHL20	kelch like family member 20 [Source:HGNC Symbol;Acc:HGNC:25056]
1196	ENSG00000076351	-0.337194	-0.62488	-1.27304	0.209476	0.418184	-5.16872	NOT	SLC46A1	solute carrier family 46 member 1 [Source:HGNC Symbol;Acc:HGNC:30521]
1197	ENSG00000076356	0.410864	3.08067	1.786	0.0807679	0.246346	-4.83225	NOT	PLXNA2	plexin A2 [Source:HGNC Symbol;Acc:HGNC:9100]
17796	ENSG00000255398	3.78809	2.17118	4.60113	3.37e-05	0.0069119	2.25411	UP	HCAR3	hydroxycarboxylic acid receptor 3 [Source:HGNC Symbol;Acc:HGNC:16824]
15592	ENSG00000229951	3.80248	-0.194906	5.40165	2.33e-06	0.00164152	4.58586	UP	AC104695.2	novel transcript, antisense to FOSL2
1200	ENSG00000076555	-0.122634	4.34934	-0.922105	0.361341	0.574287	-6.09186	NOT	ACACB	acetyl-CoA carboxylase beta [Source:HGNC Symbol;Acc:HGNC:85]
1201	ENSG00000076604	0.551477	5.00418	1.92812	0.0600978	0.210754	-4.76899	NOT	TRAF4	TNF receptor associated factor 4 [Source:HGNC Symbol;Acc:HGNC:12034]
1202	ENSG00000076641	0.0716015	7.34786	0.393886	0.695506	0.83361	-6.52016	NOT	PAG1	phosphoprotein membrane anchor with glycosphingolipid microdomains 1 [Source:HGNC Symbol;Acc:HGNC:30043]
1203	ENSG00000076650	-0.098941	3.62928	-0.902672	0.371457	0.583892	-6.0335	NOT	GPATCH1	G-patch domain containing 1 [Source:HGNC Symbol;Acc:HGNC:24658]
1204	ENSG00000076662	-0.00915733	5.68522	-0.042314	0.966434	0.984449	-6.5877	NOT	ICAM3	intercellular adhesion molecule 3 [Source:HGNC Symbol;Acc:HGNC:5346]
1205	ENSG00000076685	0.370099	6.83816	2.61512	0.0120596	0.0991239	-3.40797	NOT	NT5C2	5'-nucleotidase, cytosolic II [Source:HGNC Symbol;Acc:HGNC:8022]
1206	ENSG00000076706	0.149184	-1.52255	0.352727	0.725923	0.852163	-5.79905	NOT	MCAM	melanoma cell adhesion molecule [Source:HGNC Symbol;Acc:HGNC:6934]
1207	ENSG00000076716	-0.00193335	-0.393021	-0.00493199	0.996086	0.998109	-5.94104	NOT	GPC4	glypican 4 [Source:HGNC Symbol;Acc:HGNC:4452]
1208	ENSG00000076770	0.216965	2.27759	0.812766	0.420587	0.6266	-5.93195	NOT	MBNL3	muscleblind like splicing regulator 3 [Source:HGNC Symbol;Acc:HGNC:20564]
1209	ENSG00000076826	-0.00621213	-0.939103	-0.0176259	0.986014	0.993151	-5.89579	NOT	CAMSAP3	calmodulin regulated spectrin associated protein family member 3 [Source:HGNC Symbol;Acc:HGNC:29307]
1210	ENSG00000076864	0.667053	2.33006	1.04384	0.302076	0.516267	-5.72505	NOT	RAP1GAP	RAP1 GTPase activating protein [Source:HGNC Symbol;Acc:HGNC:9858]
1211	ENSG00000076924	0.0164161	6.9631	0.0861013	0.931764	0.968403	-6.59603	NOT	XAB2	XPA binding protein 2 [Source:HGNC Symbol;Acc:HGNC:14089]
1212	ENSG00000076928	-0.657032	10.0464	-2.98383	0.00456702	0.0661803	-2.4935	NOT	ARHGEF1	Rho guanine nucleotide exchange factor 1 [Source:HGNC Symbol;Acc:HGNC:681]
1213	ENSG00000076944	0.0393308	7.95242	0.175338	0.861593	0.931979	-6.5772	NOT	STXBP2	syntaxin binding protein 2 [Source:HGNC Symbol;Acc:HGNC:11445]
1214	ENSG00000076984	-0.0686428	6.79858	-0.577293	0.566589	0.74198	-6.43343	NOT	MAP2K7	mitogen-activated protein kinase kinase 7 [Source:HGNC Symbol;Acc:HGNC:6847]
1215	ENSG00000077009	0.531449	-2.84068	1.59705	0.117182	0.301347	-4.63704	NOT	NMRK2	nicotinamide riboside kinase 2 [Source:HGNC Symbol;Acc:HGNC:17871]
1216	ENSG00000077044	-0.293006	8.27499	-1.92688	0.0602575	0.211136	-4.7999	NOT	DGKD	diacylglycerol kinase delta [Source:HGNC Symbol;Acc:HGNC:2851]
1217	ENSG00000077063	-0.682933	-1.18643	-1.75118	0.0866579	0.255765	-4.48672	NOT	CTTNBP2	cortactin binding protein 2 [Source:HGNC Symbol;Acc:HGNC:15679]
1218	ENSG00000077080	0.00461782	-3.22018	0.0125469	0.990044	0.994992	-5.76941	NOT	ACTL6B	actin like 6B [Source:HGNC Symbol;Acc:HGNC:160]
1219	ENSG00000077092	0.269956	-0.305032	0.803821	0.425683	0.630431	-5.64053	NOT	RARB	retinoic acid receptor beta [Source:HGNC Symbol;Acc:HGNC:9865]
1220	ENSG00000077097	-0.0446632	7.20665	-0.35073	0.727411	0.853226	-6.53696	NOT	TOP2B	DNA topoisomerase II beta [Source:HGNC Symbol;Acc:HGNC:11990]
1221	ENSG00000077147	0.45358	7.17971	2.73781	0.00879798	0.0857534	-3.12316	NOT	TM9SF3	transmembrane 9 superfamily member 3 [Source:HGNC Symbol;Acc:HGNC:21529]
1222	ENSG00000077150	0.722455	8.09318	2.55563	0.0140106	0.105515	-3.53467	NOT	NFKB2	nuclear factor kappa B subunit 2 [Source:HGNC Symbol;Acc:HGNC:7795]
1223	ENSG00000077152	-0.233415	-0.165965	-0.886055	0.38025	0.592001	-5.59355	NOT	UBE2T	ubiquitin conjugating enzyme E2 T [Source:HGNC Symbol;Acc:HGNC:25009]
1224	ENSG00000077157	0.306802	5.55534	1.50796	0.138483	0.330946	-5.47213	NOT	PPP1R12B	protein phosphatase 1 regulatory subunit 12B [Source:HGNC Symbol;Acc:HGNC:7619]
1225	ENSG00000077232	-0.351304	5.90856	-2.42842	0.0191809	0.120555	-3.81486	NOT	DNAJC10	DnaJ heat shock protein family (Hsp40) member C10 [Source:HGNC Symbol;Acc:HGNC:24637]
1226	ENSG00000077235	-0.163086	6.5625	-1.39412	0.170056	0.371209	-5.64523	NOT	GTF3C1	general transcription factor IIIC subunit 1 [Source:HGNC Symbol;Acc:HGNC:4664]
1227	ENSG00000077238	-0.00795169	7.84262	-0.0637607	0.94944	0.976198	-6.59162	NOT	IL4R	interleukin 4 receptor [Source:HGNC Symbol;Acc:HGNC:6015]
1228	ENSG00000077254	-0.216465	6.53588	-1.99777	0.0517436	0.194916	-4.68171	NOT	USP33	ubiquitin specific peptidase 33 [Source:HGNC Symbol;Acc:HGNC:20059]
1229	ENSG00000077264	0.227491	0.00811457	0.723835	0.472875	0.669783	-5.72851	NOT	PAK3	p21 (RAC1) activated kinase 3 [Source:HGNC Symbol;Acc:HGNC:8592]
1230	ENSG00000077312	-0.366763	5.59459	-2.11745	0.0397222	0.171167	-4.44313	NOT	SNRPA	small nuclear ribonucleoprotein polypeptide A [Source:HGNC Symbol;Acc:HGNC:11151]
1231	ENSG00000077327	-0.262001	3.06735	-2.22105	0.0313695	0.152487	-4.04529	NOT	SPAG6	sperm associated antigen 6 [Source:HGNC Symbol;Acc:HGNC:11215]
1232	ENSG00000077380	-0.193733	4.67208	-1.20026	0.236254	0.447711	-5.83	NOT	DYNC1I2	dynein cytoplasmic 1 intermediate chain 2 [Source:HGNC Symbol;Acc:HGNC:2964]
1233	ENSG00000077420	-0.0670495	7.71164	-0.547757	0.586538	0.757179	-6.44481	NOT	APBB1IP	amyloid beta precursor protein binding family B member 1 interacting protein [Source:HGNC Symbol;Acc:HGNC:17379]
1234	ENSG00000077454	-0.337244	5.82055	-2.30742	0.0256372	0.138167	-4.06863	NOT	LRCH4	leucine rich repeats and calponin homology domain containing 4 [Source:HGNC Symbol;Acc:HGNC:6691]
1235	ENSG00000077458	0.0972897	5.7113	0.713291	0.479311	0.675464	-6.33547	NOT	FAM76B	family with sequence similarity 76 member B [Source:HGNC Symbol;Acc:HGNC:28492]
1236	ENSG00000077463	0.113122	5.05562	0.585739	0.560947	0.738075	-6.39229	NOT	SIRT6	sirtuin 6 [Source:HGNC Symbol;Acc:HGNC:14934]
1237	ENSG00000077498	-0.446131	-3.47188	-1.10385	0.275465	0.489726	-5.20706	NOT	TYR	tyrosinase [Source:HGNC Symbol;Acc:HGNC:12442]
1238	ENSG00000077514	0.0101977	4.25765	0.0812644	0.935588	0.970447	-6.50024	NOT	POLD3	DNA polymerase delta 3, accessory subunit [Source:HGNC Symbol;Acc:HGNC:20932]
1239	ENSG00000077522	0.352625	-2.14988	0.92195	0.361421	0.574287	-5.42819	NOT	ACTN2	actinin alpha 2 [Source:HGNC Symbol;Acc:HGNC:164]
1240	ENSG00000077549	-0.0973729	8.37635	-1.28715	0.204555	0.412888	-5.77176	NOT	CAPZB	capping actin protein of muscle Z-line subunit beta [Source:HGNC Symbol;Acc:HGNC:1491]
1241	ENSG00000077585	0.261121	4.44509	1.49342	0.142235	0.335848	-5.43073	NOT	GPR137B	G protein-coupled receptor 137B [Source:HGNC Symbol;Acc:HGNC:11862]
1242	ENSG00000077616	-0.215124	2.83898	-1.19541	0.238123	0.450177	-5.63852	NOT	NAALAD2	N-acetylated alpha-linked acidic dipeptidase 2 [Source:HGNC Symbol;Acc:HGNC:14526]
1243	ENSG00000077684	0.338123	4.95483	2.60007	0.012528	0.100427	-3.40415	NOT	JADE1	jade family PHD finger 1 [Source:HGNC Symbol;Acc:HGNC:30027]
1244	ENSG00000077713	-0.446803	3.40752	-2.36664	0.0222672	0.130051	-3.78688	NOT	SLC25A43	solute carrier family 25 member 43 [Source:HGNC Symbol;Acc:HGNC:30557]
1245	ENSG00000077721	0.312663	6.31296	2.16813	0.0354196	0.161453	-4.35649	NOT	UBE2A	ubiquitin conjugating enzyme E2 A [Source:HGNC Symbol;Acc:HGNC:12472]
1246	ENSG00000077782	0.0184776	3.31974	0.0947368	0.92494	0.965039	-6.39167	NOT	FGFR1	fibroblast growth factor receptor 1 [Source:HGNC Symbol;Acc:HGNC:3688]
1247	ENSG00000077800	0.543488	-2.65021	1.15937	0.252357	0.465617	-5.17936	NOT	FKBP6	FKBP prolyl isomerase 6 [Source:HGNC Symbol;Acc:HGNC:3722]
1248	ENSG00000077935	-0.029466	1.40182	-0.164944	0.869719	0.93642	-6.12906	NOT	SMC1B	structural maintenance of chromosomes 1B [Source:HGNC Symbol;Acc:HGNC:11112]
1249	ENSG00000077942	0.216959	-2.76782	0.543111	0.589706	0.759848	-5.65342	NOT	FBLN1	fibulin 1 [Source:HGNC Symbol;Acc:HGNC:3600]
1250	ENSG00000077943	-0.219728	-2.20577	-0.475554	0.636669	0.794619	-5.71557	NOT	ITGA8	integrin subunit alpha 8 [Source:HGNC Symbol;Acc:HGNC:6144]
1251	ENSG00000077984	0.157648	6.86601	0.638475	0.526367	0.712156	-6.39653	NOT	CST7	cystatin F [Source:HGNC Symbol;Acc:HGNC:2479]
1252	ENSG00000078018	0.430787	-0.877901	1.21893	0.229156	0.440211	-5.20628	NOT	MAP2	microtubule associated protein 2 [Source:HGNC Symbol;Acc:HGNC:6839]
1253	ENSG00000078043	0.00518106	4.83995	0.0368577	0.97076	0.985901	-6.55039	NOT	PIAS2	protein inhibitor of activated STAT 2 [Source:HGNC Symbol;Acc:HGNC:17311]
1254	ENSG00000078053	-0.388922	1.80883	-1.68377	0.0990793	0.275372	-4.852	NOT	AMPH	amphiphysin [Source:HGNC Symbol;Acc:HGNC:471]
1255	ENSG00000078061	-0.127997	7.12792	-1.14368	0.258741	0.472364	-5.95209	NOT	ARAF	A-Raf proto-oncogene, serine/threonine kinase [Source:HGNC Symbol;Acc:HGNC:646]
1256	ENSG00000078070	-0.246698	5.22945	-1.85321	0.0703473	0.228557	-4.91415	NOT	MCCC1	methylcrotonoyl-CoA carboxylase 1 [Source:HGNC Symbol;Acc:HGNC:6936]
1257	ENSG00000078081	0.0268617	1.26903	0.133315	0.894532	0.950297	-6.11666	NOT	LAMP3	lysosomal associated membrane protein 3 [Source:HGNC Symbol;Acc:HGNC:14582]
9584	ENSG00000165029	3.763	4.55141	5.46268	1.89e-06	0.00145118	4.91194	UP	ABCA1	ATP binding cassette subfamily A member 1 [Source:HGNC Symbol;Acc:HGNC:29]
17892	ENSG00000256249	3.76726	2.36617	4.10555	0.000165686	0.0162995	0.789262	UP	AC026333.3	novel transcript
1260	ENSG00000078124	-0.0758787	5.4068	-0.53283	0.596746	0.765003	-6.43792	NOT	ACER3	alkaline ceramidase 3 [Source:HGNC Symbol;Acc:HGNC:16066]
1261	ENSG00000078140	0.118632	6.07381	1.13544	0.26214	0.475692	-5.95865	NOT	UBE2K	ubiquitin conjugating enzyme E2 K [Source:HGNC Symbol;Acc:HGNC:4914]
1262	ENSG00000078142	0.142911	5.5028	1.16744	0.24912	0.46203	-5.90981	NOT	PIK3C3	phosphatidylinositol 3-kinase catalytic subunit type 3 [Source:HGNC Symbol;Acc:HGNC:8974]
1263	ENSG00000078177	-0.0176981	4.76072	-0.103926	0.917685	0.961973	-6.54036	NOT	N4BP2	NEDD4 binding protein 2 [Source:HGNC Symbol;Acc:HGNC:29851]
1264	ENSG00000078246	-0.00949017	2.98214	-0.0877698	0.930445	0.967517	-6.3483	NOT	TULP3	TUB like protein 3 [Source:HGNC Symbol;Acc:HGNC:12425]
1265	ENSG00000078269	0.176512	4.63396	0.995066	0.32497	0.538334	-6.04528	NOT	SYNJ2	synaptojanin 2 [Source:HGNC Symbol;Acc:HGNC:11504]
1266	ENSG00000078295	0.518507	-1.93429	1.00909	0.318273	0.532003	-5.36116	NOT	ADCY2	adenylate cyclase 2 [Source:HGNC Symbol;Acc:HGNC:233]
1267	ENSG00000078304	-0.0120855	8.64133	-0.0774638	0.938594	0.971564	-6.58121	NOT	PPP2R5C	protein phosphatase 2 regulatory subunit B'gamma [Source:HGNC Symbol;Acc:HGNC:9311]
1268	ENSG00000078319	-0.219385	3.82162	-1.99833	0.0516808	0.194785	-4.55202	NOT	PMS2P1	PMS1 homolog 2, mismatch repair system component pseudogene 1 [Source:HGNC Symbol;Acc:HGNC:9123]
1269	ENSG00000078328	-0.117552	0.190896	-0.172225	0.864025	0.933246	-5.9846	NOT	RBFOX1	RNA binding fox-1 homolog 1 [Source:HGNC Symbol;Acc:HGNC:18222]
1270	ENSG00000078369	-0.180541	8.50991	-1.80787	0.0772439	0.240428	-5.00401	NOT	GNB1	G protein subunit beta 1 [Source:HGNC Symbol;Acc:HGNC:4396]
1271	ENSG00000078399	-0.344111	-0.905442	-1.06284	0.293466	0.508547	-5.37375	NOT	HOXA9	homeobox A9 [Source:HGNC Symbol;Acc:HGNC:5109]
3095	ENSG00000108582	3.76037	6.1159	5.01198	8.65e-06	0.00344637	3.41861	UP	CPD	carboxypeptidase D [Source:HGNC Symbol;Acc:HGNC:2301]
1273	ENSG00000078403	-0.165423	5.81773	-1.25587	0.215579	0.425086	-5.81419	NOT	MLLT10	MLLT10 histone lysine methyltransferase DOT1L cofactor [Source:HGNC Symbol;Acc:HGNC:16063]
1274	ENSG00000078487	0.217448	5.35699	1.46485	0.149842	0.346543	-5.52676	NOT	ZCWPW1	zinc finger CW-type and PWWP domain containing 1 [Source:HGNC Symbol;Acc:HGNC:23486]
1275	ENSG00000078589	0.233307	4.8522	1.27476	0.208869	0.417695	-5.75151	NOT	P2RY10	P2Y receptor family member 10 [Source:HGNC Symbol;Acc:HGNC:19906]
1276	ENSG00000078596	-0.1554	5.21119	-0.810531	0.421857	0.62746	-6.24483	NOT	ITM2A	integral membrane protein 2A [Source:HGNC Symbol;Acc:HGNC:6173]
1277	ENSG00000078618	-0.267922	6.47762	-1.58503	0.119891	0.304981	-5.37299	NOT	NRDC	nardilysin convertase [Source:HGNC Symbol;Acc:HGNC:7995]
1278	ENSG00000078668	-0.220434	5.9615	-2.28907	0.0267705	0.141227	-4.10915	NOT	VDAC3	voltage dependent anion channel 3 [Source:HGNC Symbol;Acc:HGNC:12674]
1279	ENSG00000078674	0.112896	6.9711	0.704717	0.484581	0.680179	-6.35203	NOT	PCM1	pericentriolar material 1 [Source:HGNC Symbol;Acc:HGNC:8727]
1280	ENSG00000078687	0.052736	5.97534	0.325713	0.746136	0.865478	-6.5416	NOT	TNRC6C	trinucleotide repeat containing adaptor 6C [Source:HGNC Symbol;Acc:HGNC:29318]
1281	ENSG00000078699	-0.153343	5.83378	-1.57346	0.122546	0.309068	-5.3834	NOT	CBFA2T2	CBFA2/RUNX1 partner transcriptional co-repressor 2 [Source:HGNC Symbol;Acc:HGNC:1536]
1008	ENSG00000070808	3.75384	-0.509577	4.86387	1.42e-05	0.004545	2.9712	UP	CAMK2A	calcium/calmodulin dependent protein kinase II alpha [Source:HGNC Symbol;Acc:HGNC:1460]
1283	ENSG00000078747	0.385618	6.9554	2.74956	0.00853268	0.0848688	-3.09625	NOT	ITCH	itchy E3 ubiquitin protein ligase [Source:HGNC Symbol;Acc:HGNC:13890]
1284	ENSG00000078795	0.0111563	3.64144	0.0604828	0.952036	0.977785	-6.43396	NOT	PKD2L2	polycystin 2 like 2, transient receptor potential cation channel [Source:HGNC Symbol;Acc:HGNC:9012]
1285	ENSG00000078808	-0.532807	7.10569	-3.27787	0.00200866	0.0489804	-1.76929	NOT	SDF4	stromal cell derived factor 4 [Source:HGNC Symbol;Acc:HGNC:24188]
1286	ENSG00000078814	0.139398	2.90009	1.00234	0.321483	0.535167	-5.847	NOT	MYH7B	myosin heavy chain 7B [Source:HGNC Symbol;Acc:HGNC:15906]
1287	ENSG00000078900	-0.62285	-0.426701	-2.78325	0.0078124	0.0820819	-2.55421	NOT	TP73	tumor protein p73 [Source:HGNC Symbol;Acc:HGNC:12003]
1288	ENSG00000078902	-0.101583	5.92268	-0.996611	0.324228	0.537577	-6.10101	NOT	TOLLIP	toll interacting protein [Source:HGNC Symbol;Acc:HGNC:16476]
1289	ENSG00000078967	0.0181927	1.4881	0.0910185	0.927878	0.966349	-6.14903	NOT	UBE2D4	ubiquitin conjugating enzyme E2 D4 (putative) [Source:HGNC Symbol;Acc:HGNC:21647]
1290	ENSG00000079101	0.770593	-3.37994	2.4548	0.0179846	0.116822	-3.16598	NOT	CLUL1	clusterin like 1 [Source:HGNC Symbol;Acc:HGNC:2096]
1291	ENSG00000079102	0.574653	-2.9919	1.33124	0.189745	0.395127	-4.97387	NOT	RUNX1T1	RUNX1 partner transcriptional co-repressor 1 [Source:HGNC Symbol;Acc:HGNC:1535]
1292	ENSG00000079112	-0.929726	-2.65605	-2.60483	0.0123781	0.100086	-2.8783	NOT	CDH17	cadherin 17 [Source:HGNC Symbol;Acc:HGNC:1756]
1293	ENSG00000079134	0.257058	5.79457	1.46307	0.150327	0.347161	-5.54229	NOT	THOC1	THO complex 1 [Source:HGNC Symbol;Acc:HGNC:19070]
1294	ENSG00000079150	-0.54103	-0.765171	-2.305	0.0257841	0.138635	-3.54007	NOT	FKBP7	FKBP prolyl isomerase 7 [Source:HGNC Symbol;Acc:HGNC:3723]
1295	ENSG00000079156	0.147488	-0.96381	0.34494	0.73173	0.856604	-5.83651	NOT	OSBPL6	oxysterol binding protein like 6 [Source:HGNC Symbol;Acc:HGNC:16388]
1296	ENSG00000079215	0.0149163	0.462754	0.0541514	0.957052	0.979952	-6.02759	NOT	SLC1A3	solute carrier family 1 member 3 [Source:HGNC Symbol;Acc:HGNC:10941]
1297	ENSG00000079246	-0.194636	7.47425	-1.68623	0.0986025	0.274611	-5.2138	NOT	XRCC5	X-ray repair cross complementing 5 [Source:HGNC Symbol;Acc:HGNC:12833]
1298	ENSG00000079263	0.251437	5.74354	2.05423	0.0457281	0.183219	-4.56758	NOT	SP140	SP140 nuclear body protein [Source:HGNC Symbol;Acc:HGNC:17133]
1299	ENSG00000079277	0.186261	5.60114	1.05069	0.298954	0.513931	-6.03916	NOT	MKNK1	MAPK interacting serine/threonine kinase 1 [Source:HGNC Symbol;Acc:HGNC:7110]
18787	ENSG00000263934	3.72685	0.17626	2.94896	0.00502087	0.068449	-2.18451	UP	SNORD3A	small nucleolar RNA, C/D box 3A [Source:HGNC Symbol;Acc:HGNC:33189]
1301	ENSG00000079313	-0.190232	6.65427	-1.68183	0.0994576	0.27612	-5.22386	NOT	REXO1	RNA exonuclease 1 homolog [Source:HGNC Symbol;Acc:HGNC:24616]
1302	ENSG00000079332	0.307356	7.41412	2.26204	0.0285207	0.146035	-4.16746	NOT	SAR1A	secretion associated Ras related GTPase 1A [Source:HGNC Symbol;Acc:HGNC:10534]
1303	ENSG00000079335	0.377253	6.47026	1.45567	0.152353	0.34989	-5.56099	NOT	CDC14A	cell division cycle 14A [Source:HGNC Symbol;Acc:HGNC:1718]
1304	ENSG00000079337	-0.439916	-0.693399	-1.40065	0.168105	0.368856	-5.00886	NOT	RAPGEF3	Rap guanine nucleotide exchange factor 3 [Source:HGNC Symbol;Acc:HGNC:16629]
1305	ENSG00000079387	0.26957	4.10304	1.82302	0.0748791	0.236715	-4.88553	NOT	SENP1	SUMO specific peptidase 1 [Source:HGNC Symbol;Acc:HGNC:17927]
12343	ENSG00000184270	3.72448	-0.309494	4.25007	0.000104779	0.0139243	1.21166	UP	H2AC21	H2A clustered histone 21 [Source:HGNC Symbol;Acc:HGNC:20508]
1307	ENSG00000079432	-0.0832691	7.70644	-0.773963	0.442958	0.645661	-6.29635	NOT	CIC	capicua transcriptional repressor [Source:HGNC Symbol;Acc:HGNC:14214]
1308	ENSG00000079459	-0.0319318	6.49467	-0.349242	0.72852	0.854028	-6.53861	NOT	FDFT1	farnesyl-diphosphate farnesyltransferase 1 [Source:HGNC Symbol;Acc:HGNC:3629]
1309	ENSG00000079462	-0.296728	2.40025	-1.49894	0.1408	0.33402	-5.19546	NOT	PAFAH1B3	platelet activating factor acetylhydrolase 1b catalytic subunit 3 [Source:HGNC Symbol;Acc:HGNC:8576]
1310	ENSG00000079482	0.0694784	1.49653	0.264906	0.792279	0.892941	-6.1188	NOT	OPHN1	oligophrenin 1 [Source:HGNC Symbol;Acc:HGNC:8148]
1311	ENSG00000079616	-0.212063	5.70985	-1.40857	0.165764	0.365994	-5.61543	NOT	KIF22	kinesin family member 22 [Source:HGNC Symbol;Acc:HGNC:6391]
1312	ENSG00000079691	0.152273	2.82968	0.758827	0.451872	0.653615	-6.04674	NOT	CARMIL1	capping protein regulator and myosin 1 linker 1 [Source:HGNC Symbol;Acc:HGNC:21581]
1313	ENSG00000079739	-0.0373429	4.53489	-0.309565	0.758306	0.873295	-6.48074	NOT	PGM1	phosphoglucomutase 1 [Source:HGNC Symbol;Acc:HGNC:8905]
1314	ENSG00000079785	0.0277587	5.01386	0.216595	0.829493	0.913929	-6.53808	NOT	DDX1	DEAD-box helicase 1 [Source:HGNC Symbol;Acc:HGNC:2734]
1315	ENSG00000079805	-0.337846	8.52998	-2.95894	0.00488685	0.0677298	-2.57699	NOT	DNM2	dynamin 2 [Source:HGNC Symbol;Acc:HGNC:2974]
1316	ENSG00000079819	-0.171739	3.86604	-0.990128	0.327351	0.540464	-5.98005	NOT	EPB41L2	erythrocyte membrane protein band 4.1 like 2 [Source:HGNC Symbol;Acc:HGNC:3379]
1317	ENSG00000079841	-0.0729335	-2.25158	-0.144766	0.885535	0.945295	-5.80789	NOT	RIMS1	regulating synaptic membrane exocytosis 1 [Source:HGNC Symbol;Acc:HGNC:17282]
1318	ENSG00000079931	0.0842956	-0.322036	0.281623	0.77951	0.884994	-5.90888	NOT	MOXD1	monooxygenase DBH like 1 [Source:HGNC Symbol;Acc:HGNC:21063]
1319	ENSG00000079950	-0.106029	6.39059	-0.658339	0.51364	0.702935	-6.38274	NOT	STX7	syntaxin 7 [Source:HGNC Symbol;Acc:HGNC:11442]
1320	ENSG00000079999	-0.122869	4.50339	-0.826955	0.412581	0.619951	-6.1868	NOT	KEAP1	kelch like ECH associated protein 1 [Source:HGNC Symbol;Acc:HGNC:23177]
1321	ENSG00000080007	-0.480931	0.546309	-1.29066	0.203344	0.411213	-5.25483	NOT	DDX43	DEAD-box helicase 43 [Source:HGNC Symbol;Acc:HGNC:18677]
1322	ENSG00000080031	-0.202911	-1.9996	-0.609631	0.545141	0.72655	-5.65917	NOT	PTPRH	protein tyrosine phosphatase receptor type H [Source:HGNC Symbol;Acc:HGNC:9672]
1323	ENSG00000080166	-0.42381	-1.375	-1.26478	0.212393	0.421152	-5.13054	NOT	DCT	dopachrome tautomerase [Source:HGNC Symbol;Acc:HGNC:2709]
1324	ENSG00000080189	-0.381778	6.66242	-2.46003	0.0177559	0.116344	-3.75227	NOT	SLC35C2	solute carrier family 35 member C2 [Source:HGNC Symbol;Acc:HGNC:17117]
1325	ENSG00000080200	-0.433556	3.19893	-1.20289	0.235244	0.446637	-5.67653	NOT	CRYBG3	crystallin beta-gamma domain containing 3 [Source:HGNC Symbol;Acc:HGNC:34427]
1326	ENSG00000080224	0.302283	-1.17481	0.581733	0.563619	0.739994	-5.71845	NOT	EPHA6	EPH receptor A6 [Source:HGNC Symbol;Acc:HGNC:19296]
1327	ENSG00000080298	0.73728	5.75304	2.84208	0.00668821	0.0775498	-2.86503	NOT	RFX3	regulatory factor X3 [Source:HGNC Symbol;Acc:HGNC:9984]
1328	ENSG00000080345	0.155936	5.63308	0.994802	0.325097	0.538374	-6.09616	NOT	RIF1	replication timing regulatory factor 1 [Source:HGNC Symbol;Acc:HGNC:23207]
1329	ENSG00000080371	0.627927	6.75534	3.41672	0.00134519	0.0423483	-1.39831	NOT	RAB21	RAB21, member RAS oncogene family [Source:HGNC Symbol;Acc:HGNC:18263]
1330	ENSG00000080493	0.0869183	2.08273	0.328773	0.743837	0.864001	-6.17684	NOT	SLC4A4	solute carrier family 4 member 4 [Source:HGNC Symbol;Acc:HGNC:11030]
1331	ENSG00000080503	-0.0716217	7.04167	-0.5162	0.608216	0.773978	-6.46607	NOT	SMARCA2	SWI/SNF related, matrix associated, actin dependent regulator of chromatin, subfamily a, member 2 [Source:HGNC Symbol;Acc:HGNC:11098]
1332	ENSG00000080546	0.365473	5.68817	2.57661	0.0132919	0.102889	-3.48435	NOT	SESN1	sestrin 1 [Source:HGNC Symbol;Acc:HGNC:21595]
1333	ENSG00000080561	0.619571	-0.220155	1.27564	0.208561	0.417283	-5.18995	NOT	MID2	midline 2 [Source:HGNC Symbol;Acc:HGNC:7096]
1334	ENSG00000080573	-0.508776	1.56559	-1.15131	0.255624	0.469093	-5.5296	NOT	COL5A3	collagen type V alpha 3 chain [Source:HGNC Symbol;Acc:HGNC:14864]
1335	ENSG00000080603	0.0607886	2.2271	0.220515	0.826457	0.912292	-6.22619	NOT	SRCAP	Snf2 related CREBBP activator protein [Source:HGNC Symbol;Acc:HGNC:16974]
1336	ENSG00000080608	-0.111699	4.83222	-0.962586	0.340846	0.553875	-6.09152	NOT	PUM3	pumilio RNA binding family member 3 [Source:HGNC Symbol;Acc:HGNC:29676]
1337	ENSG00000080644	-0.336207	-2.57226	-0.979906	0.332318	0.545506	-5.36062	NOT	CHRNA3	cholinergic receptor nicotinic alpha 3 subunit [Source:HGNC Symbol;Acc:HGNC:1957]
1338	ENSG00000080709	0.56839	-2.61804	1.04203	0.302908	0.517252	-5.29734	NOT	KCNN2	potassium calcium-activated channel subfamily N member 2 [Source:HGNC Symbol;Acc:HGNC:6291]
1339	ENSG00000080802	0.329797	5.52034	2.17742	0.0346768	0.160083	-4.32386	NOT	CNOT4	CCR4-NOT transcription complex subunit 4 [Source:HGNC Symbol;Acc:HGNC:7880]
1340	ENSG00000080815	0.21633	6.93974	2.18385	0.0341705	0.158979	-4.32661	NOT	PSEN1	presenilin 1 [Source:HGNC Symbol;Acc:HGNC:9508]
1341	ENSG00000080819	-0.215336	2.60074	-0.969656	0.337348	0.550581	-5.84342	NOT	CPOX	coproporphyrinogen oxidase [Source:HGNC Symbol;Acc:HGNC:2321]
1342	ENSG00000080822	-0.177607	6.81389	-1.09546	0.279085	0.493388	-6.00571	NOT	CLDND1	claudin domain containing 1 [Source:HGNC Symbol;Acc:HGNC:1322]
13906	ENSG00000204388	3.71365	0.951952	5.8537	4.98e-07	0.000572834	6.04855	UP	HSPA1B	heat shock protein family A (Hsp70) member 1B [Source:HGNC Symbol;Acc:HGNC:5233]
1344	ENSG00000080824	-0.00439888	8.39101	-0.0356954	0.971682	0.986278	-6.58689	NOT	HSP90AA1	heat shock protein 90 alpha family class A member 1 [Source:HGNC Symbol;Acc:HGNC:5253]
1345	ENSG00000080839	-0.0172178	4.42864	-0.139323	0.88981	0.948216	-6.50981	NOT	RBL1	RB transcriptional corepressor like 1 [Source:HGNC Symbol;Acc:HGNC:9893]
1346	ENSG00000080845	0.0935142	5.1899	0.785822	0.436048	0.640018	-6.26308	NOT	DLGAP4	DLG associated protein 4 [Source:HGNC Symbol;Acc:HGNC:24476]
1347	ENSG00000080854	-0.129337	2.5066	-0.485274	0.629812	0.789684	-6.17402	NOT	IGSF9B	immunoglobulin superfamily member 9B [Source:HGNC Symbol;Acc:HGNC:32326]
1348	ENSG00000080947	-0.243684	5.02808	-1.81092	0.0767618	0.23987	-4.97703	NOT	CROCCP3	CROCC pseudogene 3 [Source:HGNC Symbol;Acc:HGNC:29405]
1349	ENSG00000080986	0.278995	2.80403	1.48416	0.144667	0.338962	-5.26086	NOT	NDC80	NDC80 kinetochore complex component [Source:HGNC Symbol;Acc:HGNC:16909]
1350	ENSG00000081014	-0.107467	4.28621	-0.967193	0.338564	0.551637	-6.04424	NOT	AP4E1	adaptor related protein complex 4 subunit epsilon 1 [Source:HGNC Symbol;Acc:HGNC:573]
1351	ENSG00000081019	0.21082	5.29979	2.07899	0.0432877	0.177937	-4.50723	NOT	RSBN1	round spermatid basic protein 1 [Source:HGNC Symbol;Acc:HGNC:25642]
1352	ENSG00000081026	0.154341	1.63444	0.841151	0.404665	0.613501	-5.82655	NOT	MAGI3	membrane associated guanylate kinase, WW and PDZ domain containing 3 [Source:HGNC Symbol;Acc:HGNC:29647]
12909	ENSG00000188290	3.67284	2.97134	4.87216	1.38e-05	0.004545	3.07207	UP	HES4	hes family bHLH transcription factor 4 [Source:HGNC Symbol;Acc:HGNC:24149]
1354	ENSG00000081052	-0.267242	2.09657	-1.34303	0.185927	0.390155	-5.36658	NOT	COL4A4	collagen type IV alpha 4 chain [Source:HGNC Symbol;Acc:HGNC:2206]
1355	ENSG00000081059	-0.488685	8.24474	-1.78692	0.0806181	0.24615	-5.04182	NOT	TCF7	transcription factor 7 [Source:HGNC Symbol;Acc:HGNC:11639]
1356	ENSG00000081087	-0.181203	5.08577	-1.46696	0.14927	0.345798	-5.51253	NOT	OSTM1	osteoclastogenesis associated transmembrane protein 1 [Source:HGNC Symbol;Acc:HGNC:21652]
1357	ENSG00000081138	0.499589	-3.15226	1.28296	0.206007	0.414575	-5.0242	NOT	CDH7	cadherin 7 [Source:HGNC Symbol;Acc:HGNC:1766]
1358	ENSG00000081148	-0.528894	0.778111	-1.92147	0.0609535	0.212312	-4.3555	NOT	IMPG2	interphotoreceptor matrix proteoglycan 2 [Source:HGNC Symbol;Acc:HGNC:18362]
1359	ENSG00000081154	-0.0796899	6.73727	-0.731252	0.468377	0.666798	-6.33336	NOT	PCNP	PEST proteolytic signal containing nuclear protein [Source:HGNC Symbol;Acc:HGNC:30023]
1360	ENSG00000081177	-0.346648	0.250209	-1.14186	0.259488	0.47317	-5.39214	NOT	EXD2	exonuclease 3'-5' domain containing 2 [Source:HGNC Symbol;Acc:HGNC:20217]
1361	ENSG00000081181	0.114338	2.91766	0.779799	0.439549	0.642806	-6.04285	NOT	ARG2	arginase 2 [Source:HGNC Symbol;Acc:HGNC:664]
1362	ENSG00000081189	0.00888627	5.04003	0.0454885	0.963917	0.982981	-6.56198	NOT	MEF2C	myocyte enhancer factor 2C [Source:HGNC Symbol;Acc:HGNC:6996]
1363	ENSG00000081237	0.220801	10.3965	0.953529	0.345364	0.558239	-6.1032	NOT	PTPRC	protein tyrosine phosphatase receptor type C [Source:HGNC Symbol;Acc:HGNC:9666]
1364	ENSG00000081320	0.252649	9.04969	1.7387	0.0888548	0.25988	-5.11226	NOT	STK17B	serine/threonine kinase 17b [Source:HGNC Symbol;Acc:HGNC:11396]
1365	ENSG00000081377	0.079524	3.3404	0.533288	0.596431	0.764759	-6.25703	NOT	CDC14B	cell division cycle 14B [Source:HGNC Symbol;Acc:HGNC:1719]
1366	ENSG00000081386	-0.0195014	2.92257	-0.116255	0.907962	0.957593	-6.33767	NOT	ZNF510	zinc finger protein 510 [Source:HGNC Symbol;Acc:HGNC:29161]
1367	ENSG00000081479	-0.00681726	-2.8944	-0.0156212	0.987605	0.993792	-5.78445	NOT	LRP2	LDL receptor related protein 2 [Source:HGNC Symbol;Acc:HGNC:6694]
1368	ENSG00000081721	-0.392489	4.05777	-2.44438	0.018449	0.11851	-3.68588	NOT	DUSP12	dual specificity phosphatase 12 [Source:HGNC Symbol;Acc:HGNC:3067]
1369	ENSG00000081760	-0.224942	3.7062	-2.13047	0.0385751	0.16832	-4.29206	NOT	AACS	acetoacetyl-CoA synthetase [Source:HGNC Symbol;Acc:HGNC:21298]
1370	ENSG00000081791	-0.464155	6.46002	-3.55155	0.000904647	0.0368552	-1.02693	NOT	DELE1	DAP3 binding cell death enhancer 1 [Source:HGNC Symbol;Acc:HGNC:28969]
1371	ENSG00000081803	-0.18938	-2.09928	-0.360108	0.720433	0.849	-5.76591	NOT	CADPS2	calcium dependent secretion activator 2 [Source:HGNC Symbol;Acc:HGNC:16018]
1372	ENSG00000081870	-0.101833	4.71131	-1.05161	0.298536	0.513595	-5.99563	NOT	HSPB11	heat shock protein family B (small) member 11 [Source:HGNC Symbol;Acc:HGNC:25019]
1373	ENSG00000081913	0.680355	3.94756	2.81986	0.00709389	0.079395	-2.81444	NOT	PHLPP1	PH domain and leucine rich repeat protein phosphatase 1 [Source:HGNC Symbol;Acc:HGNC:20610]
1374	ENSG00000081923	-0.623555	1.87919	-2.60226	0.0124589	0.100254	-3.12071	NOT	ATP8B1	ATPase phospholipid transporting 8B1 [Source:HGNC Symbol;Acc:HGNC:3706]
1375	ENSG00000081985	0.285909	3.25051	1.12316	0.267263	0.481502	-5.76614	NOT	IL12RB2	interleukin 12 receptor subunit beta 2 [Source:HGNC Symbol;Acc:HGNC:5972]
1376	ENSG00000082014	-0.176906	6.01312	-1.36614	0.178615	0.381573	-5.67797	NOT	SMARCD3	SWI/SNF related, matrix associated, actin dependent regulator of chromatin, subfamily d, member 3 [Source:HGNC Symbol;Acc:HGNC:11108]
1377	ENSG00000082068	-0.111145	5.62458	-0.860061	0.394267	0.605179	-6.21898	NOT	WDR70	WD repeat domain 70 [Source:HGNC Symbol;Acc:HGNC:25495]
1378	ENSG00000082074	-0.288246	8.47233	-1.55239	0.127503	0.316434	-5.40903	NOT	FYB1	FYN binding protein 1 [Source:HGNC Symbol;Acc:HGNC:4036]
1379	ENSG00000082126	0.254695	-2.10256	0.823144	0.414722	0.621799	-5.51027	NOT	MPP4	membrane palmitoylated protein 4 [Source:HGNC Symbol;Acc:HGNC:13680]
1380	ENSG00000082146	0.229285	4.76669	0.579364	0.565203	0.741013	-6.37797	NOT	STRADB	STE20 related adaptor beta [Source:HGNC Symbol;Acc:HGNC:13205]
1381	ENSG00000082153	0.506462	7.25706	3.57093	0.000854001	0.036042	-0.973082	NOT	BZW1	basic leucine zipper and W2 domains 1 [Source:HGNC Symbol;Acc:HGNC:18380]
1382	ENSG00000082175	0.00747219	-3.55406	0.0190856	0.984856	0.992701	-5.75519	NOT	PGR	progesterone receptor [Source:HGNC Symbol;Acc:HGNC:8910]
1383	ENSG00000082212	-0.167827	5.93314	-1.33689	0.187909	0.393019	-5.71483	NOT	ME2	malic enzyme 2 [Source:HGNC Symbol;Acc:HGNC:6984]
1384	ENSG00000082213	-0.144234	3.34748	-1.1282	0.265152	0.479365	-5.77726	NOT	C5orf22	chromosome 5 open reading frame 22 [Source:HGNC Symbol;Acc:HGNC:25639]
1385	ENSG00000082258	0.118839	6.29708	0.855234	0.396906	0.606987	-6.2347	NOT	CCNT2	cyclin T2 [Source:HGNC Symbol;Acc:HGNC:1600]
1386	ENSG00000082269	-0.0952108	3.90366	-0.538459	0.592887	0.762336	-6.32328	NOT	FAM135A	family with sequence similarity 135 member A [Source:HGNC Symbol;Acc:HGNC:21084]
1387	ENSG00000082293	0.777981	2.79714	1.82488	0.0745921	0.236345	-4.7279	NOT	COL19A1	collagen type XIX alpha 1 chain [Source:HGNC Symbol;Acc:HGNC:2196]
1388	ENSG00000082397	-0.00677908	5.16857	-0.0306272	0.975701	0.988485	-6.56921	NOT	EPB41L3	erythrocyte membrane protein band 4.1 like 3 [Source:HGNC Symbol;Acc:HGNC:3380]
1389	ENSG00000082438	0.642835	3.35646	2.23216	0.0305733	0.150771	-4.04537	NOT	COBLL1	cordon-bleu WH2 repeat protein like 1 [Source:HGNC Symbol;Acc:HGNC:23571]
1390	ENSG00000082458	-0.0484868	3.64905	-0.278883	0.781599	0.88621	-6.39905	NOT	DLG3	discs large MAGUK scaffold protein 3 [Source:HGNC Symbol;Acc:HGNC:2902]
1391	ENSG00000082482	0.844684	-3.03146	1.99779	0.0517418	0.194916	-4.01162	NOT	KCNK2	potassium two pore domain channel subfamily K member 2 [Source:HGNC Symbol;Acc:HGNC:6277]
1392	ENSG00000082512	-0.241884	6.03417	-1.21911	0.22909	0.440211	-5.86188	NOT	TRAF5	TNF receptor associated factor 5 [Source:HGNC Symbol;Acc:HGNC:12035]
1393	ENSG00000082515	-0.0554976	4.34729	-0.461846	0.646394	0.800668	-6.40608	NOT	MRPL22	mitochondrial ribosomal protein L22 [Source:HGNC Symbol;Acc:HGNC:14480]
1394	ENSG00000082516	-0.0864794	2.80968	-0.548323	0.586152	0.756776	-6.18152	NOT	GEMIN5	gem nuclear organelle associated protein 5 [Source:HGNC Symbol;Acc:HGNC:20043]
1395	ENSG00000082641	-0.375759	5.78023	-2.68586	0.0100645	0.0909137	-3.23677	NOT	NFE2L1	nuclear factor, erythroid 2 like 1 [Source:HGNC Symbol;Acc:HGNC:7781]
1396	ENSG00000082684	-0.431626	-2.39456	-1.29212	0.202843	0.41068	-5.04894	NOT	SEMA5B	semaphorin 5B [Source:HGNC Symbol;Acc:HGNC:10737]
1397	ENSG00000082701	0.235692	6.47789	1.68985	0.0979018	0.273634	-5.21103	NOT	GSK3B	glycogen synthase kinase 3 beta [Source:HGNC Symbol;Acc:HGNC:4617]
1398	ENSG00000082781	-0.115944	3.31123	-0.409998	0.683733	0.825899	-6.31285	NOT	ITGB5	integrin subunit beta 5 [Source:HGNC Symbol;Acc:HGNC:6160]
1399	ENSG00000082805	0.128503	5.45227	0.83812	0.406348	0.615072	-6.23182	NOT	ERC1	ELKS/RAB6-interacting/CAST family member 1 [Source:HGNC Symbol;Acc:HGNC:17072]
1400	ENSG00000082898	-0.0246289	5.80776	-0.0990489	0.921535	0.964008	-6.5866	NOT	XPO1	exportin 1 [Source:HGNC Symbol;Acc:HGNC:12825]
1401	ENSG00000083067	0.412757	-1.04052	0.786798	0.435482	0.63946	-5.59544	NOT	TRPM3	transient receptor potential cation channel subfamily M member 3 [Source:HGNC Symbol;Acc:HGNC:17992]
1402	ENSG00000083093	-0.591271	1.75337	-2.3505	0.0231435	0.131831	-3.64413	NOT	PALB2	partner and localizer of BRCA2 [Source:HGNC Symbol;Acc:HGNC:26144]
1403	ENSG00000083097	0.161402	4.42502	0.61808	0.539606	0.72196	-6.32797	NOT	DOP1A	DOP1 leucine zipper like protein A [Source:HGNC Symbol;Acc:HGNC:21194]
1404	ENSG00000083099	0.0785031	3.79571	0.585937	0.560815	0.738051	-6.28332	NOT	LYRM2	LYR motif containing 2 [Source:HGNC Symbol;Acc:HGNC:25229]
1405	ENSG00000083123	-0.137473	3.25585	-0.808201	0.423183	0.628494	-6.06687	NOT	BCKDHB	branched chain keto acid dehydrogenase E1 subunit beta [Source:HGNC Symbol;Acc:HGNC:987]
1406	ENSG00000083168	0.421364	7.4032	2.54237	0.0144833	0.106995	-3.56958	NOT	KAT6A	lysine acetyltransferase 6A [Source:HGNC Symbol;Acc:HGNC:13013]
1407	ENSG00000083223	0.433525	7.49921	2.35873	0.0226931	0.130886	-3.96681	NOT	TUT7	terminal uridylyl transferase 7 [Source:HGNC Symbol;Acc:HGNC:25817]
1408	ENSG00000083290	-0.377523	4.86687	-2.14966	0.0369378	0.164927	-4.35078	NOT	ULK2	unc-51 like autophagy activating kinase 2 [Source:HGNC Symbol;Acc:HGNC:13480]
1409	ENSG00000083307	-0.15647	-1.32966	-0.492628	0.624645	0.78598	-5.75667	NOT	GRHL2	grainyhead like transcription factor 2 [Source:HGNC Symbol;Acc:HGNC:2799]
1410	ENSG00000083312	0.127763	5.99215	0.905805	0.369814	0.58221	-6.18717	NOT	TNPO1	transportin 1 [Source:HGNC Symbol;Acc:HGNC:6401]
1411	ENSG00000083444	-0.620765	5.37598	-2.98716	0.00452578	0.0660518	-2.49992	NOT	PLOD1	procollagen-lysine,2-oxoglutarate 5-dioxygenase 1 [Source:HGNC Symbol;Acc:HGNC:9081]
1412	ENSG00000083457	-0.10136	4.21047	-0.776417	0.441523	0.644766	-6.20049	NOT	ITGAE	integrin subunit alpha E [Source:HGNC Symbol;Acc:HGNC:6147]
1413	ENSG00000083520	0.0564162	5.11453	0.365376	0.716525	0.846941	-6.5001	NOT	DIS3	DIS3 homolog, exosome endoribonuclease and 3'-5' exoribonuclease [Source:HGNC Symbol;Acc:HGNC:20604]
1414	ENSG00000083535	0.0717447	4.39702	0.520944	0.604934	0.771452	-6.38084	NOT	PIBF1	progesterone immunomodulatory binding factor 1 [Source:HGNC Symbol;Acc:HGNC:23352]
1415	ENSG00000083544	-0.145651	4.61759	-1.22554	0.226682	0.438049	-5.79626	NOT	TDRD3	tudor domain containing 3 [Source:HGNC Symbol;Acc:HGNC:20612]
1416	ENSG00000083635	0.0676792	2.4258	0.406995	0.685921	0.827106	-6.19455	NOT	NUFIP1	nuclear FMR1 interacting protein 1 [Source:HGNC Symbol;Acc:HGNC:8057]
1417	ENSG00000083642	0.261984	5.6234	1.93798	0.0588496	0.208108	-4.77815	NOT	PDS5B	PDS5 cohesin associated factor B [Source:HGNC Symbol;Acc:HGNC:20418]
1418	ENSG00000083720	0.0559521	4.9258	0.373042	0.710851	0.842933	-6.48671	NOT	OXCT1	3-oxoacid CoA-transferase 1 [Source:HGNC Symbol;Acc:HGNC:8527]
1419	ENSG00000083750	-0.243019	4.19008	-1.70449	0.0951139	0.269035	-5.09204	NOT	RRAGB	Ras related GTP binding B [Source:HGNC Symbol;Acc:HGNC:19901]
15194	ENSG00000226780	-1.44424	-2.27567	-4.88191	1.33e-05	0.004545	2.9482	DOWN	AC244035.1	novel transcript
1421	ENSG00000083807	0.056009	1.50836	0.335046	0.739131	0.861369	-6.10025	NOT	SLC27A5	solute carrier family 27 member 5 [Source:HGNC Symbol;Acc:HGNC:10999]
1422	ENSG00000083812	0.351677	3.58149	2.29725	0.0262598	0.139742	-3.94246	NOT	ZNF324	zinc finger protein 324 [Source:HGNC Symbol;Acc:HGNC:14096]
1423	ENSG00000083817	-0.765686	0.466513	-3.47593	0.00113109	0.0405938	-0.904799	NOT	ZNF416	zinc finger protein 416 [Source:HGNC Symbol;Acc:HGNC:20645]
1424	ENSG00000083828	0.227451	5.2919	1.59481	0.117683	0.302184	-5.33478	NOT	ZNF586	zinc finger protein 586 [Source:HGNC Symbol;Acc:HGNC:25949]
1425	ENSG00000083838	-0.295369	2.82432	-2.33361	0.0240942	0.133712	-3.79107	NOT	ZNF446	zinc finger protein 446 [Source:HGNC Symbol;Acc:HGNC:21036]
1426	ENSG00000083844	-0.123443	5.01295	-1.15262	0.255091	0.46852	-5.90583	NOT	ZNF264	zinc finger protein 264 [Source:HGNC Symbol;Acc:HGNC:13057]
1427	ENSG00000083845	-0.537945	8.90992	-2.50436	0.0159188	0.111631	-3.63749	NOT	RPS5	ribosomal protein S5 [Source:HGNC Symbol;Acc:HGNC:10426]
1428	ENSG00000083857	0.428168	-2.63217	0.938365	0.353014	0.566315	-5.39064	NOT	FAT1	FAT atypical cadherin 1 [Source:HGNC Symbol;Acc:HGNC:3595]
1429	ENSG00000083896	0.727535	7.84397	3.41799	0.00134022	0.0423483	-1.39027	NOT	YTHDC1	YTH domain containing 1 [Source:HGNC Symbol;Acc:HGNC:30626]
1430	ENSG00000083937	0.494635	5.46683	2.72097	0.00919134	0.0877462	-3.14641	NOT	CHMP2B	charged multivesicular body protein 2B [Source:HGNC Symbol;Acc:HGNC:24537]
1431	ENSG00000084070	-0.09321	9.69489	-0.575893	0.567527	0.742677	-6.4015	NOT	SMAP2	small ArfGAP2 [Source:HGNC Symbol;Acc:HGNC:25082]
1432	ENSG00000084072	-0.509615	5.14245	-2.36091	0.022575	0.130451	-3.93559	NOT	PPIE	peptidylprolyl isomerase E [Source:HGNC Symbol;Acc:HGNC:9258]
1433	ENSG00000084073	-0.139268	4.51319	-1.32867	0.190586	0.396161	-5.66108	NOT	ZMPSTE24	zinc metallopeptidase STE24 [Source:HGNC Symbol;Acc:HGNC:12877]
1434	ENSG00000084090	-0.394358	6.34184	-2.68241	0.0101543	0.0911691	-3.25167	NOT	STARD7	StAR related lipid transfer domain containing 7 [Source:HGNC Symbol;Acc:HGNC:18063]
1435	ENSG00000084092	-0.293314	3.9646	-2.20426	0.0326075	0.155598	-4.17381	NOT	NOA1	nitric oxide associated 1 [Source:HGNC Symbol;Acc:HGNC:28473]
1436	ENSG00000084093	0.0056518	5.18541	0.0543867	0.956865	0.979943	-6.56898	NOT	REST	RE1 silencing transcription factor [Source:HGNC Symbol;Acc:HGNC:9966]
1437	ENSG00000084110	0.599667	4.90249	2.01474	0.0498677	0.191682	-4.60522	NOT	HAL	histidine ammonia-lyase [Source:HGNC Symbol;Acc:HGNC:4806]
1438	ENSG00000084112	0.241061	6.36648	1.99271	0.0523159	0.196073	-4.69066	NOT	SSH1	slingshot protein phosphatase 1 [Source:HGNC Symbol;Acc:HGNC:30579]
1439	ENSG00000084207	-0.56128	7.45295	-2.49329	0.0163607	0.112821	-3.67666	NOT	GSTP1	glutathione S-transferase pi 1 [Source:HGNC Symbol;Acc:HGNC:4638]
1440	ENSG00000084234	-0.194303	9.3044	-1.40232	0.167609	0.368273	-5.60916	NOT	APLP2	amyloid beta precursor like protein 2 [Source:HGNC Symbol;Acc:HGNC:598]
1441	ENSG00000084444	-0.131693	1.85866	-0.715453	0.477987	0.67412	-5.95357	NOT	FAM234B	family with sequence similarity 234 member B [Source:HGNC Symbol;Acc:HGNC:29288]
1442	ENSG00000084453	0.376204	-3.62931	0.983987	0.330328	0.543561	-5.31028	NOT	SLCO1A2	solute carrier organic anion transporter family member 1A2 [Source:HGNC Symbol;Acc:HGNC:10956]
1443	ENSG00000084463	0.145481	6.744	1.06198	0.293851	0.50883	-6.04143	NOT	WBP11	WW domain binding protein 11 [Source:HGNC Symbol;Acc:HGNC:16461]
1444	ENSG00000084623	-0.0419771	6.58443	-0.294775	0.769507	0.879435	-6.55643	NOT	EIF3I	eukaryotic translation initiation factor 3 subunit I [Source:HGNC Symbol;Acc:HGNC:3272]
1445	ENSG00000084628	0.599793	-2.54953	1.83004	0.0738041	0.23489	-4.30116	NOT	NKAIN1	sodium/potassium transporting ATPase interacting 1 [Source:HGNC Symbol;Acc:HGNC:25743]
1446	ENSG00000084652	-0.235508	5.21454	-1.68604	0.098638	0.274617	-5.19057	NOT	TXLNA	taxilin alpha [Source:HGNC Symbol;Acc:HGNC:30685]
1447	ENSG00000084676	0.163463	7.01901	0.989508	0.327651	0.540787	-6.11376	NOT	NCOA1	nuclear receptor coactivator 1 [Source:HGNC Symbol;Acc:HGNC:7668]
1448	ENSG00000084693	-0.0198351	4.52167	-0.208932	0.835434	0.917379	-6.50567	NOT	AGBL5	ATP/GTP binding protein like 5 [Source:HGNC Symbol;Acc:HGNC:26147]
1449	ENSG00000084710	-0.189522	-0.0582846	-0.622142	0.536956	0.719903	-5.79088	NOT	EFR3B	EFR3 homolog B [Source:HGNC Symbol;Acc:HGNC:29155]
1450	ENSG00000084731	-0.252639	2.53074	-1.45246	0.153238	0.35053	-5.27614	NOT	KIF3C	kinesin family member 3C [Source:HGNC Symbol;Acc:HGNC:6321]
1451	ENSG00000084733	0.0114786	6.77055	0.0939783	0.925539	0.965271	-6.59572	NOT	RAB10	RAB10, member RAS oncogene family [Source:HGNC Symbol;Acc:HGNC:9759]
1452	ENSG00000084754	-0.480341	7.24351	-3.11869	0.00314869	0.0578432	-2.18409	NOT	HADHA	hydroxyacyl-CoA dehydrogenase trifunctional multienzyme complex subunit alpha [Source:HGNC Symbol;Acc:HGNC:4801]
1453	ENSG00000084764	-0.128807	3.07776	-0.836812	0.407075	0.615735	-6.02113	NOT	MAPRE3	microtubule associated protein RP/EB family member 3 [Source:HGNC Symbol;Acc:HGNC:6892]
1454	ENSG00000084774	-0.440169	4.70555	-2.52743	0.0150328	0.109083	-3.55364	NOT	CAD	carbamoyl-phosphate synthetase 2, aspartate transcarbamylase, and dihydroorotase [Source:HGNC Symbol;Acc:HGNC:1424]
1455	ENSG00000085063	0.979588	-1.12858	2.36914	0.0221341	0.129785	-3.39285	NOT	CD59	CD59 molecule (CD59 blood group) [Source:HGNC Symbol;Acc:HGNC:1689]
3258	ENSG00000110203	3.66008	2.38261	3.27666	0.00201565	0.0489804	-1.48816	UP	FOLR3	folate receptor gamma [Source:HGNC Symbol;Acc:HGNC:3795]
1457	ENSG00000085185	0.0216713	3.74579	0.172754	0.863612	0.933043	-6.43358	NOT	BCORL1	BCL6 corepressor like 1 [Source:HGNC Symbol;Acc:HGNC:25657]
1458	ENSG00000085224	0.0434372	6.67581	0.348648	0.728963	0.85429	-6.53928	NOT	ATRX	ATRX chromatin remodeler [Source:HGNC Symbol;Acc:HGNC:886]
1459	ENSG00000085231	-0.0955074	2.83584	-0.62806	0.533107	0.717823	-6.13896	NOT	AK6	adenylate kinase 6 [Source:HGNC Symbol;Acc:HGNC:49151]
1460	ENSG00000085265	-0.574924	10.2892	-2.1909	0.0336232	0.157937	-4.27122	NOT	FCN1	ficolin 1 [Source:HGNC Symbol;Acc:HGNC:3623]
1461	ENSG00000085274	0.338247	4.10448	1.99347	0.052229	0.19589	-4.58445	NOT	MYNN	myoneurin [Source:HGNC Symbol;Acc:HGNC:14955]
1462	ENSG00000085276	0.709243	-0.983311	1.45359	0.152928	0.35026	-4.91429	NOT	MECOM	MDS1 and EVI1 complex locus [Source:HGNC Symbol;Acc:HGNC:3498]
1463	ENSG00000085365	0.0543627	4.36959	0.481546	0.632438	0.791483	-6.39821	NOT	SCAMP1	secretory carrier membrane protein 1 [Source:HGNC Symbol;Acc:HGNC:10563]
1464	ENSG00000085377	-0.325195	4.98523	-2.50322	0.0159637	0.111695	-3.623	NOT	PREP	prolyl endopeptidase [Source:HGNC Symbol;Acc:HGNC:9358]
1465	ENSG00000085382	-0.126583	3.4438	-0.744402	0.460463	0.660348	-6.13897	NOT	HACE1	HECT domain and ankyrin repeat containing E3 ubiquitin protein ligase 1 [Source:HGNC Symbol;Acc:HGNC:21033]
1466	ENSG00000085415	0.0868962	4.00445	0.35812	0.721911	0.850016	-6.41351	NOT	SEH1L	SEH1 like nucleoporin [Source:HGNC Symbol;Acc:HGNC:30379]
1467	ENSG00000085433	0.31026	4.17831	2.17284	0.0350411	0.160753	-4.25168	NOT	WDR47	WD repeat domain 47 [Source:HGNC Symbol;Acc:HGNC:29141]
1468	ENSG00000085465	0.0915886	3.35786	0.423431	0.673977	0.819443	-6.3111	NOT	OVGP1	oviductal glycoprotein 1 [Source:HGNC Symbol;Acc:HGNC:8524]
1469	ENSG00000085491	-0.278608	4.57394	-1.30517	0.198401	0.405677	-5.69567	NOT	SLC25A24	solute carrier family 25 member 24 [Source:HGNC Symbol;Acc:HGNC:20662]
1470	ENSG00000085511	-0.049105	5.68118	-0.322921	0.748235	0.866633	-6.53625	NOT	MAP3K4	mitogen-activated protein kinase kinase kinase 4 [Source:HGNC Symbol;Acc:HGNC:6856]
1471	ENSG00000085514	0.0364105	7.36394	0.213313	0.832037	0.915395	-6.5749	NOT	PILRA	paired immunoglobin like type 2 receptor alpha [Source:HGNC Symbol;Acc:HGNC:20396]
6185	ENSG00000136868	3.6203	1.4063	5.91267	4.07e-07	0.000495501	6.26726	UP	SLC31A1	solute carrier family 31 member 1 [Source:HGNC Symbol;Acc:HGNC:11016]
1473	ENSG00000085563	0.490455	4.26798	1.95532	0.0567069	0.204338	-4.66732	NOT	ABCB1	ATP binding cassette subfamily B member 1 [Source:HGNC Symbol;Acc:HGNC:40]
1474	ENSG00000085644	-0.323848	3.0488	-1.8303	0.0737642	0.234799	-4.76158	NOT	ZNF213	zinc finger protein 213 [Source:HGNC Symbol;Acc:HGNC:13005]
1475	ENSG00000085662	-0.395541	5.40845	-2.82044	0.00708308	0.079395	-2.90988	NOT	AKR1B1	aldo-keto reductase family 1 member B [Source:HGNC Symbol;Acc:HGNC:381]
1476	ENSG00000085719	0.354374	3.33461	1.5857	0.119738	0.304892	-5.1783	NOT	CPNE3	copine 3 [Source:HGNC Symbol;Acc:HGNC:2316]
1477	ENSG00000085733	0.090433	3.23483	0.296617	0.768109	0.878678	-6.3408	NOT	CTTN	cortactin [Source:HGNC Symbol;Acc:HGNC:3338]
1478	ENSG00000085741	-0.285317	-0.527518	-1.06233	0.293696	0.50869	-5.40224	NOT	WNT11	Wnt family member 11 [Source:HGNC Symbol;Acc:HGNC:12776]
1479	ENSG00000085760	-0.149074	4.6215	-1.39142	0.170868	0.372513	-5.58739	NOT	MTIF2	mitochondrial translational initiation factor 2 [Source:HGNC Symbol;Acc:HGNC:7441]
1480	ENSG00000085788	-0.191959	5.32568	-1.39748	0.169051	0.369794	-5.6184	NOT	DDHD2	DDHD domain containing 2 [Source:HGNC Symbol;Acc:HGNC:29106]
1481	ENSG00000085831	0.718426	0.710949	2.06307	0.0448431	0.181458	-4.08795	NOT	TTC39A	tetratricopeptide repeat domain 39A [Source:HGNC Symbol;Acc:HGNC:18657]
1482	ENSG00000085832	0.204086	7.04199	1.20952	0.232714	0.443757	-5.87741	NOT	EPS15	epidermal growth factor receptor pathway substrate 15 [Source:HGNC Symbol;Acc:HGNC:3419]
1483	ENSG00000085840	0.152489	1.3749	0.772918	0.44357	0.646163	-5.8479	NOT	ORC1	origin recognition complex subunit 1 [Source:HGNC Symbol;Acc:HGNC:8487]
1484	ENSG00000085871	-0.0863087	3.6456	-0.469095	0.641243	0.797144	-6.32802	NOT	MGST2	microsomal glutathione S-transferase 2 [Source:HGNC Symbol;Acc:HGNC:7063]
1485	ENSG00000085978	-0.0695457	6.48384	-0.500992	0.618793	0.781059	-6.47405	NOT	ATG16L1	autophagy related 16 like 1 [Source:HGNC Symbol;Acc:HGNC:21498]
1486	ENSG00000085982	-0.28413	4.53811	-2.49363	0.016347	0.112764	-3.61742	NOT	USP40	ubiquitin specific peptidase 40 [Source:HGNC Symbol;Acc:HGNC:20069]
1487	ENSG00000085998	-0.513909	4.49011	-2.86172	0.00634755	0.0760661	-2.7649	NOT	POMGNT1	protein O-linked mannose N-acetylglucosaminyltransferase 1 (beta 1,2-) [Source:HGNC Symbol;Acc:HGNC:19139]
1488	ENSG00000085999	-0.10752	-0.492394	-0.511496	0.611479	0.776296	-5.80913	NOT	RAD54L	RAD54 like [Source:HGNC Symbol;Acc:HGNC:9826]
1489	ENSG00000086015	0.0121567	4.41589	0.126059	0.900241	0.953167	-6.51027	NOT	MAST2	microtubule associated serine/threonine kinase 2 [Source:HGNC Symbol;Acc:HGNC:19035]
1490	ENSG00000086061	0.524407	7.02718	2.61147	0.0121717	0.0994251	-3.41584	NOT	DNAJA1	DnaJ heat shock protein family (Hsp40) member A1 [Source:HGNC Symbol;Acc:HGNC:5229]
1491	ENSG00000086062	0.467083	7.86816	2.87711	0.00609202	0.0744863	-2.78536	NOT	B4GALT1	beta-1,4-galactosyltransferase 1 [Source:HGNC Symbol;Acc:HGNC:924]
1492	ENSG00000086065	0.0947719	4.93579	0.73774	0.464463	0.663537	-6.28577	NOT	CHMP5	charged multivesicular body protein 5 [Source:HGNC Symbol;Acc:HGNC:26942]
1493	ENSG00000086102	0.150978	5.97057	1.26753	0.211419	0.420577	-5.80288	NOT	NFX1	nuclear transcription factor, X-box binding 1 [Source:HGNC Symbol;Acc:HGNC:7803]
1494	ENSG00000086200	0.368526	3.09013	2.1144	0.0399953	0.17154	-4.24903	NOT	IPO11	importin 11 [Source:HGNC Symbol;Acc:HGNC:20628]
1495	ENSG00000086232	-0.443451	6.65057	-2.82796	0.00694332	0.0790998	-2.90884	NOT	EIF2AK1	eukaryotic translation initiation factor 2 alpha kinase 1 [Source:HGNC Symbol;Acc:HGNC:24921]
1496	ENSG00000086289	0.380215	2.40903	1.34113	0.186537	0.391034	-5.40029	NOT	EPDR1	ependymin related 1 [Source:HGNC Symbol;Acc:HGNC:17572]
1497	ENSG00000086300	0.392313	4.82232	1.22161	0.22815	0.439358	-5.81236	NOT	SNX10	sorting nexin 10 [Source:HGNC Symbol;Acc:HGNC:14974]
1498	ENSG00000086475	-0.282366	4.3854	-2.21992	0.0314514	0.152714	-4.17942	NOT	SEPHS1	selenophosphate synthetase 1 [Source:HGNC Symbol;Acc:HGNC:19685]
1499	ENSG00000086504	-0.0998364	5.32795	-0.456646	0.650099	0.803075	-6.47248	NOT	MRPL28	mitochondrial ribosomal protein L28 [Source:HGNC Symbol;Acc:HGNC:14484]
1500	ENSG00000086506	0.604669	1.22854	0.800713	0.427462	0.631847	-5.80445	NOT	HBQ1	hemoglobin subunit theta 1 [Source:HGNC Symbol;Acc:HGNC:4833]
1501	ENSG00000086544	0.10081	3.40579	0.615897	0.541033	0.723449	-6.21788	NOT	ITPKC	inositol-trisphosphate 3-kinase C [Source:HGNC Symbol;Acc:HGNC:14897]
1502	ENSG00000086570	-0.506698	1.68129	-1.82917	0.0739366	0.235131	-4.60475	NOT	FAT2	FAT atypical cadherin 2 [Source:HGNC Symbol;Acc:HGNC:3596]
1503	ENSG00000086589	0.108317	6.27454	0.965267	0.339517	0.552408	-6.13585	NOT	RBM22	RNA binding motif protein 22 [Source:HGNC Symbol;Acc:HGNC:25503]
1504	ENSG00000086598	-0.0868551	6.38116	-0.949181	0.347546	0.56044	-6.15159	NOT	TMED2	transmembrane p24 trafficking protein 2 [Source:HGNC Symbol;Acc:HGNC:16996]
1505	ENSG00000086619	0.665761	4.39457	2.96127	0.00485607	0.0676248	-2.50866	NOT	ERO1B	endoplasmic reticulum oxidoreductase 1 beta [Source:HGNC Symbol;Acc:HGNC:14355]
1506	ENSG00000086666	0.728616	7.16087	3.2575	0.00212889	0.0499655	-1.82387	NOT	ZFAND6	zinc finger AN1-type containing 6 [Source:HGNC Symbol;Acc:HGNC:30164]
1507	ENSG00000086712	0.462433	3.77134	1.91586	0.0616829	0.213544	-4.6889	NOT	TXLNG	taxilin gamma [Source:HGNC Symbol;Acc:HGNC:18578]
1508	ENSG00000086717	0.0891616	0.100286	0.458921	0.648477	0.802205	-5.88818	NOT	PPEF1	protein phosphatase with EF-hand domain 1 [Source:HGNC Symbol;Acc:HGNC:9243]
1509	ENSG00000086730	-0.115227	7.11557	-0.632002	0.53055	0.715759	-6.39947	NOT	LAT2	linker for activation of T cells family member 2 [Source:HGNC Symbol;Acc:HGNC:12749]
1510	ENSG00000086758	-0.0505531	7.53984	-0.319458	0.750842	0.867987	-6.54517	NOT	HUWE1	HECT, UBA and WWE domain containing E3 ubiquitin protein ligase 1 [Source:HGNC Symbol;Acc:HGNC:30892]
1511	ENSG00000086827	-0.119523	2.58895	-0.783711	0.437273	0.640954	-5.99898	NOT	ZW10	zw10 kinetochore protein [Source:HGNC Symbol;Acc:HGNC:13194]
1512	ENSG00000086848	-0.246797	1.55568	-1.29968	0.200261	0.407682	-5.35485	NOT	ALG9	ALG9 alpha-1,2-mannosyltransferase [Source:HGNC Symbol;Acc:HGNC:15672]
1513	ENSG00000086967	0.0349559	1.0275	0.0963433	0.923671	0.964554	-6.09127	NOT	MYBPC2	myosin binding protein C2 [Source:HGNC Symbol;Acc:HGNC:7550]
1514	ENSG00000086991	0.0492316	-3.14511	0.112927	0.910585	0.95875	-5.76651	NOT	NOX4	NADPH oxidase 4 [Source:HGNC Symbol;Acc:HGNC:7891]
1515	ENSG00000087008	0.0121477	4.08918	0.150104	0.881347	0.942495	-6.47542	NOT	ACOX3	acyl-CoA oxidase 3, pristanoyl [Source:HGNC Symbol;Acc:HGNC:121]
1516	ENSG00000087053	0.0648898	3.65831	0.458192	0.648997	0.802444	-6.33356	NOT	MTMR2	myotubularin related protein 2 [Source:HGNC Symbol;Acc:HGNC:7450]
1517	ENSG00000087074	0.97801	8.9785	2.55173	0.0141482	0.106054	-3.53351	NOT	PPP1R15A	protein phosphatase 1 regulatory subunit 15A [Source:HGNC Symbol;Acc:HGNC:14375]
1518	ENSG00000087076	-0.0690165	-0.842381	-0.212994	0.832284	0.915472	-5.88209	NOT	HSD17B14	hydroxysteroid 17-beta dehydrogenase 14 [Source:HGNC Symbol;Acc:HGNC:23238]
1519	ENSG00000087077	-0.199525	3.20805	-1.07585	0.28767	0.502455	-5.81602	NOT	TRIP6	thyroid hormone receptor interactor 6 [Source:HGNC Symbol;Acc:HGNC:12311]
1520	ENSG00000087085	0.256704	-1.86512	0.469566	0.640909	0.796935	-5.7344	NOT	ACHE	acetylcholinesterase (Cartwright blood group) [Source:HGNC Symbol;Acc:HGNC:108]
1521	ENSG00000087086	-0.0360871	11.338	-0.261631	0.794787	0.894394	-6.49853	NOT	FTL	ferritin light chain [Source:HGNC Symbol;Acc:HGNC:3999]
1522	ENSG00000087087	-0.156021	7.54405	-0.998957	0.323102	0.536699	-6.10103	NOT	SRRT	serrate, RNA effector molecule [Source:HGNC Symbol;Acc:HGNC:24101]
1523	ENSG00000087088	-0.436936	6.39069	-2.32455	0.0246184	0.135173	-4.03948	NOT	BAX	BCL2 associated X, apoptosis regulator [Source:HGNC Symbol;Acc:HGNC:959]
1524	ENSG00000087095	0.101436	4.83842	0.779393	0.439786	0.64292	-6.24835	NOT	NLK	nemo like kinase [Source:HGNC Symbol;Acc:HGNC:29858]
1525	ENSG00000087116	-0.506895	-0.691422	-1.05666	0.296248	0.511062	-5.39682	NOT	ADAMTS2	ADAM metallopeptidase with thrombospondin type 1 motif 2 [Source:HGNC Symbol;Acc:HGNC:218]
1526	ENSG00000087128	0.530402	-3.04831	2.02118	0.0491716	0.190418	-3.97231	NOT	TMPRSS11E	transmembrane serine protease 11E [Source:HGNC Symbol;Acc:HGNC:24465]
1527	ENSG00000087152	-0.189055	6.79371	-1.88676	0.0655865	0.22063	-4.88144	NOT	ATXN7L3	ataxin 7 like 3 [Source:HGNC Symbol;Acc:HGNC:25416]
1528	ENSG00000087157	0.320136	6.9249	1.85189	0.0705407	0.228892	-4.9423	NOT	PGS1	phosphatidylglycerophosphate synthase 1 [Source:HGNC Symbol;Acc:HGNC:30029]
1529	ENSG00000087191	-0.455765	5.63078	-2.18388	0.034168	0.158979	-4.31392	NOT	PSMC5	proteasome 26S subunit, ATPase 5 [Source:HGNC Symbol;Acc:HGNC:9552]
1530	ENSG00000087206	0.515072	6.25475	3.39458	0.00143474	0.0429013	-1.45651	NOT	UIMC1	ubiquitin interaction motif containing 1 [Source:HGNC Symbol;Acc:HGNC:30298]
1531	ENSG00000087237	0.203425	2.21802	0.66686	0.508231	0.698611	-6.02972	NOT	CETP	cholesteryl ester transfer protein [Source:HGNC Symbol;Acc:HGNC:1869]
1532	ENSG00000087245	0.45487	-2.3927	1.28127	0.206595	0.415194	-5.05782	NOT	MMP2	matrix metallopeptidase 2 [Source:HGNC Symbol;Acc:HGNC:7166]
1533	ENSG00000087253	0.210025	5.7592	1.1837	0.242682	0.455496	-5.89829	NOT	LPCAT2	lysophosphatidylcholine acyltransferase 2 [Source:HGNC Symbol;Acc:HGNC:26032]
1534	ENSG00000087258	-0.317469	2.33472	-1.55119	0.12779	0.316684	-5.11305	NOT	GNAO1	G protein subunit alpha o1 [Source:HGNC Symbol;Acc:HGNC:4389]
1535	ENSG00000087263	-0.306467	0.893417	-1.16337	0.250746	0.463718	-5.43668	NOT	OGFOD1	2-oxoglutarate and iron dependent oxygenase domain containing 1 [Source:HGNC Symbol;Acc:HGNC:25585]
1536	ENSG00000087266	-0.00576162	8.94853	-0.0454894	0.963916	0.982981	-6.57874	NOT	SH3BP2	SH3 domain binding protein 2 [Source:HGNC Symbol;Acc:HGNC:10825]
1537	ENSG00000087269	0.0776531	0.917609	0.247831	0.805381	0.900738	-6.05208	NOT	NOP14	NOP14 nucleolar protein [Source:HGNC Symbol;Acc:HGNC:16821]
1538	ENSG00000087274	-0.398634	8.24078	-3.12378	0.00310434	0.0575496	-2.16371	NOT	ADD1	adducin 1 [Source:HGNC Symbol;Acc:HGNC:243]
1539	ENSG00000087299	-0.167344	2.29439	-0.900945	0.372364	0.584512	-5.86519	NOT	L2HGDH	L-2-hydroxyglutarate dehydrogenase [Source:HGNC Symbol;Acc:HGNC:20499]
1540	ENSG00000087301	0.482505	4.24654	2.41004	0.0200559	0.123495	-3.77031	NOT	TXNDC16	thioredoxin domain containing 16 [Source:HGNC Symbol;Acc:HGNC:19965]
1541	ENSG00000087302	-0.0739582	5.79959	-0.626962	0.533819	0.718237	-6.39502	NOT	RTRAF	RNA transcription, translation and transport factor [Source:HGNC Symbol;Acc:HGNC:23169]
1542	ENSG00000087303	-0.119172	1.19186	-0.672192	0.504863	0.69592	-5.89831	NOT	NID2	nidogen 2 [Source:HGNC Symbol;Acc:HGNC:13389]
1543	ENSG00000087338	0.134557	5.17166	1.28653	0.204771	0.41309	-5.75503	NOT	GMCL1	germ cell-less 1, spermatogenesis associated [Source:HGNC Symbol;Acc:HGNC:23843]
1544	ENSG00000087365	-0.360017	7.50162	-2.78633	0.0077494	0.0819719	-3.0058	NOT	SF3B2	splicing factor 3b subunit 2 [Source:HGNC Symbol;Acc:HGNC:10769]
1545	ENSG00000087448	-0.359745	3.75177	-2.27082	0.0279413	0.144468	-4.01963	NOT	KLHL42	kelch like family member 42 [Source:HGNC Symbol;Acc:HGNC:29252]
1546	ENSG00000087460	-0.301894	9.51006	-2.20724	0.032385	0.155056	-4.25287	NOT	GNAS	GNAS complex locus [Source:HGNC Symbol;Acc:HGNC:4392]
1547	ENSG00000087470	0.143396	3.69297	0.69558	0.490232	0.684536	-6.20148	NOT	DNM1L	dynamin 1 like [Source:HGNC Symbol;Acc:HGNC:2973]
1548	ENSG00000087495	0.202306	-1.06546	0.734644	0.466328	0.665192	-5.63219	NOT	PHACTR3	phosphatase and actin regulator 3 [Source:HGNC Symbol;Acc:HGNC:15833]
1549	ENSG00000087502	0.566458	3.72351	3.02786	0.00404867	0.0634619	-2.2879	NOT	ERGIC2	ERGIC and golgi 2 [Source:HGNC Symbol;Acc:HGNC:30208]
1550	ENSG00000087586	-0.0490605	0.405391	-0.2026	0.840351	0.919881	-6.00354	NOT	AURKA	aurora kinase A [Source:HGNC Symbol;Acc:HGNC:11393]
1551	ENSG00000087589	0.417654	4.20874	1.69729	0.0964776	0.271105	-5.10087	NOT	CASS4	Cas scaffold protein family member 4 [Source:HGNC Symbol;Acc:HGNC:15878]
1552	ENSG00000087842	-0.104074	-3.18174	-0.267993	0.789917	0.891345	-5.73855	NOT	PIR	pirin [Source:HGNC Symbol;Acc:HGNC:30048]
1553	ENSG00000087884	-0.329616	2.12724	-1.91565	0.0617105	0.213544	-4.50683	NOT	AAMDC	adipogenesis associated Mth938 domain containing [Source:HGNC Symbol;Acc:HGNC:30205]
13194	ENSG00000196549	3.53091	2.46332	3.89899	0.00031565	0.0230474	0.192461	UP	MME	membrane metalloendopeptidase [Source:HGNC Symbol;Acc:HGNC:7154]
1555	ENSG00000087995	-0.223993	2.67911	-1.83705	0.0727432	0.233125	-4.70561	NOT	METTL2A	methyltransferase like 2A [Source:HGNC Symbol;Acc:HGNC:25755]
1556	ENSG00000088002	-0.82074	0.241554	-2.98711	0.0045264	0.0660518	-2.11572	NOT	SULT2B1	sulfotransferase family 2B member 1 [Source:HGNC Symbol;Acc:HGNC:11459]
1557	ENSG00000088035	-0.208209	4.45188	-1.67406	0.100984	0.277827	-5.1628	NOT	ALG6	ALG6 alpha-1,3-glucosyltransferase [Source:HGNC Symbol;Acc:HGNC:23157]
1558	ENSG00000088038	-0.156988	5.79058	-1.20852	0.233093	0.444194	-5.87022	NOT	CNOT3	CCR4-NOT transcription complex subunit 3 [Source:HGNC Symbol;Acc:HGNC:7879]
1559	ENSG00000088179	-0.24659	6.11923	-1.66286	0.10322	0.280771	-5.2506	NOT	PTPN4	protein tyrosine phosphatase non-receptor type 4 [Source:HGNC Symbol;Acc:HGNC:9656]
1560	ENSG00000088205	-0.128223	5.70904	-0.92776	0.358431	0.571602	-6.16155	NOT	DDX18	DEAD-box helicase 18 [Source:HGNC Symbol;Acc:HGNC:2741]
1561	ENSG00000088247	-0.42575	6.8912	-3.20688	0.00245791	0.0523213	-1.95686	NOT	KHSRP	KH-type splicing regulatory protein [Source:HGNC Symbol;Acc:HGNC:6316]
1562	ENSG00000088256	-0.132865	2.25475	-0.700563	0.487145	0.68211	-6.01487	NOT	GNA11	G protein subunit alpha 11 [Source:HGNC Symbol;Acc:HGNC:4379]
1563	ENSG00000088280	-0.0901463	0.540461	-0.438949	0.662777	0.811196	-5.9466	NOT	ASAP3	ArfGAP with SH3 domain, ankyrin repeat and PH domain 3 [Source:HGNC Symbol;Acc:HGNC:14987]
1564	ENSG00000088298	-0.191911	5.85027	-1.91113	0.0623035	0.214425	-4.83139	NOT	EDEM2	ER degradation enhancing alpha-mannosidase like protein 2 [Source:HGNC Symbol;Acc:HGNC:15877]
1565	ENSG00000088305	-0.264526	0.290322	-1.44225	0.156086	0.353952	-5.03606	NOT	DNMT3B	DNA methyltransferase 3 beta [Source:HGNC Symbol;Acc:HGNC:2979]
1566	ENSG00000088325	0.0179348	1.30074	0.0795745	0.936925	0.970883	-6.12585	NOT	TPX2	TPX2 microtubule nucleation factor [Source:HGNC Symbol;Acc:HGNC:1249]
1567	ENSG00000088340	-0.432468	-0.722723	-1.6626	0.103271	0.280838	-4.64604	NOT	FER1L4	fer-1 like family member 4 (pseudogene) [Source:HGNC Symbol;Acc:HGNC:15801]
1568	ENSG00000088356	-0.157648	3.66381	-0.932875	0.355812	0.569046	-6.01088	NOT	PDRG1	p53 and DNA damage regulated 1 [Source:HGNC Symbol;Acc:HGNC:16119]
1569	ENSG00000088367	-0.126717	-1.78926	-0.373131	0.710785	0.842903	-5.77838	NOT	EPB41L1	erythrocyte membrane protein band 4.1 like 1 [Source:HGNC Symbol;Acc:HGNC:3378]
1570	ENSG00000088386	0.651263	-3.70186	1.76507	0.0842676	0.252049	-4.36583	NOT	SLC15A1	solute carrier family 15 member 1 [Source:HGNC Symbol;Acc:HGNC:10920]
1571	ENSG00000088387	-0.128907	5.57784	-0.699372	0.487882	0.682501	-6.34157	NOT	DOCK9	dedicator of cytokinesis 9 [Source:HGNC Symbol;Acc:HGNC:14132]
1572	ENSG00000088448	-0.130606	7.37274	-1.38006	0.174315	0.376766	-5.66178	NOT	ANKRD10	ankyrin repeat domain 10 [Source:HGNC Symbol;Acc:HGNC:20265]
1573	ENSG00000088451	-0.254465	3.16007	-1.51922	0.135631	0.327225	-5.26075	NOT	TGDS	TDP-glucose 4,6-dehydratase [Source:HGNC Symbol;Acc:HGNC:20324]
1574	ENSG00000088538	0.145133	2.84933	0.759095	0.451713	0.653476	-6.04863	NOT	DOCK3	dedicator of cytokinesis 3 [Source:HGNC Symbol;Acc:HGNC:2989]
1575	ENSG00000088543	-0.580855	3.14391	-2.46116	0.0177066	0.116297	-3.55883	NOT	C3orf18	chromosome 3 open reading frame 18 [Source:HGNC Symbol;Acc:HGNC:24837]
1576	ENSG00000088682	-0.558861	3.73417	-2.13067	0.0385575	0.16832	-4.29493	NOT	COQ9	coenzyme Q9 [Source:HGNC Symbol;Acc:HGNC:25302]
1577	ENSG00000088726	-0.0107825	2.39235	-0.0298178	0.976343	0.988576	-6.27255	NOT	TMEM40	transmembrane protein 40 [Source:HGNC Symbol;Acc:HGNC:25620]
1578	ENSG00000088727	0.315191	1.59994	1.48597	0.144188	0.338245	-5.11103	NOT	KIF9	kinesin family member 9 [Source:HGNC Symbol;Acc:HGNC:16666]
1579	ENSG00000088756	0.773182	-3.24079	1.67623	0.100557	0.277537	-4.51017	NOT	ARHGAP28	Rho GTPase activating protein 28 [Source:HGNC Symbol;Acc:HGNC:25509]
1580	ENSG00000088766	-0.429856	-3.28109	-1.23753	0.222243	0.432471	-5.07405	NOT	CRLS1	cardiolipin synthase 1 [Source:HGNC Symbol;Acc:HGNC:16148]
1581	ENSG00000088808	-0.0995873	4.09846	-0.919935	0.362461	0.575317	-6.06978	NOT	PPP1R13B	protein phosphatase 1 regulatory subunit 13B [Source:HGNC Symbol;Acc:HGNC:14950]
1582	ENSG00000088812	-0.516741	5.25923	-2.75001	0.00852259	0.0848688	-3.07179	NOT	ATRN	attractin [Source:HGNC Symbol;Acc:HGNC:885]
1583	ENSG00000088826	0.274413	4.21173	0.808308	0.423122	0.628494	-6.17307	NOT	SMOX	spermine oxidase [Source:HGNC Symbol;Acc:HGNC:15862]
1584	ENSG00000088827	-1.18566	4.64037	-1.65867	0.104065	0.282256	-5.19101	NOT	SIGLEC1	sialic acid binding Ig like lectin 1 [Source:HGNC Symbol;Acc:HGNC:11127]
1585	ENSG00000088833	-0.183867	6.03371	-1.15184	0.255407	0.468782	-5.93958	NOT	NSFL1C	NSFL1 cofactor [Source:HGNC Symbol;Acc:HGNC:15912]
1586	ENSG00000088836	-0.686059	-0.822654	-2.34547	0.023423	0.132724	-3.45936	NOT	SLC4A11	solute carrier family 4 member 11 [Source:HGNC Symbol;Acc:HGNC:16438]
1587	ENSG00000088854	-0.216939	5.17423	-1.50366	0.139584	0.332506	-5.46459	NOT	C20orf194	chromosome 20 open reading frame 194 [Source:HGNC Symbol;Acc:HGNC:17721]
1588	ENSG00000088881	-0.039396	2.97977	-0.193268	0.847609	0.923887	-6.33369	NOT	EBF4	EBF family member 4 [Source:HGNC Symbol;Acc:HGNC:29278]
1589	ENSG00000088882	-0.247022	-0.365594	-0.666063	0.508736	0.698888	-5.73593	NOT	CPXM1	carboxypeptidase X, M14 family member 1 [Source:HGNC Symbol;Acc:HGNC:15771]
1590	ENSG00000088888	-0.615374	6.80646	-2.77008	0.00808697	0.0833722	-3.04668	NOT	MAVS	mitochondrial antiviral signaling protein [Source:HGNC Symbol;Acc:HGNC:29233]
1591	ENSG00000088899	0.476614	3.45852	1.39012	0.17126	0.373014	-5.46774	NOT	LZTS3	leucine zipper tumor suppressor family member 3 [Source:HGNC Symbol;Acc:HGNC:30139]
1592	ENSG00000088930	-0.0598982	7.18358	-0.494155	0.623575	0.785134	-6.47653	NOT	XRN2	5'-3' exoribonuclease 2 [Source:HGNC Symbol;Acc:HGNC:12836]
1593	ENSG00000088970	-0.0158524	4.96579	-0.158604	0.874683	0.938813	-6.54627	NOT	KIZ	kizuna centrosomal protein [Source:HGNC Symbol;Acc:HGNC:15865]
1594	ENSG00000088986	-0.164618	4.94417	-0.785418	0.436282	0.640209	-6.25086	NOT	DYNLL1	dynein light chain LC8-type 1 [Source:HGNC Symbol;Acc:HGNC:15476]
1595	ENSG00000088992	-0.194716	5.12228	-0.789994	0.433632	0.637828	-6.25683	NOT	TESC	tescalcin [Source:HGNC Symbol;Acc:HGNC:26065]
1596	ENSG00000089006	-0.34826	5.97064	-2.85841	0.00640391	0.0762654	-2.83091	NOT	SNX5	sorting nexin 5 [Source:HGNC Symbol;Acc:HGNC:14969]
1597	ENSG00000089009	-0.568494	9.86219	-2.79787	0.00751773	0.0812213	-2.94999	NOT	RPL6	ribosomal protein L6 [Source:HGNC Symbol;Acc:HGNC:10362]
1598	ENSG00000089012	-0.490661	2.79189	-1.94	0.0585962	0.207774	-4.54249	NOT	SIRPG	signal regulatory protein gamma [Source:HGNC Symbol;Acc:HGNC:15757]
1599	ENSG00000089022	-0.233389	5.4542	-2.38325	0.0213963	0.127553	-3.90098	NOT	MAPKAPK5	MAPK activated protein kinase 5 [Source:HGNC Symbol;Acc:HGNC:6889]
1600	ENSG00000089041	-0.111501	3.19282	-0.452503	0.653058	0.80489	-6.27941	NOT	P2RX7	purinergic receptor P2X 7 [Source:HGNC Symbol;Acc:HGNC:8537]
1601	ENSG00000089048	-0.0409778	3.2209	-0.254959	0.799904	0.897726	-6.35186	NOT	ESF1	ESF1 nucleolar pre-rRNA processing protein homolog [Source:HGNC Symbol;Acc:HGNC:15898]
1602	ENSG00000089050	-0.413575	2.20837	-1.9581	0.0563706	0.203995	-4.44224	NOT	RBBP9	RB binding protein 9, serine hydrolase [Source:HGNC Symbol;Acc:HGNC:9892]
1603	ENSG00000089053	-0.569869	7.11623	-3.65419	0.000665736	0.0324137	-0.739349	NOT	ANAPC5	anaphase promoting complex subunit 5 [Source:HGNC Symbol;Acc:HGNC:15713]
1604	ENSG00000089057	0.217399	6.19182	1.59917	0.116709	0.300764	-5.35008	NOT	SLC23A2	solute carrier family 23 member 2 [Source:HGNC Symbol;Acc:HGNC:10973]
1605	ENSG00000089060	-0.183121	6.22188	-1.58538	0.11981	0.304964	-5.37098	NOT	SLC8B1	solute carrier family 8 member B1 [Source:HGNC Symbol;Acc:HGNC:26175]
1606	ENSG00000089063	-0.252466	5.76146	-2.01135	0.0502376	0.192248	-4.648	NOT	TMEM230	transmembrane protein 230 [Source:HGNC Symbol;Acc:HGNC:15876]
1607	ENSG00000089091	0.0130392	2.50995	0.0889504	0.929512	0.967169	-6.2847	NOT	DZANK1	double zinc ribbon and ankyrin repeat domains 1 [Source:HGNC Symbol;Acc:HGNC:15858]
1608	ENSG00000089094	-0.190765	6.33995	-1.47302	0.147634	0.343007	-5.53571	NOT	KDM2B	lysine demethylase 2B [Source:HGNC Symbol;Acc:HGNC:13610]
18470	ENSG00000260467	3.6124	0.856487	3.19275	0.00255806	0.0532313	-1.62059	UP	AC018552.2	novel transcript, antisense to CCDC135 and GPR97
1610	ENSG00000089123	0.147608	3.61341	0.801723	0.426883	0.631312	-6.11358	NOT	TASP1	taspase 1 [Source:HGNC Symbol;Acc:HGNC:15859]
1611	ENSG00000089127	-0.560551	2.39933	-1.52452	0.134303	0.325349	-5.16137	NOT	OAS1	2'-5'-oligoadenylate synthetase 1 [Source:HGNC Symbol;Acc:HGNC:8086]
1612	ENSG00000089154	-0.259688	6.86733	-1.60549	0.11531	0.298755	-5.34233	NOT	GCN1	GCN1 activator of EIF2AK4 [Source:HGNC Symbol;Acc:HGNC:4199]
1613	ENSG00000089157	-0.602624	9.88414	-3.07653	0.0035401	0.0596891	-2.26297	NOT	RPLP0	ribosomal protein lateral stalk subunit P0 [Source:HGNC Symbol;Acc:HGNC:10371]
1614	ENSG00000089159	-0.167703	7.36484	-1.08445	0.283881	0.49806	-6.01509	NOT	PXN	paxillin [Source:HGNC Symbol;Acc:HGNC:9718]
1615	ENSG00000089163	-0.498235	0.207603	-1.90042	0.0637293	0.217418	-4.34025	NOT	SIRT4	sirtuin 4 [Source:HGNC Symbol;Acc:HGNC:14932]
1616	ENSG00000089169	-0.103599	2.5544	-0.331083	0.742102	0.863342	-6.24144	NOT	RPH3A	rabphilin 3A [Source:HGNC Symbol;Acc:HGNC:17056]
1617	ENSG00000089177	-0.171801	3.52134	-0.792544	0.432159	0.636339	-6.11235	NOT	KIF16B	kinesin family member 16B [Source:HGNC Symbol;Acc:HGNC:15869]
1618	ENSG00000089195	-0.0546744	3.94715	-0.379792	0.705868	0.839908	-6.4003	NOT	TRMT6	tRNA methyltransferase 6 [Source:HGNC Symbol;Acc:HGNC:20900]
1619	ENSG00000089199	0.0442704	-3.27524	0.133616	0.894296	0.950144	-5.75871	NOT	CHGB	chromogranin B [Source:HGNC Symbol;Acc:HGNC:1930]
1620	ENSG00000089220	-0.488975	6.37043	-3.0153	0.00419067	0.0639029	-2.44707	NOT	PEBP1	phosphatidylethanolamine binding protein 1 [Source:HGNC Symbol;Acc:HGNC:8630]
1621	ENSG00000089234	0.202046	5.02207	1.53352	0.132076	0.322592	-5.41322	NOT	BRAP	BRCA1 associated protein [Source:HGNC Symbol;Acc:HGNC:1099]
1622	ENSG00000089248	-0.387847	7.15966	-2.10703	0.040662	0.172498	-4.47496	NOT	ERP29	endoplasmic reticulum protein 29 [Source:HGNC Symbol;Acc:HGNC:13799]
1623	ENSG00000089250	0.954106	-2.54705	1.86237	0.0690202	0.226477	-4.24877	NOT	NOS1	nitric oxide synthase 1 [Source:HGNC Symbol;Acc:HGNC:7872]
1624	ENSG00000089280	-0.21723	8.63602	-1.27151	0.210013	0.418826	-5.78761	NOT	FUS	FUS RNA binding protein [Source:HGNC Symbol;Acc:HGNC:4010]
1625	ENSG00000089289	-0.100168	6.04425	-1.05729	0.295966	0.510998	-6.04186	NOT	IGBP1	immunoglobulin binding protein 1 [Source:HGNC Symbol;Acc:HGNC:5461]
1626	ENSG00000089327	-0.444127	8.13819	-2.61561	0.0120443	0.0990799	-3.39775	NOT	FXYD5	FXYD domain containing ion transport regulator 5 [Source:HGNC Symbol;Acc:HGNC:4029]
1627	ENSG00000089335	-0.562241	3.90382	-2.07416	0.0437547	0.17908	-4.41944	NOT	ZNF302	zinc finger protein 302 [Source:HGNC Symbol;Acc:HGNC:13848]
1628	ENSG00000089351	-0.0779894	6.62529	-0.549238	0.58553	0.75616	-6.44915	NOT	GRAMD1A	GRAM domain containing 1A [Source:HGNC Symbol;Acc:HGNC:29305]
1629	ENSG00000089472	0.0807743	-1.52804	0.224667	0.823244	0.910624	-5.83365	NOT	HEPH	hephaestin [Source:HGNC Symbol;Acc:HGNC:4866]
1630	ENSG00000089486	0.0538205	4.69835	0.415351	0.679838	0.823579	-6.45475	NOT	CDIP1	cell death inducing p53 target 1 [Source:HGNC Symbol;Acc:HGNC:13234]
1631	ENSG00000089558	0.915959	-0.407266	2.33776	0.0238573	0.133506	-3.48691	NOT	KCNH4	potassium voltage-gated channel subfamily H member 4 [Source:HGNC Symbol;Acc:HGNC:6253]
1632	ENSG00000089597	-0.586456	7.46462	-2.76053	0.00829164	0.0841599	-3.06687	NOT	GANAB	glucosidase II alpha subunit [Source:HGNC Symbol;Acc:HGNC:4138]
1633	ENSG00000089639	-0.198487	7.93709	-1.32999	0.190155	0.395502	-5.72233	NOT	GMIP	GEM interacting protein [Source:HGNC Symbol;Acc:HGNC:24852]
1634	ENSG00000089682	-0.234542	3.32593	-1.11643	0.270101	0.48437	-5.78786	NOT	RBM41	RNA binding motif protein 41 [Source:HGNC Symbol;Acc:HGNC:25617]
1635	ENSG00000089685	-0.828381	0.305767	-2.52212	0.0152326	0.109759	-3.16518	NOT	BIRC5	baculoviral IAP repeat containing 5 [Source:HGNC Symbol;Acc:HGNC:593]
1636	ENSG00000089692	-0.305624	3.93241	-1.0729	0.288976	0.5038	-5.90444	NOT	LAG3	lymphocyte activating 3 [Source:HGNC Symbol;Acc:HGNC:6476]
1637	ENSG00000089693	0.169922	7.05374	0.893415	0.376339	0.588555	-6.20263	NOT	MLF2	myeloid leukemia factor 2 [Source:HGNC Symbol;Acc:HGNC:7126]
1638	ENSG00000089723	0.678957	0.220124	1.96961	0.0549932	0.201117	-4.21293	NOT	OTUB2	OTU deubiquitinase, ubiquitin aldehyde binding 2 [Source:HGNC Symbol;Acc:HGNC:20351]
1639	ENSG00000089737	0.114144	7.56824	0.591825	0.556899	0.734874	-6.42125	NOT	DDX24	DEAD-box helicase 24 [Source:HGNC Symbol;Acc:HGNC:13266]
1640	ENSG00000089775	-0.222632	5.95459	-1.64939	0.105961	0.284568	-5.26947	NOT	ZBTB25	zinc finger and BTB domain containing 25 [Source:HGNC Symbol;Acc:HGNC:13112]
1641	ENSG00000089820	-0.45287	9.02008	-2.68737	0.0100254	0.0908036	-3.22256	NOT	ARHGAP4	Rho GTPase activating protein 4 [Source:HGNC Symbol;Acc:HGNC:674]
1642	ENSG00000089847	-0.432326	2.03379	-1.95617	0.0566047	0.204231	-4.42597	NOT	ANKRD24	ankyrin repeat domain 24 [Source:HGNC Symbol;Acc:HGNC:29424]
1643	ENSG00000089876	-0.221389	2.26332	-1.11637	0.270127	0.48437	-5.65219	NOT	DHX32	DEAH-box helicase 32 (putative) [Source:HGNC Symbol;Acc:HGNC:16717]
1644	ENSG00000089902	0.408369	6.44858	2.73108	0.00895319	0.086574	-3.13932	NOT	RCOR1	REST corepressor 1 [Source:HGNC Symbol;Acc:HGNC:17441]
1645	ENSG00000089916	0.483949	6.45049	3.1311	0.00304149	0.0572016	-2.15364	NOT	GPATCH2L	G-patch domain containing 2 like [Source:HGNC Symbol;Acc:HGNC:20210]
1646	ENSG00000090006	-0.625658	6.24879	-3.30139	0.00187785	0.0485636	-1.70549	NOT	LTBP4	latent transforming growth factor beta binding protein 4 [Source:HGNC Symbol;Acc:HGNC:6717]
1647	ENSG00000090013	-0.116465	6.44991	-0.420905	0.675807	0.820836	-6.51072	NOT	BLVRB	biliverdin reductase B [Source:HGNC Symbol;Acc:HGNC:1063]
1648	ENSG00000090020	0.399228	5.64073	2.12055	0.0394465	0.170721	-4.43805	NOT	SLC9A1	solute carrier family 9 member A1 [Source:HGNC Symbol;Acc:HGNC:11071]
1649	ENSG00000090054	-0.0561586	5.90732	-0.656812	0.514613	0.703835	-6.37817	NOT	SPTLC1	serine palmitoyltransferase long chain base subunit 1 [Source:HGNC Symbol;Acc:HGNC:11277]
1650	ENSG00000090060	-0.0978017	7.50533	-1.12006	0.268569	0.482972	-5.97585	NOT	PAPOLA	poly(A) polymerase alpha [Source:HGNC Symbol;Acc:HGNC:14981]
1651	ENSG00000090061	0.912236	4.6114	3.14684	0.00291049	0.0564753	-2.05253	NOT	CCNK	cyclin K [Source:HGNC Symbol;Acc:HGNC:1596]
1652	ENSG00000090097	-0.492856	3.59743	-2.47074	0.0172951	0.11503	-3.58516	NOT	PCBP4	poly(rC) binding protein 4 [Source:HGNC Symbol;Acc:HGNC:8652]
1653	ENSG00000090238	0.127006	7.87705	0.576401	0.567186	0.742325	-6.42745	NOT	YPEL3	yippee like 3 [Source:HGNC Symbol;Acc:HGNC:18327]
1654	ENSG00000090263	-0.289807	3.0143	-1.82953	0.0738808	0.235026	-4.75856	NOT	MRPS33	mitochondrial ribosomal protein S33 [Source:HGNC Symbol;Acc:HGNC:16634]
1655	ENSG00000090266	-0.358408	5.4149	-2.17822	0.0346135	0.159982	-4.31916	NOT	NDUFB2	NADH:ubiquinone oxidoreductase subunit B2 [Source:HGNC Symbol;Acc:HGNC:7697]
1656	ENSG00000090273	-0.103949	6.01081	-0.639363	0.525795	0.711753	-6.39109	NOT	NUDC	nuclear distribution C, dynein complex regulator [Source:HGNC Symbol;Acc:HGNC:8045]
1657	ENSG00000090316	0.155759	6.65636	1.13525	0.262221	0.475696	-5.96279	NOT	MAEA	macrophage erythroblast attacher [Source:HGNC Symbol;Acc:HGNC:13731]
17073	ENSG00000248323	3.53082	4.43428	4.63205	3.04e-05	0.00657162	2.27973	UP	LUCAT1	lung cancer associated transcript 1 [Source:HGNC Symbol;Acc:HGNC:48498]
1659	ENSG00000090372	-0.079166	7.10185	-0.68542	0.496559	0.689557	-6.36462	NOT	STRN4	striatin 4 [Source:HGNC Symbol;Acc:HGNC:15721]
1660	ENSG00000090376	0.693004	7.48159	2.37509	0.0218204	0.128821	-3.93248	NOT	IRAK3	interleukin 1 receptor associated kinase 3 [Source:HGNC Symbol;Acc:HGNC:17020]
1661	ENSG00000090382	-0.385103	10.4352	-1.34035	0.186789	0.391246	-5.66979	NOT	LYZ	lysozyme [Source:HGNC Symbol;Acc:HGNC:6740]
1662	ENSG00000090432	-0.0359234	4.41259	-0.245525	0.807155	0.901841	-6.48801	NOT	MUL1	mitochondrial E3 ubiquitin protein ligase 1 [Source:HGNC Symbol;Acc:HGNC:25762]
1663	ENSG00000090447	-0.676534	3.5471	-2.81691	0.00714943	0.0794336	-2.79344	NOT	TFAP4	transcription factor AP-4 [Source:HGNC Symbol;Acc:HGNC:11745]
1664	ENSG00000090470	-0.274343	3.98342	-1.80661	0.0774428	0.240776	-4.90497	NOT	PDCD7	programmed cell death 7 [Source:HGNC Symbol;Acc:HGNC:8767]
1665	ENSG00000090487	-0.287152	6.35198	-2.30194	0.0259707	0.138975	-4.08651	NOT	SPG21	SPG21 abhydrolase domain containing, maspardin [Source:HGNC Symbol;Acc:HGNC:20373]
1666	ENSG00000090520	0.549568	4.27823	2.80435	0.00739043	0.080683	-2.88189	NOT	DNAJB11	DnaJ heat shock protein family (Hsp40) member B11 [Source:HGNC Symbol;Acc:HGNC:14889]
1667	ENSG00000090530	-0.508899	-0.426433	-1.86023	0.0693284	0.227134	-4.35779	NOT	P3H2	prolyl 3-hydroxylase 2 [Source:HGNC Symbol;Acc:HGNC:19317]
1668	ENSG00000090539	0.640344	-2.76405	1.42585	0.16074	0.359394	-4.86716	NOT	CHRD	chordin [Source:HGNC Symbol;Acc:HGNC:1949]
1669	ENSG00000090565	-0.46038	5.85221	-2.89884	0.00574757	0.0722393	-2.73029	NOT	RAB11FIP3	RAB11 family interacting protein 3 [Source:HGNC Symbol;Acc:HGNC:17224]
1670	ENSG00000090581	-0.369671	6.37393	-2.78567	0.00776293	0.0820176	-3.00938	NOT	GNPTG	N-acetylglucosamine-1-phosphate transferase subunit gamma [Source:HGNC Symbol;Acc:HGNC:23026]
1671	ENSG00000090612	-0.280706	2.36838	-1.90653	0.0629119	0.215623	-4.5503	NOT	ZNF268	zinc finger protein 268 [Source:HGNC Symbol;Acc:HGNC:13061]
1672	ENSG00000090615	-0.412198	6.31214	-2.64791	0.0110935	0.0949519	-3.33098	NOT	GOLGA3	golgin A3 [Source:HGNC Symbol;Acc:HGNC:4426]
1673	ENSG00000090621	-0.257644	6.67928	-2.23795	0.0301659	0.149789	-4.21824	NOT	PABPC4	poly(A) binding protein cytoplasmic 4 [Source:HGNC Symbol;Acc:HGNC:8557]
1674	ENSG00000090659	-0.966324	-0.428205	-3.42794	0.00130186	0.0422104	-1.00503	NOT	CD209	CD209 molecule [Source:HGNC Symbol;Acc:HGNC:1641]
1675	ENSG00000090661	0.0467362	4.55713	0.275374	0.784276	0.888172	-6.49205	NOT	CERS4	ceramide synthase 4 [Source:HGNC Symbol;Acc:HGNC:23747]
1676	ENSG00000090674	0.675676	5.78707	2.59563	0.0126694	0.100897	-3.4424	NOT	MCOLN1	mucolipin 1 [Source:HGNC Symbol;Acc:HGNC:13356]
1677	ENSG00000090686	-0.22647	6.91137	-2.34228	0.0236022	0.132908	-4.00357	NOT	USP48	ubiquitin specific peptidase 48 [Source:HGNC Symbol;Acc:HGNC:18533]
1678	ENSG00000090776	-0.554762	2.321	-2.20021	0.0329128	0.156073	-4.00444	NOT	EFNB1	ephrin B1 [Source:HGNC Symbol;Acc:HGNC:3226]
1679	ENSG00000090857	0.30776	4.37228	1.4067	0.166314	0.366634	-5.54398	NOT	PDPR	pyruvate dehydrogenase phosphatase regulatory subunit [Source:HGNC Symbol;Acc:HGNC:30264]
1680	ENSG00000090861	-0.236066	4.78002	-1.34635	0.184863	0.388907	-5.65767	NOT	AARS1	alanyl-tRNA synthetase 1 [Source:HGNC Symbol;Acc:HGNC:20]
1681	ENSG00000090863	-0.487769	7.7596	-3.0212	0.00412333	0.0638587	-2.4286	NOT	GLG1	golgi glycoprotein 1 [Source:HGNC Symbol;Acc:HGNC:4316]
1682	ENSG00000090889	-0.0667709	-0.611477	-0.228883	0.819986	0.909229	-5.8973	NOT	KIF4A	kinesin family member 4A [Source:HGNC Symbol;Acc:HGNC:13339]
1683	ENSG00000090905	0.0770981	6.24968	0.473049	0.638441	0.795575	-6.48627	NOT	TNRC6A	trinucleotide repeat containing adaptor 6A [Source:HGNC Symbol;Acc:HGNC:11969]
1684	ENSG00000090924	-0.0663382	5.81253	-0.42069	0.675963	0.820963	-6.50301	NOT	PLEKHG2	pleckstrin homology and RhoGEF domain containing G2 [Source:HGNC Symbol;Acc:HGNC:29515]
1685	ENSG00000090932	0.192385	-3.1193	0.5965	0.5538	0.732762	-5.60933	NOT	DLL3	delta like canonical Notch ligand 3 [Source:HGNC Symbol;Acc:HGNC:2909]
1686	ENSG00000090971	0.0559125	2.08274	0.24006	0.811362	0.904107	-6.20202	NOT	NAT14	N-acetyltransferase 14 (putative) [Source:HGNC Symbol;Acc:HGNC:28918]
1687	ENSG00000090975	-0.386143	5.65075	-2.33723	0.0238874	0.13355	-4.0028	NOT	PITPNM2	phosphatidylinositol transfer protein membrane associated 2 [Source:HGNC Symbol;Acc:HGNC:21044]
1688	ENSG00000090989	-0.123412	5.67527	-0.941807	0.351268	0.564131	-6.14779	NOT	EXOC1	exocyst complex component 1 [Source:HGNC Symbol;Acc:HGNC:30380]
1689	ENSG00000091039	0.379028	7.11577	2.15388	0.0365856	0.164048	-4.38507	NOT	OSBPL8	oxysterol binding protein like 8 [Source:HGNC Symbol;Acc:HGNC:16396]
1690	ENSG00000091073	-0.156648	4.79251	-0.864081	0.392079	0.603077	-6.1774	NOT	DTX2	deltex E3 ubiquitin ligase 2 [Source:HGNC Symbol;Acc:HGNC:15973]
1691	ENSG00000091106	-0.068336	3.84974	-0.255679	0.799352	0.897349	-6.42828	NOT	NLRC4	NLR family CARD domain containing 4 [Source:HGNC Symbol;Acc:HGNC:16412]
1692	ENSG00000091127	-0.63371	2.08089	-3.55387	0.000898449	0.0367938	-0.782142	NOT	PUS7	pseudouridine synthase 7 [Source:HGNC Symbol;Acc:HGNC:26033]
1693	ENSG00000091128	-0.527504	-2.86706	-1.46582	0.149578	0.346202	-4.81676	NOT	LAMB4	laminin subunit beta 4 [Source:HGNC Symbol;Acc:HGNC:6491]
1694	ENSG00000091129	0.135856	1.57287	0.294956	0.76937	0.879414	-6.12034	NOT	NRCAM	neuronal cell adhesion molecule [Source:HGNC Symbol;Acc:HGNC:7994]
1695	ENSG00000091136	0.409467	1.60781	1.69151	0.0975833	0.273112	-4.80854	NOT	LAMB1	laminin subunit beta 1 [Source:HGNC Symbol;Acc:HGNC:6486]
1696	ENSG00000091137	-0.297644	-1.62227	-0.833688	0.408815	0.61687	-5.53051	NOT	SLC26A4	solute carrier family 26 member 4 [Source:HGNC Symbol;Acc:HGNC:8818]
1697	ENSG00000091138	-0.310497	-1.08044	-0.900753	0.372466	0.584626	-5.50857	NOT	SLC26A3	solute carrier family 26 member 3 [Source:HGNC Symbol;Acc:HGNC:3018]
1698	ENSG00000091140	0.241264	5.57836	1.91249	0.062124	0.214092	-4.8224	NOT	DLD	dihydrolipoamide dehydrogenase [Source:HGNC Symbol;Acc:HGNC:2898]
1699	ENSG00000091157	0.221208	4.55078	1.00074	0.322246	0.535879	-6.03283	NOT	WDR7	WD repeat domain 7 [Source:HGNC Symbol;Acc:HGNC:13490]
1700	ENSG00000091164	0.459293	5.91158	3.08222	0.00348478	0.0594761	-2.27347	NOT	TXNL1	thioredoxin like 1 [Source:HGNC Symbol;Acc:HGNC:12436]
1701	ENSG00000091181	0.307008	2.28812	1.20327	0.235099	0.446577	-5.55387	NOT	IL5RA	interleukin 5 receptor subunit alpha [Source:HGNC Symbol;Acc:HGNC:6017]
1702	ENSG00000091262	0.393883	3.77425	1.13915	0.260606	0.474083	-5.80968	NOT	ABCC6	ATP binding cassette subfamily C member 6 [Source:HGNC Symbol;Acc:HGNC:57]
1703	ENSG00000091317	0.390155	6.01337	1.89762	0.0641061	0.21793	-4.85777	NOT	CMTM6	CKLF like MARVEL transmembrane domain containing 6 [Source:HGNC Symbol;Acc:HGNC:19177]
1704	ENSG00000091409	-0.0102511	3.30635	-0.0381454	0.969739	0.985652	-6.39416	NOT	ITGA6	integrin subunit alpha 6 [Source:HGNC Symbol;Acc:HGNC:6142]
1705	ENSG00000091428	0.443412	-0.775152	1.19977	0.236444	0.447943	-5.23434	NOT	RAPGEF4	Rap guanine nucleotide exchange factor 4 [Source:HGNC Symbol;Acc:HGNC:16626]
1706	ENSG00000091436	0.672393	2.33512	1.97615	0.0542236	0.199684	-4.41283	NOT	MAP3K20	mitogen-activated protein kinase kinase kinase 20 [Source:HGNC Symbol;Acc:HGNC:17797]
1707	ENSG00000091483	-0.412478	3.97074	-2.86051	0.00636803	0.0760852	-2.72792	NOT	FH	fumarate hydratase [Source:HGNC Symbol;Acc:HGNC:3700]
1708	ENSG00000091490	-0.236594	5.99661	-1.68612	0.0986226	0.274611	-5.21222	NOT	SEL1L3	SEL1L family member 3 [Source:HGNC Symbol;Acc:HGNC:29108]
1709	ENSG00000091513	-0.529137	-0.894419	-2.03769	0.0474244	0.186724	-4.02825	NOT	TF	transferrin [Source:HGNC Symbol;Acc:HGNC:11740]
1710	ENSG00000091527	-0.111067	7.81684	-1.22869	0.225509	0.436525	-5.84903	NOT	CDV3	CDV3 homolog [Source:HGNC Symbol;Acc:HGNC:26928]
1711	ENSG00000091536	0.238042	0.603175	0.863877	0.392189	0.603158	-5.68547	NOT	MYO15A	myosin XVA [Source:HGNC Symbol;Acc:HGNC:7594]
1712	ENSG00000091542	0.0727693	6.25241	0.671802	0.505109	0.69612	-6.37299	NOT	ALKBH5	alkB homolog 5, RNA demethylase [Source:HGNC Symbol;Acc:HGNC:25996]
1713	ENSG00000091583	-0.650339	-3.45389	-2.04003	0.0471805	0.186357	-3.93314	NOT	APOH	apolipoprotein H [Source:HGNC Symbol;Acc:HGNC:616]
1714	ENSG00000091592	-0.433258	9.15206	-2.97576	0.00466854	0.0665846	-2.52739	NOT	NLRP1	NLR family pyrin domain containing 1 [Source:HGNC Symbol;Acc:HGNC:14374]
1715	ENSG00000091622	-0.145608	0.466688	-0.822071	0.415326	0.622119	-5.70832	NOT	PITPNM3	PITPNM family member 3 [Source:HGNC Symbol;Acc:HGNC:21043]
1716	ENSG00000091640	-0.209794	5.29528	-1.41015	0.165298	0.365663	-5.60012	NOT	SPAG7	sperm associated antigen 7 [Source:HGNC Symbol;Acc:HGNC:11216]
1717	ENSG00000091651	-0.272727	1.35942	-1.73826	0.0889327	0.259942	-4.71537	NOT	ORC6	origin recognition complex subunit 6 [Source:HGNC Symbol;Acc:HGNC:17151]
1718	ENSG00000091656	0.0974413	-2.88787	0.260673	0.795522	0.894746	-5.7531	NOT	ZFHX4	zinc finger homeobox 4 [Source:HGNC Symbol;Acc:HGNC:30939]
1719	ENSG00000091732	-0.299573	2.10329	-1.67779	0.10025	0.277354	-4.89544	NOT	ZC3HC1	zinc finger C3HC-type containing 1 [Source:HGNC Symbol;Acc:HGNC:29913]
1720	ENSG00000091831	0.134705	2.10954	0.603451	0.549207	0.729998	-6.05469	NOT	ESR1	estrogen receptor 1 [Source:HGNC Symbol;Acc:HGNC:3467]
1721	ENSG00000091844	-0.0297054	0.147681	-0.0940821	0.925457	0.965271	-5.99098	NOT	RGS17	regulator of G protein signaling 17 [Source:HGNC Symbol;Acc:HGNC:14088]
1722	ENSG00000091947	-0.477654	3.48795	-2.52795	0.0150135	0.109025	-3.44935	NOT	TMEM101	transmembrane protein 101 [Source:HGNC Symbol;Acc:HGNC:28653]
1723	ENSG00000091972	-0.0576894	1.75683	-0.193132	0.847716	0.923887	-6.17128	NOT	CD200	CD200 molecule [Source:HGNC Symbol;Acc:HGNC:7203]
1724	ENSG00000091986	-0.299344	0.622528	-0.816078	0.41871	0.625064	-5.7306	NOT	CCDC80	coiled-coil domain containing 80 [Source:HGNC Symbol;Acc:HGNC:30649]
1725	ENSG00000092010	-0.415269	7.80853	-2.2552	0.0289793	0.147111	-4.17751	NOT	PSME1	proteasome activator subunit 1 [Source:HGNC Symbol;Acc:HGNC:9568]
1726	ENSG00000092020	0.582626	2.3962	2.78288	0.00781995	0.0820896	-2.75042	NOT	PPP2R3C	protein phosphatase 2 regulatory subunit B''gamma [Source:HGNC Symbol;Acc:HGNC:17485]
1727	ENSG00000092051	-0.86528	0.241053	-3.31059	0.00182888	0.0482778	-1.32202	NOT	JPH4	junctophilin 4 [Source:HGNC Symbol;Acc:HGNC:20156]
1728	ENSG00000092067	0.801895	0.932281	1.40041	0.168177	0.368885	-5.14578	NOT	CEBPE	CCAAT enhancer binding protein epsilon [Source:HGNC Symbol;Acc:HGNC:1836]
1729	ENSG00000092068	0.367833	0.429901	1.09457	0.279468	0.493548	-5.45223	NOT	SLC7A8	solute carrier family 7 member 8 [Source:HGNC Symbol;Acc:HGNC:11066]
1730	ENSG00000092094	-0.19679	5.50382	-1.44225	0.156086	0.353952	-5.56367	NOT	OSGEP	O-sialoglycoprotein endopeptidase [Source:HGNC Symbol;Acc:HGNC:18028]
1731	ENSG00000092096	-0.62295	1.96954	-2.19124	0.0335975	0.157937	-3.98411	NOT	SLC22A17	solute carrier family 22 member 17 [Source:HGNC Symbol;Acc:HGNC:23095]
1732	ENSG00000092108	0.173851	6.17724	1.2661	0.211925	0.420925	-5.80742	NOT	SCFD1	sec1 family domain containing 1 [Source:HGNC Symbol;Acc:HGNC:20726]
1733	ENSG00000092140	0.0646616	4.78321	0.330156	0.742798	0.863619	-6.49257	NOT	G2E3	G2/M-phase specific E3 ubiquitin protein ligase [Source:HGNC Symbol;Acc:HGNC:20338]
1734	ENSG00000092148	0.0366038	6.70827	0.244361	0.808051	0.902324	-6.57025	NOT	HECTD1	HECT domain E3 ubiquitin protein ligase 1 [Source:HGNC Symbol;Acc:HGNC:20157]
1735	ENSG00000092199	0.382337	8.81739	3.25943	0.00211727	0.0499456	-1.80532	NOT	HNRNPC	heterogeneous nuclear ribonucleoprotein C [Source:HGNC Symbol;Acc:HGNC:5035]
1736	ENSG00000092200	-0.0625723	2.70249	-0.258311	0.797332	0.895907	-6.28215	NOT	RPGRIP1	RPGR interacting protein 1 [Source:HGNC Symbol;Acc:HGNC:13436]
1737	ENSG00000092201	-0.221727	5.92217	-1.62536	0.110997	0.292253	-5.30614	NOT	SUPT16H	SPT16 homolog, facilitates chromatin remodeling subunit [Source:HGNC Symbol;Acc:HGNC:11465]
1738	ENSG00000092203	0.397488	5.80443	3.38973	0.00145513	0.0430761	-1.4641	NOT	TOX4	TOX high mobility group box family member 4 [Source:HGNC Symbol;Acc:HGNC:20161]
1739	ENSG00000092208	0.040447	2.39006	0.270954	0.787652	0.890098	-6.23572	NOT	GEMIN2	gem nuclear organelle associated protein 2 [Source:HGNC Symbol;Acc:HGNC:10884]
1740	ENSG00000092295	-0.00911917	1.51974	-0.0519476	0.958798	0.980862	-6.15617	NOT	TGM1	transglutaminase 1 [Source:HGNC Symbol;Acc:HGNC:11777]
1741	ENSG00000092330	-0.255074	5.58112	-1.76898	0.0836042	0.251163	-5.06881	NOT	TINF2	TERF1 interacting nuclear factor 2 [Source:HGNC Symbol;Acc:HGNC:11824]
1742	ENSG00000092345	0.182789	-1.11212	0.511235	0.61166	0.776405	-5.75966	NOT	DAZL	deleted in azoospermia like [Source:HGNC Symbol;Acc:HGNC:2685]
1743	ENSG00000092377	-0.000709985	-3.39126	-0.00195368	0.99845	0.9994	-5.76197	NOT	TBL1Y	transducin beta like 1 Y-linked [Source:HGNC Symbol;Acc:HGNC:18502]
1744	ENSG00000092421	-0.251193	1.79977	-1.57661	0.121817	0.308122	-5.01146	NOT	SEMA6A	semaphorin 6A [Source:HGNC Symbol;Acc:HGNC:10738]
1745	ENSG00000092439	0.141528	6.00473	0.991969	0.326462	0.539577	-6.10695	NOT	TRPM7	transient receptor potential cation channel subfamily M member 7 [Source:HGNC Symbol;Acc:HGNC:17994]
1746	ENSG00000092445	0.140462	-2.57114	0.381869	0.704337	0.83905	-5.73248	NOT	TYRO3	TYRO3 protein tyrosine kinase [Source:HGNC Symbol;Acc:HGNC:12446]
1747	ENSG00000092470	0.0590734	2.62712	0.381975	0.704259	0.83905	-6.23148	NOT	WDR76	WD repeat domain 76 [Source:HGNC Symbol;Acc:HGNC:25773]
1748	ENSG00000092531	-0.0568535	-0.200225	-0.266984	0.790689	0.89173	-5.92571	NOT	SNAP23	synaptosome associated protein 23 [Source:HGNC Symbol;Acc:HGNC:11131]
1749	ENSG00000092607	0.641756	-2.53225	1.54239	0.12991	0.319678	-4.72377	NOT	TBX15	T-box transcription factor 15 [Source:HGNC Symbol;Acc:HGNC:11594]
1750	ENSG00000092621	-0.308444	1.87525	-1.33426	0.188763	0.394031	-5.35099	NOT	PHGDH	phosphoglycerate dehydrogenase [Source:HGNC Symbol;Acc:HGNC:8923]
1751	ENSG00000092758	0.51607	2.26322	1.31728	0.194344	0.400836	-5.41099	NOT	COL9A3	collagen type IX alpha 3 chain [Source:HGNC Symbol;Acc:HGNC:2219]
1752	ENSG00000092820	0.0552674	8.91554	0.241968	0.809893	0.903359	-6.55105	NOT	EZR	ezrin [Source:HGNC Symbol;Acc:HGNC:12691]
1753	ENSG00000092841	-0.232394	8.61485	-1.09257	0.280339	0.494411	-5.99351	NOT	MYL6	myosin light chain 6 [Source:HGNC Symbol;Acc:HGNC:7587]
1754	ENSG00000092847	0.162001	6.17081	1.38717	0.172152	0.373974	-5.65233	NOT	AGO1	argonaute RISC component 1 [Source:HGNC Symbol;Acc:HGNC:3262]
1755	ENSG00000092850	0.179109	-0.900461	0.379983	0.705727	0.839908	-5.82926	NOT	TEKT2	tektin 2 [Source:HGNC Symbol;Acc:HGNC:11725]
1756	ENSG00000092853	-0.583761	0.433758	-2.41629	0.0197545	0.122346	-3.39306	NOT	CLSPN	claspin [Source:HGNC Symbol;Acc:HGNC:19715]
1757	ENSG00000092871	0.221977	4.22276	1.9233	0.060717	0.211957	-4.72331	NOT	RFFL	ring finger and FYVE like domain containing E3 ubiquitin protein ligase [Source:HGNC Symbol;Acc:HGNC:24821]
1758	ENSG00000092929	-0.343834	7.97091	-2.28451	0.0270588	0.141809	-4.11633	NOT	UNC13D	unc-13 homolog D [Source:HGNC Symbol;Acc:HGNC:23147]
1759	ENSG00000092931	-0.00291502	4.54203	-0.0372663	0.970436	0.98585	-6.52835	NOT	MFSD11	major facilitator superfamily domain containing 11 [Source:HGNC Symbol;Acc:HGNC:25458]
1760	ENSG00000092964	-0.481559	5.13528	-1.29013	0.203528	0.411503	-5.74829	NOT	DPYSL2	dihydropyrimidinase like 2 [Source:HGNC Symbol;Acc:HGNC:3014]
1761	ENSG00000092969	0.551181	-1.74945	1.88831	0.0653736	0.220299	-4.23794	NOT	TGFB2	transforming growth factor beta 2 [Source:HGNC Symbol;Acc:HGNC:11768]
1762	ENSG00000092978	-0.15498	4.48839	-0.966718	0.338799	0.551803	-6.0625	NOT	GPATCH2	G-patch domain containing 2 [Source:HGNC Symbol;Acc:HGNC:25499]
1763	ENSG00000093000	0.0145906	6.74209	0.127881	0.898807	0.952641	-6.59197	NOT	NUP50	nucleoporin 50 [Source:HGNC Symbol;Acc:HGNC:8065]
1764	ENSG00000093009	-0.715791	0.257073	-2.20762	0.0323564	0.155038	-3.79386	NOT	CDC45	cell division cycle 45 [Source:HGNC Symbol;Acc:HGNC:1739]
1765	ENSG00000093010	-0.788081	5.63515	-3.83589	0.000383335	0.0251375	-0.210443	NOT	COMT	catechol-O-methyltransferase [Source:HGNC Symbol;Acc:HGNC:2228]
1766	ENSG00000093072	-0.857168	8.07378	-2.8047	0.00738363	0.080683	-2.9564	NOT	ADA2	adenosine deaminase 2 [Source:HGNC Symbol;Acc:HGNC:1839]
4858	ENSG00000125735	3.52725	2.34456	5.7303	7.59e-07	0.000762006	5.75551	UP	TNFSF14	TNF superfamily member 14 [Source:HGNC Symbol;Acc:HGNC:11930]
1768	ENSG00000093144	-0.156236	5.26826	-0.915845	0.36458	0.577233	-6.15773	NOT	ECHDC1	ethylmalonyl-CoA decarboxylase 1 [Source:HGNC Symbol;Acc:HGNC:21489]
1769	ENSG00000093167	0.13487	6.74637	1.33243	0.189358	0.394671	-5.72675	NOT	LRRFIP2	LRR binding FLII interacting protein 2 [Source:HGNC Symbol;Acc:HGNC:6703]
1770	ENSG00000093183	-0.0824284	5.56392	-0.644772	0.522315	0.709359	-6.37762	NOT	SEC22C	SEC22 homolog C, vesicle trafficking protein [Source:HGNC Symbol;Acc:HGNC:16828]
1771	ENSG00000093217	-0.647913	1.64273	-2.88154	0.00602035	0.0740639	-2.45992	NOT	XYLB	xylulokinase [Source:HGNC Symbol;Acc:HGNC:12839]
1772	ENSG00000094631	-0.341307	5.9081	-2.63014	0.0116077	0.097304	-3.36739	NOT	HDAC6	histone deacetylase 6 [Source:HGNC Symbol;Acc:HGNC:14064]
1773	ENSG00000094804	-0.356567	0.0837969	-1.1744	0.24635	0.458837	-5.34065	NOT	CDC6	cell division cycle 6 [Source:HGNC Symbol;Acc:HGNC:1744]
1774	ENSG00000094841	0.300227	3.5177	1.76044	0.0850585	0.253178	-4.92709	NOT	UPRT	uracil phosphoribosyltransferase homolog [Source:HGNC Symbol;Acc:HGNC:28334]
1775	ENSG00000094880	-0.254689	3.9746	-1.81457	0.0761893	0.238992	-4.89068	NOT	CDC23	cell division cycle 23 [Source:HGNC Symbol;Acc:HGNC:1724]
1776	ENSG00000094914	-0.447056	4.68222	-2.58416	0.0130415	0.102134	-3.42564	NOT	AAAS	aladin WD repeat nucleoporin [Source:HGNC Symbol;Acc:HGNC:13666]
1777	ENSG00000094916	-0.250112	5.21103	-1.46003	0.151157	0.348186	-5.52789	NOT	CBX5	chromobox 5 [Source:HGNC Symbol;Acc:HGNC:1555]
1778	ENSG00000094975	0.7453	5.94593	3.87151	0.000343574	0.0236727	-0.113043	NOT	SUCO	SUN domain containing ossification factor [Source:HGNC Symbol;Acc:HGNC:1240]
1779	ENSG00000095002	-0.160808	3.77764	-1.0106	0.317557	0.531279	-5.95017	NOT	MSH2	mutS homolog 2 [Source:HGNC Symbol;Acc:HGNC:7325]
1780	ENSG00000095015	0.0194239	7.57932	0.107632	0.914761	0.960476	-6.59027	NOT	MAP3K1	mitogen-activated protein kinase kinase kinase 1 [Source:HGNC Symbol;Acc:HGNC:6848]
1781	ENSG00000095066	0.48012	4.91641	1.73691	0.0891728	0.260259	-5.09045	NOT	HOOK2	hook microtubule tethering protein 2 [Source:HGNC Symbol;Acc:HGNC:19885]
1782	ENSG00000095139	-0.0843928	5.98986	-0.831309	0.410143	0.617973	-6.2509	NOT	ARCN1	archain 1 [Source:HGNC Symbol;Acc:HGNC:649]
1783	ENSG00000095203	0.693634	-3.21734	1.53345	0.132093	0.322592	-4.71033	NOT	EPB41L4B	erythrocyte membrane protein band 4.1 like 4B [Source:HGNC Symbol;Acc:HGNC:19818]
1784	ENSG00000095209	0.652937	4.01896	3.21258	0.00241862	0.0520984	-1.84165	NOT	TMEM38B	transmembrane protein 38B [Source:HGNC Symbol;Acc:HGNC:25535]
1785	ENSG00000095261	-0.0077821	4.20623	-0.0551794	0.956237	0.979687	-6.49734	NOT	PSMD5	proteasome 26S subunit, non-ATPase 5 [Source:HGNC Symbol;Acc:HGNC:9563]
1786	ENSG00000095303	-0.161259	6.11377	-0.832633	0.409403	0.617218	-6.25144	NOT	PTGS1	prostaglandin-endoperoxide synthase 1 [Source:HGNC Symbol;Acc:HGNC:9604]
1787	ENSG00000095319	-0.353	5.68659	-3.48006	0.00111743	0.0404813	-1.21607	NOT	NUP188	nucleoporin 188 [Source:HGNC Symbol;Acc:HGNC:17859]
1788	ENSG00000095321	-0.316176	4.14524	-2.08398	0.0428095	0.176829	-4.42391	NOT	CRAT	carnitine O-acetyltransferase [Source:HGNC Symbol;Acc:HGNC:2342]
1789	ENSG00000095370	-0.0436227	6.91721	-0.28652	0.775781	0.883071	-6.55867	NOT	SH2D3C	SH2 domain containing 3C [Source:HGNC Symbol;Acc:HGNC:16884]
1790	ENSG00000095380	0.0429156	3.22668	0.287712	0.774874	0.882776	-6.34229	NOT	NANS	N-acetylneuraminate synthase [Source:HGNC Symbol;Acc:HGNC:19237]
1791	ENSG00000095383	0.0466164	5.43622	0.333714	0.740129	0.862208	-6.52504	NOT	TBC1D2	TBC1 domain family member 2 [Source:HGNC Symbol;Acc:HGNC:18026]
1792	ENSG00000095397	0.579129	4.08829	2.37237	0.0219633	0.129296	-3.83455	NOT	WHRN	whirlin [Source:HGNC Symbol;Acc:HGNC:16361]
1793	ENSG00000095464	-0.545625	2.53878	-2.69775	0.00976069	0.0900013	-2.9708	NOT	PDE6C	phosphodiesterase 6C [Source:HGNC Symbol;Acc:HGNC:8787]
1794	ENSG00000095485	0.118848	5.7402	0.869999	0.38887	0.600317	-6.21347	NOT	CWF19L1	CWF19 like cell cycle control factor 1 [Source:HGNC Symbol;Acc:HGNC:25613]
1795	ENSG00000095564	0.451859	7.31684	2.07099	0.0440631	0.179775	-4.54379	NOT	BTAF1	B-TFIID TATA-box binding protein associated factor 1 [Source:HGNC Symbol;Acc:HGNC:17307]
1796	ENSG00000095574	0.889603	4.42085	2.22685	0.0309521	0.15188	-4.15797	NOT	IKZF5	IKAROS family zinc finger 5 [Source:HGNC Symbol;Acc:HGNC:14283]
1797	ENSG00000095585	-0.353145	2.63922	-1.29074	0.203318	0.4112	-5.501	NOT	BLNK	B cell linker [Source:HGNC Symbol;Acc:HGNC:14211]
1798	ENSG00000095587	-0.0589089	-1.73442	-0.154294	0.87806	0.940513	-5.83507	NOT	TLL2	tolloid like 2 [Source:HGNC Symbol;Acc:HGNC:11844]
1799	ENSG00000095627	-0.473145	-2.61967	-1.39788	0.168931	0.369794	-4.91259	NOT	TDRD1	tudor domain containing 1 [Source:HGNC Symbol;Acc:HGNC:11712]
1800	ENSG00000095637	0.409563	0.98504	1.60016	0.116488	0.300344	-4.87878	NOT	SORBS1	sorbin and SH3 domain containing 1 [Source:HGNC Symbol;Acc:HGNC:14565]
1801	ENSG00000095713	0.566949	-3.34822	1.35221	0.182994	0.386899	-4.93604	NOT	CRTAC1	cartilage acidic protein 1 [Source:HGNC Symbol;Acc:HGNC:14882]
1802	ENSG00000095739	0.332835	-0.526179	1.00837	0.318612	0.532356	-5.44847	NOT	BAMBI	BMP and activin membrane bound inhibitor [Source:HGNC Symbol;Acc:HGNC:30251]
1803	ENSG00000095752	-0.0476553	-1.65772	-0.131647	0.895844	0.951046	-5.84265	NOT	IL11	interleukin 11 [Source:HGNC Symbol;Acc:HGNC:5966]
1804	ENSG00000095777	0.7971	-2.42728	1.76562	0.0841734	0.251985	-4.40489	NOT	MYO3A	myosin IIIA [Source:HGNC Symbol;Acc:HGNC:7601]
1805	ENSG00000095787	0.340553	8.16234	2.79414	0.00759195	0.0815348	-2.98255	NOT	WAC	WW domain containing adaptor with coiled-coil [Source:HGNC Symbol;Acc:HGNC:17327]
1806	ENSG00000095794	0.686155	4.93386	2.62983	0.011617	0.0973241	-3.33205	NOT	CREM	cAMP responsive element modulator [Source:HGNC Symbol;Acc:HGNC:2352]
1807	ENSG00000095917	-0.452845	-3.134	-1.1314	0.263818	0.477544	-5.19243	NOT	TPSD1	tryptase delta 1 [Source:HGNC Symbol;Acc:HGNC:14118]
1808	ENSG00000095932	0.317053	0.794979	0.657573	0.514127	0.703357	-5.85651	NOT	SMIM24	small integral membrane protein 24 [Source:HGNC Symbol;Acc:HGNC:37244]
4188	ENSG00000118785	3.51756	-0.561935	4.76164	1.99e-05	0.0051433	2.6711	UP	SPP1	secreted phosphoprotein 1 [Source:HGNC Symbol;Acc:HGNC:11255]
1810	ENSG00000095970	-0.306166	-2.08962	-1.00037	0.322424	0.536111	-5.36549	NOT	TREM2	triggering receptor expressed on myeloid cells 2 [Source:HGNC Symbol;Acc:HGNC:17761]
1811	ENSG00000096006	1.44023	1.80352	1.62576	0.110911	0.292182	-4.91797	NOT	CRISP3	cysteine rich secretory protein 3 [Source:HGNC Symbol;Acc:HGNC:16904]
1812	ENSG00000096060	-0.384903	7.34695	-1.87502	0.067221	0.223224	-4.8995	NOT	FKBP5	FKBP prolyl isomerase 5 [Source:HGNC Symbol;Acc:HGNC:3721]
3124	ENSG00000108821	3.42776	-0.373092	5.36078	2.67e-06	0.00164152	4.45272	UP	COL1A1	collagen type I alpha 1 chain [Source:HGNC Symbol;Acc:HGNC:2197]
1814	ENSG00000096070	0.235964	5.31715	1.57484	0.122227	0.308721	-5.36583	NOT	BRPF3	bromodomain and PHD finger containing 3 [Source:HGNC Symbol;Acc:HGNC:14256]
1815	ENSG00000096080	-0.0077626	2.85229	-0.048244	0.961733	0.982278	-6.33317	NOT	MRPS18A	mitochondrial ribosomal protein S18A [Source:HGNC Symbol;Acc:HGNC:14515]
1816	ENSG00000096088	0.129769	-2.34595	0.451147	0.654028	0.805248	-5.7173	NOT	PGC	progastricsin [Source:HGNC Symbol;Acc:HGNC:8890]
1817	ENSG00000096092	-0.626358	2.08061	-3.10683	0.00325454	0.0584283	-1.94802	NOT	TMEM14A	transmembrane protein 14A [Source:HGNC Symbol;Acc:HGNC:21076]
1818	ENSG00000096093	0.0369064	3.41663	0.309139	0.758628	0.873446	-6.36053	NOT	EFHC1	EF-hand domain containing 1 [Source:HGNC Symbol;Acc:HGNC:16406]
1819	ENSG00000096384	-0.342214	8.44886	-1.96167	0.0559393	0.203115	-4.73523	NOT	HSP90AB1	heat shock protein 90 alpha family class B member 1 [Source:HGNC Symbol;Acc:HGNC:5258]
1820	ENSG00000096395	-0.52084	-0.50772	-1.71989	0.0922522	0.265238	-4.57531	NOT	MLN	motilin [Source:HGNC Symbol;Acc:HGNC:7141]
1821	ENSG00000096401	0.55446	5.23347	3.6138	0.000751476	0.034602	-0.831664	NOT	CDC5L	cell division cycle 5 like [Source:HGNC Symbol;Acc:HGNC:1743]
1822	ENSG00000096433	-0.487567	6.43981	-2.2034	0.0326721	0.155648	-4.28638	NOT	ITPR3	inositol 1,4,5-trisphosphate receptor type 3 [Source:HGNC Symbol;Acc:HGNC:6182]
1823	ENSG00000096654	0.150013	2.45092	0.61836	0.539423	0.721809	-6.09116	NOT	ZNF184	zinc finger protein 184 [Source:HGNC Symbol;Acc:HGNC:12975]
1824	ENSG00000096696	0.000794822	-1.00564	0.00165889	0.998684	0.9994	-5.89102	NOT	DSP	desmoplakin [Source:HGNC Symbol;Acc:HGNC:3052]
1825	ENSG00000096717	0.0327653	5.2718	0.275955	0.783833	0.887848	-6.53619	NOT	SIRT1	sirtuin 1 [Source:HGNC Symbol;Acc:HGNC:14929]
1826	ENSG00000096746	0.181395	6.95466	0.864816	0.391679	0.603022	-6.22778	NOT	HNRNPH3	heterogeneous nuclear ribonucleoprotein H3 [Source:HGNC Symbol;Acc:HGNC:5043]
1827	ENSG00000096872	-0.115082	3.36477	-0.931164	0.356686	0.569989	-5.97594	NOT	IFT74	intraflagellar transport 74 [Source:HGNC Symbol;Acc:HGNC:21424]
1828	ENSG00000096968	-0.270545	6.20003	-1.13292	0.263188	0.476771	-5.96249	NOT	JAK2	Janus kinase 2 [Source:HGNC Symbol;Acc:HGNC:6192]
1829	ENSG00000096996	-0.403186	5.85714	-2.52443	0.0151456	0.109545	-3.60422	NOT	IL12RB1	interleukin 12 receptor subunit beta 1 [Source:HGNC Symbol;Acc:HGNC:5971]
1830	ENSG00000097007	-0.315101	5.46719	-3.30737	0.00184589	0.0484294	-1.67773	NOT	ABL1	ABL proto-oncogene 1, non-receptor tyrosine kinase [Source:HGNC Symbol;Acc:HGNC:76]
1831	ENSG00000097021	-0.326511	3.11589	-2.26715	0.0281824	0.145056	-3.9588	NOT	ACOT7	acyl-CoA thioesterase 7 [Source:HGNC Symbol;Acc:HGNC:24157]
1832	ENSG00000097033	0.110351	7.08218	1.01851	0.313826	0.527656	-6.08488	NOT	SH3GLB1	SH3 domain containing GRB2 like, endophilin B1 [Source:HGNC Symbol;Acc:HGNC:10833]
1833	ENSG00000097046	-0.0720473	3.29923	-0.455566	0.65087	0.80387	-6.29156	NOT	CDC7	cell division cycle 7 [Source:HGNC Symbol;Acc:HGNC:1745]
1834	ENSG00000097096	-0.349093	1.83836	-0.926147	0.359259	0.572174	-5.78632	NOT	SYDE2	synapse defective Rho GTPase homolog 2 [Source:HGNC Symbol;Acc:HGNC:25841]
1835	ENSG00000099139	0.136476	4.38662	0.843413	0.403412	0.612328	-6.16197	NOT	PCSK5	proprotein convertase subtilisin/kexin type 5 [Source:HGNC Symbol;Acc:HGNC:8747]
20455	ENSG00000285106	3.44715	0.9889	5.98296	3.19e-07	0.000413626	6.45358	UP	AC016831.6	novel transcript
1837	ENSG00000099203	-0.0631774	2.72334	-0.37626	0.708473	0.841462	-6.24787	NOT	TMED1	transmembrane p24 trafficking protein 1 [Source:HGNC Symbol;Acc:HGNC:17291]
1838	ENSG00000099204	-0.079032	6.9666	-0.36737	0.715048	0.845731	-6.53202	NOT	ABLIM1	actin binding LIM protein 1 [Source:HGNC Symbol;Acc:HGNC:78]
1839	ENSG00000099219	-0.369822	4.19347	-2.11244	0.0401719	0.17154	-4.3739	NOT	ERMP1	endoplasmic reticulum metallopeptidase 1 [Source:HGNC Symbol;Acc:HGNC:23703]
1840	ENSG00000099246	0.311151	6.08644	2.53941	0.0145906	0.107245	-3.57484	NOT	RAB18	RAB18, member RAS oncogene family [Source:HGNC Symbol;Acc:HGNC:14244]
1841	ENSG00000099250	-0.631093	1.23604	-2.65976	0.0107624	0.0936505	-2.93554	NOT	NRP1	neuropilin 1 [Source:HGNC Symbol;Acc:HGNC:8004]
1842	ENSG00000099251	-0.0134384	2.64118	-0.0559659	0.955614	0.979388	-6.305	NOT	HSD17B7P2	hydroxysteroid 17-beta dehydrogenase 7 pseudogene 2 [Source:HGNC Symbol;Acc:HGNC:28120]
1843	ENSG00000099256	0.164727	1.14664	0.818454	0.417367	0.624042	-5.78517	NOT	PRTFDC1	phosphoribosyl transferase domain containing 1 [Source:HGNC Symbol;Acc:HGNC:23333]
1844	ENSG00000099282	0.0155208	1.07993	0.0603365	0.952152	0.977785	-6.10066	NOT	TSPAN15	tetraspanin 15 [Source:HGNC Symbol;Acc:HGNC:23298]
1845	ENSG00000099284	-0.423047	1.24555	-2.2494	0.0293734	0.148096	-3.79591	NOT	MACROH2A2	macroH2A.2 histone [Source:HGNC Symbol;Acc:HGNC:14453]
1846	ENSG00000099290	-0.171831	6.3532	-1.79944	0.078586	0.24233	-5.03051	NOT	WASHC2A	WASH complex subunit 2A [Source:HGNC Symbol;Acc:HGNC:23416]
1847	ENSG00000099308	0.204749	6.09832	1.17209	0.247266	0.459868	-5.91774	NOT	MAST3	microtubule associated serine/threonine kinase 3 [Source:HGNC Symbol;Acc:HGNC:19036]
1848	ENSG00000099330	-0.446158	3.44423	-2.27969	0.0273666	0.142747	-3.96978	NOT	OCEL1	occludin/ELL domain containing 1 [Source:HGNC Symbol;Acc:HGNC:26221]
1849	ENSG00000099331	0.0630377	9.06435	0.54176	0.590629	0.760612	-6.43145	NOT	MYO9B	myosin IXB [Source:HGNC Symbol;Acc:HGNC:7609]
1850	ENSG00000099337	-0.290526	5.13883	-1.56933	0.123503	0.310324	-5.36678	NOT	KCNK6	potassium two pore domain channel subfamily K member 6 [Source:HGNC Symbol;Acc:HGNC:6281]
1851	ENSG00000099338	0.0229377	3.68918	0.151317	0.880395	0.94197	-6.43047	NOT	CATSPERG	cation channel sperm associated auxiliary subunit gamma [Source:HGNC Symbol;Acc:HGNC:25243]
1852	ENSG00000099341	-0.223649	6.06424	-1.68434	0.098969	0.275206	-5.21602	NOT	PSMD8	proteasome 26S subunit, non-ATPase 8 [Source:HGNC Symbol;Acc:HGNC:9566]
1853	ENSG00000099364	-0.524269	4.48974	-3.16788	0.00274365	0.055198	-1.99882	NOT	FBXL19	F-box and leucine rich repeat protein 19 [Source:HGNC Symbol;Acc:HGNC:25300]
1854	ENSG00000099365	-0.0656891	1.03983	-0.327673	0.744663	0.864476	-6.04584	NOT	STX1B	syntaxin 1B [Source:HGNC Symbol;Acc:HGNC:18539]
1855	ENSG00000099377	-0.444524	0.290924	-1.6288	0.110264	0.290953	-4.77654	NOT	HSD3B7	hydroxy-delta-5-steroid dehydrogenase, 3 beta- and steroid delta-isomerase 7 [Source:HGNC Symbol;Acc:HGNC:18324]
1856	ENSG00000099381	-0.396408	6.09714	-2.60563	0.012353	0.100022	-3.42558	NOT	SETD1A	SET domain containing 1A, histone lysine methyltransferase [Source:HGNC Symbol;Acc:HGNC:29010]
1857	ENSG00000099385	-0.221974	2.29642	-1.88033	0.0664775	0.221967	-4.58648	NOT	BCL7C	BAF chromatin remodeling complex subunit BCL7C [Source:HGNC Symbol;Acc:HGNC:1006]
1858	ENSG00000099617	0.668711	-3.15321	1.96685	0.0553206	0.201787	-4.0605	NOT	EFNA2	ephrin A2 [Source:HGNC Symbol;Acc:HGNC:3222]
1859	ENSG00000099622	-0.320297	8.58693	-1.73861	0.088871	0.259891	-5.11785	NOT	CIRBP	cold inducible RNA binding protein [Source:HGNC Symbol;Acc:HGNC:1982]
1860	ENSG00000099624	-0.426577	5.7389	-1.98276	0.0534543	0.197868	-4.69954	NOT	ATP5F1D	ATP synthase F1 subunit delta [Source:HGNC Symbol;Acc:HGNC:837]
1861	ENSG00000099625	0.568715	-2.32262	1.49651	0.14143	0.335054	-4.79423	NOT	CBARP	CACN subunit beta associated regulatory protein [Source:HGNC Symbol;Acc:HGNC:28617]
1862	ENSG00000099715	0.391706	-2.80108	0.821826	0.415464	0.622224	-5.47632	NOT	PCDH11Y	protocadherin 11 Y-linked [Source:HGNC Symbol;Acc:HGNC:15813]
1863	ENSG00000099725	-0.658827	5.00975	-0.699439	0.487841	0.682489	-6.31584	NOT	PRKY	protein kinase Y-linked (pseudogene) [Source:HGNC Symbol;Acc:HGNC:9444]
1864	ENSG00000099769	-0.473995	-1.81707	-1.66062	0.103672	0.281631	-4.5917	NOT	IGFALS	insulin like growth factor binding protein acid labile subunit [Source:HGNC Symbol;Acc:HGNC:5468]
1865	ENSG00000099783	-0.251695	8.27355	-2.2081	0.032321	0.155	-4.26803	NOT	HNRNPM	heterogeneous nuclear ribonucleoprotein M [Source:HGNC Symbol;Acc:HGNC:5046]
1866	ENSG00000099785	-0.205665	5.9843	-1.35481	0.182172	0.385634	-5.69233	NOT	MARCHF2	membrane associated ring-CH-type finger 2 [Source:HGNC Symbol;Acc:HGNC:28038]
1867	ENSG00000099795	-0.404748	5.55296	-1.97951	0.0538316	0.198841	-4.70084	NOT	NDUFB7	NADH:ubiquinone oxidoreductase subunit B7 [Source:HGNC Symbol;Acc:HGNC:7702]
1868	ENSG00000099797	-0.113957	5.99452	-0.611064	0.5442	0.72575	-6.40842	NOT	TECR	trans-2,3-enoyl-CoA reductase [Source:HGNC Symbol;Acc:HGNC:4551]
1869	ENSG00000099800	-0.393203	3.96412	-1.71834	0.0925373	0.265673	-5.04829	NOT	TIMM13	translocase of inner mitochondrial membrane 13 [Source:HGNC Symbol;Acc:HGNC:11816]
1870	ENSG00000099804	-0.0737119	6.22207	-0.322335	0.748676	0.866853	-6.54583	NOT	CDC34	cell division cycle 34 [Source:HGNC Symbol;Acc:HGNC:1734]
1871	ENSG00000099814	-0.306411	1.89114	-1.46313	0.150311	0.347161	-5.18371	NOT	CEP170B	centrosomal protein 170B [Source:HGNC Symbol;Acc:HGNC:20362]
1872	ENSG00000099817	-0.345406	6.85975	-2.23251	0.0305486	0.150757	-4.22893	NOT	POLR2E	RNA polymerase II subunit E [Source:HGNC Symbol;Acc:HGNC:9192]
1873	ENSG00000099821	-0.429139	6.19502	-2.35716	0.0227781	0.131122	-3.96983	NOT	POLRMT	RNA polymerase mitochondrial [Source:HGNC Symbol;Acc:HGNC:9200]
1874	ENSG00000099822	-0.0502137	2.18215	-0.243982	0.808343	0.902504	-6.21592	NOT	HCN2	hyperpolarization activated cyclic nucleotide gated potassium and sodium channel 2 [Source:HGNC Symbol;Acc:HGNC:4846]
1875	ENSG00000099834	-0.0523172	2.32736	-0.33709	0.7376	0.860478	-6.20867	NOT	CDHR5	cadherin related family member 5 [Source:HGNC Symbol;Acc:HGNC:7521]
1876	ENSG00000099840	0.0711807	3.23541	0.352486	0.726102	0.852288	-6.32271	NOT	IZUMO4	IZUMO family member 4 [Source:HGNC Symbol;Acc:HGNC:26950]
1877	ENSG00000099849	-0.35722	4.67835	-1.65801	0.1042	0.282344	-5.20477	NOT	RASSF7	Ras association domain family member 7 [Source:HGNC Symbol;Acc:HGNC:1166]
4666	ENSG00000124107	3.41706	1.98905	3.73829	0.000516365	0.0285337	-0.236665	UP	SLPI	secretory leukocyte peptidase inhibitor [Source:HGNC Symbol;Acc:HGNC:11092]
1879	ENSG00000099864	-0.992386	-0.561347	-2.54908	0.0142421	0.106288	-3.05922	NOT	PALM	paralemmin [Source:HGNC Symbol;Acc:HGNC:8594]
1880	ENSG00000099866	-0.695554	-1.23313	-1.59608	0.117399	0.301657	-4.71405	NOT	MADCAM1	mucosal vascular addressin cell adhesion molecule 1 [Source:HGNC Symbol;Acc:HGNC:6765]
1881	ENSG00000099875	0.132959	8.63702	0.892236	0.376964	0.588991	-6.18883	NOT	MKNK2	MAPK interacting serine/threonine kinase 2 [Source:HGNC Symbol;Acc:HGNC:7111]
1882	ENSG00000099889	-0.655892	3.18798	-2.33428	0.0240559	0.133678	-3.8309	NOT	ARVCF	ARVCF delta catenin family member [Source:HGNC Symbol;Acc:HGNC:728]
1883	ENSG00000099899	-0.442465	5.1271	-2.38176	0.0214733	0.127672	-3.89134	NOT	TRMT2A	tRNA methyltransferase 2 homolog A [Source:HGNC Symbol;Acc:HGNC:24974]
1884	ENSG00000099901	-0.423403	4.90333	-2.51488	0.0155093	0.11071	-3.59271	NOT	RANBP1	RAN binding protein 1 [Source:HGNC Symbol;Acc:HGNC:9847]
1885	ENSG00000099904	-0.738279	5.80005	-4.36518	7.25e-05	0.0112049	1.36353	NOT	ZDHHC8	zinc finger DHHC-type palmitoyltransferase 8 [Source:HGNC Symbol;Acc:HGNC:18474]
1886	ENSG00000099910	-0.117522	4.57387	-1.12992	0.264434	0.478442	-5.9022	NOT	KLHL22	kelch like family member 22 [Source:HGNC Symbol;Acc:HGNC:25888]
1887	ENSG00000099917	-0.211498	8.27164	-2.37885	0.0216241	0.128174	-3.91685	NOT	MED15	mediator complex subunit 15 [Source:HGNC Symbol;Acc:HGNC:14248]
1888	ENSG00000099940	-0.0354041	4.33753	-0.30034	0.765287	0.877214	-6.46633	NOT	SNAP29	synaptosome associated protein 29 [Source:HGNC Symbol;Acc:HGNC:11133]
1889	ENSG00000099942	0.176561	6.24338	1.72419	0.0914674	0.263982	-5.15433	NOT	CRKL	CRK like proto-oncogene, adaptor protein [Source:HGNC Symbol;Acc:HGNC:2363]
1890	ENSG00000099949	-0.338104	3.96327	-1.72169	0.0919224	0.264594	-5.04275	NOT	LZTR1	leucine zipper like transcription regulator 1 [Source:HGNC Symbol;Acc:HGNC:6742]
1891	ENSG00000099953	-0.679486	0.0536948	-2.11973	0.0395196	0.170835	-3.94267	NOT	MMP11	matrix metallopeptidase 11 [Source:HGNC Symbol;Acc:HGNC:7157]
1892	ENSG00000099954	-0.464003	-2.22063	-1.04488	0.301602	0.515779	-5.31816	NOT	CECR2	CECR2 histone acetyl-lysine reader [Source:HGNC Symbol;Acc:HGNC:1840]
1893	ENSG00000099956	-0.264105	5.9203	-2.41836	0.0196555	0.122157	-3.83689	NOT	SMARCB1	SWI/SNF related, matrix associated, actin dependent regulator of chromatin, subfamily b, member 1 [Source:HGNC Symbol;Acc:HGNC:11103]
1894	ENSG00000099957	-0.131518	-0.768171	-0.405565	0.686964	0.827824	-5.83232	NOT	P2RX6	purinergic receptor P2X 6 [Source:HGNC Symbol;Acc:HGNC:8538]
1895	ENSG00000099958	-0.798809	0.89865	-3.18199	0.00263686	0.0540447	-1.67637	NOT	DERL3	derlin 3 [Source:HGNC Symbol;Acc:HGNC:14236]
1896	ENSG00000099968	-0.137531	5.23036	-1.13677	0.261591	0.475332	-5.93413	NOT	BCL2L13	BCL2 like 13 [Source:HGNC Symbol;Acc:HGNC:17164]
1897	ENSG00000099974	0.0692496	0.8472	0.332831	0.740792	0.862737	-6.01963	NOT	DDTL	D-dopachrome tautomerase like [Source:HGNC Symbol;Acc:HGNC:33446]
9190	ENSG00000163464	3.41338	3.86979	3.38216	0.00148745	0.0435969	-1.31908	UP	CXCR1	C-X-C motif chemokine receptor 1 [Source:HGNC Symbol;Acc:HGNC:6026]
1899	ENSG00000099991	-0.303745	7.68149	-2.32501	0.0245916	0.135146	-4.03527	NOT	CABIN1	calcineurin binding protein 1 [Source:HGNC Symbol;Acc:HGNC:24187]
1900	ENSG00000099992	-0.0429001	4.73368	-0.325691	0.746152	0.865478	-6.49087	NOT	TBC1D10A	TBC1 domain family member 10A [Source:HGNC Symbol;Acc:HGNC:23609]
1901	ENSG00000099994	-0.205476	0.737598	-0.751666	0.456125	0.657198	-5.79182	NOT	SUSD2	sushi domain containing 2 [Source:HGNC Symbol;Acc:HGNC:30667]
1902	ENSG00000099995	-0.0336853	7.25089	-0.376989	0.707935	0.841064	-6.52717	NOT	SF3A1	splicing factor 3a subunit 1 [Source:HGNC Symbol;Acc:HGNC:10765]
6329	ENSG00000137801	3.39928	2.64088	4.21587	0.00011684	0.014498	1.0965	UP	THBS1	thrombospondin 1 [Source:HGNC Symbol;Acc:HGNC:11785]
1904	ENSG00000099999	-0.157199	2.7826	-1.30534	0.198344	0.405653	-5.49915	NOT	RNF215	ring finger protein 215 [Source:HGNC Symbol;Acc:HGNC:33434]
1905	ENSG00000100012	0.898779	-0.827402	1.50799	0.138475	0.330946	-4.85084	NOT	SEC14L3	SEC14 like lipid binding 3 [Source:HGNC Symbol;Acc:HGNC:18655]
1906	ENSG00000100023	-0.400086	6.18503	-3.14213	0.00294909	0.0566469	-2.12304	NOT	PPIL2	peptidylprolyl isomerase like 2 [Source:HGNC Symbol;Acc:HGNC:9261]
3843	ENSG00000115590	3.3716	4.20993	3.42607	0.00130899	0.0422104	-1.2279	UP	IL1R2	interleukin 1 receptor type 2 [Source:HGNC Symbol;Acc:HGNC:5994]
1908	ENSG00000100027	-0.101455	4.3866	-0.571942	0.570178	0.744594	-6.35323	NOT	YPEL1	yippee like 1 [Source:HGNC Symbol;Acc:HGNC:12845]
1909	ENSG00000100029	-0.324678	5.31211	-2.12133	0.0393774	0.170528	-4.42675	NOT	PES1	pescadillo ribosomal biogenesis factor 1 [Source:HGNC Symbol;Acc:HGNC:8848]
1910	ENSG00000100030	-0.16227	7.86411	-1.2086	0.233063	0.444176	-5.87227	NOT	MAPK1	mitogen-activated protein kinase 1 [Source:HGNC Symbol;Acc:HGNC:6871]
1911	ENSG00000100034	-0.34402	7.32161	-2.29013	0.0267036	0.141017	-4.10984	NOT	PPM1F	protein phosphatase, Mg2+/Mn2+ dependent 1F [Source:HGNC Symbol;Acc:HGNC:19388]
1912	ENSG00000100036	-0.101433	1.6853	-0.536921	0.59394	0.763042	-6.03921	NOT	SLC35E4	solute carrier family 35 member E4 [Source:HGNC Symbol;Acc:HGNC:17058]
1913	ENSG00000100038	-0.438565	1.77872	-1.50409	0.139472	0.332455	-5.11447	NOT	TOP3B	DNA topoisomerase III beta [Source:HGNC Symbol;Acc:HGNC:11993]
1914	ENSG00000100053	-0.828475	-2.29097	-2.47769	0.0170021	0.114538	-3.14659	NOT	CRYBB3	crystallin beta B3 [Source:HGNC Symbol;Acc:HGNC:2400]
1915	ENSG00000100055	0.176337	8.8272	1.28189	0.20638	0.415044	-5.77279	NOT	CYTH4	cytohesin 4 [Source:HGNC Symbol;Acc:HGNC:9505]
1916	ENSG00000100056	0.12812	5.5667	0.644009	0.522805	0.709783	-6.37808	NOT	ESS2	ess-2 splicing factor homolog [Source:HGNC Symbol;Acc:HGNC:16817]
1917	ENSG00000100058	0.00517131	4.41281	0.0425618	0.966237	0.984431	-6.51694	NOT	CRYBB2P1	crystallin beta B2 pseudogene 1 [Source:HGNC Symbol;Acc:HGNC:2399]
1918	ENSG00000100060	-0.749312	7.06111	-2.82716	0.00695818	0.0790998	-2.90955	NOT	MFNG	MFNG O-fucosylpeptide 3-beta-N-acetylglucosaminyltransferase [Source:HGNC Symbol;Acc:HGNC:7038]
1919	ENSG00000100065	-0.801228	-2.47875	-2.10918	0.0404668	0.172011	-3.84051	NOT	CARD10	caspase recruitment domain family member 10 [Source:HGNC Symbol;Acc:HGNC:16422]
1920	ENSG00000100068	0.2848	5.75906	1.63573	0.108801	0.28864	-5.2868	NOT	LRP5L	LDL receptor related protein 5 like [Source:HGNC Symbol;Acc:HGNC:25323]
1921	ENSG00000100075	-0.416146	5.09184	-2.32502	0.024591	0.135146	-4.00884	NOT	SLC25A1	solute carrier family 25 member 1 [Source:HGNC Symbol;Acc:HGNC:10979]
1922	ENSG00000100077	-0.0576912	6.88677	-0.329692	0.743147	0.863619	-6.54541	NOT	GRK3	G protein-coupled receptor kinase 3 [Source:HGNC Symbol;Acc:HGNC:290]
1923	ENSG00000100079	-0.508293	6.00955	-1.89981	0.0638102	0.217587	-4.85308	NOT	LGALS2	galectin 2 [Source:HGNC Symbol;Acc:HGNC:6562]
1924	ENSG00000100083	0.168247	7.0572	1.32669	0.191234	0.396978	-5.73342	NOT	GGA1	golgi associated, gamma adaptin ear containing, ARF binding protein 1 [Source:HGNC Symbol;Acc:HGNC:17842]
1925	ENSG00000100084	-0.104893	4.47916	-0.861717	0.393365	0.604113	-6.15582	NOT	HIRA	histone cell cycle regulator [Source:HGNC Symbol;Acc:HGNC:4916]
1926	ENSG00000100092	0.438923	2.8261	1.99405	0.0521631	0.195764	-4.44094	NOT	SH3BP1	SH3 domain binding protein 1 [Source:HGNC Symbol;Acc:HGNC:10824]
1927	ENSG00000100095	-0.407431	1.88557	-1.83187	0.073526	0.234333	-4.62225	NOT	SEZ6L	seizure related 6 homolog like [Source:HGNC Symbol;Acc:HGNC:10763]
1928	ENSG00000100097	-0.353825	7.49803	-1.69343	0.0972141	0.272284	-5.2019	NOT	LGALS1	galectin 1 [Source:HGNC Symbol;Acc:HGNC:6561]
1929	ENSG00000100099	-0.0275665	5.57427	-0.241403	0.810328	0.903678	-6.55624	NOT	HPS4	HPS4 biogenesis of lysosomal organelles complex 3 subunit 2 [Source:HGNC Symbol;Acc:HGNC:15844]
1930	ENSG00000100100	-0.053732	8.75233	-0.351118	0.727121	0.853049	-6.52086	NOT	PIK3IP1	phosphoinositide-3-kinase interacting protein 1 [Source:HGNC Symbol;Acc:HGNC:24942]
1931	ENSG00000100101	-0.318153	0.163482	-1.43954	0.156846	0.354876	-5.02804	NOT	Z83844.1	novel transcript
1932	ENSG00000100104	0.23333	3.02355	1.16682	0.249365	0.462126	-5.69006	NOT	SRRD	SRR1 domain containing [Source:HGNC Symbol;Acc:HGNC:33910]
1933	ENSG00000100105	-0.410255	4.40829	-2.66256	0.0106853	0.0933481	-3.22897	NOT	PATZ1	POZ/BTB and AT hook containing zinc finger 1 [Source:HGNC Symbol;Acc:HGNC:13071]
1934	ENSG00000100106	-0.465651	6.41685	-2.57486	0.0133504	0.103082	-3.49743	NOT	TRIOBP	TRIO and F-actin binding protein [Source:HGNC Symbol;Acc:HGNC:17009]
1935	ENSG00000100109	0.0664078	5.00534	0.536934	0.593931	0.763042	-6.41697	NOT	TFIP11	tuftelin interacting protein 11 [Source:HGNC Symbol;Acc:HGNC:17165]
1936	ENSG00000100116	-0.544286	-0.198698	-1.67341	0.101113	0.277834	-4.66887	NOT	GCAT	glycine C-acetyltransferase [Source:HGNC Symbol;Acc:HGNC:4188]
1937	ENSG00000100122	-0.747411	-1.20137	-2.43601	0.0188295	0.119725	-3.26313	NOT	CRYBB1	crystallin beta B1 [Source:HGNC Symbol;Acc:HGNC:2397]
1938	ENSG00000100124	-0.0984413	3.77203	-0.721981	0.474003	0.670829	-6.19424	NOT	ANKRD54	ankyrin repeat domain 54 [Source:HGNC Symbol;Acc:HGNC:25185]
1939	ENSG00000100129	-0.457508	7.34845	-3.1432	0.00294028	0.0566469	-2.12051	NOT	EIF3L	eukaryotic translation initiation factor 3 subunit L [Source:HGNC Symbol;Acc:HGNC:18138]
1940	ENSG00000100138	-0.22811	6.47842	-1.74345	0.0880137	0.258317	-5.12402	NOT	SNU13	small nuclear ribonucleoprotein 13 [Source:HGNC Symbol;Acc:HGNC:7819]
1941	ENSG00000100139	-0.43293	4.82793	-3.7293	0.000530645	0.0290318	-0.491304	NOT	MICALL1	MICAL like 1 [Source:HGNC Symbol;Acc:HGNC:29804]
1942	ENSG00000100142	-0.18131	4.49646	-1.1762	0.245635	0.458378	-5.84432	NOT	POLR2F	RNA polymerase II subunit F [Source:HGNC Symbol;Acc:HGNC:9193]
1943	ENSG00000100147	0.506939	3.6833	2.67662	0.0103065	0.0918587	-3.12724	NOT	CCDC134	coiled-coil domain containing 134 [Source:HGNC Symbol;Acc:HGNC:26185]
1944	ENSG00000100151	-0.377266	3.8655	-1.61499	0.113231	0.295551	-5.19998	NOT	PICK1	protein interacting with PRKCA 1 [Source:HGNC Symbol;Acc:HGNC:9394]
1945	ENSG00000100154	0.350159	0.845487	0.817163	0.418096	0.624604	-5.74809	NOT	TTC28	tetratricopeptide repeat domain 28 [Source:HGNC Symbol;Acc:HGNC:29179]
1946	ENSG00000100156	-0.272001	-0.572964	-0.854992	0.397038	0.607116	-5.58384	NOT	SLC16A8	solute carrier family 16 member 8 [Source:HGNC Symbol;Acc:HGNC:16270]
1947	ENSG00000100162	0.110443	0.742401	0.361012	0.719762	0.848463	-5.9966	NOT	CENPM	centromere protein M [Source:HGNC Symbol;Acc:HGNC:18352]
1948	ENSG00000100167	-0.883818	-1.90138	-2.90453	0.00566039	0.0720596	-2.24075	NOT	SEPTIN3	septin 3 [Source:HGNC Symbol;Acc:HGNC:10750]
1949	ENSG00000100181	-0.460566	2.1455	-1.45769	0.151798	0.349161	-5.22311	NOT	TPTEP1	TPTE pseudogene 1 [Source:HGNC Symbol;Acc:HGNC:43648]
1950	ENSG00000100196	0.856813	1.22799	2.5583	0.0139172	0.105214	-3.14525	NOT	KDELR3	KDEL endoplasmic reticulum protein retention receptor 3 [Source:HGNC Symbol;Acc:HGNC:6306]
1951	ENSG00000100201	-0.438874	9.72034	-1.86717	0.0683318	0.225121	-4.88387	NOT	DDX17	DEAD-box helicase 17 [Source:HGNC Symbol;Acc:HGNC:2740]
1952	ENSG00000100206	-0.119859	-1.71209	-0.371511	0.711982	0.843792	-5.78329	NOT	DMC1	DNA meiotic recombinase 1 [Source:HGNC Symbol;Acc:HGNC:2927]
1953	ENSG00000100207	-0.056494	6.20014	-0.540112	0.591755	0.761447	-6.45182	NOT	TCF20	transcription factor 20 [Source:HGNC Symbol;Acc:HGNC:11631]
1954	ENSG00000100209	-0.163464	2.48746	-0.895791	0.375082	0.587232	-5.89463	NOT	HSCB	HscB mitochondrial iron-sulfur cluster cochaperone [Source:HGNC Symbol;Acc:HGNC:28913]
1955	ENSG00000100211	-0.266728	1.85523	-0.934137	0.355167	0.56841	-5.78041	NOT	CBY1	chibby family member 1, beta catenin antagonist [Source:HGNC Symbol;Acc:HGNC:1307]
1956	ENSG00000100216	-0.225363	4.97601	-1.44053	0.156569	0.354488	-5.54348	NOT	TOMM22	translocase of outer mitochondrial membrane 22 [Source:HGNC Symbol;Acc:HGNC:18002]
1957	ENSG00000100218	0.784115	-0.307785	2.08694	0.042529	0.17635	-3.9667	NOT	RSPH14	radial spoke head 14 homolog [Source:HGNC Symbol;Acc:HGNC:13437]
1958	ENSG00000100219	0.0321242	6.82535	0.205053	0.838446	0.918933	-6.57901	NOT	XBP1	X-box binding protein 1 [Source:HGNC Symbol;Acc:HGNC:12801]
1959	ENSG00000100220	-0.221096	5.30709	-1.77059	0.0833319	0.250807	-5.05708	NOT	RTCB	RNA 2',3'-cyclic phosphate and 5'-OH ligase [Source:HGNC Symbol;Acc:HGNC:26935]
1960	ENSG00000100221	0.382456	7.00737	2.21961	0.031474	0.152714	-4.2552	NOT	JOSD1	Josephin domain containing 1 [Source:HGNC Symbol;Acc:HGNC:28953]
1961	ENSG00000100225	-0.252514	7.92233	-1.02044	0.31292	0.526698	-6.07621	NOT	FBXO7	F-box protein 7 [Source:HGNC Symbol;Acc:HGNC:13586]
1962	ENSG00000100226	0.587032	7.53349	3.09336	0.00337865	0.0590672	-2.24832	NOT	GTPBP1	GTP binding protein 1 [Source:HGNC Symbol;Acc:HGNC:4669]
1963	ENSG00000100227	-0.0209553	6.76261	-0.250992	0.802951	0.899758	-6.56853	NOT	POLDIP3	DNA polymerase delta interacting protein 3 [Source:HGNC Symbol;Acc:HGNC:23782]
1964	ENSG00000100228	0.680216	1.11087	2.02539	0.0487204	0.189612	-4.19361	NOT	RAB36	RAB36, member RAS oncogene family [Source:HGNC Symbol;Acc:HGNC:9775]
1965	ENSG00000100239	-0.445705	7.65954	-3.09754	0.00333972	0.0588869	-2.23586	NOT	PPP6R2	protein phosphatase 6 regulatory subunit 2 [Source:HGNC Symbol;Acc:HGNC:19253]
1966	ENSG00000100241	-0.482558	7.97936	-2.96309	0.00483217	0.0676083	-2.572	NOT	SBF1	SET binding factor 1 [Source:HGNC Symbol;Acc:HGNC:10542]
1967	ENSG00000100242	-0.361538	6.60904	-2.21669	0.0316872	0.153309	-4.2607	NOT	SUN2	Sad1 and UNC84 domain containing 2 [Source:HGNC Symbol;Acc:HGNC:14210]
1968	ENSG00000100243	-0.36739	6.52522	-3.02435	0.0040879	0.0637836	-2.42526	NOT	CYB5R3	cytochrome b5 reductase 3 [Source:HGNC Symbol;Acc:HGNC:2873]
1969	ENSG00000100253	-0.605202	-1.8339	-1.67588	0.100626	0.27755	-4.56915	NOT	MIOX	myo-inositol oxygenase [Source:HGNC Symbol;Acc:HGNC:14522]
1970	ENSG00000100258	-0.377145	7.36532	-2.44065	0.0186177	0.119109	-3.79218	NOT	LMF2	lipase maturation factor 2 [Source:HGNC Symbol;Acc:HGNC:25096]
1971	ENSG00000100263	-0.208813	3.45036	-1.49911	0.140756	0.333991	-5.32373	NOT	RHBDD3	rhomboid domain containing 3 [Source:HGNC Symbol;Acc:HGNC:1308]
1972	ENSG00000100266	0.551219	7.19192	3.35352	0.00161607	0.0454387	-1.56814	NOT	PACSIN2	protein kinase C and casein kinase substrate in neurons 2 [Source:HGNC Symbol;Acc:HGNC:8571]
1973	ENSG00000100271	-0.439758	1.50262	-2.9195	0.00543695	0.0705476	-2.35729	NOT	TTLL1	tubulin tyrosine ligase like 1 [Source:HGNC Symbol;Acc:HGNC:1312]
1974	ENSG00000100276	-0.766561	-0.140784	-2.24173	0.0299023	0.148996	-3.70008	NOT	RASL10A	RAS like family 10 member A [Source:HGNC Symbol;Acc:HGNC:16954]
1975	ENSG00000100280	-0.606511	6.92643	-4.15656	0.000141035	0.0151427	0.724414	NOT	AP1B1	adaptor related protein complex 1 subunit beta 1 [Source:HGNC Symbol;Acc:HGNC:554]
1976	ENSG00000100281	0.403596	4.99762	2.01538	0.0497978	0.19152	-4.61144	NOT	HMGXB4	HMG-box containing 4 [Source:HGNC Symbol;Acc:HGNC:5003]
1977	ENSG00000100284	0.372327	7.73734	2.03805	0.0473868	0.186611	-4.60281	NOT	TOM1	target of myb1 membrane trafficking protein [Source:HGNC Symbol;Acc:HGNC:11982]
1978	ENSG00000100285	-0.681737	0.546091	-2.44821	0.018277	0.117803	-3.3362	NOT	NEFH	neurofilament heavy [Source:HGNC Symbol;Acc:HGNC:7737]
1979	ENSG00000100288	-0.527547	0.80924	-1.74529	0.0876896	0.258066	-4.64877	NOT	CHKB	choline kinase beta [Source:HGNC Symbol;Acc:HGNC:1938]
1980	ENSG00000100290	0.320835	1.87938	1.46554	0.149655	0.346228	-5.17167	NOT	BIK	BCL2 interacting killer [Source:HGNC Symbol;Acc:HGNC:1051]
1981	ENSG00000100292	-0.148147	6.54952	-0.663971	0.510062	0.700152	-6.37963	NOT	HMOX1	heme oxygenase 1 [Source:HGNC Symbol;Acc:HGNC:5013]
1982	ENSG00000100294	0.326203	2.82292	1.56642	0.124185	0.311393	-5.14409	NOT	MCAT	malonyl-CoA-acyl carrier protein transacylase [Source:HGNC Symbol;Acc:HGNC:29622]
1983	ENSG00000100296	0.00539568	4.43237	0.033232	0.973635	0.987309	-6.51921	NOT	THOC5	THO complex 5 [Source:HGNC Symbol;Acc:HGNC:19074]
1984	ENSG00000100297	-0.339144	5.94384	-2.29525	0.0263838	0.140136	-4.09587	NOT	MCM5	minichromosome maintenance complex component 5 [Source:HGNC Symbol;Acc:HGNC:6948]
1985	ENSG00000100298	-0.177225	1.92741	-0.886073	0.380241	0.592001	-5.83035	NOT	APOBEC3H	apolipoprotein B mRNA editing enzyme catalytic subunit 3H [Source:HGNC Symbol;Acc:HGNC:24100]
1986	ENSG00000100299	-0.488893	6.68381	-2.52549	0.0151056	0.10937	-3.60834	NOT	ARSA	arylsulfatase A [Source:HGNC Symbol;Acc:HGNC:713]
1987	ENSG00000100300	-0.654028	7.79404	-2.70546	0.00956818	0.0891918	-3.19363	NOT	TSPO	translocator protein [Source:HGNC Symbol;Acc:HGNC:1158]
1988	ENSG00000100302	0.986011	-1.89007	1.76969	0.0834838	0.25111	-4.41899	NOT	RASD2	RASD family member 2 [Source:HGNC Symbol;Acc:HGNC:18229]
1989	ENSG00000100304	-0.695781	4.55256	-3.59708	0.000789976	0.0347562	-0.847987	NOT	TTLL12	tubulin tyrosine ligase like 12 [Source:HGNC Symbol;Acc:HGNC:28974]
1990	ENSG00000100307	-0.352138	6.50023	-2.52632	0.0150743	0.109258	-3.60646	NOT	CBX7	chromobox 7 [Source:HGNC Symbol;Acc:HGNC:1557]
1991	ENSG00000100311	-0.346707	0.893817	-1.21156	0.231939	0.44308	-5.38331	NOT	PDGFB	platelet derived growth factor subunit B [Source:HGNC Symbol;Acc:HGNC:8800]
1992	ENSG00000100314	0.409042	-1.38864	1.26507	0.21229	0.421044	-5.12484	NOT	CABP7	calcium binding protein 7 [Source:HGNC Symbol;Acc:HGNC:20834]
1993	ENSG00000100316	-0.414631	11.0364	-2.07178	0.0439859	0.179637	-4.4877	NOT	RPL3	ribosomal protein L3 [Source:HGNC Symbol;Acc:HGNC:10332]
1994	ENSG00000100319	-0.0703897	3.4327	-0.446428	0.657407	0.807372	-6.31203	NOT	ZMAT5	zinc finger matrin-type 5 [Source:HGNC Symbol;Acc:HGNC:28046]
1995	ENSG00000100320	-0.533465	4.00648	-2.8419	0.0066914	0.0775498	-2.77562	NOT	RBFOX2	RNA binding fox-1 homolog 2 [Source:HGNC Symbol;Acc:HGNC:9906]
1996	ENSG00000100321	-0.53072	4.35566	-1.97924	0.0538623	0.198859	-4.63611	NOT	SYNGR1	synaptogyrin 1 [Source:HGNC Symbol;Acc:HGNC:11498]
1997	ENSG00000100324	-0.56017	5.38207	-2.99774	0.00439687	0.0654284	-2.47385	NOT	TAB1	TGF-beta activated kinase 1 (MAP3K7) binding protein 1 [Source:HGNC Symbol;Acc:HGNC:18157]
1998	ENSG00000100325	-0.288241	6.77815	-1.59828	0.116908	0.301017	-5.35336	NOT	ASCC2	activating signal cointegrator 1 complex subunit 2 [Source:HGNC Symbol;Acc:HGNC:24103]
9051	ENSG00000162747	3.36457	5.52718	2.72191	0.00916907	0.0876321	-3.09192	UP	FCGR3B	Fc fragment of IgG receptor IIIb [Source:HGNC Symbol;Acc:HGNC:3620]
[truncated: 18,689 more rows]

## Sheet: TCMR_DEGs_limma
	ensembl_gene_id	logFC	AveExpr	t	P.Value	adj.P.Val	B	change	external_gene_name	description
1	ENSG00000000003	-0.962876	-1.75437	-2.58216	0.0136439	0.0857199	-2.95841	NOT	TSPAN6	tetraspanin 6 [Source:HGNC Symbol;Acc:HGNC:11858]
2	ENSG00000000419	0.414101	4.29129	1.97228	0.0556209	0.179572	-4.64616	NOT	DPM1	dolichyl-phosphate mannosyltransferase subunit 1, catalytic [Source:HGNC Symbol;Acc:HGNC:3005]
3	ENSG00000000457	-0.278387	3.8947	-2.28921	0.0275033	0.121415	-3.99851	NOT	SCYL3	SCY1 like pseudokinase 3 [Source:HGNC Symbol;Acc:HGNC:19285]
4	ENSG00000000460	-0.239626	3.40495	-1.3345	0.189698	0.368384	-5.52858	NOT	C1orf112	chromosome 1 open reading frame 112 [Source:HGNC Symbol;Acc:HGNC:25565]
5	ENSG00000000938	-0.199461	9.80716	-1.18911	0.24151	0.426465	-5.862	NOT	FGR	FGR proto-oncogene, Src family tyrosine kinase [Source:HGNC Symbol;Acc:HGNC:3697]
6	ENSG00000000971	-0.394727	2.109	-1.42219	0.162835	0.336619	-5.2492	NOT	CFH	complement factor H [Source:HGNC Symbol;Acc:HGNC:4883]
7	ENSG00000001036	-0.563344	2.33541	-2.641	0.0117883	0.0790651	-3.08657	NOT	FUCA2	alpha-L-fucosidase 2 [Source:HGNC Symbol;Acc:HGNC:4008]
8	ENSG00000001084	-0.338584	4.37821	-2.09352	0.0427818	0.154825	-4.42436	NOT	GCLC	glutamate-cysteine ligase catalytic subunit [Source:HGNC Symbol;Acc:HGNC:4311]
9	ENSG00000001167	0.0107398	4.20061	0.0813904	0.935543	0.963727	-6.48966	NOT	NFYA	nuclear transcription factor Y subunit alpha [Source:HGNC Symbol;Acc:HGNC:7804]
10	ENSG00000001460	0.0831425	0.216467	0.319525	0.751016	0.852462	-5.93991	NOT	STPG1	sperm tail PG-rich repeat containing 1 [Source:HGNC Symbol;Acc:HGNC:28070]
11	ENSG00000001461	-0.384657	5.23969	-2.09628	0.0425226	0.154362	-4.47385	NOT	NIPAL3	NIPA like domain containing 3 [Source:HGNC Symbol;Acc:HGNC:25233]
12	ENSG00000001497	-0.258256	5.4416	-1.84796	0.0721199	0.205935	-4.93064	NOT	LAS1L	LAS1 like ribosome biogenesis factor [Source:HGNC Symbol;Acc:HGNC:25726]
13	ENSG00000001561	-0.0438461	3.84237	-0.215667	0.830359	0.903108	-6.42989	NOT	ENPP4	ectonucleotide pyrophosphatase/phosphodiesterase 4 [Source:HGNC Symbol;Acc:HGNC:3359]
20685	ENSG00000286263	1.67418	0.79084	4.55543	4.94257e-05	0.00764328	1.92751	UP	AL391832.4	novel transcript
15	ENSG00000001626	0.600445	-2.63967	1.37314	0.177466	0.354962	-4.93147	NOT	CFTR	CF transmembrane conductance regulator [Source:HGNC Symbol;Acc:HGNC:1884]
16	ENSG00000001629	-0.207055	5.43033	-1.08674	0.28375	0.471181	-5.99159	NOT	ANKIB1	ankyrin repeat and IBR domain containing 1 [Source:HGNC Symbol;Acc:HGNC:22215]
17	ENSG00000002016	-0.155598	4.03774	-1.14087	0.260806	0.446791	-5.83324	NOT	RAD52	RAD52 homolog, DNA repair protein [Source:HGNC Symbol;Acc:HGNC:9824]
18	ENSG00000002330	0.270277	1.41354	0.923326	0.361454	0.549446	-5.72229	NOT	BAD	BCL2 associated agonist of cell death [Source:HGNC Symbol;Acc:HGNC:936]
19	ENSG00000002549	-0.412337	4.85961	-2.05172	0.0468797	0.163158	-4.53719	NOT	LAP3	leucine aminopeptidase 3 [Source:HGNC Symbol;Acc:HGNC:18449]
20	ENSG00000002587	-0.0985618	-0.0833248	-0.324476	0.747293	0.850052	-5.90591	NOT	HS3ST1	heparan sulfate-glucosamine 3-sulfotransferase 1 [Source:HGNC Symbol;Acc:HGNC:5194]
20682	ENSG00000286256	2.60841	0.119922	3.7473	0.000572213	0.0216726	-0.269869	UP	AC084871.4	novel transcript, antisense to ACSL1
22	ENSG00000002745	-0.729218	-0.157036	-2.31585	0.0258538	0.116847	-3.55191	NOT	WNT16	Wnt family member 16 [Source:HGNC Symbol;Acc:HGNC:16267]
23	ENSG00000002746	0.879528	-2.35349	1.69365	0.0982194	0.247753	-4.51376	NOT	HECW1	HECT, C2 and WW domain containing E3 ubiquitin protein ligase 1 [Source:HGNC Symbol;Acc:HGNC:22195]
24	ENSG00000002834	0.36249	6.21866	1.76248	0.0857394	0.228646	-5.09297	NOT	LASP1	LIM and SH3 protein 1 [Source:HGNC Symbol;Acc:HGNC:6513]
25	ENSG00000002919	-0.117629	5.30653	-0.899446	0.373876	0.560557	-6.16956	NOT	SNX11	sorting nexin 11 [Source:HGNC Symbol;Acc:HGNC:14975]
26	ENSG00000002933	-0.43262	4.45976	-0.74564	0.460307	0.63743	-6.23536	NOT	TMEM176A	transmembrane protein 176A [Source:HGNC Symbol;Acc:HGNC:24930]
27	ENSG00000003056	-0.556907	6.28839	-2.8796	0.00640538	0.0586144	-2.81384	NOT	M6PR	mannose-6-phosphate receptor, cation dependent [Source:HGNC Symbol;Acc:HGNC:6752]
28	ENSG00000003096	0.480304	-0.882568	1.48773	0.144776	0.313228	-4.86956	NOT	KLHL13	kelch like family member 13 [Source:HGNC Symbol;Acc:HGNC:22931]
29	ENSG00000003147	-0.19166	2.35341	-0.72062	0.475394	0.650868	-6.00117	NOT	ICA1	islet cell autoantigen 1 [Source:HGNC Symbol;Acc:HGNC:5343]
30	ENSG00000003249	-0.377446	0.672378	-0.912691	0.366952	0.554277	-5.63817	NOT	DBNDD1	dysbindin domain containing 1 [Source:HGNC Symbol;Acc:HGNC:28455]
31	ENSG00000003393	-0.0405036	4.06776	-0.257254	0.79832	0.882635	-6.44573	NOT	ALS2	alsin Rho guanine nucleotide exchange factor ALS2 [Source:HGNC Symbol;Acc:HGNC:443]
32	ENSG00000003400	-0.270765	6.04016	-2.12736	0.0396979	0.148729	-4.43892	NOT	CASP10	caspase 10 [Source:HGNC Symbol;Acc:HGNC:1500]
33	ENSG00000003402	-0.387684	8.58806	-2.39912	0.021257	0.105803	-3.88269	NOT	CFLAR	CASP8 and FADD like apoptosis regulator [Source:HGNC Symbol;Acc:HGNC:1876]
34	ENSG00000003436	0.514065	-3.4579	1.30163	0.200598	0.381182	-4.98445	NOT	TFPI	tissue factor pathway inhibitor [Source:HGNC Symbol;Acc:HGNC:11760]
35	ENSG00000003509	0.188331	3.97353	1.27791	0.208753	0.391357	-5.66967	NOT	NDUFAF7	NADH:ubiquinone oxidoreductase complex assembly factor 7 [Source:HGNC Symbol;Acc:HGNC:28816]
36	ENSG00000003756	-0.228049	6.89112	-2.00087	0.052325	0.173327	-4.68051	NOT	RBM5	RNA binding motif protein 5 [Source:HGNC Symbol;Acc:HGNC:9902]
37	ENSG00000003987	-0.114535	2.64613	-0.884765	0.381647	0.568139	-5.91322	NOT	MTMR7	myotubularin related protein 7 [Source:HGNC Symbol;Acc:HGNC:7454]
20681	ENSG00000286248	-1.1159	0.353312	-3.52023	0.00110485	0.0293146	-0.853325	DOWN	AC069209.2	novel transcript, antisense to P2RX7
39	ENSG00000004139	-0.30552	2.0722	-1.34358	0.186765	0.36505	-5.34739	NOT	SARM1	sterile alpha and TIR motif containing 1 [Source:HGNC Symbol;Acc:HGNC:17074]
40	ENSG00000004142	-0.395459	5.25573	-2.57577	0.0138607	0.0862787	-3.48887	NOT	POLDIP2	DNA polymerase delta interacting protein 2 [Source:HGNC Symbol;Acc:HGNC:23781]
41	ENSG00000004399	-0.716154	7.03237	-4.66113	3.55414e-05	0.00651761	2.07348	NOT	PLXND1	plexin D1 [Source:HGNC Symbol;Acc:HGNC:9107]
20644	ENSG00000286082	1.21582	-1.23002	2.75384	0.00886406	0.0694709	-2.61512	UP	AL133493.1	novel transcript
43	ENSG00000004468	-0.402729	4.43162	-1.9592	0.0571877	0.182472	-4.67457	NOT	CD38	CD38 molecule [Source:HGNC Symbol;Acc:HGNC:1667]
44	ENSG00000004487	-0.252512	1.25503	-0.907423	0.369696	0.556909	-5.71176	NOT	KDM1A	lysine demethylase 1A [Source:HGNC Symbol;Acc:HGNC:29079]
45	ENSG00000004534	-0.320973	7.32975	-2.38666	0.0218942	0.107408	-3.92146	NOT	RBM6	RNA binding motif protein 6 [Source:HGNC Symbol;Acc:HGNC:9903]
46	ENSG00000004660	0.942635	4.92471	3.45895	0.00131581	0.0309974	-1.31785	NOT	CAMKK1	calcium/calmodulin dependent protein kinase kinase 1 [Source:HGNC Symbol;Acc:HGNC:1469]
47	ENSG00000004700	-0.191521	4.71823	-0.871526	0.388743	0.575185	-6.15893	NOT	RECQL	RecQ like helicase [Source:HGNC Symbol;Acc:HGNC:9948]
48	ENSG00000004766	-0.162725	4.48605	-0.85197	0.399376	0.584743	-6.15744	NOT	VPS50	VPS50 subunit of EARP/GARPII complex [Source:HGNC Symbol;Acc:HGNC:25956]
49	ENSG00000004777	-0.15069	3.15399	-0.884346	0.381871	0.568431	-5.97941	NOT	ARHGAP33	Rho GTPase activating protein 33 [Source:HGNC Symbol;Acc:HGNC:23085]
50	ENSG00000004779	-0.435776	4.48157	-2.52089	0.0158577	0.09186	-3.56279	NOT	NDUFAB1	NADH:ubiquinone oxidoreductase subunit AB1 [Source:HGNC Symbol;Acc:HGNC:7694]
51	ENSG00000004799	-0.0670682	3.53895	-0.139749	0.889569	0.938671	-6.40657	NOT	PDK4	pyruvate dehydrogenase kinase 4 [Source:HGNC Symbol;Acc:HGNC:8812]
52	ENSG00000004809	-0.715146	1.32155	-2.34921	0.0239145	0.112142	-3.5999	NOT	SLC22A16	solute carrier family 22 member 16 [Source:HGNC Symbol;Acc:HGNC:20302]
53	ENSG00000004838	-0.0532033	-2.86262	-0.15329	0.878951	0.933123	-5.76319	NOT	ZMYND10	zinc finger MYND-type containing 10 [Source:HGNC Symbol;Acc:HGNC:19412]
54	ENSG00000004846	-0.205706	-2.74251	-0.503631	0.617323	0.760488	-5.66207	NOT	ABCB5	ATP binding cassette subfamily B member 5 [Source:HGNC Symbol;Acc:HGNC:46]
20629	ENSG00000286022	2.83533	-1.15084	4.74291	2.75068e-05	0.00572904	2.38811	UP	AL121899.2	novel protein
56	ENSG00000004866	0.0768252	2.80404	0.436656	0.664743	0.793936	-6.22613	NOT	ST7	suppression of tumorigenicity 7 [Source:HGNC Symbol;Acc:HGNC:11351]
57	ENSG00000004897	0.155219	5.75817	1.40294	0.168462	0.344097	-5.6229	NOT	CDC27	cell division cycle 27 [Source:HGNC Symbol;Acc:HGNC:1728]
58	ENSG00000004939	1.43505	3.50194	1.18626	0.242621	0.427661	-5.72491	NOT	SLC4A1	solute carrier family 4 member 1 (Diego blood group) [Source:HGNC Symbol;Acc:HGNC:11027]
59	ENSG00000004961	0.22192	3.46899	1.74303	0.0891238	0.233723	-4.95094	NOT	HCCS	holocytochrome c synthase [Source:HGNC Symbol;Acc:HGNC:4837]
60	ENSG00000004975	-0.23817	4.85015	-1.89936	0.0648502	0.195182	-4.81302	NOT	DVL2	dishevelled segment polarity protein 2 [Source:HGNC Symbol;Acc:HGNC:3086]
61	ENSG00000005001	0.438266	-0.590378	0.932392	0.356808	0.544943	-5.50225	NOT	PRSS22	serine protease 22 [Source:HGNC Symbol;Acc:HGNC:14368]
62	ENSG00000005007	-0.285895	7.15766	-2.26588	0.0290239	0.125353	-4.1705	NOT	UPF1	UPF1 RNA helicase and ATPase [Source:HGNC Symbol;Acc:HGNC:9962]
63	ENSG00000005020	-0.210695	6.08108	-0.981675	0.332246	0.520393	-6.11472	NOT	SKAP2	src kinase associated phosphoprotein 2 [Source:HGNC Symbol;Acc:HGNC:15687]
64	ENSG00000005022	-0.456379	7.0231	-2.79953	0.00788389	0.0654527	-3.0055	NOT	SLC25A5	solute carrier family 25 member 5 [Source:HGNC Symbol;Acc:HGNC:10991]
65	ENSG00000005059	-0.142765	6.80273	-1.11819	0.270251	0.456856	-5.97892	NOT	MCUB	mitochondrial calcium uniporter dominant negative subunit beta [Source:HGNC Symbol;Acc:HGNC:26076]
66	ENSG00000005075	0.142616	5.04541	0.683316	0.498403	0.670165	-6.32763	NOT	POLR2J	RNA polymerase II subunit J [Source:HGNC Symbol;Acc:HGNC:9197]
67	ENSG00000005100	-0.608415	1.7515	-1.52691	0.134766	0.299799	-5.05918	NOT	DHX33	DEAH-box helicase 33 [Source:HGNC Symbol;Acc:HGNC:16718]
68	ENSG00000005102	-0.605763	-0.13846	-2.42317	0.0200739	0.103398	-3.34224	NOT	MEOX1	mesenchyme homeobox 1 [Source:HGNC Symbol;Acc:HGNC:7013]
69	ENSG00000005108	-0.282366	-0.804365	-0.664214	0.510419	0.679566	-5.68325	NOT	THSD7A	thrombospondin type 1 domain containing 7A [Source:HGNC Symbol;Acc:HGNC:22207]
70	ENSG00000005156	0.193336	4.73536	1.63102	0.110849	0.266412	-5.24918	NOT	LIG3	DNA ligase 3 [Source:HGNC Symbol;Acc:HGNC:6600]
71	ENSG00000005175	0.0516151	4.69799	0.41154	0.682905	0.805667	-6.45289	NOT	RPAP3	RNA polymerase II associated protein 3 [Source:HGNC Symbol;Acc:HGNC:26151]
72	ENSG00000005187	-0.053913	0.280393	-0.17487	0.862076	0.922582	-5.97995	NOT	ACSM3	acyl-CoA synthetase medium chain family member 3 [Source:HGNC Symbol;Acc:HGNC:10522]
73	ENSG00000005194	-0.29667	5.03067	-1.87649	0.0680031	0.199909	-4.86239	NOT	CIAPIN1	cytokine induced apoptosis inhibitor 1 [Source:HGNC Symbol;Acc:HGNC:28050]
74	ENSG00000005206	-0.384001	6.35063	-1.83829	0.0735619	0.208387	-4.96537	NOT	SPPL2B	signal peptide peptidase like 2B [Source:HGNC Symbol;Acc:HGNC:30627]
75	ENSG00000005238	-0.0137631	6.16222	-0.0675405	0.946493	0.969674	-6.59332	NOT	FAM214B	family with sequence similarity 214 member B [Source:HGNC Symbol;Acc:HGNC:25666]
76	ENSG00000005243	-0.739366	0.857588	-2.54721	0.0148691	0.0890001	-3.15436	NOT	COPZ2	COPI coat complex subunit zeta 2 [Source:HGNC Symbol;Acc:HGNC:19356]
77	ENSG00000005249	-0.0620835	4.83597	-0.197453	0.844488	0.911293	-6.52677	NOT	PRKAR2B	protein kinase cAMP-dependent type II regulatory subunit beta [Source:HGNC Symbol;Acc:HGNC:9392]
78	ENSG00000005302	-0.351093	6.83197	-2.54238	0.0150464	0.0895417	-3.58946	NOT	MSL3	MSL complex subunit 3 [Source:HGNC Symbol;Acc:HGNC:7370]
79	ENSG00000005339	-0.0544467	8.29102	-0.410258	0.683837	0.806469	-6.50131	NOT	CREBBP	CREB binding protein [Source:HGNC Symbol;Acc:HGNC:2348]
80	ENSG00000005379	-0.581452	6.39234	-2.90155	0.00604779	0.0567219	-2.76208	NOT	TSPOAP1	TSPO associated protein 1 [Source:HGNC Symbol;Acc:HGNC:16831]
81	ENSG00000005381	-0.178754	3.56448	-0.216977	0.829345	0.902528	-6.39083	NOT	MPO	myeloperoxidase [Source:HGNC Symbol;Acc:HGNC:7218]
82	ENSG00000005436	-0.00824376	2.71635	-0.0458584	0.963655	0.979437	-6.3063	NOT	GCFC2	GC-rich sequence DNA-binding factor 2 [Source:HGNC Symbol;Acc:HGNC:1317]
83	ENSG00000005448	-0.126845	3.37315	-0.608666	0.546237	0.706924	-6.2103	NOT	WDR54	WD repeat domain 54 [Source:HGNC Symbol;Acc:HGNC:25770]
84	ENSG00000005469	-0.549834	3.21349	-2.63142	0.0120737	0.0801794	-3.19784	NOT	CROT	carnitine O-octanoyltransferase [Source:HGNC Symbol;Acc:HGNC:2366]
85	ENSG00000005471	-0.248848	1.57152	-0.784161	0.437632	0.6175	-5.85081	NOT	ABCB4	ATP binding cassette subfamily B member 4 [Source:HGNC Symbol;Acc:HGNC:45]
86	ENSG00000005483	0.913162	7.13034	3.19593	0.00274385	0.0412912	-2.03574	NOT	KMT2E	lysine methyltransferase 2E [Source:HGNC Symbol;Acc:HGNC:18541]
87	ENSG00000005486	0.097267	6.10109	0.51026	0.612714	0.757342	-6.4645	NOT	RHBDD2	rhomboid domain containing 2 [Source:HGNC Symbol;Acc:HGNC:23082]
88	ENSG00000005513	-0.628856	0.388878	-2.03881	0.048213	0.165272	-4.10384	NOT	SOX8	SRY-box transcription factor 8 [Source:HGNC Symbol;Acc:HGNC:11203]
89	ENSG00000005700	-0.250238	5.31527	-1.63358	0.110309	0.265686	-5.27386	NOT	IBTK	inhibitor of Bruton tyrosine kinase [Source:HGNC Symbol;Acc:HGNC:17853]
90	ENSG00000005801	-0.388394	4.34993	-2.88629	0.0062943	0.0582107	-2.72133	NOT	ZNF195	zinc finger protein 195 [Source:HGNC Symbol;Acc:HGNC:12986]
91	ENSG00000005810	0.546051	5.22865	1.64516	0.107887	0.261877	-5.25562	NOT	MYCBP2	MYC binding protein 2 [Source:HGNC Symbol;Acc:HGNC:23386]
92	ENSG00000005844	-0.78615	9.12567	-3.66993	0.000717305	0.0244072	-0.764613	NOT	ITGAL	integrin subunit alpha L [Source:HGNC Symbol;Acc:HGNC:6148]
93	ENSG00000005882	-0.727266	2.86894	-3.1007	0.0035572	0.0455798	-2.06245	NOT	PDK2	pyruvate dehydrogenase kinase 2 [Source:HGNC Symbol;Acc:HGNC:8810]
94	ENSG00000005884	-0.670892	1.78952	-3.07821	0.00378001	0.0467638	-2.02547	NOT	ITGA3	integrin subunit alpha 3 [Source:HGNC Symbol;Acc:HGNC:6139]
95	ENSG00000005889	0.3643	5.7474	2.48082	0.017478	0.0970469	-3.71544	NOT	ZFX	zinc finger protein X-linked [Source:HGNC Symbol;Acc:HGNC:12869]
96	ENSG00000005893	-0.0178353	6.7633	-0.125976	0.900391	0.945135	-6.5906	NOT	LAMP2	lysosomal associated membrane protein 2 [Source:HGNC Symbol;Acc:HGNC:6501]
97	ENSG00000005961	0.0516544	6.29769	0.143689	0.886478	0.936923	-6.58673	NOT	ITGA2B	integrin subunit alpha 2b [Source:HGNC Symbol;Acc:HGNC:6138]
98	ENSG00000006007	-0.281863	5.25943	-2.41764	0.0203408	0.103887	-3.83212	NOT	GDE1	glycerophosphodiester phosphodiesterase 1 [Source:HGNC Symbol;Acc:HGNC:29644]
99	ENSG00000006016	-0.0732308	-0.312909	-0.279407	0.781393	0.871758	-5.89692	NOT	CRLF1	cytokine receptor like factor 1 [Source:HGNC Symbol;Acc:HGNC:2364]
100	ENSG00000006025	-0.388115	5.93042	-1.27942	0.208227	0.390769	-5.78285	NOT	OSBPL7	oxysterol binding protein like 7 [Source:HGNC Symbol;Acc:HGNC:16387]
101	ENSG00000006062	0.0688251	5.46389	0.512734	0.610998	0.756112	-6.44786	NOT	MAP3K14	mitogen-activated protein kinase kinase kinase 14 [Source:HGNC Symbol;Acc:HGNC:6853]
102	ENSG00000006071	0.430978	-2.98043	1.15127	0.256556	0.441887	-5.16606	NOT	ABCC8	ATP binding cassette subfamily C member 8 [Source:HGNC Symbol;Acc:HGNC:59]
103	ENSG00000006116	0.556629	-2.37077	1.21552	0.231395	0.41578	-5.12458	NOT	CACNG3	calcium voltage-gated channel auxiliary subunit gamma 3 [Source:HGNC Symbol;Acc:HGNC:1407]
104	ENSG00000006118	0.913066	1.24864	2.30415	0.026567	0.118835	-3.69242	NOT	TMEM132A	transmembrane protein 132A [Source:HGNC Symbol;Acc:HGNC:31092]
105	ENSG00000006125	0.269959	5.75894	1.36576	0.179754	0.357334	-5.67249	NOT	AP2B1	adaptor related protein complex 2 subunit beta 1 [Source:HGNC Symbol;Acc:HGNC:563]
106	ENSG00000006194	-0.116962	5.3553	-1.1855	0.242916	0.42794	-5.88006	NOT	ZNF263	zinc finger protein 263 [Source:HGNC Symbol;Acc:HGNC:13056]
107	ENSG00000006282	-0.259845	5.52346	-1.47065	0.149322	0.319085	-5.52097	NOT	SPATA20	spermatogenesis associated 20 [Source:HGNC Symbol;Acc:HGNC:26125]
108	ENSG00000006283	-0.0265835	-3.05967	-0.0580709	0.953985	0.973433	-5.7634	NOT	CACNA1G	calcium voltage-gated channel subunit alpha1 G [Source:HGNC Symbol;Acc:HGNC:1394]
109	ENSG00000006327	0.506726	2.59917	1.12172	0.268767	0.455121	-5.68215	NOT	TNFRSF12A	TNF receptor superfamily member 12A [Source:HGNC Symbol;Acc:HGNC:18152]
110	ENSG00000006432	0.379714	2.94541	1.78908	0.0812866	0.221081	-4.814	NOT	MAP3K9	mitogen-activated protein kinase kinase kinase 9 [Source:HGNC Symbol;Acc:HGNC:6861]
111	ENSG00000006451	0.3905	5.02717	3.19279	0.0027676	0.0414299	-2.01461	NOT	RALA	RAS like proto-oncogene A [Source:HGNC Symbol;Acc:HGNC:9839]
112	ENSG00000006453	0.783502	0.292234	2.23209	0.03136	0.130832	-3.74904	NOT	BAIAP2L1	BAR/IMD domain containing adaptor protein 2 like 1 [Source:HGNC Symbol;Acc:HGNC:21649]
113	ENSG00000006459	0.24512	7.06795	1.51651	0.137368	0.303118	-5.4733	NOT	KDM7A	lysine demethylase 7A [Source:HGNC Symbol;Acc:HGNC:22224]
114	ENSG00000006468	-0.291197	-2.62719	-0.710426	0.481621	0.656208	-5.55173	NOT	ETV1	ETS variant transcription factor 1 [Source:HGNC Symbol;Acc:HGNC:3490]
115	ENSG00000006530	0.146485	4.15598	0.746215	0.459964	0.637209	-6.2126	NOT	AGK	acylglycerol kinase [Source:HGNC Symbol;Acc:HGNC:21869]
116	ENSG00000006534	-0.315697	4.97804	-1.96357	0.0566601	0.181666	-4.70662	NOT	ALDH3B1	aldehyde dehydrogenase 3 family member B1 [Source:HGNC Symbol;Acc:HGNC:410]
117	ENSG00000006555	-0.458502	3.41444	-2.17558	0.0356421	0.139538	-4.16929	NOT	TTC22	tetratricopeptide repeat domain 22 [Source:HGNC Symbol;Acc:HGNC:26067]
118	ENSG00000006576	-0.114577	5.95892	-0.717513	0.477287	0.652254	-6.33474	NOT	PHTF2	putative homeodomain transcription factor 2 [Source:HGNC Symbol;Acc:HGNC:13411]
119	ENSG00000006606	0.584844	-3.46344	1.53295	0.133273	0.29811	-4.698	NOT	CCL26	C-C motif chemokine ligand 26 [Source:HGNC Symbol;Acc:HGNC:10625]
120	ENSG00000006607	0.0751596	5.11227	0.562109	0.577224	0.730546	-6.40596	NOT	FARP2	FERM, ARH/RhoGEF and pleckstrin domain protein 2 [Source:HGNC Symbol;Acc:HGNC:16460]
121	ENSG00000006625	-0.185724	1.75716	-0.835888	0.408255	0.593091	-5.83517	NOT	GGCT	gamma-glutamylcyclotransferase [Source:HGNC Symbol;Acc:HGNC:21705]
122	ENSG00000006634	0.737815	4.90427	3.22326	0.00254515	0.0397669	-1.93085	NOT	DBF4	DBF4 zinc finger [Source:HGNC Symbol;Acc:HGNC:17364]
123	ENSG00000006638	-0.218529	1.19969	-0.68251	0.498907	0.670653	-5.87645	NOT	TBXA2R	thromboxane A2 receptor [Source:HGNC Symbol;Acc:HGNC:11608]
20628	ENSG00000286021	1.12501	-3.67403	2.12678	0.039749	0.148813	-3.77933	UP	LINC02822	long intergenic non-protein coding RNA 2822 [Source:HGNC Symbol;Acc:HGNC:54353]
125	ENSG00000006695	-0.291573	3.75807	-1.6995	0.0971025	0.245925	-5.04814	NOT	COX10	cytochrome c oxidase assembly factor heme A:farnesyltransferase COX10 [Source:HGNC Symbol;Acc:HGNC:2260]
126	ENSG00000006704	0.396021	-0.165986	1.15676	0.25433	0.439332	-5.32183	NOT	GTF2IRD1	GTF2I repeat domain containing 1 [Source:HGNC Symbol;Acc:HGNC:4661]
127	ENSG00000006712	0.375129	5.72156	1.7952	0.0802892	0.219435	-5.03082	NOT	PAF1	PAF1 homolog, Paf1/RNA polymerase II complex component [Source:HGNC Symbol;Acc:HGNC:25459]
128	ENSG00000006715	0.0523681	5.33321	0.322774	0.748572	0.850849	-6.52222	NOT	VPS41	VPS41 subunit of HOPS complex [Source:HGNC Symbol;Acc:HGNC:12713]
129	ENSG00000006740	-0.233017	-0.0968376	-0.68218	0.499113	0.670685	-5.73299	NOT	ARHGAP44	Rho GTPase activating protein 44 [Source:HGNC Symbol;Acc:HGNC:29096]
130	ENSG00000006744	-0.423981	5.81946	-3.04525	0.00413059	0.0483048	-2.40539	NOT	ELAC2	elaC ribonuclease Z 2 [Source:HGNC Symbol;Acc:HGNC:14198]
131	ENSG00000006747	0.260755	-1.27746	0.678062	0.501693	0.672476	-5.64488	NOT	SCIN	scinderin [Source:HGNC Symbol;Acc:HGNC:21695]
132	ENSG00000006756	-0.641108	3.94407	-2.76659	0.00857978	0.0683699	-2.96374	NOT	ARSD	arylsulfatase D [Source:HGNC Symbol;Acc:HGNC:717]
133	ENSG00000006757	-0.459366	1.75637	-2.43361	0.0195795	0.10236	-3.47223	NOT	PNPLA4	patatin like phospholipase domain containing 4 [Source:HGNC Symbol;Acc:HGNC:24887]
134	ENSG00000006831	0.194375	5.97892	1.4487	0.155329	0.327074	-5.56495	NOT	ADIPOR2	adiponectin receptor 2 [Source:HGNC Symbol;Acc:HGNC:24041]
135	ENSG00000007001	0.228417	0.533324	0.606838	0.547437	0.707828	-5.8489	NOT	UPP2	uridine phosphorylase 2 [Source:HGNC Symbol;Acc:HGNC:23061]
136	ENSG00000007038	-0.443423	2.22788	-1.24862	0.219167	0.402444	-5.4806	NOT	PRSS21	serine protease 21 [Source:HGNC Symbol;Acc:HGNC:9485]
137	ENSG00000007047	0.0866135	6.00144	0.648584	0.520367	0.687616	-6.38305	NOT	MARK4	microtubule affinity regulating kinase 4 [Source:HGNC Symbol;Acc:HGNC:13538]
138	ENSG00000007062	0.534888	-1.33816	1.5444	0.130481	0.294727	-4.76814	NOT	PROM1	prominin 1 [Source:HGNC Symbol;Acc:HGNC:9454]
139	ENSG00000007080	-0.287255	5.23943	-1.34741	0.185542	0.363437	-5.67547	NOT	CCDC124	coiled-coil domain containing 124 [Source:HGNC Symbol;Acc:HGNC:25171]
140	ENSG00000007129	-0.0434713	5.46003	-0.278064	0.782416	0.872465	-6.53993	NOT	CEACAM21	CEA cell adhesion molecule 21 [Source:HGNC Symbol;Acc:HGNC:28834]
141	ENSG00000007168	0.293387	7.23923	2.66933	0.0109802	0.0764559	-3.30532	NOT	PAFAH1B1	platelet activating factor acetylhydrolase 1b regulatory subunit 1 [Source:HGNC Symbol;Acc:HGNC:8574]
142	ENSG00000007171	0.331377	-1.87483	0.910338	0.368176	0.555144	-5.44182	NOT	NOS2	nitric oxide synthase 2 [Source:HGNC Symbol;Acc:HGNC:7873]
143	ENSG00000007174	0.272662	-0.323993	0.70459	0.485207	0.658963	-5.69942	NOT	DNAH9	dynein axonemal heavy chain 9 [Source:HGNC Symbol;Acc:HGNC:2953]
144	ENSG00000007202	-0.381551	6.29121	-2.20496	0.0333553	0.135323	-4.29056	NOT	KIAA0100	KIAA0100 [Source:HGNC Symbol;Acc:HGNC:28960]
145	ENSG00000007237	-0.288021	7.71403	-1.89526	0.0654063	0.196329	-4.864	NOT	GAS7	growth arrest specific 7 [Source:HGNC Symbol;Acc:HGNC:4169]
146	ENSG00000007264	-0.447532	6.24112	-1.53401	0.133012	0.297704	-5.44479	NOT	MATK	megakaryocyte-associated tyrosine kinase [Source:HGNC Symbol;Acc:HGNC:6906]
147	ENSG00000007312	-0.00538016	-2.09276	-0.0181413	0.985618	0.992418	-5.81299	NOT	CD79B	CD79b molecule [Source:HGNC Symbol;Acc:HGNC:1699]
148	ENSG00000007314	-0.090003	-0.709122	-0.243684	0.808739	0.889522	-5.87091	NOT	SCN4A	sodium voltage-gated channel alpha subunit 4 [Source:HGNC Symbol;Acc:HGNC:10591]
149	ENSG00000007341	0.238188	3.98574	1.4999	0.141606	0.308684	-5.37745	NOT	ST7L	suppression of tumorigenicity 7 like [Source:HGNC Symbol;Acc:HGNC:18441]
20626	ENSG00000286016	1.02588	-2.45688	2.40906	0.0207606	0.104808	-3.28846	UP	AC079949.3	novel transcript
151	ENSG00000007372	0.0132839	-2.94356	0.0559175	0.95569	0.974597	-5.76892	NOT	PAX6	paired box 6 [Source:HGNC Symbol;Acc:HGNC:8620]
152	ENSG00000007376	-0.683636	4.47062	-2.84719	0.00696959	0.0611965	-2.81821	NOT	RPUSD1	RNA pseudouridine synthase domain containing 1 [Source:HGNC Symbol;Acc:HGNC:14173]
153	ENSG00000007384	0.371353	-1.00641	1.23219	0.225177	0.408378	-5.17466	NOT	RHBDF1	rhomboid 5 homolog 1 [Source:HGNC Symbol;Acc:HGNC:20561]
154	ENSG00000007392	-0.066609	7.055	-0.570259	0.571738	0.725887	-6.43469	NOT	LUC7L	LUC7 like [Source:HGNC Symbol;Acc:HGNC:6723]
155	ENSG00000007402	0.0808314	3.19256	0.282346	0.779155	0.870386	-6.33303	NOT	CACNA2D2	calcium voltage-gated channel auxiliary subunit alpha2delta 2 [Source:HGNC Symbol;Acc:HGNC:1400]
156	ENSG00000007516	-0.292519	4.8389	-0.798874	0.42915	0.610772	-6.22653	NOT	BAIAP3	BAI1 associated protein 3 [Source:HGNC Symbol;Acc:HGNC:948]
157	ENSG00000007520	-0.606097	4.81715	-2.59847	0.0131043	0.0838309	-3.41302	NOT	TSR3	TSR3 ribosome maturation factor [Source:HGNC Symbol;Acc:HGNC:14175]
158	ENSG00000007541	-0.296018	4.82799	-1.52867	0.134331	0.299281	-5.40361	NOT	PIGQ	phosphatidylinositol glycan anchor biosynthesis class Q [Source:HGNC Symbol;Acc:HGNC:14135]
159	ENSG00000007545	0.640447	2.37663	2.10833	0.0414073	0.152184	-4.18703	NOT	CRAMP1	cramped chromatin regulator homolog 1 [Source:HGNC Symbol;Acc:HGNC:14122]
160	ENSG00000007866	-0.189604	-2.18659	-0.576987	0.567228	0.722707	-5.65285	NOT	TEAD3	TEA domain transcription factor 3 [Source:HGNC Symbol;Acc:HGNC:11716]
161	ENSG00000007923	-0.354335	4.77225	-2.51032	0.0162712	0.0931413	-3.60724	NOT	DNAJC11	DnaJ heat shock protein family (Hsp40) member C11 [Source:HGNC Symbol;Acc:HGNC:25570]
162	ENSG00000007944	0.377065	7.02423	1.4781	0.147326	0.316689	-5.52823	NOT	MYLIP	myosin regulatory light chain interacting protein [Source:HGNC Symbol;Acc:HGNC:21155]
163	ENSG00000007952	-0.238528	-2.33784	-0.759882	0.451845	0.630472	-5.5324	NOT	NOX1	NADPH oxidase 1 [Source:HGNC Symbol;Acc:HGNC:7889]
164	ENSG00000007968	0.0162441	3.90585	0.0709992	0.943757	0.968241	-6.45871	NOT	E2F2	E2F transcription factor 2 [Source:HGNC Symbol;Acc:HGNC:3114]
165	ENSG00000008018	-0.209308	6.84265	-1.80952	0.0779979	0.215561	-5.01606	NOT	PSMB1	proteasome 20S subunit beta 1 [Source:HGNC Symbol;Acc:HGNC:9537]
20612	ENSG00000285966	1.6753	-0.657449	2.67188	0.0109101	0.0761418	-2.81154	UP	AC007686.4	novel transcript
20604	ENSG00000285943	-1.14358	-1.98446	-2.46406	0.0181994	0.0989317	-3.18964	DOWN	AC112128.1	novel protein
168	ENSG00000008086	0.371846	3.38337	1.75051	0.087808	0.231555	-4.9299	NOT	CDKL5	cyclin dependent kinase like 5 [Source:HGNC Symbol;Acc:HGNC:11411]
20592	ENSG00000285889	-1.08393	-2.06769	-3.11074	0.00346168	0.0451718	-1.80585	DOWN	AL355312.5	novel transcript
170	ENSG00000008128	-0.395228	1.43673	-1.22612	0.227425	0.410836	-5.40973	NOT	CDK11A	cyclin dependent kinase 11A [Source:HGNC Symbol;Acc:HGNC:1730]
171	ENSG00000008130	-0.0741088	8.02974	-0.420639	0.676302	0.801323	-6.50031	NOT	NADK	NAD kinase [Source:HGNC Symbol;Acc:HGNC:29831]
172	ENSG00000008226	0.310651	2.18343	1.31572	0.195866	0.375879	-5.40247	NOT	DLEC1	DLEC1 cilia and flagella associated protein [Source:HGNC Symbol;Acc:HGNC:2899]
173	ENSG00000008256	0.162183	4.71028	1.11667	0.270896	0.457651	-5.92282	NOT	CYTH3	cytohesin 3 [Source:HGNC Symbol;Acc:HGNC:9504]
174	ENSG00000008277	0.24544	2.25511	1.29623	0.202433	0.383439	-5.43508	NOT	ADAM22	ADAM metallopeptidase domain 22 [Source:HGNC Symbol;Acc:HGNC:201]
175	ENSG00000008282	0.162838	4.89015	1.31409	0.196411	0.376505	-5.70283	NOT	SYPL1	synaptophysin like 1 [Source:HGNC Symbol;Acc:HGNC:11507]
176	ENSG00000008283	-0.494001	4.63071	-3.05211	0.00405523	0.0480735	-2.33812	NOT	CYB561	cytochrome b561 [Source:HGNC Symbol;Acc:HGNC:2571]
20585	ENSG00000285872	1.77164	-1.39733	3.47725	0.0012491	0.0305405	-0.941252	UP	AC007240.3	novel transcript
178	ENSG00000008300	-0.0488789	2.90589	-0.236054	0.814613	0.892812	-6.30508	NOT	CELSR3	cadherin EGF LAG seven-pass G-type receptor 3 [Source:HGNC Symbol;Acc:HGNC:3230]
179	ENSG00000008311	-0.249539	1.98483	-1.11399	0.27203	0.458928	-5.60343	NOT	AASS	aminoadipate-semialdehyde synthase [Source:HGNC Symbol;Acc:HGNC:17366]
180	ENSG00000008323	0.545938	2.51722	1.67266	0.102313	0.253786	-4.94759	NOT	PLEKHG6	pleckstrin homology and RhoGEF domain containing G6 [Source:HGNC Symbol;Acc:HGNC:25562]
181	ENSG00000008382	-0.427072	3.2488	-2.36635	0.0229698	0.110155	-3.77114	NOT	MPND	MPN domain containing [Source:HGNC Symbol;Acc:HGNC:25934]
182	ENSG00000008394	-0.0658901	3.21526	-0.28511	0.777053	0.869068	-6.33397	NOT	MGST1	microsomal glutathione S-transferase 1 [Source:HGNC Symbol;Acc:HGNC:7061]
20574	ENSG00000285817	1.1563	-3.57719	2.61051	0.0127188	0.0823878	-2.86991	UP	AC105213.1	Novel transcript
184	ENSG00000008438	0.993809	2.09716	1.13716	0.262334	0.448511	-5.601	NOT	PGLYRP1	peptidoglycan recognition protein 1 [Source:HGNC Symbol;Acc:HGNC:8904]
185	ENSG00000008441	-0.187021	3.73668	-0.808785	0.423493	0.606215	-6.11444	NOT	NFIX	nuclear factor I X [Source:HGNC Symbol;Acc:HGNC:7788]
186	ENSG00000008513	-0.0680725	7.4089	-0.558405	0.579725	0.732111	-6.43911	NOT	ST3GAL1	ST3 beta-galactoside alpha-2,3-sialyltransferase 1 [Source:HGNC Symbol;Acc:HGNC:10862]
187	ENSG00000008516	1.31953	5.27968	1.64356	0.108219	0.262497	-5.25654	NOT	MMP25	matrix metallopeptidase 25 [Source:HGNC Symbol;Acc:HGNC:14246]
188	ENSG00000008517	-0.816699	7.16708	-2.55375	0.0146326	0.0883982	-3.56262	NOT	IL32	interleukin 32 [Source:HGNC Symbol;Acc:HGNC:16830]
189	ENSG00000008710	-0.583887	6.03922	-3.13196	0.00326793	0.0442312	-2.19222	NOT	PKD1	polycystin 1, transient receptor potential channel interacting [Source:HGNC Symbol;Acc:HGNC:9008]
190	ENSG00000008735	-0.830902	-0.495808	-2.30241	0.0266744	0.119112	-3.55863	NOT	MAPK8IP2	mitogen-activated protein kinase 8 interacting protein 2 [Source:HGNC Symbol;Acc:HGNC:6883]
191	ENSG00000008838	-0.445656	5.9698	-3.04255	0.0041607	0.0484019	-2.41473	NOT	MED24	mediator complex subunit 24 [Source:HGNC Symbol;Acc:HGNC:22963]
192	ENSG00000008853	-0.495595	1.36614	-1.81212	0.0775891	0.214832	-4.58308	NOT	RHOBTB2	Rho related BTB domain containing 2 [Source:HGNC Symbol;Acc:HGNC:18756]
193	ENSG00000008869	-0.438097	6.10184	-2.54249	0.0150422	0.0895417	-3.58471	NOT	HEATR5B	HEAT repeat containing 5B [Source:HGNC Symbol;Acc:HGNC:29273]
194	ENSG00000008952	0.402012	6.35075	3.17582	0.00289937	0.0420733	-2.08764	NOT	SEC62	SEC62 homolog, preprotein translocation factor [Source:HGNC Symbol;Acc:HGNC:11846]
195	ENSG00000008988	-0.236371	9.62486	-1.19908	0.237653	0.422536	-5.85401	NOT	RPS20	ribosomal protein S20 [Source:HGNC Symbol;Acc:HGNC:10405]
196	ENSG00000009307	-0.0440407	8.88301	-0.343209	0.733265	0.840601	-6.5178	NOT	CSDE1	cold shock domain containing E1 [Source:HGNC Symbol;Acc:HGNC:29905]
197	ENSG00000009335	-0.435405	6.39719	-3.17506	0.00290538	0.0421016	-2.0881	NOT	UBE3C	ubiquitin protein ligase E3C [Source:HGNC Symbol;Acc:HGNC:16803]
198	ENSG00000009413	0.13502	5.65512	0.831327	0.410795	0.595155	-6.24146	NOT	REV3L	REV3 like, DNA directed polymerase zeta catalytic subunit [Source:HGNC Symbol;Acc:HGNC:9968]
199	ENSG00000009694	-0.0258449	2.18771	-0.101952	0.919311	0.955892	-6.23014	NOT	TENM1	teneurin transmembrane protein 1 [Source:HGNC Symbol;Acc:HGNC:8117]
200	ENSG00000009724	0.537331	-1.51797	1.29308	0.203508	0.384807	-5.0775	NOT	MASP2	mannan binding lectin serine peptidase 2 [Source:HGNC Symbol;Acc:HGNC:6902]
201	ENSG00000009780	0.189481	4.14557	1.96864	0.0560526	0.180501	-4.63856	NOT	FAM76A	family with sequence similarity 76 member A [Source:HGNC Symbol;Acc:HGNC:28530]
202	ENSG00000009790	-0.328419	7.71191	-1.61182	0.114979	0.272475	-5.3272	NOT	TRAF3IP3	TRAF3 interacting protein 3 [Source:HGNC Symbol;Acc:HGNC:30766]
203	ENSG00000009830	-0.178116	3.28836	-1.53212	0.133478	0.29818	-5.24735	NOT	POMT2	protein O-mannosyltransferase 2 [Source:HGNC Symbol;Acc:HGNC:19743]
204	ENSG00000009844	0.137185	4.85446	1.2942	0.203126	0.38433	-5.72544	NOT	VTA1	vesicle trafficking 1 [Source:HGNC Symbol;Acc:HGNC:20954]
20556	ENSG00000285747	1.07565	-2.33012	2.72932	0.00943553	0.0713848	-2.64336	UP	AL133485.3	novel transcript
206	ENSG00000009954	-0.0533288	6.14648	-0.559791	0.578789	0.731682	-6.43818	NOT	BAZ1B	bromodomain adjacent to zinc finger domain 1B [Source:HGNC Symbol;Acc:HGNC:961]
207	ENSG00000010017	0.571324	5.23246	2.45406	0.0186426	0.100076	-3.75707	NOT	RANBP9	RAN binding protein 9 [Source:HGNC Symbol;Acc:HGNC:13727]
208	ENSG00000010030	0.398158	2.21168	1.04267	0.303452	0.491889	-5.71304	NOT	ETV7	ETS variant transcription factor 7 [Source:HGNC Symbol;Acc:HGNC:18160]
209	ENSG00000010072	0.418458	3.35562	1.91539	0.0627159	0.191371	-4.6496	NOT	SPRTN	SprT-like N-terminal domain [Source:HGNC Symbol;Acc:HGNC:25356]
210	ENSG00000010165	-0.522234	3.14623	-1.95451	0.057758	0.183427	-4.54643	NOT	EEF1AKNMT	eEF1A lysine and N-terminal methyltransferase [Source:HGNC Symbol;Acc:HGNC:24248]
211	ENSG00000010219	-0.458942	-0.130832	-1.59911	0.11778	0.276685	-4.76675	NOT	DYRK4	dual specificity tyrosine phosphorylation regulated kinase 4 [Source:HGNC Symbol;Acc:HGNC:3095]
212	ENSG00000010244	-0.140549	7.77096	-1.25694	0.216171	0.398904	-5.81279	NOT	ZNF207	zinc finger protein 207 [Source:HGNC Symbol;Acc:HGNC:12998]
213	ENSG00000010256	-0.49792	6.46022	-2.74799	0.00899735	0.0700858	-3.12473	NOT	UQCRC1	ubiquinol-cytochrome c reductase core protein 1 [Source:HGNC Symbol;Acc:HGNC:12585]
214	ENSG00000010270	0.232408	4.95528	1.76984	0.0844866	0.226439	-5.04258	NOT	STARD3NL	STARD3 N-terminal like [Source:HGNC Symbol;Acc:HGNC:19169]
215	ENSG00000010278	0.0735356	4.82224	0.35553	0.724088	0.83419	-6.48307	NOT	CD9	CD9 molecule [Source:HGNC Symbol;Acc:HGNC:1709]
216	ENSG00000010292	-0.553391	5.35462	-2.91502	0.00583764	0.0562658	-2.70834	NOT	NCAPD2	non-SMC condensin I complex subunit D2 [Source:HGNC Symbol;Acc:HGNC:24305]
217	ENSG00000010295	-0.710494	6.47092	-3.29047	0.00211306	0.0367536	-1.79184	NOT	IFFO1	intermediate filament family orphan 1 [Source:HGNC Symbol;Acc:HGNC:24970]
218	ENSG00000010310	-0.338192	3.59268	-0.885554	0.381227	0.567717	-6.02889	NOT	GIPR	gastric inhibitory polypeptide receptor [Source:HGNC Symbol;Acc:HGNC:4271]
219	ENSG00000010318	-0.418593	3.99755	-3.36506	0.00171547	0.0342473	-1.49918	NOT	PHF7	PHD finger protein 7 [Source:HGNC Symbol;Acc:HGNC:18458]
20529	ENSG00000285646	2.11546	-0.386772	3.10019	0.00356208	0.0455798	-1.864	UP	AL021155.4	novel transcript
221	ENSG00000010322	-0.464983	7.59215	-3.04493	0.00413418	0.0483048	-2.41164	NOT	NISCH	nischarin [Source:HGNC Symbol;Acc:HGNC:18006]
222	ENSG00000010327	-0.701774	7.726	-3.24054	0.0024267	0.038861	-1.91798	NOT	STAB1	stabilin 1 [Source:HGNC Symbol;Acc:HGNC:18628]
223	ENSG00000010361	0.0153832	3.82118	0.0770806	0.938949	0.965364	-6.44844	NOT	FUZ	fuzzy planar cell polarity protein [Source:HGNC Symbol;Acc:HGNC:26219]
224	ENSG00000010379	-0.461072	-0.835625	-1.63386	0.11025	0.265622	-4.66715	NOT	SLC6A13	solute carrier family 6 member 13 [Source:HGNC Symbol;Acc:HGNC:11046]
225	ENSG00000010438	0.374892	-1.1426	1.19392	0.239644	0.424618	-5.20875	NOT	PRSS3	serine protease 3 [Source:HGNC Symbol;Acc:HGNC:9486]
226	ENSG00000010539	0.0915604	1.52825	0.336135	0.738551	0.843607	-6.09253	NOT	ZNF200	zinc finger protein 200 [Source:HGNC Symbol;Acc:HGNC:12993]
20527	ENSG00000285639	6.41914	1.23678	7.10003	1.47237e-08	5.72823e-05	9.27691	UP	AL133259.1	novel transcript
228	ENSG00000010626	0.126652	3.32665	1.13867	0.261711	0.44792	-5.75518	NOT	LRRC23	leucine rich repeat containing 23 [Source:HGNC Symbol;Acc:HGNC:19138]
229	ENSG00000010671	-0.536045	6.20063	-2.79388	0.0079994	0.0659624	-3.01554	NOT	BTK	Bruton tyrosine kinase [Source:HGNC Symbol;Acc:HGNC:1133]
230	ENSG00000010704	-0.858402	2.43866	-3.65786	0.000742911	0.0246314	-0.596482	NOT	HFE	homeostatic iron regulator [Source:HGNC Symbol;Acc:HGNC:4886]
231	ENSG00000010803	0.433503	3.87523	1.94528	0.0588965	0.185226	-4.65444	NOT	SCMH1	Scm polycomb group protein homolog 1 [Source:HGNC Symbol;Acc:HGNC:19003]
232	ENSG00000010810	-0.00377622	8.62247	-0.0151032	0.988026	0.993974	-6.58092	NOT	FYN	FYN proto-oncogene, Src family tyrosine kinase [Source:HGNC Symbol;Acc:HGNC:4037]
233	ENSG00000010818	0.82128	5.84445	2.70793	0.00996163	0.0732263	-3.21206	NOT	HIVEP2	HIVEP zinc finger 2 [Source:HGNC Symbol;Acc:HGNC:4921]
234	ENSG00000010932	-0.0582851	-3.01178	-0.217789	0.828716	0.902324	-5.74516	NOT	FMO1	flavin containing dimethylaniline monoxygenase 1 [Source:HGNC Symbol;Acc:HGNC:3769]
235	ENSG00000011007	-0.164333	4.90403	-1.6018	0.117182	0.275865	-5.3018	NOT	ELOA	elongin A [Source:HGNC Symbol;Acc:HGNC:11620]
236	ENSG00000011009	-0.262546	5.85472	-1.41866	0.163854	0.337802	-5.60184	NOT	LYPLA2	lysophospholipase 2 [Source:HGNC Symbol;Acc:HGNC:6738]
237	ENSG00000011021	-0.0252724	5.86984	-0.191264	0.8493	0.914624	-6.57235	NOT	CLCN6	chloride voltage-gated channel 6 [Source:HGNC Symbol;Acc:HGNC:2024]
238	ENSG00000011028	-0.100393	2.26435	-0.410461	0.68369	0.806352	-6.16116	NOT	MRC2	mannose receptor C type 2 [Source:HGNC Symbol;Acc:HGNC:16875]
239	ENSG00000011052	-0.439495	-1.80576	-1.28117	0.207619	0.390089	-5.07445	NOT	NME1-NME2	NME1-NME2 readthrough [Source:HGNC Symbol;Acc:HGNC:33531]
240	ENSG00000011083	0.106005	-2.9286	0.255175	0.799914	0.883714	-5.74113	NOT	SLC6A7	solute carrier family 6 member 7 [Source:HGNC Symbol;Acc:HGNC:11054]
241	ENSG00000011105	0.0753825	2.27047	0.247944	0.805465	0.887575	-6.21701	NOT	TSPAN9	tetraspanin 9 [Source:HGNC Symbol;Acc:HGNC:21640]
242	ENSG00000011114	0.159051	5.37157	1.55011	0.129105	0.292767	-5.40416	NOT	BTBD7	BTB domain containing 7 [Source:HGNC Symbol;Acc:HGNC:18269]
243	ENSG00000011132	0.048306	5.31343	0.274992	0.784758	0.874006	-6.53564	NOT	APBA3	amyloid beta precursor protein binding family A member 3 [Source:HGNC Symbol;Acc:HGNC:580]
244	ENSG00000011143	-0.576563	2.1078	-2.29065	0.0274112	0.121164	-3.79564	NOT	MKS1	MKS transition zone complex subunit 1 [Source:HGNC Symbol;Acc:HGNC:7121]
245	ENSG00000011198	0.442117	6.04801	1.93105	0.0606888	0.188122	-4.80312	NOT	ABHD5	abhydrolase domain containing 5 [Source:HGNC Symbol;Acc:HGNC:21396]
246	ENSG00000011201	0.239941	-1.85181	0.700175	0.487929	0.661283	-5.59864	NOT	ANOS1	anosmin 1 [Source:HGNC Symbol;Acc:HGNC:6211]
247	ENSG00000011243	-0.308226	6.47365	-2.41679	0.0203816	0.103975	-3.8593	NOT	AKAP8L	A-kinase anchoring protein 8 like [Source:HGNC Symbol;Acc:HGNC:29857]
248	ENSG00000011258	-0.0165003	5.41848	-0.136793	0.891891	0.939744	-6.56809	NOT	MBTD1	mbt domain containing 1 [Source:HGNC Symbol;Acc:HGNC:19866]
249	ENSG00000011260	0.0464327	5.61811	0.565283	0.575084	0.728817	-6.42457	NOT	UTP18	UTP18 small subunit processome component [Source:HGNC Symbol;Acc:HGNC:24274]
250	ENSG00000011275	-0.0720108	7.18415	-0.604248	0.54914	0.708945	-6.41408	NOT	RNF216	ring finger protein 216 [Source:HGNC Symbol;Acc:HGNC:21698]
251	ENSG00000011295	0.176432	5.73937	1.75299	0.0873775	0.231269	-5.10062	NOT	TTC19	tetratricopeptide repeat domain 19 [Source:HGNC Symbol;Acc:HGNC:26006]
252	ENSG00000011304	-0.52768	7.89722	-3.04504	0.00413293	0.0483048	-2.40884	NOT	PTBP1	polypyrimidine tract binding protein 1 [Source:HGNC Symbol;Acc:HGNC:9583]
253	ENSG00000011332	0.129862	-0.822938	0.444838	0.658869	0.790229	-5.7973	NOT	DPF1	double PHD fingers 1 [Source:HGNC Symbol;Acc:HGNC:20225]
254	ENSG00000011376	0.269491	3.94375	1.70808	0.0954855	0.243847	-5.06	NOT	LARS2	leucyl-tRNA synthetase 2, mitochondrial [Source:HGNC Symbol;Acc:HGNC:17095]
255	ENSG00000011405	0.570479	5.6334	2.64004	0.0118167	0.0790651	-3.36218	NOT	PIK3C2A	phosphatidylinositol-4-phosphate 3-kinase catalytic subunit type 2 alpha [Source:HGNC Symbol;Acc:HGNC:8971]
20514	ENSG00000285565	2.30807	-2.35306	5.02618	1.12496e-05	0.00358637	3.08561	UP	AL671762.1	novel transcript
20506	ENSG00000285534	1.31288	2.04533	2.42211	0.0201251	0.103518	-3.53327	UP	AL163541.1	novel transcript
258	ENSG00000011451	-0.437079	5.47786	-3.22226	0.00255219	0.0397669	-1.95199	NOT	WIZ	WIZ zinc finger [Source:HGNC Symbol;Acc:HGNC:30917]
259	ENSG00000011454	0.100603	5.5725	0.791642	0.433307	0.613528	-6.27079	NOT	RABGAP1	RAB GTPase activating protein 1 [Source:HGNC Symbol;Acc:HGNC:17155]
260	ENSG00000011465	0.728198	-2.24475	1.50389	0.140578	0.307379	-4.78228	NOT	DCN	decorin [Source:HGNC Symbol;Acc:HGNC:2705]
261	ENSG00000011478	0.0955714	3.55018	0.542102	0.590799	0.7406	-6.27339	NOT	QPCTL	glutaminyl-peptide cyclotransferase like [Source:HGNC Symbol;Acc:HGNC:25952]
262	ENSG00000011485	-0.589235	5.20193	-3.49637	0.00118284	0.0298758	-1.22488	NOT	PPP5C	protein phosphatase 5 catalytic subunit [Source:HGNC Symbol;Acc:HGNC:9322]
263	ENSG00000011523	0.513328	3.29252	2.418	0.020323	0.103873	-3.6767	NOT	CEP68	centrosomal protein 68 [Source:HGNC Symbol;Acc:HGNC:29076]
264	ENSG00000011566	0.343938	4.4233	1.37209	0.177793	0.355208	-5.59426	NOT	MAP4K3	mitogen-activated protein kinase kinase kinase kinase 3 [Source:HGNC Symbol;Acc:HGNC:6865]
265	ENSG00000011590	-0.0909956	1.90482	-0.384998	0.702308	0.818701	-6.12325	NOT	ZBTB32	zinc finger and BTB domain containing 32 [Source:HGNC Symbol;Acc:HGNC:16763]
266	ENSG00000011600	-0.390175	8.70554	-1.81122	0.0777299	0.215021	-4.99603	NOT	TYROBP	transmembrane immune signaling adaptor TYROBP [Source:HGNC Symbol;Acc:HGNC:12449]
267	ENSG00000011638	-0.0556457	3.04793	-0.410051	0.683988	0.806509	-6.26859	NOT	TMEM159	transmembrane protein 159 [Source:HGNC Symbol;Acc:HGNC:30136]
268	ENSG00000011677	0.500889	-3.14859	0.971219	0.33736	0.524911	-5.33092	NOT	GABRA3	gamma-aminobutyric acid type A receptor subunit alpha3 [Source:HGNC Symbol;Acc:HGNC:4077]
269	ENSG00000012048	-0.276457	2.14859	-1.2088	0.233939	0.418707	-5.52019	NOT	BRCA1	BRCA1 DNA repair associated [Source:HGNC Symbol;Acc:HGNC:1100]
270	ENSG00000012061	0.155789	5.37771	1.07647	0.288258	0.475845	-6.00259	NOT	ERCC1	ERCC excision repair 1, endonuclease non-catalytic subunit [Source:HGNC Symbol;Acc:HGNC:3433]
271	ENSG00000012124	-0.282104	5.72879	-0.857051	0.396596	0.582525	-6.21961	NOT	CD22	CD22 molecule [Source:HGNC Symbol;Acc:HGNC:1643]
20502	ENSG00000285509	-1.1007	-1.91088	-2.94935	0.00533268	0.0543316	-2.17138	DOWN	AP000646.1	novel protein
273	ENSG00000012174	-0.204983	2.64593	-0.974831	0.335587	0.523214	-5.83049	NOT	MBTPS2	membrane bound transcription factor peptidase, site 2 [Source:HGNC Symbol;Acc:HGNC:15455]
274	ENSG00000012211	-0.0938109	2.99468	-0.573958	0.569256	0.724355	-6.18184	NOT	PRICKLE3	prickle planar cell polarity protein 3 [Source:HGNC Symbol;Acc:HGNC:6645]
275	ENSG00000012223	1.69833	5.59223	1.12935	0.265576	0.451761	-5.94711	NOT	LTF	lactotransferrin [Source:HGNC Symbol;Acc:HGNC:6720]
276	ENSG00000012232	-0.409822	5.49357	-2.49375	0.0169394	0.0951009	-3.67713	NOT	EXTL3	exostosin like glycosyltransferase 3 [Source:HGNC Symbol;Acc:HGNC:3518]
277	ENSG00000012504	0.612387	-3.61449	1.40452	0.167995	0.343667	-4.85738	NOT	NR1H4	nuclear receptor subfamily 1 group H member 4 [Source:HGNC Symbol;Acc:HGNC:7967]
278	ENSG00000012660	0.638144	7.59619	3.62504	0.000817105	0.025811	-0.902385	NOT	ELOVL5	ELOVL fatty acid elongase 5 [Source:HGNC Symbol;Acc:HGNC:21308]
279	ENSG00000012779	-0.439321	8.1854	-2.33489	0.0247304	0.114286	-4.02121	NOT	ALOX5	arachidonate 5-lipoxygenase [Source:HGNC Symbol;Acc:HGNC:435]
280	ENSG00000012817	0.48981	5.44396	0.653491	0.517233	0.684994	-6.36629	NOT	KDM5D	lysine demethylase 5D [Source:HGNC Symbol;Acc:HGNC:11115]
281	ENSG00000012822	-0.447304	7.04502	-2.97149	0.00502914	0.0527606	-2.59468	NOT	CALCOCO1	calcium binding and coiled-coil domain 1 [Source:HGNC Symbol;Acc:HGNC:29306]
282	ENSG00000012963	-0.380764	3.83019	-2.40112	0.0211559	0.105637	-3.76067	NOT	UBR7	ubiquitin protein ligase E3 component n-recognin 7 [Source:HGNC Symbol;Acc:HGNC:20344]
283	ENSG00000012983	0.276722	5.47229	1.94781	0.0585822	0.184827	-4.76022	NOT	MAP4K5	mitogen-activated protein kinase kinase kinase kinase 5 [Source:HGNC Symbol;Acc:HGNC:6867]
284	ENSG00000013016	-0.393819	3.40061	-1.84972	0.0718598	0.205659	-4.75941	NOT	EHD3	EH domain containing 3 [Source:HGNC Symbol;Acc:HGNC:3244]
285	ENSG00000013275	0.279393	5.92333	1.66698	0.103444	0.255222	-5.24217	NOT	PSMC4	proteasome 26S subunit, ATPase 4 [Source:HGNC Symbol;Acc:HGNC:9551]
286	ENSG00000013288	-0.506382	6.37986	-3.60879	0.000856438	0.0262531	-0.94812	NOT	MAN2B2	mannosidase alpha class 2B member 2 [Source:HGNC Symbol;Acc:HGNC:29623]
287	ENSG00000013306	-0.192898	7.47937	-0.375519	0.709287	0.824111	-6.52393	NOT	SLC25A39	solute carrier family 25 member 39 [Source:HGNC Symbol;Acc:HGNC:24279]
288	ENSG00000013364	-0.766669	8.08688	-3.41256	0.00150064	0.0326094	-1.46755	NOT	MVP	major vault protein [Source:HGNC Symbol;Acc:HGNC:7531]
289	ENSG00000013374	0.194283	6.47047	1.94729	0.0586472	0.184947	-4.77761	NOT	NUB1	negative regulator of ubiquitin like proteins 1 [Source:HGNC Symbol;Acc:HGNC:17623]
290	ENSG00000013375	-0.00127394	2.7299	-0.00520577	0.995873	0.997943	-6.30922	NOT	PGM3	phosphoglucomutase 3 [Source:HGNC Symbol;Acc:HGNC:8907]
291	ENSG00000013392	-0.752922	1.5297	-3.0455	0.00412787	0.0483048	-2.08321	NOT	RWDD2A	RWD domain containing 2A [Source:HGNC Symbol;Acc:HGNC:21385]
292	ENSG00000013441	0.397379	8.77346	2.32138	0.0255229	0.115933	-4.04108	NOT	CLK1	CDC like kinase 1 [Source:HGNC Symbol;Acc:HGNC:2068]
293	ENSG00000013503	-0.0798812	2.20185	-0.353773	0.725393	0.835414	-6.17525	NOT	POLR3B	RNA polymerase III subunit B [Source:HGNC Symbol;Acc:HGNC:30348]
294	ENSG00000013523	-0.457761	4.17583	-2.91395	0.00585412	0.0562658	-2.64061	NOT	ANGEL1	angel homolog 1 [Source:HGNC Symbol;Acc:HGNC:19961]
295	ENSG00000013561	-0.28082	2.73149	-1.62896	0.111286	0.266968	-5.03383	NOT	RNF14	ring finger protein 14 [Source:HGNC Symbol;Acc:HGNC:10058]
296	ENSG00000013563	-0.236103	2.22655	-1.26026	0.214984	0.397792	-5.47011	NOT	DNASE1L1	deoxyribonuclease 1 like 1 [Source:HGNC Symbol;Acc:HGNC:2957]
297	ENSG00000013573	0.122476	3.63519	0.46485	0.644596	0.780198	-6.32208	NOT	DDX11	DEAD/H-box helicase 11 [Source:HGNC Symbol;Acc:HGNC:2736]
298	ENSG00000013583	-0.0791406	3.34353	-0.543647	0.589746	0.739842	-6.24444	NOT	HEBP1	heme binding protein 1 [Source:HGNC Symbol;Acc:HGNC:17176]
20493	ENSG00000285448	1.09899	-2.39804	2.76434	0.00862928	0.0685601	-2.56816	UP	AL136961.1	novel transcript
300	ENSG00000013619	0.146912	1.2908	0.520012	0.605963	0.751992	-5.98677	NOT	MAMLD1	mastermind like domain containing 1 [Source:HGNC Symbol;Acc:HGNC:2568]
301	ENSG00000013725	-0.192816	8.19532	-0.852042	0.399337	0.584743	-6.2252	NOT	CD6	CD6 molecule [Source:HGNC Symbol;Acc:HGNC:1691]
302	ENSG00000013810	-0.390037	6.99857	-2.26729	0.02893	0.125102	-4.1681	NOT	TACC3	transforming acidic coiled-coil containing protein 3 [Source:HGNC Symbol;Acc:HGNC:11524]
303	ENSG00000014123	0.0712086	5.11709	0.370345	0.713108	0.827205	-6.49545	NOT	UFL1	UFM1 specific ligase 1 [Source:HGNC Symbol;Acc:HGNC:23039]
304	ENSG00000014164	0.0560797	6.40035	0.482135	0.632376	0.771672	-6.48122	NOT	ZC3H3	zinc finger CCCH-type containing 3 [Source:HGNC Symbol;Acc:HGNC:28972]
305	ENSG00000014216	-0.724276	7.18815	-3.83823	0.000437795	0.0195472	-0.316257	NOT	CAPN1	calpain 1 [Source:HGNC Symbol;Acc:HGNC:1476]
306	ENSG00000014257	0.0349411	3.34922	0.126805	0.899739	0.944594	-6.38493	NOT	ACP3	acid phosphatase 3 [Source:HGNC Symbol;Acc:HGNC:125]
307	ENSG00000014824	-0.169449	5.22737	-1.25184	0.218004	0.401009	-5.79581	NOT	SLC30A9	solute carrier family 30 member 9 [Source:HGNC Symbol;Acc:HGNC:1329]
308	ENSG00000014914	-0.413938	4.22572	-1.99337	0.0531722	0.174852	-4.59453	NOT	MTMR11	myotubularin related protein 11 [Source:HGNC Symbol;Acc:HGNC:24307]
309	ENSG00000015133	-0.443574	8.15667	-2.42112	0.0201726	0.103521	-3.84156	NOT	CCDC88C	coiled-coil domain containing 88C [Source:HGNC Symbol;Acc:HGNC:19967]
310	ENSG00000015153	0.626314	5.46716	2.93428	0.00554909	0.0551479	-2.67108	NOT	YAF2	YY1 associated factor 2 [Source:HGNC Symbol;Acc:HGNC:17363]
311	ENSG00000015171	-0.386336	5.41262	-2.21289	0.0327607	0.133952	-4.25552	NOT	ZMYND11	zinc finger MYND-type containing 11 [Source:HGNC Symbol;Acc:HGNC:16966]
312	ENSG00000015285	-0.496447	7.98582	-2.51123	0.0162352	0.0931145	-3.65016	NOT	WAS	WASP actin nucleation promoting factor [Source:HGNC Symbol;Acc:HGNC:12731]
313	ENSG00000015475	0.731785	7.34834	2.94343	0.00541686	0.0545979	-2.66153	NOT	BID	BH3 interacting domain death agonist [Source:HGNC Symbol;Acc:HGNC:1050]
314	ENSG00000015520	0.960758	-1.8638	2.29961	0.0268486	0.119683	-3.51328	NOT	NPC1L1	NPC1 like intracellular cholesterol transporter 1 [Source:HGNC Symbol;Acc:HGNC:7898]
315	ENSG00000015532	-0.415611	4.974	-2.58616	0.0135097	0.0852561	-3.45213	NOT	XYLT2	xylosyltransferase 2 [Source:HGNC Symbol;Acc:HGNC:15517]
20483	ENSG00000285402	1.01582	-3.52431	2.4667	0.018084	0.0986149	-3.15543	UP	AC244230.2	novel transcript
317	ENSG00000015592	0.453342	-2.84147	1.42111	0.163147	0.337071	-4.86381	NOT	STMN4	stathmin 4 [Source:HGNC Symbol;Acc:HGNC:16078]
318	ENSG00000015676	-0.36126	5.89836	-2.59539	0.0132047	0.084167	-3.46503	NOT	NUDCD3	NudC domain containing 3 [Source:HGNC Symbol;Acc:HGNC:22208]
319	ENSG00000016391	-0.357317	0.0422095	-1.23925	0.222581	0.405692	-5.24571	NOT	CHDH	choline dehydrogenase [Source:HGNC Symbol;Acc:HGNC:24288]
320	ENSG00000016864	-0.544801	4.09942	-2.58317	0.0136101	0.0856186	-3.39253	NOT	GLT8D1	glycosyltransferase 8 domain containing 1 [Source:HGNC Symbol;Acc:HGNC:24870]
321	ENSG00000017260	0.0143866	5.79311	0.106559	0.915679	0.954119	-6.58351	NOT	ATP2C1	ATPase secretory pathway Ca2+ transporting 1 [Source:HGNC Symbol;Acc:HGNC:13211]
322	ENSG00000017483	-0.28156	4.15925	-0.900525	0.373308	0.560071	-6.08261	NOT	SLC38A5	solute carrier family 38 member 5 [Source:HGNC Symbol;Acc:HGNC:18070]
323	ENSG00000017797	-0.397887	5.707	-2.47264	0.0178267	0.0980114	-3.7289	NOT	RALBP1	ralA binding protein 1 [Source:HGNC Symbol;Acc:HGNC:9841]
324	ENSG00000018189	-0.185974	5.9368	-1.32707	0.19212	0.371199	-5.7247	NOT	RUFY3	RUN and FYVE domain containing 3 [Source:HGNC Symbol;Acc:HGNC:30285]
325	ENSG00000018236	0.994393	-2.69111	1.71859	0.0935333	0.241159	-4.46471	NOT	CNTN1	contactin 1 [Source:HGNC Symbol;Acc:HGNC:2171]
326	ENSG00000018280	-0.239239	9.22499	-0.951246	0.347275	0.535194	-6.1214	NOT	SLC11A1	solute carrier family 11 member 1 [Source:HGNC Symbol;Acc:HGNC:10907]
327	ENSG00000018408	0.136325	1.04935	0.560895	0.578043	0.731181	-5.93492	NOT	WWTR1	WW domain containing transcription regulator 1 [Source:HGNC Symbol;Acc:HGNC:24042]
328	ENSG00000018510	-0.00550826	5.23558	-0.0396524	0.96857	0.98251	-6.56903	NOT	AGPS	alkylglycerone phosphate synthase [Source:HGNC Symbol;Acc:HGNC:327]
329	ENSG00000018610	0.240247	4.36576	1.48276	0.146088	0.314977	-5.43825	NOT	CXorf56	chromosome X open reading frame 56 [Source:HGNC Symbol;Acc:HGNC:26239]
330	ENSG00000018625	0.153128	-3.201	0.407294	0.685995	0.807885	-5.68234	NOT	ATP1A2	ATPase Na+/K+ transporting subunit alpha 2 [Source:HGNC Symbol;Acc:HGNC:800]
331	ENSG00000018699	-0.187242	4.05672	-1.29605	0.202494	0.383484	-5.65249	NOT	TTC27	tetratricopeptide repeat domain 27 [Source:HGNC Symbol;Acc:HGNC:25986]
332	ENSG00000018869	-0.184479	0.0831503	-0.704872	0.485033	0.658811	-5.73568	NOT	ZNF582	zinc finger protein 582 [Source:HGNC Symbol;Acc:HGNC:26421]
333	ENSG00000019102	-0.132273	3.80113	-0.466212	0.64363	0.779843	-6.33878	NOT	VSIG2	V-set and immunoglobulin domain containing 2 [Source:HGNC Symbol;Acc:HGNC:17149]
334	ENSG00000019144	-0.0681655	0.426685	-0.253669	0.801069	0.884519	-5.97994	NOT	PHLDB1	pleckstrin homology like domain family B member 1 [Source:HGNC Symbol;Acc:HGNC:23697]
335	ENSG00000019169	-0.113913	3.45813	-0.283891	0.777979	0.869775	-6.36493	NOT	MARCO	macrophage receptor with collagenous structure [Source:HGNC Symbol;Acc:HGNC:6895]
336	ENSG00000019186	-0.49668	-2.83548	-1.12136	0.268917	0.455247	-5.20077	NOT	CYP24A1	cytochrome P450 family 24 subfamily A member 1 [Source:HGNC Symbol;Acc:HGNC:2602]
337	ENSG00000019485	-0.221264	2.40425	-1.10927	0.274036	0.461053	-5.66342	NOT	PRDM11	PR/SET domain 11 [Source:HGNC Symbol;Acc:HGNC:13996]
338	ENSG00000019582	-0.785113	11.3849	-3.28562	0.00214175	0.036831	-1.74883	NOT	CD74	CD74 molecule [Source:HGNC Symbol;Acc:HGNC:1697]
339	ENSG00000019991	-0.606192	2.49038	-1.89272	0.0657533	0.19687	-4.57567	NOT	HGF	hepatocyte growth factor [Source:HGNC Symbol;Acc:HGNC:4893]
340	ENSG00000019995	0.765323	4.24429	3.4054	0.00153127	0.0329502	-1.41898	NOT	ZRANB1	zinc finger RANBP2-type containing 1 [Source:HGNC Symbol;Acc:HGNC:18224]
341	ENSG00000020129	-0.68088	3.67631	-2.9901	0.00478651	0.0519843	-2.40956	NOT	NCDN	neurochondrin [Source:HGNC Symbol;Acc:HGNC:17597]
342	ENSG00000020181	-0.494284	2.42121	-2.10805	0.0414325	0.152184	-4.18364	NOT	ADGRA2	adhesion G protein-coupled receptor A2 [Source:HGNC Symbol;Acc:HGNC:17849]
343	ENSG00000020256	-0.37464	3.31246	-2.21355	0.0327111	0.133802	-4.0856	NOT	ZFP64	ZFP64 zinc finger protein [Source:HGNC Symbol;Acc:HGNC:15940]
344	ENSG00000020426	0.694445	3.01144	3.04242	0.00416207	0.0484019	-2.23027	NOT	MNAT1	MNAT1 component of CDK activating kinase [Source:HGNC Symbol;Acc:HGNC:7181]
345	ENSG00000020577	-0.248669	4.12972	-1.29407	0.203169	0.384341	-5.66151	NOT	SAMD4A	sterile alpha motif domain containing 4A [Source:HGNC Symbol;Acc:HGNC:23023]
346	ENSG00000020633	-0.159698	9.07446	-0.696654	0.490107	0.662924	-6.33123	NOT	RUNX3	RUNX family transcription factor 3 [Source:HGNC Symbol;Acc:HGNC:10473]
347	ENSG00000020922	-0.0729315	5.56259	-0.595924	0.554632	0.71297	-6.40444	NOT	MRE11	MRE11 homolog, double strand break repair nuclease [Source:HGNC Symbol;Acc:HGNC:7230]
348	ENSG00000021300	-0.506037	3.48842	-1.92136	0.0619365	0.190357	-4.64359	NOT	PLEKHB1	pleckstrin homology domain containing B1 [Source:HGNC Symbol;Acc:HGNC:19079]
349	ENSG00000021355	-0.0761364	7.80419	-0.518785	0.60681	0.752649	-6.45673	NOT	SERPINB1	serpin family B member 1 [Source:HGNC Symbol;Acc:HGNC:3311]
350	ENSG00000021461	-0.291371	-1.49896	-0.905506	0.370698	0.557854	-5.46378	NOT	CYP3A43	cytochrome P450 family 3 subfamily A member 43 [Source:HGNC Symbol;Acc:HGNC:17450]
351	ENSG00000021488	-0.724688	-1.21777	-2.2052	0.0333372	0.135323	-3.70784	NOT	SLC7A9	solute carrier family 7 member 9 [Source:HGNC Symbol;Acc:HGNC:11067]
352	ENSG00000021574	0.0826117	4.862	0.643681	0.523509	0.689516	-6.34245	NOT	SPAST	spastin [Source:HGNC Symbol;Acc:HGNC:11233]
353	ENSG00000021645	0.340183	-0.700816	0.488657	0.627792	0.768222	-5.78918	NOT	NRXN3	neurexin 3 [Source:HGNC Symbol;Acc:HGNC:8010]
354	ENSG00000021762	-0.457595	6.72474	-2.56131	0.0143632	0.0877198	-3.54753	NOT	OSBPL5	oxysterol binding protein like 5 [Source:HGNC Symbol;Acc:HGNC:16392]
355	ENSG00000021776	-0.0421865	5.72935	-0.319881	0.750748	0.85227	-6.53594	NOT	AQR	aquarius intron-binding spliceosomal factor [Source:HGNC Symbol;Acc:HGNC:29513]
356	ENSG00000021826	-0.00968331	-1.566	-0.0251111	0.980093	0.989548	-5.84211	NOT	CPS1	carbamoyl-phosphate synthase 1 [Source:HGNC Symbol;Acc:HGNC:2323]
357	ENSG00000022267	-0.139129	3.71981	-0.659934	0.513133	0.681442	-6.22091	NOT	FHL1	four and a half LIM domains 1 [Source:HGNC Symbol;Acc:HGNC:3702]
358	ENSG00000022277	0.468802	5.1459	2.53554	0.0153005	0.0902749	-3.57746	NOT	RTF2	replication termination factor 2 [Source:HGNC Symbol;Acc:HGNC:15890]
359	ENSG00000022556	-0.496679	3.14369	-1.9927	0.0532489	0.174867	-4.47856	NOT	NLRP2	NLR family pyrin domain containing 2 [Source:HGNC Symbol;Acc:HGNC:22948]
20455	ENSG00000285106	3.59265	0.818119	5.71759	1.23405e-06	0.000979133	5.27127	UP	AC016831.6	novel transcript
361	ENSG00000022840	0.0239292	8.07161	0.112776	0.910781	0.951318	-6.58221	NOT	RNF10	ring finger protein 10 [Source:HGNC Symbol;Acc:HGNC:10055]
362	ENSG00000022976	-0.0763024	4.80948	-0.717273	0.477434	0.652254	-6.28773	NOT	ZNF839	zinc finger protein 839 [Source:HGNC Symbol;Acc:HGNC:20345]
363	ENSG00000023041	-0.128016	5.6171	-1.43954	0.157889	0.330516	-5.56811	NOT	ZDHHC6	zinc finger DHHC-type palmitoyltransferase 6 [Source:HGNC Symbol;Acc:HGNC:19160]
364	ENSG00000023171	-0.319011	4.79681	-2.2709	0.0286906	0.124507	-4.11013	NOT	GRAMD1B	GRAM domain containing 1B [Source:HGNC Symbol;Acc:HGNC:29214]
365	ENSG00000023191	-0.610755	7.67724	-3.39695	0.00156824	0.0332176	-1.51218	NOT	RNH1	ribonuclease/angiogenin inhibitor 1 [Source:HGNC Symbol;Acc:HGNC:10074]
366	ENSG00000023228	-0.34091	5.18033	-3.15542	0.0030656	0.0430972	-2.11168	NOT	NDUFS1	NADH:ubiquinone oxidoreductase core subunit S1 [Source:HGNC Symbol;Acc:HGNC:7707]
20441	ENSG00000284999	2.66637	-1.53533	5.41234	3.285e-06	0.00189088	4.20878	UP	AL591518.1	novel transcript
368	ENSG00000023318	0.159052	6.50416	1.37374	0.177283	0.354834	-5.67104	NOT	ERP44	endoplasmic reticulum protein 44 [Source:HGNC Symbol;Acc:HGNC:18311]
369	ENSG00000023330	0.461493	5.547	2.81854	0.00750653	0.0636826	-2.9492	NOT	ALAS1	5'-aminolevulinate synthase 1 [Source:HGNC Symbol;Acc:HGNC:396]
370	ENSG00000023445	0.0602525	6.83409	0.292261	0.77162	0.865926	-6.55563	NOT	BIRC3	baculoviral IAP repeat containing 3 [Source:HGNC Symbol;Acc:HGNC:591]
371	ENSG00000023516	-0.28431	5.1517	-1.24312	0.221165	0.404356	-5.80136	NOT	AKAP11	A-kinase anchoring protein 11 [Source:HGNC Symbol;Acc:HGNC:369]
372	ENSG00000023572	-0.208819	2.92407	-1.14958	0.257244	0.442667	-5.68798	NOT	GLRX2	glutaredoxin 2 [Source:HGNC Symbol;Acc:HGNC:16065]
20420	ENSG00000284730	-1.12766	-2.76595	-3.44894	0.00135377	0.0311615	-1.01294	DOWN	TMDD1	transmembrane and death domain 1 [Source:HGNC Symbol;Acc:HGNC:53646]
374	ENSG00000023697	-0.26669	4.65025	-1.70303	0.0964347	0.244925	-5.12693	NOT	DERA	deoxyribose-phosphate aldolase [Source:HGNC Symbol;Acc:HGNC:24269]
375	ENSG00000023734	0.400664	6.57286	2.794	0.00799683	0.0659624	-3.01985	NOT	STRAP	serine/threonine kinase receptor associated protein [Source:HGNC Symbol;Acc:HGNC:30796]
376	ENSG00000023839	0.106112	2.2675	0.63936	0.526286	0.691805	-6.04659	NOT	ABCC2	ATP binding cassette subfamily C member 2 [Source:HGNC Symbol;Acc:HGNC:53]
377	ENSG00000023892	-0.427222	8.20631	-2.68935	0.0104406	0.0748477	-3.25131	NOT	DEF6	DEF6 guanine nucleotide exchange factor [Source:HGNC Symbol;Acc:HGNC:2760]
378	ENSG00000023902	-0.577714	7.40743	-3.27172	0.002226	0.0373197	-1.84009	NOT	PLEKHO1	pleckstrin homology domain containing O1 [Source:HGNC Symbol;Acc:HGNC:24310]
379	ENSG00000023909	0.0264236	3.49753	0.159654	0.873968	0.929691	-6.39957	NOT	GCLM	glutamate-cysteine ligase modifier subunit [Source:HGNC Symbol;Acc:HGNC:4312]
380	ENSG00000024048	-0.225221	7.38499	-1.48418	0.145712	0.314394	-5.51725	NOT	UBR2	ubiquitin protein ligase E3 component n-recognin 2 [Source:HGNC Symbol;Acc:HGNC:21289]
381	ENSG00000024422	0.662149	-1.65944	1.58261	0.121499	0.282096	-4.70064	NOT	EHD2	EH domain containing 2 [Source:HGNC Symbol;Acc:HGNC:3243]
382	ENSG00000024526	-0.496602	-2.62011	-1.25369	0.217339	0.400159	-5.06912	NOT	DEPDC1	DEP domain containing 1 [Source:HGNC Symbol;Acc:HGNC:22949]
383	ENSG00000024862	0.46431	5.24192	2.6882	0.010471	0.074848	-3.24083	NOT	CCDC28A	coiled-coil domain containing 28A [Source:HGNC Symbol;Acc:HGNC:21098]
20410	ENSG00000284686	1.00732	-2.18096	2.3159	0.0258508	0.116847	-3.47345	UP	AC119674.2	novel transcript
385	ENSG00000025156	0.383354	4.90954	2.1994	0.0337778	0.13607	-4.26361	NOT	HSF2	heat shock transcription factor 2 [Source:HGNC Symbol;Acc:HGNC:5225]
386	ENSG00000025293	0.739837	6.89308	4.44066	7.05627e-05	0.00902592	1.41651	NOT	PHF20	PHD finger protein 20 [Source:HGNC Symbol;Acc:HGNC:16098]
387	ENSG00000025423	-0.81969	-1.74886	-2.24061	0.0307557	0.129405	-3.62366	NOT	HSD17B6	hydroxysteroid 17-beta dehydrogenase 6 [Source:HGNC Symbol;Acc:HGNC:23316]
388	ENSG00000025434	-0.707732	2.23898	-3.03567	0.00423813	0.0487361	-2.16483	NOT	NR1H3	nuclear receptor subfamily 1 group H member 3 [Source:HGNC Symbol;Acc:HGNC:7966]
20407	ENSG00000284677	-1.2084	-0.463977	-3.96482	0.000300428	0.016426	0.30082	DOWN	AL031985.4	novel transcript
390	ENSG00000025770	0.379407	6.15673	1.91131	0.0632534	0.192473	-4.83929	NOT	NCAPH2	non-SMC condensin II complex subunit H2 [Source:HGNC Symbol;Acc:HGNC:25071]
391	ENSG00000025772	0.494312	0.363839	2.09809	0.0423534	0.154131	-4.00144	NOT	TOMM34	translocase of outer mitochondrial membrane 34 [Source:HGNC Symbol;Acc:HGNC:15746]
392	ENSG00000025796	0.1684	6.37135	1.65637	0.105585	0.258409	-5.26369	NOT	SEC63	SEC63 homolog, protein translocation regulator [Source:HGNC Symbol;Acc:HGNC:21082]
393	ENSG00000025800	0.548862	4.51219	3.30778	0.00201366	0.0362528	-1.69179	NOT	KPNA6	karyopherin subunit alpha 6 [Source:HGNC Symbol;Acc:HGNC:6399]
394	ENSG00000026025	-0.471012	9.60578	-2.82141	0.00745113	0.0635662	-2.92611	NOT	VIM	vimentin [Source:HGNC Symbol;Acc:HGNC:12692]
395	ENSG00000026036	-0.379313	0.0578166	-1.34265	0.187063	0.365519	-5.12433	NOT	RTEL1-TNFRSF6B	RTEL1-TNFRSF6B readthrough (NMD candidate) [Source:HGNC Symbol;Acc:HGNC:44095]
396	ENSG00000026103	0.484844	5.26284	2.31811	0.025718	0.116414	-4.04259	NOT	FAS	Fas cell surface death receptor [Source:HGNC Symbol;Acc:HGNC:11920]
397	ENSG00000026297	-0.135097	6.46865	-0.783732	0.43788	0.617724	-6.29103	NOT	RNASET2	ribonuclease T2 [Source:HGNC Symbol;Acc:HGNC:21686]
398	ENSG00000026508	-0.14708	9.20648	-0.809937	0.422838	0.605657	-6.24436	NOT	CD44	CD44 molecule (Indian blood group) [Source:HGNC Symbol;Acc:HGNC:1681]
399	ENSG00000026559	0.255297	-1.32408	0.539857	0.592332	0.74165	-5.7205	NOT	KCNG1	potassium voltage-gated channel modifier subfamily G member 1 [Source:HGNC Symbol;Acc:HGNC:6248]
400	ENSG00000026652	-0.421605	5.78024	-2.46569	0.018128	0.0987318	-3.74543	NOT	AGPAT4	1-acylglycerol-3-phosphate O-acyltransferase 4 [Source:HGNC Symbol;Acc:HGNC:20885]
401	ENSG00000026751	-0.142845	5.77205	-0.598927	0.552648	0.7117	-6.40824	NOT	SLAMF7	SLAM family member 7 [Source:HGNC Symbol;Acc:HGNC:21394]
402	ENSG00000026950	-0.663608	7.79616	-2.78484	0.00818749	0.0667834	-3.03498	NOT	BTN3A1	butyrophilin subfamily 3 member A1 [Source:HGNC Symbol;Acc:HGNC:1138]
403	ENSG00000027001	0.00993984	3.16984	0.0605426	0.952029	0.972731	-6.36741	NOT	MIPEP	mitochondrial intermediate peptidase [Source:HGNC Symbol;Acc:HGNC:7104]
404	ENSG00000027075	0.919711	6.35631	2.81281	0.00761849	0.0642795	-2.97437	NOT	PRKCH	protein kinase C eta [Source:HGNC Symbol;Acc:HGNC:9403]
405	ENSG00000027697	0.631036	8.09789	3.33988	0.00184093	0.0348892	-1.65781	NOT	IFNGR1	interferon gamma receptor 1 [Source:HGNC Symbol;Acc:HGNC:5439]
406	ENSG00000027847	-0.293281	4.694	-2.23727	0.0309909	0.129973	-4.1703	NOT	B4GALT7	beta-1,4-galactosyltransferase 7 [Source:HGNC Symbol;Acc:HGNC:930]
407	ENSG00000027869	-0.247571	5.87113	-0.482916	0.631826	0.771293	-6.47207	NOT	SH2D2A	SH2 domain containing 2A [Source:HGNC Symbol;Acc:HGNC:10821]
408	ENSG00000028116	-0.0471917	5.09314	-0.249835	0.804012	0.88654	-6.53099	NOT	VRK2	VRK serine/threonine kinase 2 [Source:HGNC Symbol;Acc:HGNC:12719]
409	ENSG00000028137	-0.151947	9.99288	-0.830896	0.411036	0.595321	-6.21222	NOT	TNFRSF1B	TNF receptor superfamily member 1B [Source:HGNC Symbol;Acc:HGNC:11917]
410	ENSG00000028203	0.347444	4.70682	2.15569	0.0372686	0.142859	-4.33615	NOT	VEZT	vezatin, adherens junctions transmembrane protein [Source:HGNC Symbol;Acc:HGNC:18258]
411	ENSG00000028277	-0.559917	7.24	-2.6844	0.0105716	0.0752025	-3.27043	NOT	POU2F2	POU class 2 homeobox 2 [Source:HGNC Symbol;Acc:HGNC:9213]
412	ENSG00000028310	-0.23617	6.45955	-1.6323	0.110578	0.265979	-5.30046	NOT	BRD9	bromodomain containing 9 [Source:HGNC Symbol;Acc:HGNC:25818]
413	ENSG00000028528	-0.283428	7.17168	-2.13568	0.0389707	0.147122	-4.42673	NOT	SNX1	sorting nexin 1 [Source:HGNC Symbol;Acc:HGNC:11172]
414	ENSG00000028839	0.163448	4.14908	1.35091	0.184428	0.362257	-5.59563	NOT	TBPL1	TATA-box binding protein like 1 [Source:HGNC Symbol;Acc:HGNC:11589]
415	ENSG00000029153	0.437376	-0.411979	1.17352	0.247626	0.432803	-5.2826	NOT	ARNTL2	aryl hydrocarbon receptor nuclear translocator like 2 [Source:HGNC Symbol;Acc:HGNC:18984]
416	ENSG00000029363	0.341637	7.78623	2.21139	0.032872	0.13424	-4.27452	NOT	BCLAF1	BCL2 associated transcription factor 1 [Source:HGNC Symbol;Acc:HGNC:16863]
417	ENSG00000029364	-0.177282	5.01127	-1.97575	0.0552106	0.17879	-4.68769	NOT	SLC39A9	solute carrier family 39 member 9 [Source:HGNC Symbol;Acc:HGNC:20182]
418	ENSG00000029534	0.177472	3.804	0.456077	0.650837	0.7847	-6.34679	NOT	ANK1	ankyrin 1 [Source:HGNC Symbol;Acc:HGNC:492]
419	ENSG00000029639	-0.478886	3.19711	-2.79183	0.00804161	0.0661525	-2.83524	NOT	TFB1M	transcription factor B1, mitochondrial [Source:HGNC Symbol;Acc:HGNC:17037]
420	ENSG00000029725	0.287096	4.83623	1.97058	0.055822	0.179982	-4.68981	NOT	RABEP1	rabaptin, RAB GTPase binding effector protein 1 [Source:HGNC Symbol;Acc:HGNC:17677]
421	ENSG00000029993	0.062351	2.25619	0.273281	0.786063	0.87499	-6.20789	NOT	HMGB3	high mobility group box 3 [Source:HGNC Symbol;Acc:HGNC:5004]
422	ENSG00000030066	-0.104451	5.57661	-0.799404	0.428846	0.610447	-6.26366	NOT	NUP160	nucleoporin 160 [Source:HGNC Symbol;Acc:HGNC:18017]
423	ENSG00000030304	-0.171913	-0.861205	-0.412863	0.681944	0.805015	-5.80657	NOT	MUSK	muscle associated receptor tyrosine kinase [Source:HGNC Symbol;Acc:HGNC:7525]
20406	ENSG00000284669	1.65896	-2.06046	2.80081	0.00785801	0.0653426	-2.49637	UP	AC092053.4	novel transcript, antisense CSRNP1
20373	ENSG00000284194	-1.36735	1.78869	-3.68865	0.000679248	0.0238451	-0.470757	DOWN	SCO2	synthesis of cytochrome C oxidase 2 [Source:HGNC Symbol;Acc:HGNC:10604]
426	ENSG00000031003	0.613824	5.03582	2.61247	0.012657	0.0821928	-3.40234	NOT	FAM13B	family with sequence similarity 13 member B [Source:HGNC Symbol;Acc:HGNC:1335]
427	ENSG00000031081	-0.391866	5.28333	-2.4553	0.0185869	0.0999628	-3.75208	NOT	ARHGAP31	Rho GTPase activating protein 31 [Source:HGNC Symbol;Acc:HGNC:29216]
428	ENSG00000031691	-0.43513	0.617705	-1.44767	0.155614	0.327407	-5.04404	NOT	CENPQ	centromere protein Q [Source:HGNC Symbol;Acc:HGNC:21347]
429	ENSG00000031698	-0.142768	6.52552	-1.12349	0.268025	0.45439	-5.97279	NOT	SARS1	seryl-tRNA synthetase 1 [Source:HGNC Symbol;Acc:HGNC:10537]
430	ENSG00000031823	-0.128621	6.78894	-1.30033	0.201036	0.381769	-5.76534	NOT	RANBP3	RAN binding protein 3 [Source:HGNC Symbol;Acc:HGNC:9850]
431	ENSG00000032219	0.802337	5.59878	2.86875	0.00658935	0.0594965	-2.83134	NOT	ARID4A	AT-rich interaction domain 4A [Source:HGNC Symbol;Acc:HGNC:9885]
432	ENSG00000032389	-0.298892	5.07836	-2.39004	0.0217197	0.107098	-3.88164	NOT	EIPR1	EARP complex and GARP complex interacting protein 1 [Source:HGNC Symbol;Acc:HGNC:12383]
433	ENSG00000032444	-0.219917	7.71453	-1.44162	0.157305	0.329663	-5.57384	NOT	PNPLA6	patatin like phospholipase domain containing 6 [Source:HGNC Symbol;Acc:HGNC:16268]
434	ENSG00000032742	0.157624	4.0279	1.11923	0.269816	0.456343	-5.85897	NOT	IFT88	intraflagellar transport 88 [Source:HGNC Symbol;Acc:HGNC:20606]
435	ENSG00000033011	-0.943115	2.47635	-3.80826	0.000478306	0.0199515	-0.19273	NOT	ALG1	ALG1 chitobiosyldiphosphodolichol beta-mannosyltransferase [Source:HGNC Symbol;Acc:HGNC:18294]
436	ENSG00000033030	0.19588	5.5204	1.55928	0.126921	0.289437	-5.39597	NOT	ZCCHC8	zinc finger CCHC-type containing 8 [Source:HGNC Symbol;Acc:HGNC:25265]
437	ENSG00000033100	-0.311701	6.41827	-2.68273	0.0106164	0.0753144	-3.27499	NOT	CHPF2	chondroitin polymerizing factor 2 [Source:HGNC Symbol;Acc:HGNC:29270]
438	ENSG00000033122	0.599413	0.267139	1.7551	0.087011	0.230627	-4.57215	NOT	LRRC7	leucine rich repeat containing 7 [Source:HGNC Symbol;Acc:HGNC:18531]
439	ENSG00000033170	0.15351	4.466	0.776633	0.44201	0.621646	-6.21909	NOT	FUT8	fucosyltransferase 8 [Source:HGNC Symbol;Acc:HGNC:4019]
440	ENSG00000033178	0.510491	5.81768	2.55662	0.0145298	0.0881844	-3.55186	NOT	UBA6	ubiquitin like modifier activating enzyme 6 [Source:HGNC Symbol;Acc:HGNC:25581]
441	ENSG00000033327	0.978936	7.09551	4.16914	0.000162245	0.012452	0.623864	NOT	GAB2	GRB2 associated binding protein 2 [Source:HGNC Symbol;Acc:HGNC:14458]
442	ENSG00000033627	0.51247	6.42832	3.56833	0.000962415	0.0277373	-1.05971	NOT	ATP6V0A1	ATPase H+ transporting V0 subunit a1 [Source:HGNC Symbol;Acc:HGNC:865]
443	ENSG00000033800	0.866462	6.32182	3.14094	0.00318898	0.0436968	-2.17504	NOT	PIAS1	protein inhibitor of activated STAT 1 [Source:HGNC Symbol;Acc:HGNC:2752]
444	ENSG00000033867	-0.137699	6.00303	-0.725262	0.472574	0.648414	-6.32987	NOT	SLC4A7	solute carrier family 4 member 7 [Source:HGNC Symbol;Acc:HGNC:11033]
445	ENSG00000034053	-0.456914	6.93162	-1.92764	0.0611262	0.188777	-4.8116	NOT	APBA2	amyloid beta precursor protein binding family A member 2 [Source:HGNC Symbol;Acc:HGNC:579]
446	ENSG00000034152	0.364428	7.86663	1.69122	0.0986856	0.248744	-5.2023	NOT	MAP2K3	mitogen-activated protein kinase kinase 3 [Source:HGNC Symbol;Acc:HGNC:6843]
447	ENSG00000034239	0.282281	-2.66309	0.677883	0.501805	0.672548	-5.57217	NOT	EFCAB1	EF-hand calcium binding domain 1 [Source:HGNC Symbol;Acc:HGNC:25678]
448	ENSG00000034533	0.117621	2.17562	0.596194	0.554453	0.712854	-6.06001	NOT	ASTE1	asteroid homolog 1 [Source:HGNC Symbol;Acc:HGNC:25021]
449	ENSG00000034677	0.793512	5.81602	2.18806	0.034654	0.137593	-4.31892	NOT	RNF19A	ring finger protein 19A, RBR E3 ubiquitin protein ligase [Source:HGNC Symbol;Acc:HGNC:13432]
450	ENSG00000034693	0.0359648	2.105	0.110328	0.912709	0.952608	-6.21823	NOT	PEX3	peroxisomal biogenesis factor 3 [Source:HGNC Symbol;Acc:HGNC:8858]
451	ENSG00000035115	-0.185683	4.92857	-1.08844	0.283007	0.470368	-5.96475	NOT	SH3YL1	SH3 and SYLF domain containing 1 [Source:HGNC Symbol;Acc:HGNC:29546]
452	ENSG00000035141	-0.261844	4.79318	-1.94427	0.0590217	0.185381	-4.72981	NOT	FAM136A	family with sequence similarity 136 member A [Source:HGNC Symbol;Acc:HGNC:25911]
453	ENSG00000035403	-0.242853	7.01016	-1.32182	0.193847	0.373595	-5.73749	NOT	VCL	vinculin [Source:HGNC Symbol;Acc:HGNC:12665]
454	ENSG00000035499	-0.310883	-0.134841	-1.03656	0.306255	0.494576	-5.44339	NOT	DEPDC1B	DEP domain containing 1B [Source:HGNC Symbol;Acc:HGNC:24902]
455	ENSG00000035664	0.767262	4.49904	2.25094	0.0300368	0.12786	-4.13391	NOT	DAPK2	death associated protein kinase 2 [Source:HGNC Symbol;Acc:HGNC:2675]
456	ENSG00000035681	0.145123	5.6612	1.0228	0.312637	0.500522	-6.067	NOT	NSMAF	neutral sphingomyelinase activation associated factor [Source:HGNC Symbol;Acc:HGNC:8017]
457	ENSG00000035687	0.027322	5.79191	0.139359	0.889876	0.93871	-6.57945	NOT	ADSS2	adenylosuccinate synthase 2 [Source:HGNC Symbol;Acc:HGNC:292]
458	ENSG00000035720	0.194761	3.58366	0.677182	0.502245	0.673015	-6.19639	NOT	STAP1	signal transducing adaptor family member 1 [Source:HGNC Symbol;Acc:HGNC:24133]
459	ENSG00000035862	-0.0126781	6.73623	-0.0890041	0.929529	0.960787	-6.59463	NOT	TIMP2	TIMP metallopeptidase inhibitor 2 [Source:HGNC Symbol;Acc:HGNC:11821]
460	ENSG00000035928	0.323056	5.43748	2.01792	0.0504408	0.169902	-4.63223	NOT	RFC1	replication factor C subunit 1 [Source:HGNC Symbol;Acc:HGNC:9969]
461	ENSG00000036054	0.931728	5.7177	4.10338	0.000198043	0.0138176	0.441012	NOT	TBC1D23	TBC1 domain family member 23 [Source:HGNC Symbol;Acc:HGNC:25622]
462	ENSG00000036257	0.481679	6.83137	2.17297	0.0358519	0.13991	-4.35621	NOT	CUL3	cullin 3 [Source:HGNC Symbol;Acc:HGNC:2553]
463	ENSG00000036448	0.178934	4.86763	0.252858	0.801691	0.884922	-6.51795	NOT	MYOM2	myomesin 2 [Source:HGNC Symbol;Acc:HGNC:7614]
464	ENSG00000036530	-0.533822	-0.195487	-1.86045	0.0702915	0.203206	-4.36189	NOT	CYP46A1	cytochrome P450 family 46 subfamily A member 1 [Source:HGNC Symbol;Acc:HGNC:2641]
465	ENSG00000036549	-0.0343917	4.90646	-0.236461	0.814299	0.892658	-6.52339	NOT	AC118549.1	zinc finger ZZ-type containing 3 [Source:NCBI gene;Acc:26009]
20358	ENSG00000283765	-1.154	-0.279838	-3.37502	0.00166813	0.0338434	-1.2013	DOWN	AC131160.1	presenilin associated rhomboid like [Source:NCBI gene;Acc:55486]
467	ENSG00000036672	0.44893	-1.83223	0.985465	0.330405	0.518568	-5.37914	NOT	USP2	ubiquitin specific peptidase 2 [Source:HGNC Symbol;Acc:HGNC:12618]
468	ENSG00000036828	0.778281	-2.43988	1.79001	0.0811336	0.220806	-4.36584	NOT	CASR	calcium sensing receptor [Source:HGNC Symbol;Acc:HGNC:1514]
469	ENSG00000037042	-0.347565	3.32709	-2.04261	0.0478175	0.164575	-4.41121	NOT	TUBG2	tubulin gamma 2 [Source:HGNC Symbol;Acc:HGNC:12419]
470	ENSG00000037241	-0.0784574	2.72282	-0.502134	0.618366	0.761444	-6.18363	NOT	RPL26L1	ribosomal protein L26 like 1 [Source:HGNC Symbol;Acc:HGNC:17050]
471	ENSG00000037280	-0.26786	2.42504	-0.662056	0.511787	0.680581	-6.04715	NOT	FLT4	fms related receptor tyrosine kinase 4 [Source:HGNC Symbol;Acc:HGNC:3767]
472	ENSG00000037474	-0.269025	6.35839	-2.31804	0.0257227	0.116414	-4.06427	NOT	NSUN2	NOP2/Sun RNA methyltransferase 2 [Source:HGNC Symbol;Acc:HGNC:25994]
473	ENSG00000037637	0.289568	5.4027	2.66087	0.0112162	0.0770931	-3.30846	NOT	FBXO42	F-box protein 42 [Source:HGNC Symbol;Acc:HGNC:29249]
474	ENSG00000037749	0.159229	3.67614	1.13479	0.263314	0.449418	-5.80258	NOT	MFAP3	microfibril associated protein 3 [Source:HGNC Symbol;Acc:HGNC:7034]
475	ENSG00000037757	-0.640603	4.23302	-3.32502	0.00191907	0.0353046	-1.61773	NOT	MRI1	methylthioribose-1-phosphate isomerase 1 [Source:HGNC Symbol;Acc:HGNC:28469]
476	ENSG00000037897	-0.364437	0.729158	-1.51933	0.136659	0.302257	-4.95846	NOT	METTL1	methyltransferase like 1 [Source:HGNC Symbol;Acc:HGNC:7030]
477	ENSG00000038002	-0.3146	3.99522	-2.23739	0.0309831	0.129966	-4.11147	NOT	AGA	aspartylglucosaminidase [Source:HGNC Symbol;Acc:HGNC:318]
478	ENSG00000038210	-0.364432	2.72604	-1.23673	0.223504	0.406588	-5.55948	NOT	PI4K2B	phosphatidylinositol 4-kinase type 2 beta [Source:HGNC Symbol;Acc:HGNC:18215]
479	ENSG00000038219	0.192335	6.50671	0.899846	0.373665	0.560378	-6.19518	NOT	BOD1L1	biorientation of chromosomes in cell division 1 like 1 [Source:HGNC Symbol;Acc:HGNC:31792]
480	ENSG00000038274	-0.499875	5.78572	-2.73727	0.00924647	0.0709387	-3.14025	NOT	MAT2B	methionine adenosyltransferase 2B [Source:HGNC Symbol;Acc:HGNC:6905]
481	ENSG00000038295	0.651782	-2.37574	1.42482	0.162078	0.335588	-4.87871	NOT	TLL1	tolloid like 1 [Source:HGNC Symbol;Acc:HGNC:11843]
482	ENSG00000038358	-0.0687936	6.20235	-0.494705	0.623554	0.76566	-6.47308	NOT	EDC4	enhancer of mRNA decapping 4 [Source:HGNC Symbol;Acc:HGNC:17157]
483	ENSG00000038382	-0.0553969	6.23612	-0.273286	0.78606	0.87499	-6.55875	NOT	TRIO	trio Rho guanine nucleotide exchange factor [Source:HGNC Symbol;Acc:HGNC:12303]
484	ENSG00000038427	-0.330268	7.62901	-1.3551	0.183099	0.360829	-5.69049	NOT	VCAN	versican [Source:HGNC Symbol;Acc:HGNC:2464]
485	ENSG00000038532	-0.0671642	5.93633	-0.752537	0.456198	0.633922	-6.309	NOT	CLEC16A	C-type lectin domain containing 16A [Source:HGNC Symbol;Acc:HGNC:29013]
486	ENSG00000038945	-0.745884	2.90445	-1.87958	0.0675704	0.199401	-4.64459	NOT	MSR1	macrophage scavenger receptor 1 [Source:HGNC Symbol;Acc:HGNC:7376]
487	ENSG00000039068	-0.00409672	-0.317637	-0.00951188	0.992459	0.995774	-5.93419	NOT	CDH1	cadherin 1 [Source:HGNC Symbol;Acc:HGNC:1748]
488	ENSG00000039123	0.300734	4.89371	1.67619	0.101613	0.252899	-5.18969	NOT	MTREX	Mtr4 exosome RNA helicase [Source:HGNC Symbol;Acc:HGNC:18734]
489	ENSG00000039139	0.505484	-2.92396	0.99342	0.326563	0.514369	-5.32073	NOT	DNAH5	dynein axonemal heavy chain 5 [Source:HGNC Symbol;Acc:HGNC:2950]
490	ENSG00000039319	0.561103	5.46168	2.41394	0.0205209	0.104217	-3.85049	NOT	ZFYVE16	zinc finger FYVE-type containing 16 [Source:HGNC Symbol;Acc:HGNC:20756]
491	ENSG00000039523	0.196736	6.91791	1.30967	0.197889	0.378254	-5.75365	NOT	RIPOR1	RHO family interacting cell polarization regulator 1 [Source:HGNC Symbol;Acc:HGNC:25836]
492	ENSG00000039537	0.0445034	-3.24332	0.120978	0.904323	0.94739	-5.75006	NOT	C6	complement C6 [Source:HGNC Symbol;Acc:HGNC:1339]
493	ENSG00000039560	0.181651	-1.09835	0.4321	0.668023	0.796019	-5.78379	NOT	RAI14	retinoic acid induced 14 [Source:HGNC Symbol;Acc:HGNC:14873]
494	ENSG00000039600	-0.733374	1.10269	-2.29536	0.0271142	0.120281	-3.6862	NOT	SOX30	SRY-box transcription factor 30 [Source:HGNC Symbol;Acc:HGNC:30635]
495	ENSG00000039650	-0.273145	6.09719	-1.9605	0.0570299	0.182313	-4.74947	NOT	PNKP	polynucleotide kinase 3'-phosphatase [Source:HGNC Symbol;Acc:HGNC:9154]
496	ENSG00000039987	0.0808024	-2.89217	0.210373	0.83446	0.905655	-5.75231	NOT	BEST2	bestrophin 2 [Source:HGNC Symbol;Acc:HGNC:17107]
497	ENSG00000040199	0.0313883	3.6237	0.206108	0.837767	0.907628	-6.4065	NOT	PHLPP2	PH domain and leucine rich repeat protein phosphatase 2 [Source:HGNC Symbol;Acc:HGNC:29149]
498	ENSG00000040275	-0.31481	2.13835	-1.98438	0.0542044	0.176552	-4.37787	NOT	SPDL1	spindle apparatus coiled-coil protein 1 [Source:HGNC Symbol;Acc:HGNC:26010]
499	ENSG00000040341	-0.164378	4.74296	-1.11783	0.270404	0.457077	-5.92141	NOT	STAU2	staufen double-stranded RNA binding protein 2 [Source:HGNC Symbol;Acc:HGNC:11371]
500	ENSG00000040487	0.254907	4.58952	1.49303	0.143388	0.311336	-5.4424	NOT	SLC66A1	solute carrier family 66 member 1 [Source:HGNC Symbol;Acc:HGNC:26001]
501	ENSG00000040531	-0.349486	4.12236	-2.35418	0.0236372	0.111523	-3.88681	NOT	CTNS	cystinosin, lysosomal cystine transporter [Source:HGNC Symbol;Acc:HGNC:2518]
502	ENSG00000040608	-0.68339	0.763251	-2.3483	0.0239655	0.11226	-3.55337	NOT	RTN4R	reticulon 4 receptor [Source:HGNC Symbol;Acc:HGNC:18601]
503	ENSG00000040633	-0.11324	3.81725	-0.626428	0.534644	0.698764	-6.25485	NOT	PHF23	PHD finger protein 23 [Source:HGNC Symbol;Acc:HGNC:28428]
504	ENSG00000040933	-0.403583	7.66029	-1.92308	0.0617141	0.18988	-4.81558	NOT	INPP4A	inositol polyphosphate-4-phosphatase type I A [Source:HGNC Symbol;Acc:HGNC:6074]
505	ENSG00000041353	0.18543	1.05026	0.529105	0.599699	0.747396	-5.95178	NOT	RAB27B	RAB27B, member RAS oncogene family [Source:HGNC Symbol;Acc:HGNC:9767]
506	ENSG00000041357	-0.339595	6.31392	-2.53027	0.0154986	0.0908008	-3.61424	NOT	PSMA4	proteasome 20S subunit alpha 4 [Source:HGNC Symbol;Acc:HGNC:9533]
507	ENSG00000041515	0.80282	0.575894	1.86707	0.0693397	0.201781	-4.42148	NOT	MYO16	myosin XVI [Source:HGNC Symbol;Acc:HGNC:29822]
508	ENSG00000041802	0.0177547	4.68475	0.0980403	0.922397	0.957467	-6.53135	NOT	LSG1	large 60S subunit nuclear export GTPase 1 [Source:HGNC Symbol;Acc:HGNC:25652]
509	ENSG00000041880	-0.580616	3.15536	-3.03877	0.00420302	0.0485208	-2.24306	NOT	PARP3	poly(ADP-ribose) polymerase family member 3 [Source:HGNC Symbol;Acc:HGNC:273]
510	ENSG00000041988	0.0952543	3.74768	0.498474	0.62092	0.763385	-6.31989	NOT	THAP3	THAP domain containing 3 [Source:HGNC Symbol;Acc:HGNC:20855]
511	ENSG00000042062	0.256713	3.14772	1.26038	0.214942	0.397787	-5.59369	NOT	RIPOR3	RIPOR family member 3 [Source:HGNC Symbol;Acc:HGNC:16168]
512	ENSG00000042088	0.568551	4.68748	3.37823	0.00165313	0.0337831	-1.51924	NOT	TDP1	tyrosyl-DNA phosphodiesterase 1 [Source:HGNC Symbol;Acc:HGNC:18884]
513	ENSG00000042286	-0.558659	2.73292	-2.33656	0.0246338	0.114095	-3.77161	NOT	AIFM2	apoptosis inducing factor mitochondria associated 2 [Source:HGNC Symbol;Acc:HGNC:21411]
514	ENSG00000042317	-0.158053	1.70384	-0.820297	0.416979	0.600136	-5.84149	NOT	SPATA7	spermatogenesis associated 7 [Source:HGNC Symbol;Acc:HGNC:20423]
515	ENSG00000042429	-0.614868	-0.00710993	-2.5528	0.0146669	0.0884067	-3.08552	NOT	MED17	mediator complex subunit 17 [Source:HGNC Symbol;Acc:HGNC:2375]
516	ENSG00000042445	-0.497603	4.48857	-3.06704	0.00389556	0.0472345	-2.29134	NOT	RETSAT	retinol saturase [Source:HGNC Symbol;Acc:HGNC:25991]
517	ENSG00000042493	-0.539076	6.76724	-2.24563	0.0304045	0.128711	-4.21142	NOT	CAPG	capping actin protein, gelsolin like [Source:HGNC Symbol;Acc:HGNC:1474]
518	ENSG00000042753	-0.5108	5.70756	-2.25769	0.0295756	0.126865	-4.17457	NOT	AP2S1	adaptor related protein complex 2 subunit sigma 1 [Source:HGNC Symbol;Acc:HGNC:565]
519	ENSG00000042781	0.102688	-1.79553	0.166013	0.868995	0.926779	-5.81702	NOT	USH2A	usherin [Source:HGNC Symbol;Acc:HGNC:12601]
520	ENSG00000042813	0.494238	-3.15526	1.02205	0.312988	0.500741	-5.28498	NOT	ZPBP	zona pellucida binding protein [Source:HGNC Symbol;Acc:HGNC:15662]
521	ENSG00000042832	0.557702	5.63238	2.39893	0.0212664	0.105806	-3.88695	NOT	TG	thyroglobulin [Source:HGNC Symbol;Acc:HGNC:11764]
20342	ENSG00000283573	3.6835	-0.805229	5.33185	4.2496e-06	0.00225795	4.05532	UP	AL157371.2	novel transcript
523	ENSG00000043039	0.586795	-3.32781	1.22073	0.229438	0.413355	-5.07948	NOT	BARX2	BARX homeobox 2 [Source:HGNC Symbol;Acc:HGNC:956]
524	ENSG00000043093	0.285533	5.14728	1.97033	0.0558514	0.180049	-4.70708	NOT	DCUN1D1	defective in cullin neddylation 1 domain containing 1 [Source:HGNC Symbol;Acc:HGNC:18184]
525	ENSG00000043143	-0.27629	6.58162	-1.70613	0.0958497	0.244308	-5.1851	NOT	JADE2	jade family PHD finger 2 [Source:HGNC Symbol;Acc:HGNC:22984]
20341	ENSG00000283566	1.34747	-0.571325	3.45138	0.0013444	0.0311615	-1.01076	UP	AC243725.1	dual specificity mitogen-activated protein kinase kinase 3
527	ENSG00000043514	-0.50937	4.51382	-2.88624	0.00629525	0.0582107	-2.73186	NOT	TRIT1	tRNA isopentenyltransferase 1 [Source:HGNC Symbol;Acc:HGNC:20286]
20337	ENSG00000283538	1.45794	-0.0921207	3.54015	0.00104358	0.0286805	-0.796511	UP	AC005972.3	novel transcript
529	ENSG00000044090	-0.574424	2.67415	-2.23464	0.0311777	0.13036	-3.96804	NOT	CUL7	cullin 7 [Source:HGNC Symbol;Acc:HGNC:21024]
530	ENSG00000044115	-0.494847	6.60485	-3.00611	0.00458668	0.0509167	-2.51007	NOT	CTNNA1	catenin alpha 1 [Source:HGNC Symbol;Acc:HGNC:2509]
531	ENSG00000044446	-0.0138271	5.56831	-0.124398	0.901632	0.945719	-6.57506	NOT	PHKA2	phosphorylase kinase regulatory subunit alpha 2 [Source:HGNC Symbol;Acc:HGNC:8926]
532	ENSG00000044459	-0.334747	3.25424	-1.35399	0.18345	0.361217	-5.48468	NOT	CNTLN	centlein [Source:HGNC Symbol;Acc:HGNC:23432]
533	ENSG00000044524	0.834043	-3.04972	1.51396	0.138011	0.303918	-4.73769	NOT	EPHA3	EPH receptor A3 [Source:HGNC Symbol;Acc:HGNC:3387]
534	ENSG00000044574	0.887217	8.90974	3.67091	0.000715252	0.0244072	-0.763853	NOT	HSPA5	heat shock protein family A (Hsp70) member 5 [Source:HGNC Symbol;Acc:HGNC:5238]
535	ENSG00000046604	-0.0709502	-2.75508	-0.189794	0.850444	0.915428	-5.76241	NOT	DSG2	desmoglein 2 [Source:HGNC Symbol;Acc:HGNC:3049]
536	ENSG00000046647	-0.11991	3.86339	-1.12267	0.26837	0.454789	-5.83432	NOT	GEMIN8	gem nuclear organelle associated protein 8 [Source:HGNC Symbol;Acc:HGNC:26044]
537	ENSG00000046651	0.0382793	6.23972	0.299403	0.766206	0.861909	-6.55151	NOT	OFD1	OFD1 centriole and centriolar satellite protein [Source:HGNC Symbol;Acc:HGNC:2567]
538	ENSG00000046653	-0.174056	2.46291	-0.803353	0.426587	0.608616	-5.95434	NOT	GPM6B	glycoprotein M6B [Source:HGNC Symbol;Acc:HGNC:4461]
539	ENSG00000046889	0.65294	-2.52915	1.12633	0.266836	0.453079	-5.21159	NOT	PREX2	phosphatidylinositol-3,4,5-trisphosphate dependent Rac exchange factor 2 [Source:HGNC Symbol;Acc:HGNC:22950]
540	ENSG00000047056	-0.0610871	6.60913	-0.588435	0.559596	0.716726	-6.42491	NOT	WDR37	WD repeat domain 37 [Source:HGNC Symbol;Acc:HGNC:31406]
541	ENSG00000047188	-0.019759	5.99935	-0.114935	0.90908	0.950596	-6.58659	NOT	YTHDC2	YTH domain containing 2 [Source:HGNC Symbol;Acc:HGNC:24721]
542	ENSG00000047230	-0.172775	3.41145	-1.10405	0.276264	0.463392	-5.8	NOT	CTPS2	CTP synthase 2 [Source:HGNC Symbol;Acc:HGNC:2520]
543	ENSG00000047249	0.468782	5.18895	3.0025	0.00463099	0.0511259	-2.49584	NOT	ATP6V1H	ATPase H+ transporting V1 subunit H [Source:HGNC Symbol;Acc:HGNC:18303]
544	ENSG00000047315	-0.0433674	6.44663	-0.301455	0.764652	0.861195	-6.55221	NOT	POLR2B	RNA polymerase II subunit B [Source:HGNC Symbol;Acc:HGNC:9188]
545	ENSG00000047346	0.875898	4.69808	2.69524	0.0102865	0.0742448	-3.19592	NOT	FAM214A	family with sequence similarity 214 member A [Source:HGNC Symbol;Acc:HGNC:25609]
546	ENSG00000047365	-0.0139404	6.67545	-0.0700279	0.944525	0.968558	-6.59613	NOT	ARAP2	ArfGAP with RhoGAP domain, ankyrin repeat and PH domain 2 [Source:HGNC Symbol;Acc:HGNC:16924]
547	ENSG00000047410	-0.252755	6.83252	-1.75566	0.0869135	0.230447	-5.1053	NOT	TPR	translocated promoter region, nuclear basket protein [Source:HGNC Symbol;Acc:HGNC:12017]
548	ENSG00000047457	-0.211044	-0.464041	-0.666856	0.508748	0.678518	-5.70917	NOT	CP	ceruloplasmin [Source:HGNC Symbol;Acc:HGNC:2295]
549	ENSG00000047578	0.134887	5.35202	0.99124	0.327613	0.515513	-6.08775	NOT	KIAA0556	KIAA0556 [Source:HGNC Symbol;Acc:HGNC:29068]
550	ENSG00000047579	0.331449	5.02626	2.29759	0.0269743	0.119896	-4.07366	NOT	DTNBP1	dystrobrevin binding protein 1 [Source:HGNC Symbol;Acc:HGNC:17328]
551	ENSG00000047617	-0.0556956	-0.90518	-0.121289	0.904078	0.947326	-5.87735	NOT	ANO2	anoctamin 2 [Source:HGNC Symbol;Acc:HGNC:1183]
552	ENSG00000047621	0.0189088	3.58062	0.123453	0.902376	0.946403	-6.41491	NOT	C12orf4	chromosome 12 open reading frame 4 [Source:HGNC Symbol;Acc:HGNC:1184]
553	ENSG00000047634	0.479509	4.50076	1.80021	0.0794811	0.218082	-4.96177	NOT	SCML1	Scm polycomb group protein like 1 [Source:HGNC Symbol;Acc:HGNC:10580]
554	ENSG00000047644	-0.358659	6.01476	-2.2891	0.0275102	0.12142	-4.11894	NOT	WWC3	WWC family member 3 [Source:HGNC Symbol;Acc:HGNC:29237]
555	ENSG00000047648	0.277124	2.1727	1.02173	0.313138	0.50083	-5.72784	NOT	ARHGAP6	Rho GTPase activating protein 6 [Source:HGNC Symbol;Acc:HGNC:676]
556	ENSG00000047662	0.353043	3.64933	2.09368	0.0427668	0.154825	-4.35939	NOT	FAM184B	family with sequence similarity 184 member B [Source:HGNC Symbol;Acc:HGNC:29235]
557	ENSG00000047849	-0.470666	6.69239	-3.21822	0.00258073	0.0398643	-1.97932	NOT	MAP4	microtubule associated protein 4 [Source:HGNC Symbol;Acc:HGNC:6862]
558	ENSG00000047932	0.0788904	2.74474	0.201976	0.840974	0.909486	-6.29205	NOT	GOPC	golgi associated PDZ and coiled-coil motif containing [Source:HGNC Symbol;Acc:HGNC:17643]
559	ENSG00000048028	-0.300124	4.98872	-1.85151	0.0715961	0.205231	-4.90348	NOT	USP28	ubiquitin specific peptidase 28 [Source:HGNC Symbol;Acc:HGNC:12625]
560	ENSG00000048052	-0.300823	5.23023	-1.3596	0.181683	0.359367	-5.65944	NOT	HDAC9	histone deacetylase 9 [Source:HGNC Symbol;Acc:HGNC:14065]
561	ENSG00000048140	-0.646234	5.0903	-3.2807	0.00217119	0.0369285	-1.78479	NOT	TSPAN17	tetraspanin 17 [Source:HGNC Symbol;Acc:HGNC:13594]
562	ENSG00000048342	-0.00880641	3.52745	-0.0194873	0.984551	0.991811	-6.41547	NOT	CC2D2A	coiled-coil and C2 domain containing 2A [Source:HGNC Symbol;Acc:HGNC:29253]
563	ENSG00000048392	0.143838	4.62473	0.969193	0.338357	0.526028	-6.06659	NOT	RRM2B	ribonucleotide reductase regulatory TP53 inducible subunit M2B [Source:HGNC Symbol;Acc:HGNC:17296]
564	ENSG00000048405	0.0427833	6.21938	0.290792	0.772735	0.866422	-6.55388	NOT	ZNF800	zinc finger protein 800 [Source:HGNC Symbol;Acc:HGNC:27267]
565	ENSG00000048471	0.311563	5.29314	1.46139	0.151832	0.322472	-5.52843	NOT	SNX29	sorting nexin 29 [Source:HGNC Symbol;Acc:HGNC:30542]
566	ENSG00000048544	-0.0158165	4.25674	-0.138828	0.890293	0.938863	-6.48855	NOT	MRPS10	mitochondrial ribosomal protein S10 [Source:HGNC Symbol;Acc:HGNC:14502]
567	ENSG00000048545	0.582315	-3.44912	1.3909	0.172055	0.348849	-4.87934	NOT	GUCA1A	guanylate cyclase activator 1A [Source:HGNC Symbol;Acc:HGNC:4678]
568	ENSG00000048649	0.307369	6.33165	2.06756	0.045288	0.160064	-4.5569	NOT	RSF1	remodeling and spacing factor 1 [Source:HGNC Symbol;Acc:HGNC:18118]
569	ENSG00000048707	0.0333218	6.74825	0.22507	0.823087	0.898599	-6.57318	NOT	VPS13D	vacuolar protein sorting 13 homolog D [Source:HGNC Symbol;Acc:HGNC:23595]
570	ENSG00000048740	0.147611	9.16701	0.658297	0.514173	0.682337	-6.35527	NOT	CELF2	CUGBP Elav-like family member 2 [Source:HGNC Symbol;Acc:HGNC:2550]
571	ENSG00000048828	-0.423176	7.48559	-3.05922	0.00397841	0.0478044	-2.37706	NOT	FAM120A	family with sequence similarity 120A [Source:HGNC Symbol;Acc:HGNC:13247]
572	ENSG00000048991	-0.21458	5.21163	-1.55667	0.12754	0.290297	-5.38536	NOT	R3HDM1	R3H domain containing 1 [Source:HGNC Symbol;Acc:HGNC:9757]
573	ENSG00000049089	0.101624	4.36527	0.442652	0.660437	0.791045	-6.41161	NOT	COL9A2	collagen type IX alpha 2 chain [Source:HGNC Symbol;Acc:HGNC:2218]
574	ENSG00000049130	-0.00767365	-2.82989	-0.023855	0.981089	0.990206	-5.77544	NOT	KITLG	KIT ligand [Source:HGNC Symbol;Acc:HGNC:6343]
575	ENSG00000049167	-0.31356	2.83107	-2.01176	0.0511142	0.170809	-4.41054	NOT	ERCC8	ERCC excision repair 8, CSA ubiquitin ligase complex subunit [Source:HGNC Symbol;Acc:HGNC:3439]
576	ENSG00000049192	0.389339	1.74146	1.72512	0.0923379	0.239148	-4.77155	NOT	ADAMTS6	ADAM metallopeptidase with thrombospondin type 1 motif 6 [Source:HGNC Symbol;Acc:HGNC:222]
577	ENSG00000049239	-0.779043	6.3011	-3.78493	0.000512336	0.0204954	-0.462526	NOT	H6PD	hexose-6-phosphate dehydrogenase/glucose 1-dehydrogenase [Source:HGNC Symbol;Acc:HGNC:4795]
578	ENSG00000049245	-0.233666	6.5986	-2.25157	0.0299933	0.12778	-4.20019	NOT	VAMP3	vesicle associated membrane protein 3 [Source:HGNC Symbol;Acc:HGNC:12644]
579	ENSG00000049246	0.0299343	3.86028	0.153739	0.878599	0.932862	-6.4447	NOT	PER3	period circadian regulator 3 [Source:HGNC Symbol;Acc:HGNC:8847]
580	ENSG00000049247	-0.106273	3.34473	-0.282062	0.779371	0.87058	-6.35124	NOT	UTS2	urotensin 2 [Source:HGNC Symbol;Acc:HGNC:12636]
581	ENSG00000049249	0.916962	1.89716	2.71194	0.00986085	0.0728733	-2.89523	NOT	TNFRSF9	TNF receptor superfamily member 9 [Source:HGNC Symbol;Acc:HGNC:11924]
582	ENSG00000049283	-0.501978	-2.7226	-1.13948	0.261377	0.447477	-5.18704	NOT	EPN3	epsin 3 [Source:HGNC Symbol;Acc:HGNC:18235]
583	ENSG00000049323	0.469869	2.20815	1.21834	0.230333	0.414344	-5.52319	NOT	LTBP1	latent transforming growth factor beta binding protein 1 [Source:HGNC Symbol;Acc:HGNC:6714]
584	ENSG00000049449	-0.563823	1.39881	-1.99386	0.0531165	0.174822	-4.27746	NOT	RCN1	reticulocalbin 1 [Source:HGNC Symbol;Acc:HGNC:9934]
585	ENSG00000049540	0.713246	-2.59842	1.74261	0.0891969	0.23377	-4.43173	NOT	ELN	elastin [Source:HGNC Symbol;Acc:HGNC:3327]
586	ENSG00000049541	-0.00661806	4.23817	-0.0486587	0.961437	0.978147	-6.49559	NOT	RFC2	replication factor C subunit 2 [Source:HGNC Symbol;Acc:HGNC:9970]
587	ENSG00000049618	0.169794	7.0144	0.85175	0.399497	0.58482	-6.23625	NOT	ARID1B	AT-rich interaction domain 1B [Source:HGNC Symbol;Acc:HGNC:18040]
588	ENSG00000049656	-0.200138	6.61972	-1.53781	0.132082	0.296678	-5.44273	NOT	CLPTM1L	CLPTM1 like [Source:HGNC Symbol;Acc:HGNC:24308]
589	ENSG00000049759	0.537913	3.31919	2.08931	0.0431795	0.155536	-4.33141	NOT	NEDD4L	NEDD4 like E3 ubiquitin protein ligase [Source:HGNC Symbol;Acc:HGNC:7728]
590	ENSG00000049768	-0.172377	2.78191	-0.910854	0.367907	0.554981	-5.90731	NOT	FOXP3	forkhead box P3 [Source:HGNC Symbol;Acc:HGNC:6106]
591	ENSG00000049769	-0.488275	3.51896	-2.3728	0.0226232	0.109226	-3.78544	NOT	PPP1R3F	protein phosphatase 1 regulatory subunit 3F [Source:HGNC Symbol;Acc:HGNC:14944]
592	ENSG00000049860	-0.288285	6.4861	-2.33524	0.0247104	0.114259	-4.02966	NOT	HEXB	hexosaminidase subunit beta [Source:HGNC Symbol;Acc:HGNC:4879]
593	ENSG00000049883	-0.553285	2.68616	-2.44293	0.0191473	0.101376	-3.54823	NOT	PTCD2	pentatricopeptide repeat domain 2 [Source:HGNC Symbol;Acc:HGNC:25734]
594	ENSG00000050030	0.562594	-0.0993807	1.51936	0.136651	0.302257	-4.88561	NOT	NEXMIF	neurite extension and migration factor [Source:HGNC Symbol;Acc:HGNC:29433]
595	ENSG00000050165	0.386965	0.332679	1.04813	0.30096	0.48906	-5.48155	NOT	DKK3	dickkopf WNT signaling pathway inhibitor 3 [Source:HGNC Symbol;Acc:HGNC:2893]
596	ENSG00000050327	0.387525	1.53645	1.64711	0.107485	0.261358	-4.86762	NOT	ARHGEF5	Rho guanine nucleotide exchange factor 5 [Source:HGNC Symbol;Acc:HGNC:13209]
597	ENSG00000050344	-0.269816	3.51723	-1.61379	0.114549	0.271932	-5.15334	NOT	NFE2L3	nuclear factor, erythroid 2 like 3 [Source:HGNC Symbol;Acc:HGNC:7783]
598	ENSG00000050393	-0.306437	3.69057	-1.96387	0.0566241	0.181607	-4.59539	NOT	MCUR1	mitochondrial calcium uniporter regulator 1 [Source:HGNC Symbol;Acc:HGNC:21097]
599	ENSG00000050405	-0.339172	1.84559	-1.6982	0.0973505	0.246222	-4.81975	NOT	LIMA1	LIM domain and actin binding 1 [Source:HGNC Symbol;Acc:HGNC:24636]
[truncated: 20,089 more rows]

## Sheet: ABMR_DEGs_limma
	ensembl_gene_id	external_gene_name	logFC	AveExpr	t	P.Value	adj.P.Val	B	change	description
[truncated: 20,688 more rows]

## Sheet: Donor_DEGs_limma
	ensembl_gene_id	logFC	AveExpr	t	P.Value	adj.P.Val	B	change	external_gene_name	description
[truncated: 20,407 more rows]
